# Supplementary material for: Tumor Microenvironment Characterization in Gastric Cancer Identifies Prognostic and Immunotherapeutically Relevant Gene Signatures
Source: Oxford University Press journal article supplement (doi:10.1158/2326-6066.cir-18-0436), 2019-03-06
Supplement: 23266066cir180436-sup-204325_4_supp_5320157_pmcfmm.xlsx [file 23266066cir180436-sup-204325_4_supp_5320157_pmcfmm.xlsx]

## Sheet: S1
Supplementary Table-S1: Basic information of series used for estimating fractions of tumor microenvironment cells
Series accession numbers	Platform used	No. of input patients	AJCC_stage	Gender	Mean age, [min, max]	Region	Survivval Outcome
GSE84437	Illumina HumanHT-12 V3.0 expression beadchip	431	I: 18; II: 206; III: 209	Female:137, Male:296	60.1, [27, 86]	Korea	OS
GSE34942	Affymetrix Human Genome U133 Plus 2.0 Array	56	I: 11; II: 11; III: 19; IV: 13; NA:2	Female:20, Male:36	69, [43, 85]	Singapore	OS
GSE15459	Affymetrix Human Genome U133 Plus 2.0 Array	191	I: 31; II: 29; III: 72; IV: 60;	Female:67, Male:125	64.4, [23, 92]	Singapore	OS
GSE57303	Affymetrix Human Genome U133 Plus 2.0 Array	70	I: 3; II: 9; III: 41; IV: 17;	Female:18, Male:52	60.7, [37, 79]	China	OS
ACRG/GSE62254	Affymetrix Human Genome U133 Plus 2.0 Array	300	I: 30; II: 97; III: 96; IV: 77;	Female:101, Male:199	64, [24, 86]	Asia	OS
GSE29272	Affymetrix Human Genome U133A Array	134	I: 5; II: 5; III: 113; IV: 11;	Female:31, Male:103	56.7, [23, 73]	USA	OS
GSE26253	Illumina HumanRef-8 WG-DASL v3.0	432	I: 68; II: 167; III: 130; IV: 67;	NA	NA	Korea	RFS
TCGA-STAD	Illumina RNAseq	374	I: 52; II: 149; III: 132; IV: 25; NA:16	Female:134, Male:240	67, [35, 90]	NA	OS

## Sheet: S2
Supplementary Table-S2: Relative Fractions of tumor microenvironment cells of 1524 gastric cancer patients with overall survival informations
ID	Project_ID	OS_months	OS_event	Kmeans_clusters	B.cells.naive	B.cells.memory	Plasma.cells	T.cells.CD8	T.cells.CD4.naive	T.cells.CD4.memory.resting	T.cells.CD4.memory.activated	T.cells.follicular.helper	T.cells.regulatory.Tregs	T.cells.gamma.delta	NK.cells.resting	NK.cells.activated	Monocytes	Macrophages.M0	Macrophages.M1	Macrophages.M2	Dendritic.cells.resting	Dendritic.cells.activated	Mast.cells.resting	Mast.cells.activated	Eosinophils	Neutrophils	Fibroblasts
GSM1379261	GSE57303	27	1	TMEcluster-C	-0.212876	-0.577689	-0.612574	1.25678	-0.604334	-1.13227	0.489761	-0.0956072	-0.512893	-0.400475	-0.374536	0.0823044	-0.544697	-0.121467	1.29745	0.504927	-0.707939	0.206665	-0.410048	1.07315	-0.245737	0.535093	-0.403944
GSM1379262	GSE57303	12	1	TMEcluster-A	-0.212876	0.194023	1.70593	-0.0237941	3.16205	-0.342552	-0.591232	-0.957897	-0.512893	-0.400475	0.130358	-0.65445	0.640203	-0.53905	-1.02228	-1.16411	-0.707939	-0.534439	-0.410048	-0.230965	-0.245737	-0.673756	-1.29247
GSM1379263	GSE57303	49	0	TMEcluster-A	-0.212876	-0.623739	2.47925	-0.325327	0.0758026	-0.685978	-0.327418	-0.0627518	-0.512893	-0.400475	-0.941342	-0.104047	-0.544697	-0.809231	-0.832078	-1.01965	-0.707939	-0.363723	2.81407	-0.328297	-0.245737	-0.497549	-0.485026
GSM1379264	GSE57303	54	0	TMEcluster-C	-0.212876	2.20424	-0.575582	-0.581338	-0.289395	-1.13227	2.8004	0.604628	-0.512893	2.8457	-0.463039	-0.0325469	-0.544697	-0.994407	1.14972	-1.11115	-0.147902	0.578234	-0.410048	-0.355814	-0.245737	1.3145	-1.78407
GSM1379265	GSE57303	15	1	TMEcluster-A	-0.212876	2.38866	-0.347909	1.15737	-0.604334	-0.962084	-0.591232	-0.158814	0.00474507	1.25741	-0.941342	-0.684529	-0.116601	-0.994407	-0.437637	0.742698	0.639792	-0.567015	0.888559	-0.564779	-0.245737	-0.708294	0.38869
GSM1379266	GSE57303	58	0	TMEcluster-C	-0.212876	-0.88727	-0.0872578	-0.283702	-0.604334	0.582944	0.66602	-0.0295629	-0.512893	1.20283	-0.941342	-0.445462	-0.544697	0.13431	2.5083	0.490357	-0.707939	-0.1091	-0.410048	-1.07174	-0.245737	0.000129203	-0.0903126
GSM1379267	GSE57303	60	0	TMEcluster-B	-0.212876	0.244026	-0.16934	-0.909147	-0.604334	1.26684	-0.591232	-0.816081	-0.512893	-0.400475	0.872641	-0.684529	-0.189098	0.54121	-0.646116	0.948416	-0.0691987	-0.567015	-0.410048	0.406781	-0.245737	-0.260029	1.59828
GSM1379268	GSE57303	22	1	TMEcluster-B	-0.212876	-0.652542	0.0980853	-0.721636	-0.604334	0.570264	-0.436095	-0.104373	-0.315925	-0.400475	-0.696605	-0.603646	-0.544697	0.22261	-0.319095	0.194344	0.768321	2.35643	-0.410048	1.04045	-0.245737	0.950744	-1.38505
GSM1379269	GSE57303	60	0	TMEcluster-A	-0.212876	0.365109	-0.919899	0.429295	-0.604334	1.07821	-0.591232	-0.619974	-0.512893	-0.206913	-0.941342	-0.684529	-0.207036	-0.994407	-0.541291	2.05528	-0.707939	0.166487	4.57631	-1.127	-0.245737	-0.699659	1.56284
GSM1379270	GSE57303	8	0	TMEcluster-C	-0.212876	-1.1047	2.43628	-0.422218	1.59123	-1.13227	-0.58909	0.560549	-0.512893	-0.400475	-0.406165	1.0476	0.402822	-0.994407	0.345984	-0.51149	-0.707939	-0.567015	0.682628	-1.46468	-0.245737	-0.708294	-0.939067
GSM1379271	GSE57303	40	1	TMEcluster-C	-0.212876	1.03354	-0.60807	0.293278	-0.604334	-1.13227	2.6455	1.91951	-0.512893	2.01255	-0.353017	0.614899	-0.178623	-0.902068	0.959944	-0.391392	1.16117	-0.567015	-0.410048	-0.979089	1.46529	-0.708294	0.299247
GSM1379272	GSE57303	18	1	TMEcluster-B	-0.212876	1.273	0.507775	-1.26442	-0.168403	0.395294	-0.591232	0.700324	0.108507	-0.400475	0.495417	-0.684529	0.508468	-0.360215	-0.778976	-0.506825	0.506036	-0.0743273	-0.410048	1.09834	-0.245737	-0.708294	-0.240736
GSM1379273	GSE57303	31	1	TMEcluster-B	-0.212876	0.553211	-1.42657	-0.309182	-0.130662	1.49758	-0.591232	-1.12651	2.9901	-0.400475	1.86503	-0.684529	2.53899	-0.994407	-0.482538	1.15861	0.727896	-0.567015	-0.410048	1.28647	-0.245737	-0.708294	-1.19816
GSM1379274	GSE57303	23	1	TMEcluster-C	-0.212876	-1.08326	-1.31645	3.82722	-0.604334	-1.13227	0.412915	3.12574	-0.512893	-0.400475	-0.941342	2.08712	-0.544697	-0.913351	2.40779	-0.983133	-0.383305	-0.567015	-0.410048	0.527859	-0.245737	-0.708294	-2.10544
GSM1379275	GSE57303	14	1	TMEcluster-B	-0.212876	-0.673005	1.54781	-0.836607	-0.243896	-0.564089	-0.591232	-0.641795	1.44816	-0.400475	-0.941342	0.4008	-0.544697	0.0120836	-1.17199	0.239763	-0.707939	1.81856	-0.410048	-0.656539	-0.245737	1.35278	0.281012
GSM1379276	GSE57303	44	1	TMEcluster-B	-0.212876	0.00659266	1.24092	-0.500764	0.483917	-0.0271319	-0.584808	-1.12651	-0.0900447	-0.400475	0.148805	-0.684529	-0.544697	0.203005	-0.892714	-0.0581626	-0.707939	-0.321773	-0.0555591	-0.314148	-0.245737	1.0707	0.0928366
GSM1379277	GSE57303	50	0	TMEcluster-C	-0.212876	-0.587337	0.180128	0.197554	0.107285	-1.13227	0.953096	-0.843947	-0.512893	-0.400475	-0.941342	1.62515	-0.544697	0.53177	1.08719	-0.28887	-0.173779	-0.567015	-0.410048	-0.162769	-0.245737	2.04966	0.501947
GSM1379278	GSE57303	51	0	TMEcluster-B	-0.212876	0.948245	0.112501	-1.32277	-0.604334	1.61434	-0.591232	0.659057	-0.512893	-0.400475	1.73191	-0.684529	-0.387944	0.614709	-1.33726	-1.31204	0.0957644	0.499229	-0.410048	1.1458	-0.245737	-0.708294	-2.07121
GSM1379279	GSE57303	29	1	TMEcluster-B	-0.212876	0.341266	-0.966983	-0.978279	-0.254152	0.115294	-0.591232	-0.777851	-0.512893	-0.400475	1.4133	-0.684529	-0.544697	1.75304	-1.06288	0.298947	-0.152592	-0.517458	-0.410048	2.26394	-0.245737	4.35083	0.935159
GSM1379280	GSE57303	22	1	TMEcluster-B	-0.212876	-0.558804	0.160454	-0.276131	0.00174084	0.299614	-0.431995	-1.12651	0.0844975	-0.400475	1.65913	-0.684529	-0.544697	0.0341023	0.397689	-0.53262	-0.707939	0.578786	-0.410048	1.54279	-0.245737	0.807695	0.151706
GSM1379281	GSE57303	2	1	TMEcluster-B	-0.212876	-0.758046	0.105246	-0.0324799	-0.604334	0.19882	0.211755	-0.0393038	-0.512893	0.863598	-0.941342	-0.661135	-0.544697	0.197331	0.627695	-0.0687406	-0.628109	-0.494066	-0.410048	1.01391	-0.245737	3.72616	1.14188
GSM1379282	GSE57303	58	0	TMEcluster-C	-0.212876	-0.0154332	-1.02108	0.698114	-0.604334	-0.062769	0.886914	-0.77741	0.909798	-0.400475	1.97582	0.476923	-0.544697	-0.524145	1.33335	0.324187	-0.628109	-0.0629141	-0.410048	-0.209179	-0.245737	-0.4007	-0.391293
GSM1379283	GSE57303	51	1	TMEcluster-A	-0.212876	-0.413759	-1.78966	-0.572782	-0.604334	0.441441	-0.591232	-1.12651	0.560463	-0.400475	-0.941342	0.161509	-0.544697	0.632764	-0.861621	4.27789	3.49672	-0.567015	2.28189	-1.46468	-0.245737	2.54396	2.10777
GSM1379284	GSE57303	25	0	TMEcluster-A	-0.212876	2.61496	0.140456	-0.369033	-0.604334	1.26865	-0.591232	-0.770713	-0.512893	-0.400475	0.0241242	-0.419426	1.53284	-0.826659	-1.39947	-1.12277	1.32704	0.276567	-0.410048	0.183043	2.4202	-0.708294	0.939872
GSM1379285	GSE57303	48	0	TMEcluster-A	-0.212876	-0.39089	1.83639	-0.139897	-0.604334	-0.0976215	-0.492802	-1.1185	0.045685	-0.400475	-0.81391	-0.684529	-0.544697	-0.152638	0.804538	-0.632728	-0.707939	-0.295156	1.64646	-1.3318	-0.245737	-0.708294	-0.374947
GSM1379286	GSE57303	60	0	TMEcluster-B	-0.212876	-0.798943	-0.0596394	0.475014	3.71176	-0.229211	-0.209841	-1.12651	0.394334	-0.400475	-0.410745	-0.684529	-0.544697	0.272378	-0.370298	0.302439	0.190862	-0.567015	-0.410048	0.30309	-0.245737	0.447686	-0.66105
GSM1379287	GSE57303	60	0	TMEcluster-A	-0.212876	-0.642425	0.635899	-0.402214	-0.604334	1.10964	-0.591232	-0.268358	-0.512893	-0.400475	-0.941342	-0.242784	-0.544697	0.430871	0.187123	0.108336	-0.707939	-0.315673	-0.410048	0.112593	-0.245737	0.247374	0.868918
GSM1379288	GSE57303	8	1	TMEcluster-B	3.15706	-1.1047	-1.27827	-0.916955	-0.604334	2.36904	-0.591232	1.69709	-0.25399	-0.400475	1.77159	-0.684529	-0.383942	-0.184015	-1.30547	0.700818	0.763277	0.855365	-0.410048	2.36431	-0.245737	0.575278	0.0481138
GSM1379289	GSE57303	24	1	TMEcluster-B	-0.212876	0.211806	-1.61951	-0.127988	-0.604334	-1.03707	-0.591232	-0.983982	3.51547	-0.400475	-0.832017	-0.117594	-0.544697	3.86026	-0.0553269	0.747343	-0.707939	-0.492107	-0.410048	0.353385	-0.245737	0.617339	-0.496597
GSM1379290	GSE57303	60	0	TMEcluster-A	-0.212876	1.06433	-0.55112	-0.73779	-0.604334	0.755924	-0.591232	1.16076	-0.512893	-0.400475	-0.941342	2.39315	0.383653	-0.416208	1.90136	-1.17376	0.401356	-0.567015	-0.410048	1.27312	-0.245737	-0.691025	1.81908
GSM1379291	GSE57303	5	1	TMEcluster-C	-0.212876	-0.726677	-1.08164	1.86896	-0.604334	-1.13227	3.1583	-0.772019	-0.512893	-0.400475	-0.941342	0.855538	-0.544697	0.28248	0.589589	0.380749	-0.696535	-0.567015	-0.410048	-0.0667452	-0.245737	-0.0584054	-0.162372
GSM1379292	GSE57303	22	1	TMEcluster-A	-0.212876	2.11835	-0.519561	-0.99582	0.680418	2.5836	-0.591232	0.179773	-0.512893	-0.400475	2.15284	-0.684529	2.17864	-0.983145	-1.35086	-0.759656	0.302947	-0.218529	-0.410048	-0.322111	-0.245737	-0.708294	-0.568594
GSM1379293	GSE57303	10	1	TMEcluster-A	-0.212876	0.939627	-0.70335	-0.214193	2.36121	2.27609	-0.591232	0.801443	-0.512893	-0.400475	0.671669	-0.127878	3.53102	-0.499589	-1.55434	-1.42387	-0.232421	0.209055	-0.410048	-0.342754	6.18873	-0.708294	-1.01633
GSM1379294	GSE57303	52	0	TMEcluster-C	-0.212876	0.243261	-0.354695	-0.339464	-0.600672	-0.299951	-0.591232	-0.479572	1.40078	-0.400475	-0.941342	1.03306	-0.544697	1.1512	1.25376	0.553383	0.870857	-0.567015	-0.410048	-0.761726	-0.245737	-0.708294	-0.00664011
GSM1379295	GSE57303	13	1	TMEcluster-A	7.18566	-1.1047	1.06813	-0.91187	0.763911	-0.0452083	-0.591232	-0.50088	-0.512893	-0.400475	-0.0516807	-0.189133	-0.544697	1.0343	-0.254675	-0.728681	-0.707939	-0.444902	-0.410048	0.320197	-0.245737	0.521179	1.24084
GSM1379296	GSE57303	44	0	TMEcluster-B	-0.212876	0.413679	0.274863	0.0682578	-0.604334	-0.201257	-0.591232	0.410409	1.00281	-0.400475	1.02765	-0.684529	-0.0461628	-0.506866	-0.301377	-0.264456	0.540622	-0.0202853	-0.410048	0.92537	-0.245737	-0.206925	-0.305225
GSM1379297	GSE57303	49	0	TMEcluster-C	-0.212876	-0.830227	1.53402	0.109295	-0.604334	-1.13227	0.201952	0.484344	0.814064	-0.400475	0.0474893	-0.677845	-0.544697	0.556333	-0.0602281	-0.730403	-0.707939	-0.567015	-0.410048	-0.149194	-0.245737	-0.0455009	0.202007
GSM1379298	GSE57303	38	0	TMEcluster-A	-0.212876	-0.224047	-0.482329	-0.776676	1.74847	1.76963	-0.591232	-0.92569	-0.512893	0.0637204	-0.864144	-0.476241	-0.35406	-0.994407	-1.20986	1.39821	-0.707939	0.0299986	4.17581	-0.0565266	-0.245737	-0.0755026	2.06045
GSM1379299	GSE57303	24	1	TMEcluster-A	-0.212876	0.209249	-1.33954	0.648453	-0.604334	-0.130123	-0.591232	1.3465	-0.512893	-0.400475	-0.941342	1.20598	-0.544697	-0.38157	-0.290719	2.21729	1.50232	0.769571	-0.410048	-0.375952	-0.245737	0.0404151	-0.378932
GSM1379300	GSE57303	50	0	TMEcluster-C	-0.212876	-1.1047	1.52409	0.255756	-0.604334	-0.85651	0.877646	-0.0925351	-0.106161	-0.400475	-0.794402	-0.647221	-0.544697	-0.0996114	-0.174757	0.555745	-0.707939	-0.487328	-0.410048	-0.840809	-0.245737	-0.708294	1.55768
GSM1379301	GSE57303	17	0	TMEcluster-C	1.50644	-1.1047	0.241422	-0.179276	-0.604334	0.74442	0.857412	-0.67505	-0.512893	3.81874	-0.941342	-0.621245	-0.544697	1.19268	0.341085	-0.0295797	-0.315064	-0.567015	0.0486344	-1.46468	-0.245737	-0.401242	-1.40158
GSM1379302	GSE57303	15	1	TMEcluster-B	-0.212876	-0.34026	0.996473	-0.511399	-0.604334	1.11934	-0.591232	0.0578979	-0.512893	-0.400475	0.598807	0.3383	1.32395	-0.509307	-1.33099	-1.46172	0.790079	0.117582	-0.410048	1.74122	-0.245737	0.165668	-1.16344
GSM1379303	GSE57303	26	1	TMEcluster-A	-0.212876	0.389483	0.799659	-0.478667	0.822133	0.44553	-0.591232	-0.765864	-0.512893	-0.400475	-0.252561	-0.557087	0.676071	0.654216	0.141713	-0.759574	0.713877	-0.567015	-0.410048	-0.790944	-0.245737	-0.708294	0.710783
GSM1379304	GSE57303	13	1	TMEcluster-B	-0.212876	-0.620723	-1.11056	-0.978462	0.11357	1.24522	-0.571959	-1.00909	-0.512893	-0.400475	2.39808	-0.684529	-0.544697	1.68152	0.131155	1.11951	-0.707939	0.00629177	-0.410048	0.395218	-0.245737	-0.708294	0.98352
GSM1379305	GSE57303	60	0	TMEcluster-B	-0.212876	0.241214	-0.251813	0.0967758	1.01355	-0.82379	-0.431817	0.174027	-0.512893	-0.400475	-0.106239	-0.0644869	-0.000487399	1.37224	-0.374813	0.4713	-0.707939	-0.00999642	-0.410048	-0.560435	-0.245737	-0.708294	-0.455884
GSM1379306	GSE57303	60	0	TMEcluster-C	-0.212876	-0.491899	-0.359721	2.44759	-0.604334	-0.824308	0.669504	0.0567902	2.58942	-0.400475	-0.852171	1.1269	0.326885	-0.954018	0.104163	-1.14916	-0.707939	3.52506	0.0154709	-1.36594	-0.245737	-0.708294	-0.264558
GSM1379307	GSE57303	13	1	TMEcluster-C	-0.212876	-0.76136	-1.19325	2.5614	-0.604334	-1.13227	1.3792	0.768643	-0.512893	3.35639	-0.941342	0.603878	-0.544697	-0.113528	0.666844	0.375085	3.45587	-0.567015	-0.410048	-1.07721	-0.245737	0.736198	0.661847
GSM1379308	GSE57303	49	0	TMEcluster-C	-0.212876	0.29723	0.610763	-0.603894	-0.604334	-1.10128	-0.288832	0.787903	-0.512893	-0.37339	0.627568	1.81592	-0.197967	-0.61442	0.587308	0.0617832	1.02826	-0.274594	-0.410048	0.1107	-0.245737	-0.708294	-1.2077
GSM1379309	GSE57303	60	0	TMEcluster-B	-0.212876	0.239666	0.324276	-0.589854	1.68718	0.412253	-0.591232	-0.380577	-0.512893	-0.400475	2.00214	-0.684529	2.0761	-0.0452644	-0.796242	-1.30814	0.336072	-0.15197	-0.410048	1.33268	-0.245737	-0.708294	-1.08622
GSM1379310	GSE57303	36	1	TMEcluster-A	-0.212876	0.847411	-0.0516284	1.5605	1.33634	0.102589	-0.591232	-1.12651	-0.512893	-0.400475	-0.453988	-0.624617	1.51364	-0.994407	-0.588151	-0.251139	-0.00815974	-0.567015	1.24664	-0.361578	-0.245737	-0.708294	0.963338
GSM1379311	GSE57303	6	1	TMEcluster-A	-0.212876	-1.1047	1.25081	-0.228579	1.93821	-0.430626	-0.509282	-0.865565	-0.482163	-0.400475	0.658301	0.0191251	-0.544697	-0.514256	0.161268	-0.153817	2.36325	-0.052026	0.146027	-0.385228	-0.245737	-0.708294	-0.629628
GSM1379312	GSE57303	50	0	TMEcluster-A	-0.212876	-0.361239	-0.114794	-0.964199	0.949438	0.542425	2.56953	-1.12651	-0.512893	-0.400475	-0.941342	0.29293	-0.496132	-0.127749	-0.54194	-0.102353	3.15948	-0.294859	-0.410048	0.689439	-0.245737	-0.255766	0.859031
GSM1379313	GSE57303	20	1	TMEcluster-A	-0.212876	-0.668872	-0.644582	-0.258999	-0.604334	0.834174	-0.591232	2.02486	-0.512893	-0.400475	-0.12066	0.245864	3.98941	-0.994407	-0.682951	1.90654	-0.707939	-0.288146	-0.410048	0.539013	-0.245737	-0.234015	-1.55965
GSM1379314	GSE57303	4	1	TMEcluster-B	-0.212876	-0.506066	1.32053	-1.11022	1.83692	-0.500772	-0.591232	-0.323893	-0.351744	-0.400475	0.0208107	-0.684529	-0.544697	0.709596	-0.651768	-0.732151	-0.707939	-0.312194	1.44565	0.258024	-0.245737	0.583496	0.609411
GSM1379315	GSE57303	12	1	TMEcluster-C	-0.212876	-1.1047	0.868787	1.54932	-0.604334	-1.13227	0.62788	-0.29142	-0.512893	1.42079	0.492321	0.213097	-0.544697	-0.994407	0.15313	0.362608	-0.707939	-0.387113	0.643922	-1.46468	-0.245737	0.428184	-0.217443
GSM1379316	GSE57303	9	0	TMEcluster-B	-0.212876	0.228658	-0.706658	-0.817802	0.84079	-0.743967	-0.435328	1.42717	1.45195	-0.400475	2.01112	-0.684529	-0.544697	0.407489	1.32974	0.30084	0.0884691	-0.567015	-0.410048	0.591995	-0.245737	-0.470859	0.353915
GSM1379317	GSE57303	60	0	TMEcluster-C	0.670791	-0.812719	-1.05516	-0.501234	-0.604334	-0.540722	2.58573	1.40067	-0.512893	-0.400475	0.877361	0.848317	0.0825451	-0.740132	2.94506	0.219292	0.650421	0.35152	-0.410048	-0.302811	-0.245737	-0.117687	0.295202
GSM1379318	GSE57303	60	0	TMEcluster-C	-0.212876	0.437168	-1.7087	0.158395	-0.604334	-1.13227	0.00520747	2.3707	1.22324	-0.400475	-0.941342	5.29319	0.304162	-0.0939784	-0.234723	-0.50267	-0.707939	5.23251	0.601748	-1.46468	-0.245737	-0.156293	-0.202205
GSM1379319	GSE57303	33	1	TMEcluster-C	-0.212876	-0.925742	0.282053	0.909715	-0.604334	-0.73941	-0.0565133	2.56325	-0.469871	-0.400475	0.164746	-0.684529	-0.544697	0.979626	0.242366	-0.044434	0.181157	-0.567015	-0.410048	-0.931602	-0.245737	-0.708294	-0.0113906
GSM1379320	GSE57303	60	0	TMEcluster-C	-0.212876	-1.1047	1.05497	1.16885	-0.604334	-0.886669	-0.429577	0.144931	-0.427181	-0.400475	-0.868568	0.169351	-0.544697	1.31609	-0.217405	-0.383373	-0.707939	-0.544901	-0.410048	-0.758051	-0.245737	-0.312869	0.746995
GSM1379321	GSE57303	17	1	TMEcluster-A	-0.212876	3.55389	-0.160289	-1.32277	0.816913	1.29769	-0.591232	-0.481641	-0.180534	-0.400475	0.322897	0.69982	1.90076	-0.91843	-0.909013	-1.51371	-0.707939	0.115509	-0.410048	0.00375851	-0.245737	-0.708294	-1.65646
GSM1379322	GSE57303	46	0	TMEcluster-C	-0.212876	-0.259039	-0.873952	-0.0124906	-0.604334	-0.889571	0.409036	0.0265086	-0.500601	0.719411	-0.941342	0.876111	-0.544697	1.46581	1.58395	1.04894	-0.540272	-0.567015	-0.410048	-0.520237	-0.245737	-0.143939	-0.0215842
GSM1379323	GSE57303	13	0	TMEcluster-B	-0.212876	1.30563	-0.708547	-0.449931	-0.604334	0.834046	-0.591232	-1.12651	1.94998	-0.400475	0.559918	-0.684529	-0.360129	0.120739	-0.575465	-1.51371	-0.707939	0.915959	-0.410048	3.20113	2.1209	0.900425	-0.882098
GSM1379324	GSE57303	37	0	TMEcluster-B	-0.212876	0.186642	1.03486	-0.923223	1.02637	0.146976	-0.591232	-0.691654	-0.512893	-0.400475	0.719969	-0.684529	-0.544697	-0.984553	-0.840926	-0.416533	-0.707939	2.50168	0.329271	0.182939	-0.245737	0.128773	-0.0231207
GSM1379325	GSE57303	50	0	TMEcluster-C	-0.212876	-0.403399	0.706712	0.769412	-0.604334	-1.13227	0.710925	-0.592164	-0.512893	-0.400475	0.631513	-0.684529	-0.544697	-0.516794	0.0414184	0.185622	-0.406551	-0.567015	-0.410048	0.698905	-0.245737	0.105024	-0.183443
GSM1379326	GSE57303	7	0	TMEcluster-A	-0.212876	1.31283	0.1171	-0.559288	-0.604334	0.107952	-0.591232	0.631769	3.81069	-0.400475	-0.213844	-0.684529	0.795905	-0.994407	0.557861	-0.0958721	-0.509446	-0.0290607	-0.410048	-0.477725	3.77781	-0.708294	0.00199564
GSM1379327	GSE57303	5	1	TMEcluster-B	-0.212876	-0.935365	0.531922	-0.0508588	-0.604334	-0.588084	-0.591232	0.787875	-0.0978502	-0.400475	1.18221	-0.390743	-0.544697	0.115196	0.588248	0.273925	0.0677059	-0.567015	-0.410048	0.679515	-0.245737	0.214158	-0.494651
GSM1379328	GSE57303	9	1	TMEcluster-C	-0.212876	-0.700937	-0.299506	2.22781	-0.604334	-1.13227	2.96231	-0.402205	-0.512893	3.31362	-0.941342	0.243973	-0.544697	-0.776055	1.46726	-0.493702	-0.707939	-0.509942	0.244981	-1.46468	-0.245737	-0.296098	1.12526
GSM1379329	GSE57303	8	1	TMEcluster-B	-0.212876	-0.135084	-1.23764	0.467918	-0.604334	-0.89194	-0.257389	0.69646	-0.512893	-0.400475	-0.559077	-0.684529	-0.544697	3.58683	-0.57166	1.202	-0.707939	-0.567015	-0.410048	-0.480471	-0.245737	-0.708294	1.13415
GSM1379330	GSE57303	32	1	TMEcluster-A	1.31697	0.797453	0.57927	0.630608	-0.604334	1.19644	-0.517605	-0.240736	-0.512893	2.13212	-0.941342	-0.684529	-0.544697	-0.994407	-0.86414	-0.0310408	-0.707939	-0.463127	-0.410048	-0.610835	-0.245737	-0.708294	1.57477
GSM1523727	GSE62254	88.73	0	TMEcluster-A	-0.187587	-0.598052	1.04325	1.25382	-0.129839	-0.0684408	-0.159169	-1.06963	-0.226169	-1.06356	-0.409017	0.770927	-0.294533	-0.298896	-0.155589	0.758096	-0.685529	-0.63828	1.38228	-0.665065	-1.0293	1.17753	-1.22754
GSM1523728	GSE62254	88.23	0	TMEcluster-C	-0.50801	0.0645941	-0.834653	1.12577	-0.129839	-0.342829	0.657999	-0.357329	-0.226169	-1.06356	-0.409017	2.07147	-0.294533	0.488079	0.199257	-0.36128	-0.685529	0.744137	-0.776957	-0.522675	0.580716	0.938556	0.415867
GSM1523729	GSE62254	88.23	0	TMEcluster-A	-0.347747	-0.403074	-0.425845	-0.692945	-0.129839	0.52462	-0.718877	-0.412082	-0.226169	0.00741547	-0.409017	-0.202696	-0.294533	-1.16685	-0.395653	-0.691794	4.69762	-0.289583	0.835161	-0.665065	2.14312	0.265792	0.0411025
GSM1523744	GSE62254	105.7	0	TMEcluster-C	-0.50801	1.18108	-0.78626	0.48788	-0.129839	-0.131403	0.846815	0.266092	-0.226169	-1.06356	-0.409017	-0.571988	-0.294533	0.823898	0.249737	-0.0963886	-0.685529	0.760535	-0.47674	-0.477852	0.396327	0.0510457	0.00743277
GSM1523745	GSE62254	105.53	0	TMEcluster-B	-0.50801	-0.744252	-0.0596226	-0.692945	-0.129839	0.621952	0.222354	-1.12686	-0.226169	-0.297404	-0.228628	-0.970527	-0.294533	2.25852	-0.0750759	0.956456	-0.685529	-1.25679	-0.885724	0.264399	-0.678749	1.05899	0.322452
GSM1523746	GSE62254	25.5	1	TMEcluster-B	0.15203	-0.652773	0.637211	-0.692945	-0.129839	0.606773	-0.699349	-0.50095	-0.226169	0.171427	-0.409017	0.883841	-0.294533	1.14534	-1.33086	-0.861443	-0.685529	-0.601133	-0.415231	-0.589325	2.50757	0.137985	-0.688337
GSM1523747	GSE62254	8.7	1	TMEcluster-C	-0.50801	0.200276	0.0110395	1.42539	-0.129839	-0.541599	-0.999802	-0.164779	0.0560716	-0.727398	-0.409017	2.59558	-0.294533	-1.04888	-0.348689	1.15584	-0.685529	-0.598695	-0.885724	0.152949	0.408889	1.25408	-1.15126
GSM1523748	GSE62254	104.93	0	TMEcluster-A	0.780596	-1.04441	0.219645	-0.37709	-0.129839	0.707403	-0.999802	-0.672541	-0.226169	-0.0527711	-0.409017	0.131606	-0.294533	-1.16685	-1.06804	1.18236	1.07609	-0.729951	1.99458	-0.665065	0.764171	0.0394194	0.148296
GSM1523765	GSE62254	14.2	1	TMEcluster-A	-0.50801	-0.748891	0.719038	-0.692945	-0.129839	-0.300273	-0.999802	0.480818	-0.226169	0.0696063	-0.409017	0.132856	-0.294533	1.07041	-0.522869	0.86974	1.03816	-0.998798	-0.25234	-0.460138	1.62171	-0.964756	-0.809619
GSM1523768	GSE62254	24.23	1	TMEcluster-B	-0.413627	-0.50938	-0.601356	-0.692945	-0.129839	0.285298	0.324944	-1.08233	-0.226169	-0.570728	0.80705	-1.22403	-0.233431	1.50172	-1.09532	-0.377267	-0.685529	0.82624	-0.885724	2.32503	0.381359	1.09727	1.13221
GSM1523769	GSE62254	13.73	1	TMEcluster-A	0.606247	-0.240959	-0.725841	-0.692945	-0.129839	-0.0573829	0.703243	-1.36989	-0.226169	0.398509	-0.409017	-0.435909	-0.294533	0.65905	0.161904	0.0638746	1.07664	-0.924352	3.03239	-0.665065	0.469667	-0.632856	0.989783
GSM1523770	GSE62254	22.07	1	TMEcluster-C	-0.50801	-0.167754	-1.14463	-0.102984	-0.129839	-0.810963	2.79573	-0.596049	-0.226169	1.37656	-0.409017	-0.260537	-0.294533	0.0234283	1.47924	0.464682	-0.685529	0.663342	-0.803429	-0.665065	-0.29452	0.628609	-0.415628
GSM1523771	GSE62254	12.67	1	TMEcluster-A	-0.50801	-0.0804644	-2.40892	-0.692945	-0.129839	0.334684	0.49075	-1.06265	-0.226169	3.07247	-0.409017	-1.22403	-0.294533	-0.537478	0.700309	1.35849	-0.261883	-1.2183	1.96488	-0.665065	1.04829	-0.062144	1.91749
GSM1523772	GSE62254	10.03	1	TMEcluster-A	-0.50801	0.43766	-0.107244	-0.692945	-0.129839	0.38803	-0.466526	-0.200811	-0.226169	0.487238	-0.409017	0.253368	7.02753	-1.00101	1.15899	0.67108	-0.0712102	-0.900332	1.55835	-0.665065	-0.264319	-1.78658	1.57294
GSM1523773	GSE62254	4.33	1	TMEcluster-A	-0.157234	-0.298593	-0.60413	-0.692945	-0.129839	1.07154	-0.313432	-1.13995	-0.226169	3.26936	-0.409017	-0.670555	0.584666	-1.16685	-0.242131	0.864775	0.273187	-1.16469	0.116221	-0.530587	0.950907	-0.504513	1.60702
GSM1523774	GSE62254	97.7	0	TMEcluster-A	2.00488	-1.04441	0.719227	-0.692945	-0.129839	1.81347	-0.999802	-0.0281948	-0.226169	0.350862	-0.409017	-0.137209	-0.294533	-1.16685	-0.986992	-0.57658	-0.685529	-0.388667	1.18385	-0.665065	1.41409	-0.964335	0.676363
GSM1523775	GSE62254	97.6	0	TMEcluster-B	0.705358	-1.04441	0.581767	-0.0259914	-0.129839	0.762028	-0.999802	0.809635	-0.226169	-0.724658	-0.409017	0.343188	-0.294533	0.0802827	-0.630255	0.271085	-0.648756	-0.139172	-0.885724	0.771025	-0.321402	-0.184844	-0.399383
GSM1523776	GSE62254	97.47	0	TMEcluster-C	-0.0180657	0.0132533	-0.30679	0.622193	-0.129839	-1.47331	2.14252	-0.0209474	-0.226169	1.60051	-0.409017	-0.651886	-0.294533	-1.16685	2.10362	0.361433	1.00297	-0.678943	0.632578	-0.665065	0.667061	-1.17119	-0.882189
GSM1523777	GSE62254	92.93	0	TMEcluster-B	-0.50801	0.197933	1.18979	-0.692945	-0.129839	1.53504	-0.999802	-0.299579	-0.226169	-1.06356	0.564365	-0.556343	-0.294533	0.930385	-1.1669	0.717536	-0.685529	-0.171724	-0.885724	0.410692	-0.77956	-0.750591	0.0702556
GSM1523778	GSE62254	92.63	0	TMEcluster-B	0.25643	-0.641154	-0.309438	-0.692945	-0.129839	0.313572	0.625245	-0.980387	-0.226169	-1.06356	0.396616	-1.0199	1.14666	0.611918	0.526961	-0.0136548	-0.685529	0.49269	-0.332516	-0.510457	1.52285	1.0718	0.866222
GSM1523779	GSE62254	92.6	0	TMEcluster-A	-0.50801	-1.04441	1.87181	-0.692945	-0.129839	0.77682	-0.999802	0.653787	-0.226169	-0.95982	-0.409017	1.35588	-0.294533	-0.942232	0.388692	-0.0746486	-0.685529	0.829161	-0.177237	-0.577616	-0.584816	0.0903116	-0.786178
GSM1523780	GSE62254	16.4	1	TMEcluster-C	-0.50801	1.30771	-0.579123	0.307635	-0.129839	-1.03513	1.64356	0.138358	-0.226169	-0.825193	0.100695	0.377465	-0.294533	-0.588833	1.72593	0.486518	-0.685529	0.588327	0.112877	-0.665065	-0.0727198	-0.0359531	1.0003
GSM1523781	GSE62254	2.93	1	TMEcluster-B	-0.50801	-0.249668	0.372909	-0.692945	-0.129839	2.05498	-0.999802	-0.0966181	-0.226169	-1.06356	-0.409017	-0.143119	-0.294533	0.376432	-2.0722	-1.11824	0.441415	1.6706	-0.885724	2.68061	-0.975782	-0.909966	-0.724863
GSM1523782	GSE62254	4.4	1	TMEcluster-B	-0.50801	0.467412	-1.4834	-0.692945	-0.129839	1.07078	-0.633662	-0.779627	-0.226169	-1.06356	2.4159	-1.22403	-0.00890354	1.04833	-0.22648	0.278921	-0.685529	-0.223639	-0.885724	2.86716	-1.23338	1.00898	0.380758
GSM1523783	GSE62254	91.93	0	TMEcluster-A	5.70156	-0.0208293	-0.889683	0.119342	-0.129839	0.145817	-0.999802	0.30514	-0.226169	0.263616	-0.409017	-1.12669	-0.294533	-0.349831	-1.57075	-1.02917	2.86317	-0.246593	-0.433315	0.0210411	0.579697	0.193894	-0.480195
GSM1523784	GSE62254	91.3	0	TMEcluster-A	-0.50801	-0.111147	0.369247	-0.692945	-0.129839	0.722271	-0.0900007	-1.06486	-0.226169	0.367633	-0.409017	-0.906748	-0.294533	-1.16685	-1.14619	0.0698078	1.72479	-0.680531	0.702594	-0.665065	2.09447	0.887794	0.0855576
GSM1523785	GSE62254	11.77	1	TMEcluster-C	-0.50801	0.591096	0.123442	1.09631	-0.129839	-1.62438	1.174	0.686429	-0.226169	0.0201699	-0.409017	0.555323	-0.294533	-1.06609	0.794887	-0.011865	0.185675	0.502594	0.557076	-0.665065	0.257455	0.0378183	0.204598
GSM1523786	GSE62254	28.47	1	TMEcluster-A	0.561295	-0.737089	0.490229	-0.692945	-0.129839	1.05806	-0.999802	-0.153342	-0.226169	1.12655	-0.409017	-0.87543	-0.294533	-1.16685	-0.21679	0.288384	0.0921414	0.405647	-0.64609	-0.250629	1.04358	-0.190878	0.236126
GSM1523787	GSE62254	89.63	0	TMEcluster-A	2.75181	-1.04441	0.817173	-0.475101	-0.129839	0.797159	-0.999802	2.0276	-0.226169	-0.828195	-0.409017	1.35275	-0.294533	-1.16685	-0.729033	0.154135	-0.685529	0.506441	-0.122344	-0.24239	-1.23338	-0.811807	-1.89236
GSM1523788	GSE62254	8.27	1	TMEcluster-A	0.555414	-0.493423	0.569819	-0.692945	-0.129839	-0.0100945	-0.369781	0.00250584	-0.226169	0.386686	-0.409017	-0.508433	0.960661	-0.228462	-0.45134	-0.00923488	0.841933	-0.386844	2.28712	-0.665065	-0.0926839	-0.497707	1.61198
GSM1523789	GSE62254	11.8	1	TMEcluster-A	-0.50801	-0.202593	-0.842321	0.895569	-0.129839	0.565295	-0.340226	-1.54089	-0.226169	-1.06356	-0.169377	-0.297169	-0.294533	1.52381	-0.617047	2.76023	-0.685529	-0.0945213	-0.280371	-0.665065	-0.210009	-0.0560921	0.981445
GSM1523790	GSE62254	80.93	0	TMEcluster-B	-0.50801	-1.04441	-1.2961	0.188738	-0.129839	0.0255773	0.126092	-0.652209	-0.226169	-1.06356	-0.409017	2.73707	0.847559	-0.0535186	1.0622	-0.639549	-0.685529	1.35746	-0.885724	0.996755	0.362482	1.20484	1.17383
GSM1523791	GSE62254	81.13	0	TMEcluster-C	-0.50801	0.760218	-1.08159	2.32866	-0.129839	-2.15467	1.10508	-0.485832	0.325169	-1.04626	-0.409017	3.95876	-0.294533	0.366848	1.37505	0.179714	-0.685529	0.251546	-0.885724	-0.0262539	0.404562	0.0966597	0.20942
GSM1523792	GSE62254	80.8	0	TMEcluster-C	-0.50801	0.0416579	0.862488	-0.481036	-0.129839	0.349	1.06942	-1.04082	-0.226169	1.30677	-0.409017	-1.22403	-0.294533	0.123392	0.282477	0.0269593	-0.685529	-0.579896	-0.885724	-0.623938	1.17003	-0.264388	-0.88784
GSM1523793	GSE62254	80.73	0	TMEcluster-C	-0.50801	-1.04441	2.12304	-0.692945	-0.129839	-0.0853309	-0.999802	-0.0574043	7.56639	1.2998	-0.409017	1.77049	1.78543	-0.167968	0.496329	-1.81004	-0.653353	0.209103	-0.885724	0.070724	-1.23338	-0.219885	-0.571778
GSM1523794	GSE62254	27	1	TMEcluster-C	-0.50801	-0.233748	-1.39392	0.0698437	-0.129839	-0.290962	0.449698	0.844817	-0.226169	1.39674	0.801421	2.21327	-0.294533	0.327991	1.99769	0.560779	-0.685529	-1.08242	-0.885724	-0.665065	-1.16327	-0.549806	0.455141
GSM1523795	GSE62254	80.07	0	TMEcluster-B	-0.50801	-0.872549	0.663871	-0.692945	-0.129839	0.588212	0.305766	-1.27198	-0.226169	-1.01224	2.81675	-1.00331	1.34835	1.11998	-0.702655	0.165375	-0.685529	-0.568023	-0.885724	2.47194	-0.915963	0.33299	-0.00686511
GSM1523796	GSE62254	57.63	1	TMEcluster-B	-0.50801	-0.0430437	-0.712294	-0.692945	0.428902	0.217321	0.404079	-1.67989	-0.226169	-0.593931	2.16604	-1.14195	2.65036	0.72881	-0.807947	0.182549	0.196309	-0.231431	0.357852	-0.665065	1.05387	2.08508	2.06188
GSM1523797	GSE62254	28.27	1	TMEcluster-A	0.409684	-0.583444	-0.629154	1.62223	-0.129839	-0.106478	-0.999802	0.0123416	-0.226169	-0.438845	-0.409017	0.102842	-0.294533	-1.16685	-0.0128073	-0.372449	2.48401	-0.513147	-0.182362	-0.665065	1.52852	1.64019	-1.21678
GSM1523798	GSE62254	61.83	1	TMEcluster-C	1.67257	-1.04441	-0.342639	1.28921	-0.129839	-1.23449	0.107546	0.95902	0.919471	2.21951	-0.409017	-1.22403	-0.294533	-0.932503	-0.297612	0.0752356	-0.467285	-0.0916561	0.322163	-0.665065	2.47318	-0.701503	0.279608
GSM1523799	GSE62254	77.5	0	TMEcluster-B	-0.50801	-0.350924	-0.0903684	-0.692945	-0.129839	0.358487	-0.0997066	0.557867	-0.226169	0.416264	-0.409017	-1.22403	-0.294533	-1.16685	-0.479981	0.0649374	-0.64416	-0.0812484	-0.885724	2.02016	0.684317	1.01898	-0.666366
GSM1523800	GSE62254	76.93	0	TMEcluster-C	-0.50801	-0.077397	-1.77208	-0.232891	-0.129839	-1.79733	1.42088	1.48077	-0.226169	0.980729	-0.409017	0.402612	-0.294533	0.241457	2.49104	1.01184	-0.685529	0.0106246	-0.885724	-0.665065	-0.131935	0.712412	-1.45612
GSM1523801	GSE62254	76.93	0	TMEcluster-C	-0.50801	-0.694983	-0.0551514	0.632471	-0.129839	-0.180704	0.610508	-0.0937265	-0.226169	0.750608	-0.409017	1.09139	-0.294533	-0.0346709	0.308174	0.770109	-0.367832	-0.481227	-0.181294	-0.665065	0.0799043	-0.618831	-0.907494
GSM1523802	GSE62254	76.77	0	TMEcluster-C	-0.50801	-0.0258967	-0.29162	-0.692945	-0.129839	-0.657399	0.304296	-0.131932	-0.226169	-0.0427245	-0.409017	-0.30602	-0.294533	-0.894019	1.42721	1.37226	-0.685529	-0.795331	0.326456	-0.665065	0.159886	2.18075	-0.776037
GSM1523803	GSE62254	7.07	1	TMEcluster-A	-0.374133	-0.707975	0.825126	-0.692945	-0.129839	-0.0358258	1.13312	-0.593178	-0.226169	0.459799	-0.409017	-0.57173	-0.294533	0.24527	-0.084906	0.773626	-0.256854	-0.850827	-0.0207211	-0.665065	0.581126	0.0760442	-0.62963
GSM1523804	GSE62254	76.7	0	TMEcluster-B	-0.50801	1.73402	-0.303408	-0.692945	-0.129839	1.03222	-0.999802	-0.904992	-0.226169	-0.407339	1.08546	-1.22403	-0.294533	0.166523	-1.26032	-0.0817645	-0.685529	-0.471884	0.110261	0.510786	1.93328	0.102929	0.462987
GSM1523805	GSE62254	4.47	1	TMEcluster-C	-0.50801	1.19556	-0.0254255	-0.296754	-0.129839	-0.495791	0.535591	1.1361	-0.226169	2.03886	-0.409017	-1.22403	-0.294533	-1.16685	0.444628	-0.344743	0.0381365	1.19245	-0.885724	0.566326	-1.23338	-0.335302	0.803521
GSM1523806	GSE62254	12.7	1	TMEcluster-A	0.653225	-0.800167	0.274778	-0.692945	-0.129839	-0.0738009	-0.0849936	-0.0579712	-0.226169	0.670821	-0.409017	-0.890094	-0.294533	0.630646	-0.648378	0.51777	0.139414	-0.132328	-0.000395679	-0.665065	0.768226	0.176031	-0.498116
GSM1523807	GSE62254	73.73	0	TMEcluster-B	1.22631	-1.03829	-0.345105	-0.692945	-0.129839	-0.143346	-0.0896771	-0.00202889	-0.226169	-0.744754	-0.409017	-0.346291	-0.294533	0.292648	0.194156	0.0508862	-0.459217	-0.0332015	-0.885724	0.540361	1.11266	1.65306	0.244052
GSM1523808	GSE62254	73.5	0	TMEcluster-B	-0.390784	0.522133	-0.582494	-0.692945	-0.129839	0.0577559	-0.308241	0.133153	-0.226169	1.58497	-0.409017	-1.22403	-0.294533	0.469659	-0.5127	0.570272	-0.685529	-0.499353	-0.885724	0.126747	1.0489	0.280566	0.791586
GSM1523809	GSE62254	73.43	0	TMEcluster-C	-0.50801	0.277079	0.281364	1.09872	-0.129839	-0.735259	2.34112	-0.464114	-0.226169	-0.404538	2.41037	-1.00686	-0.294533	-1.16011	0.530895	0.142183	-0.202774	-0.583336	-0.885724	-0.555794	0.987622	1.0681	-0.153841
GSM1523810	GSE62254	73.07	0	TMEcluster-C	-0.50801	-0.036217	-1.44962	1.14567	-0.129839	-1.36457	1.88221	0.574472	-0.226169	0.726278	-0.409017	0.134983	-0.294533	0.879553	1.71494	0.427515	-0.685529	-0.586256	-0.479662	-0.665065	-0.0364201	0.0379744	0.662898
GSM1523811	GSE62254	72.87	0	TMEcluster-C	-0.50801	1.29391	0.213984	-0.0326927	-0.129839	-0.300779	0.160979	1.52762	-0.226169	-0.00643014	-0.409017	0.550192	-0.294533	-1.07912	0.078859	-0.742986	-0.577755	1.64201	-0.805796	-0.137807	-0.0900169	-0.303188	0.154642
GSM1523812	GSE62254	72.83	0	TMEcluster-C	0.336983	-1.04441	-0.193704	1.97614	-0.129839	-1.21941	2.10437	-0.349861	-0.226169	0.555399	-0.409017	-0.39677	-0.294533	-0.261074	0.729058	-0.176914	0.2491	-1.24282	1.34276	-0.665065	1.37323	-0.548125	0.571922
GSM1523813	GSE62254	72.83	0	TMEcluster-A	-0.50801	-0.244452	-1.47306	0.353528	-0.129839	0.57305	-0.0831387	-1.2166	-0.226169	-0.968367	-0.409017	1.39787	-0.294533	1.61568	0.885031	-0.344567	-0.166075	-1.33538	0.927723	-0.665065	1.39032	0.191318	1.00111
GSM1523814	GSE62254	72.73	0	TMEcluster-C	-0.0126077	-0.907015	0.45827	0.245945	-0.129839	-1.2685	-0.711909	2.15087	-0.226169	-1.06356	-0.409017	0.598886	-0.00883364	-0.879178	0.908308	1.26209	-0.219665	-0.0730444	-0.885724	0.752735	0.199291	0.130956	-0.642527
GSM1523815	GSE62254	25.17	1	TMEcluster-C	-0.50801	0.160881	0.40098	4.14814	-0.129839	-2.15467	-0.130395	0.113925	-0.226169	-0.143258	-0.409017	-0.139359	-0.294533	-0.646752	1.08205	2.42927	1.59971	-0.946399	-0.316967	-0.665065	-0.706403	-1.0202	-0.0103432
GSM1523816	GSE62254	72.07	0	TMEcluster-A	-0.50801	0.507267	0.540829	-0.0499994	-0.129839	0.875596	0.52588	0.493827	-0.226169	-0.214025	-0.409017	-0.18961	-0.294533	0.0117472	-0.221447	-0.682643	0.271671	-0.672085	-0.355994	-0.508116	-0.224882	-0.515502	-0.882693
GSM1523817	GSE62254	6.23	1	TMEcluster-B	-0.50801	0.0950358	-1.22547	-0.692945	-0.129839	-0.859565	-0.670698	0.0529619	-0.226169	-1.06356	-0.409017	1.61149	-0.294533	2.58835	-0.710689	0.690659	-0.685529	-1.16567	0.988094	0.629762	0.753176	0.395773	-0.260287
GSM1523818	GSE62254	9.83	1	TMEcluster-A	-0.50801	0.54785	0.418214	-0.279162	-0.129839	0.250629	0.68885	-1.60269	0.496517	0.482756	1.34766	-1.22403	-0.294533	-1.16685	0.515378	0.553789	2.75701	-0.99561	0.550061	-0.665065	-0.688541	0.356439	-1.97205
GSM1523819	GSE62254	10.1	1	TMEcluster-A	-0.50801	0.810627	0.795863	0.441482	-0.129839	0.744314	-0.999802	-1.19808	-0.226169	-0.542535	-0.409017	0.961712	-0.294533	-0.792041	-1.38917	0.373826	3.23228	0.361996	1.00104	-0.665065	-0.844151	-0.925691	-0.62209
GSM1523820	GSE62254	23.7	1	TMEcluster-B	-0.50801	-0.0240294	-0.0935029	-0.641538	-0.129839	-0.388449	-0.788407	-0.45579	-0.226169	0.50136	-0.409017	1.75422	-0.294533	0.410429	-1.26786	1.08841	-0.685529	1.82305	-0.885724	0.357301	-1.23338	1.05419	-1.53946
GSM1523821	GSE62254	71.1	0	TMEcluster-C	0.850024	-0.490447	0.0366302	0.338229	-0.129839	-0.165302	1.79314	-0.611684	-0.226169	-1.06356	2.34301	-1.00356	-0.294533	0.222738	1.20579	0.227745	-0.685529	-0.116219	-0.422148	-0.665065	0.341484	-0.0068653	-0.679289
GSM1523822	GSE62254	70.97	0	TMEcluster-C	-0.50801	0.811438	-1.2657	1.01438	-0.129839	-0.805419	0.682715	-0.740967	-0.226169	0.413871	-0.409017	-1.06142	-0.294533	-0.129021	0.568411	0.14346	-0.685529	-0.137044	-0.885724	0.278646	0.376033	2.75655	0.575202
GSM1523823	GSE62254	70.9	0	TMEcluster-C	-0.50801	1.21229	-0.852226	-0.692945	-0.129839	-0.897945	2.24304	0.299403	-0.226169	0.0456841	0.46741	-0.517575	-0.294533	-0.902235	1.39971	-0.525943	-0.685529	1.23645	-0.885724	0.623027	-0.285281	1.07399	0.12663
GSM1523824	GSE62254	70.67	0	TMEcluster-C	-0.50801	1.04094	-0.400768	-0.692945	-0.129839	-0.17092	1.91885	0.781387	-0.226169	-0.684006	-0.409017	0.801072	-0.294533	0.793677	1.3419	-0.38278	-0.562106	-0.401372	-0.885724	-0.133786	-0.759476	-0.770924	-0.203653
GSM1523825	GSE62254	4	1	TMEcluster-B	-0.50801	-0.160084	-1.67486	0.0666893	-0.129839	-0.366073	-0.999802	0.606044	-0.226169	-1.06356	0.943838	0.318868	-0.294533	-0.155974	-2.32207	2.0946	-0.685529	7.83699	-0.885724	-0.1037	-1.23338	0.124032	0.302641
GSM1523826	GSE62254	2.7	1	TMEcluster-A	1.72267	-1.04441	0.362168	-0.630361	-0.129839	0.267108	0.330128	-1.15344	-0.226169	0.813251	-0.409017	0.0320379	-0.294533	-0.0277855	0.623905	0.2952	-0.685529	-0.689006	-0.885724	-0.352435	1.44549	-0.142632	0.21236
GSM1523827	GSE62254	70.03	0	TMEcluster-A	-0.50801	1.46912	-0.0147481	0.160066	-0.129839	0.599297	-0.999802	1.74498	-0.226169	0.115004	-0.409017	-0.628491	-0.294533	-1.16685	-0.738617	-0.400911	-0.188235	0.233775	-0.748128	-0.0808332	-0.099497	0.439838	0.207374
GSM1523828	GSE62254	5.87	1	TMEcluster-B	-0.50801	-0.00591163	-0.00162816	-0.692945	-0.129839	0.91426	-0.999802	0.9044	-0.226169	-0.919009	-0.409017	-1.22403	-0.294533	-0.146874	-1.15395	-1.10347	-0.333198	0.508935	-0.885724	2.66816	1.18166	0.296796	1.04216
GSM1523829	GSE62254	69.83	0	TMEcluster-A	-0.50801	0.681593	0.384509	-0.692945	-0.129839	-0.73303	-0.383766	0.542497	-0.226169	0.259376	-0.409017	0.682103	-0.294533	-0.942447	0.975486	0.247617	1.57241	-0.607188	0.661444	-0.665065	-0.288663	0.2265	-0.703811
GSM1523830	GSE62254	53.43	1	TMEcluster-C	0.350829	-1.04441	0.0758824	0.574211	-0.129839	-0.931529	0.118685	0.720067	-0.226169	1.12775	-0.409017	-0.48332	-0.294533	0.175112	0.427488	0.978195	-0.443664	-0.526119	-0.733957	-0.481874	0.173788	0.328537	-1.11499
GSM1523831	GSE62254	30.9	1	TMEcluster-A	-0.50801	-0.619263	1.01863	-0.217984	-0.129839	0.563873	0.424874	-0.40327	-0.226169	-0.971367	-0.409017	1.64782	-0.294533	0.723489	0.295759	-0.858868	-0.0111154	-0.768165	0.618388	-0.665065	0.447529	-0.924823	-0.8693
GSM1523832	GSE62254	17.67	1	TMEcluster-A	0.808969	-0.754229	1.08013	-0.692945	-0.129839	1.3469	-0.0796118	-0.232544	-0.226169	0.383799	-0.409017	-0.188826	-0.294533	-0.29574	-0.688961	0.300597	-0.685529	-0.198882	-0.0991223	-0.665065	-0.625944	-0.441252	0.317134
GSM1523833	GSE62254	8.87	1	TMEcluster-B	-0.50801	0.248778	-0.0175903	-0.692945	-0.129839	0.225136	-0.999802	-0.0948856	-0.226169	0.199851	-0.409017	0.0508309	-0.294533	-0.220535	-0.890964	1.39718	-0.685529	0.3219	-0.885724	1.0946	0.339706	-0.0244343	-0.959142
GSM1523834	GSE62254	44.57	1	TMEcluster-B	-0.50801	1.0347	-0.867441	-0.692945	-0.129839	0.500845	-0.999802	0.475436	-0.226169	0.286624	-0.409017	-1.22403	-0.294533	-0.6472	-1.0772	-0.278898	0.46295	0.512195	-0.885724	1.27178	1.15715	1.03603	1.05604
GSM1523835	GSE62254	69.3	0	TMEcluster-B	1.25925	-1.04441	-0.668821	-0.692945	-0.129839	0.943343	-0.999802	0.526344	-0.226169	-1.06356	-0.409017	-0.2723	-0.294533	2.97282	-0.6459	0.440608	-0.388555	-0.546275	-0.885724	0.245852	-0.850324	-0.210321	1.08219
GSM1523836	GSE62254	69.23	0	TMEcluster-B	-0.0622356	-0.85097	-0.759547	-0.692945	-0.129839	1.18042	-0.6963	-0.402591	-0.226169	-0.242692	-0.409017	-0.783099	0.807486	0.187067	-0.409423	-1.35747	-0.685529	0.533152	-0.885724	1.70703	1.22751	1.61565	-0.118041
GSM1523837	GSE62254	26.83	1	TMEcluster-A	-0.50801	-0.61735	0.455691	-0.393782	-0.129839	0.732975	-0.0279799	1.16552	-0.226169	-0.913586	-0.409017	0.477626	-0.294533	0.383488	-0.722792	-1.25603	2.28983	-0.503317	-0.0324498	-0.665065	1.26941	-0.924347	-0.701784
GSM1523838	GSE62254	10.33	1	TMEcluster-C	-0.50801	1.86316	-1.05897	2.61867	-0.129839	-1.80748	0.537122	1.49731	-0.226169	-0.0244131	-0.409017	0.0827834	-0.294533	-0.473311	1.01479	-0.874361	-0.403439	0.140958	-0.885724	0.81203	-0.678771	0.836129	0.191114
GSM1523839	GSE62254	69.13	0	TMEcluster-B	1.11232	-1.04441	-0.378109	-0.692945	-0.129839	0.789545	-0.999802	-1.28651	-0.226169	-0.591408	-0.409017	-0.828614	0.0105859	2.00763	-2.03459	0.539961	-0.685529	0.0788155	-0.885724	0.404474	1.3882	1.44456	0.904465
GSM1523840	GSE62254	22.83	1	TMEcluster-A	-0.447372	-0.977552	0.178066	-0.692945	-0.129839	0.480189	0.157815	-0.102104	-0.226169	-0.308297	-0.409017	1.05945	-0.294533	0.961444	0.127049	-0.353487	-0.685529	-1.08526	0.346486	-0.665065	1.16089	0.0965244	-0.933921
GSM1523841	GSE62254	42.07	1	TMEcluster-A	-0.50801	0.44885	0.0707509	-0.174782	-0.129839	-0.197146	0.0328809	0.229806	-0.226169	-0.678416	-0.409017	-0.833155	-0.294533	-0.517087	0.129805	1.47946	1.6854	-0.104411	-0.548437	-0.568005	0.929375	-0.510595	-0.291906
GSM1523842	GSE62254	48.73	1	TMEcluster-A	1.11518	-1.04441	0.987573	0.216127	-0.129839	0.263254	-0.999802	1.52884	-0.226169	0.023257	-0.409017	1.09055	-0.294533	-0.689615	-0.306499	-0.236421	0.0754485	0.225808	-0.885724	0.055419	-0.141156	-1.01527	-0.451107
GSM1523843	GSE62254	25.87	1	TMEcluster-A	0.802864	-0.912106	0.157211	-0.436752	-0.129839	-0.167223	-0.444685	-0.613552	-0.226169	-0.595959	-0.409017	0.700608	-0.294533	-0.396892	-0.619636	0.19574	1.15449	-0.582936	2.79962	-0.665065	2.79574	-1.27473	0.309265
GSM1523844	GSE62254	68.9	0	TMEcluster-B	-0.50801	1.31715	-1.19248	-0.692945	-0.129839	0.523601	-0.429509	0.329933	0.277641	-1.06356	0.511429	-1.14269	-0.294533	-1.15562	0.048254	2.58319	-0.586052	-0.511832	-0.885724	1.22656	-1.23338	1.28982	1.36275
GSM1523845	GSE62254	9.67	1	TMEcluster-B	-0.50801	-0.101898	0.888531	-0.692945	-0.129839	0.499362	-0.999802	0.354315	-0.226169	-1.06356	-0.409017	-1.22403	-0.294533	-0.479942	0.341497	0.00860933	1.26664	-0.277007	-0.885724	1.87228	-0.272054	0.151388	0.375845
GSM1523846	GSE62254	68.37	0	TMEcluster-C	0.896853	-1.04441	0.500642	-0.103933	-0.129839	-1.37761	0.48593	0.904563	-0.226169	1.75054	-0.409017	0.0170166	0.461721	0.187735	0.666032	-0.0131931	-0.685529	-0.883705	0.919697	-0.665065	0.878121	-1.05566	0.532117
GSM1523847	GSE62254	68.13	0	TMEcluster-C	-0.50801	0.346934	-0.966865	-0.692945	-0.129839	-0.409974	-0.0154391	1.04813	-0.226169	-0.500406	-0.409017	2.38928	-0.294533	0.132466	1.43255	-0.000710642	-0.472772	0.868408	-0.471271	-0.665065	-0.66597	0.388318	-0.835997
GSM1523848	GSE62254	68.13	0	TMEcluster-C	-0.50801	1.77839	-0.315649	2.5451	-0.129839	-2.15467	1.79125	0.29747	-0.226169	2.7236	-0.409017	-0.745571	-0.294533	-1.06106	1.21069	-0.26437	1.40772	-0.631078	-0.493473	-0.627532	-0.995044	-0.377959	0.776662
GSM1523849	GSE62254	28.03	1	TMEcluster-B	-0.50801	-0.241164	-1.37682	-0.655151	-0.129839	0.5448	0.6943	-1.03843	-0.226169	-0.031797	-0.409017	-0.701214	-0.294533	1.93904	-0.417093	0.865322	-0.685529	0.0530355	-0.885724	-0.0411734	1.39881	0.00820391	1.58214
GSM1523850	GSE62254	36.4	1	TMEcluster-A	0.0543297	-1.04441	0.952653	1.746	-0.129839	0.423613	-0.999802	-0.95709	-0.226169	1.37921	-0.409017	0.183614	-0.294533	-1.16685	-0.670459	0.197829	1.36445	-0.637734	0.971394	-0.665065	1.22373	-1.57171	1.30031
GSM1523851	GSE62254	67.23	0	TMEcluster-B	-0.50801	1.60424	-0.879896	-0.692945	-0.129839	-1.29334	0.436019	-0.18073	-0.226169	-0.5419	-0.409017	0.602613	-0.294533	-0.176824	0.189588	-1.00726	-0.685529	2.98977	-0.885724	0.186888	1.25946	2.06415	-0.378999
GSM1523852	GSE62254	31	1	TMEcluster-B	-0.50801	3.50729	-0.87906	-0.692945	-0.129839	0.317206	-0.999802	0.872812	-0.226169	1.93322	0.128551	-1.18049	-0.294533	-0.456394	-0.472927	-1.94119	-0.485945	0.518401	-0.885724	1.80023	-0.119852	-0.47226	-0.648872
GSM1523853	GSE62254	66.73	0	TMEcluster-A	-0.50801	-0.644668	0.0292871	-0.692945	-0.129839	0.663508	0.566958	-0.334587	-0.226169	0.930753	-0.409017	1.75265	-0.294533	0.182362	-0.563671	0.158391	-0.685529	-0.486915	0.749341	-0.665065	0.260312	-1.09608	-0.65416
GSM1523854	GSE62254	66.73	0	TMEcluster-A	-0.50801	0.735223	0.678571	-0.692945	-0.129839	0.51954	-0.999802	0.724883	-0.226169	0.228558	-0.409017	0.643114	-0.294533	-1.16685	-0.035411	0.0937528	0.523373	0.860031	-0.885724	-0.0926951	-1.06263	0.0323613	0.186372
GSM1523855	GSE62254	21.93	1	TMEcluster-B	-0.50801	0.110833	0.290848	0.27818	-0.129839	0.1322	-0.33114	-0.334492	-0.226169	-1.06356	0.79379	-0.163245	1.48024	0.937762	-1.45342	-1.89532	0.0184033	0.770734	-0.885724	1.41249	0.557597	1.27099	-1.25162
GSM1523856	GSE62254	66.2	0	TMEcluster-C	0.606361	-1.04441	0.240916	1.76641	-0.129839	-1.54596	1.48691	0.557369	-0.226169	-0.468743	-0.409017	0.713082	-0.294533	0.462819	0.604236	-0.403707	-0.685529	0.00694777	0.275069	-0.665065	0.508004	-0.0277131	0.56363
GSM1523857	GSE62254	14.43	1	TMEcluster-A	-0.0422088	-0.826439	-0.675075	-0.37933	-0.129839	0.713451	-0.90835	-0.322034	-0.226169	-0.164643	-0.409017	0.217535	-0.294533	-1.16685	1.38587	1.23716	-0.685529	-0.81661	0.886591	-0.665065	0.530991	1.08612	1.23218
GSM1523858	GSE62254	17.1	1	TMEcluster-A	-0.50801	0.176209	-1.73074	0.147098	-0.129839	1.41509	-0.768164	-0.651994	-0.226169	1.28653	-0.409017	-0.788646	-0.294533	-1.16685	0.383039	1.49342	0.344021	-1.4807	3.15111	-0.665065	-0.454318	-0.891194	2.07656
GSM1523859	GSE62254	53.13	0	TMEcluster-B	-0.50801	-0.461855	1.3071	-0.254534	-0.129839	-0.950392	-0.107934	-1.42221	-0.226169	-0.0990669	-0.409017	-0.495575	-0.294533	0.901393	0.499577	-0.0465282	0.0774442	-0.417586	-0.885724	1.20706	1.60474	0.25659	-0.632352
GSM1523860	GSE62254	42.2	1	TMEcluster-C	-0.50801	-0.435522	-1.148	0.583496	-0.129839	-0.249886	0.410061	0.846992	-0.226169	-1.06356	-0.409017	2.62093	-0.294533	-1.16685	0.884271	-0.686274	-0.436259	2.09586	-0.885724	-0.20187	-0.965519	2.25766	0.0218223
GSM1523861	GSE62254	64.8	0	TMEcluster-B	-0.50801	-0.746223	-0.479191	-0.692945	-0.129839	0.432419	0.34473	-1.04347	-0.226169	-0.66995	2.30997	-0.352625	-0.294533	1.24712	0.301496	-0.602725	-0.685529	-0.585016	-0.885724	1.09245	1.49088	0.745797	-0.342943
GSM1523862	GSE62254	21	1	TMEcluster-A	0.582474	0.191908	-0.474405	-0.692945	-0.129839	1.3633	-0.580111	-0.710267	-0.226169	2.23981	-0.409017	-1.22403	-0.294533	-1.16685	0.857849	1.14462	0.533003	-1.3079	0.69771	-0.665065	-0.410972	-1.28047	1.66951
GSM1523863	GSE62254	64.57	0	TMEcluster-C	-0.50801	1.18952	-2.19786	3.60428	-0.129839	-2.15467	1.79634	1.68588	-0.226169	0.354841	0.485824	-0.113881	-0.294533	-1.16685	2.41787	-0.617589	0.882998	-0.138401	-0.885724	0.212889	-1.23338	0.933932	-0.699386
GSM1523864	GSE62254	63.97	0	TMEcluster-A	-0.50801	-0.821101	0.853752	-0.692945	-0.129839	2.10526	0.844415	-0.724734	-0.226169	-0.523999	-0.409017	0.675769	-0.294533	0.00735843	0.0938171	-0.0215174	-0.685529	-0.934773	-0.0693559	-0.665065	-0.700771	-0.745933	-0.738989
GSM1523865	GSE62254	63.7	0	TMEcluster-C	-0.50801	-1.04441	0.891624	0.442124	-0.129839	-0.380158	-0.00696641	0.456353	-0.226169	-0.649307	-0.409017	-0.00353689	-0.294533	1.09112	0.0507	1.73438	-0.685529	-1.4807	-0.33864	-0.665065	0.163651	-0.420913	0.223722
GSM1523866	GSE62254	4.37	1	TMEcluster-C	-0.50801	0.342343	1.04727	0.298611	-0.129839	-0.352358	-0.325817	1.21905	-0.226169	-0.510313	-0.409017	-0.14065	-0.294533	-0.380391	0.53033	0.0214579	0.0381569	-0.245905	-0.494537	-0.35028	-0.505425	0.0996612	1.20612
GSM1523867	GSE62254	33.27	1	TMEcluster-A	1.17897	-1.04441	0.508232	-0.692945	-0.129839	0.302784	0.506934	-0.38864	-0.226169	0.726918	-0.409017	-0.439187	-0.294533	-0.177748	-0.849907	-0.124891	-0.214242	-0.56985	0.0592812	-0.665065	1.67799	0.266338	-0.409836
GSM1523868	GSE62254	63.27	0	TMEcluster-C	-0.50801	-0.115229	-1.28631	1.23649	-0.129839	-1.39564	0.958287	-0.228376	-0.226169	1.01618	0.488962	-1.22403	-0.294533	-1.10079	0.257983	1.35994	-0.685529	1.29985	-0.821954	-0.665065	1.16912	2.17601	0.157223
GSM1523869	GSE62254	62.53	0	TMEcluster-B	-0.50801	0.52696	0.0675398	-0.282591	-0.129839	0.3118	-0.151644	-0.775389	-0.226169	-0.698119	-0.409017	-0.50419	-0.294533	1.44889	-0.390464	-0.694742	1.22387	-0.947403	-0.314397	-0.665065	1.79528	0.375928	-0.317219
GSM1523870	GSE62254	62.47	0	TMEcluster-C	-0.50801	0.319718	-0.572048	1.44966	-0.129839	-1.49091	3.12918	-0.259791	-0.226169	-0.212511	-0.409017	0.426528	-0.294533	-0.428425	1.73009	0.0662937	-0.384021	0.304627	0.0843002	-0.665065	0.13317	-0.26192	-0.526552
GSM1523871	GSE62254	62.37	0	TMEcluster-B	-0.50801	1.26441	-0.349071	-0.692945	-0.129839	0.945254	-0.999802	1.00997	-0.226169	-1.06356	2.80245	-0.643164	-0.294533	-0.615418	-1.02358	-0.324614	-0.685529	1.27003	-0.885724	1.98955	-0.290592	-0.553751	-0.241072
GSM1523872	GSE62254	15.03	1	TMEcluster-A	-0.50801	0.223768	-0.488915	-0.692945	-0.129839	-0.196005	-0.885188	-0.109757	-0.226169	1.07277	-0.409017	-0.660876	-0.294533	1.65863	-0.381126	1.07157	-0.142029	-0.968167	-0.474073	-0.538911	0.7978	0.19329	0.736212
GSM1523873	GSE62254	24.03	1	TMEcluster-C	3.6998	-1.04441	0.584204	1.07718	-0.129839	-2.09871	1.43563	1.28015	1.97322	1.64717	-0.409017	-1.03616	-0.294533	0.018677	0.610245	-1.00002	1.2408	-0.256857	-0.678423	-0.665065	-1.00025	-0.238885	-0.235433
GSM1523874	GSE62254	62.1	0	TMEcluster-B	-0.50801	-0.0592749	-1.08619	-0.692945	-0.129839	0.347974	-0.0717918	-0.395382	-0.226169	-0.877793	-0.409017	-0.543698	-0.294533	1.90399	0.56034	0.545851	-0.685529	0.569017	-0.885724	0.730886	-0.295161	0.349149	0.52389
GSM1523875	GSE62254	8.47	1	TMEcluster-B	-0.50801	-0.721272	-1.52646	-0.692945	-0.129839	0.36406	1.87001	0.174383	2.51153	-1.06356	-0.409017	0.227163	-0.294533	-0.49884	-0.0842729	0.524394	-0.685529	0.506896	-0.885724	2.48293	-0.158565	0.0740584	-0.946047
GSM1523876	GSE62254	61.9	0	TMEcluster-C	-0.50801	-0.116991	0.309149	-0.618696	-0.129839	-0.530492	1.81083	-0.670763	-0.226169	1.03995	-0.409017	-0.935532	-0.294533	0.0691729	0.0577797	0.331356	-0.685529	-0.48123	-0.885724	-0.128829	1.4542	0.454519	-0.653301
GSM1523877	GSE62254	13.1	1	TMEcluster-B	-0.50801	-1.04441	-1.72904	-0.692945	-0.129839	2.32224	-0.999802	-0.550733	1.12284	-1.06356	-0.409017	0.0415351	0.339651	-0.188748	-1.69807	1.05436	-0.685529	0.46442	-0.885724	2.52421	-1.23338	1.50959	-1.36018
GSM1523878	GSE62254	61.87	0	TMEcluster-A	0.985958	-1.04441	-0.108663	-0.692945	-0.129839	-0.203268	1.05942	-0.0573025	-0.226169	0.857765	-0.409017	-0.0525628	-0.294533	-1.03614	1.07337	-0.385584	1.44308	-0.819265	1.93438	-0.665065	0.235252	-0.440518	-0.632097
GSM1523879	GSE62254	61.17	0	TMEcluster-B	-0.50801	1.59933	-0.33416	-0.595189	-0.129839	1.21417	-0.999802	0.204495	-0.226169	0.235033	-0.409017	0.79564	-0.294533	1.08474	-1.01741	-1.80282	-0.141799	1.05153	-0.885724	0.59881	-1.23338	-0.165918	-0.361571
GSM1523880	GSE62254	60.97	0	TMEcluster-C	1.11771	-1.0291	-0.235502	1.62091	-0.129839	-0.541544	2.1392	-0.211248	-0.226169	0.661092	-0.409017	-0.718699	-0.294533	-0.724885	0.89562	0.437432	-0.685529	-0.823618	-0.231734	-0.665065	0.270601	0.114498	-0.894945
GSM1523881	GSE62254	14.9	1	TMEcluster-C	-0.50801	1.00794	-0.179031	1.5732	-0.129839	-0.702806	-0.319066	-0.967244	-0.226169	-1.06356	-0.409017	2.91945	-0.294533	0.523374	-0.420581	0.206775	-0.685529	-0.634447	0.982514	-0.665065	-0.4691	0.823119	-0.193661
GSM1523882	GSE62254	60.7	0	TMEcluster-C	-0.50801	-1.0291	-1.222	2.19971	-0.129839	-0.586719	2.25681	-0.0838289	-0.226169	0.260077	-0.409017	-0.473412	-0.294533	-0.565703	1.20975	-0.0157011	0.879106	-0.340101	-0.686171	-0.665065	1.40027	0.160508	-2.55036
GSM1523883	GSE62254	39.53	1	TMEcluster-C	-0.50801	-0.901697	-0.0368686	2.66171	-0.129839	-0.745612	2.30693	-0.226056	-0.226169	0.207613	-0.409017	-0.697291	-0.294533	-0.496861	1.89985	-0.395373	-0.573859	-0.553453	0.126	-0.665065	-0.20953	0.23509	-1.18974
GSM1523884	GSE62254	60.43	0	TMEcluster-A	-0.50801	1.21535	-0.214049	-0.692945	-0.129839	0.993636	-0.651969	-0.865031	-0.226169	-0.0244043	-0.409017	-0.38358	2.05635	0.161822	-0.613712	-0.0536174	-0.685529	-0.22861	1.09622	-0.390098	0.294133	-0.156361	0.500792
GSM1523885	GSE62254	60.23	0	TMEcluster-C	-0.474086	-0.295781	-1.95297	2.10059	-0.129839	-2.07195	2.21377	1.63977	-0.226169	1.00783	-0.409017	0.603833	-0.294533	-1.16685	1.00466	-0.741483	-0.685529	1.71028	-0.885724	-0.48848	0.144133	2.19671	-0.525147
GSM1523886	GSE62254	5.6	1	TMEcluster-B	-0.50801	-0.223943	-0.854752	-0.692945	-0.129839	-0.321369	0.906517	-1.15556	-0.226169	0.603743	-0.409017	-0.67733	-0.294533	1.05125	0.233056	-0.527859	-0.685529	0.519059	-0.885724	1.11506	0.935506	1.3855	1.72966
GSM1523887	GSE62254	60.2	0	TMEcluster-B	-0.50801	-0.262153	-0.234452	-0.692945	-0.129839	0.125777	1.35035	-0.138296	-0.226169	0.566526	0.951192	-1.18763	-0.294533	1.13058	1.47037	-0.454896	-0.523841	-0.430204	-0.885724	-0.407869	-0.708837	0.618165	0.290401
GSM1523888	GSE62254	59.9	0	TMEcluster-C	-0.50801	-0.697258	-1.32624	1.84862	-0.129839	-1.93247	2.63909	1.97685	-0.226169	1.59999	-0.409017	0.192309	-0.294533	-0.459451	1.91357	-0.473519	-0.298889	-0.271048	0.366463	-0.665065	-0.990092	0.154782	-0.0902471
GSM1523889	GSE62254	59.67	0	TMEcluster-A	0.334558	-0.753291	0.997862	0.0349667	-0.129839	1.2056	-0.999802	-0.390152	-0.226169	-0.907277	-0.409017	1.27654	0.855958	-0.540992	-0.253341	0.139203	-0.685529	0.619042	-0.270011	-0.0121142	-1.00984	-0.159801	-1.36597
GSM1523890	GSE62254	59.57	0	TMEcluster-A	0.480983	-1.04441	0.819999	-0.159415	-0.129839	0.682746	-0.999802	-0.134092	-0.226169	-0.748569	-0.409017	-0.737293	-0.294533	-0.00415406	-1.46745	0.271527	2.04668	-0.748996	-0.115001	-0.303373	1.91459	-0.125686	-0.208097
GSM1523891	GSE62254	59.57	0	TMEcluster-B	-0.50801	-0.153324	-1.02194	-0.692945	-0.129839	-0.301932	-0.39767	-1.67989	-0.226169	-0.803282	2.37127	-1.22403	-0.294533	2.37671	-1.74948	0.66439	-0.685529	0.238936	-0.885724	1.18894	1.45516	2.3613	1.22746
GSM1523892	GSE62254	59.47	0	TMEcluster-A	-0.50801	1.40656	0.0789861	-0.324922	-0.129839	0.111281	-0.804905	1.19385	-0.226169	-0.297613	-0.409017	1.577	-0.294533	-0.806618	0.717516	-0.992075	0.0414346	0.127116	1.16711	-0.665065	-0.0471444	-0.963374	0.175972
GSM1523893	GSE62254	20.1	1	TMEcluster-A	-0.50801	-0.184532	0.752942	0.541185	-0.129839	1.04051	0.286877	-0.82929	-0.226169	0.0348195	-0.409017	-0.809357	-0.294533	-0.187334	-0.728367	-1.24713	2.6648	-0.223312	-0.885724	-0.39434	0.310776	0.321967	-0.811723
GSM1523894	GSE62254	35.77	1	TMEcluster-C	-0.50801	0.436453	-0.216489	-0.692945	-0.129839	0.183653	0.659341	0.000422891	-0.226169	-0.385872	-0.409017	0.137415	-0.294533	0.108212	0.534281	0.401374	-0.685529	0.360302	-0.0691056	-0.665065	-1.10098	1.01525	-1.04617
GSM1523895	GSE62254	59.03	0	TMEcluster-C	-0.50801	-1.04441	-1.03365	1.82218	-0.129839	-0.923938	1.37784	1.44924	-0.226169	-1.06356	0.809169	0.687832	-0.294533	1.10665	1.6891	-0.339692	0.774997	-0.76658	-0.804351	-0.665065	-0.694771	0.250747	-1.32146
GSM1523896	GSE62254	28.03	1	TMEcluster-C	0.339823	-0.839549	-0.124564	1.02544	-0.129839	-0.651604	1.46811	-0.785115	-0.226169	0.743747	-0.409017	-0.656789	-0.294533	0.169686	1.25961	0.472591	0.61112	-1.4807	1.17594	-0.665065	0.597517	-1.13204	0.0723363
GSM1523897	GSE62254	58.87	0	TMEcluster-B	-0.50801	0.904544	-0.387631	-0.692945	-0.129839	-0.0775562	0.190702	0.414211	-0.226169	-0.559021	-0.409017	-0.556565	-0.294533	-1.16685	-0.878875	0.50499	0.329334	2.036	-0.885724	2.27537	-0.922759	0.289983	-1.33677
GSM1523898	GSE62254	58.83	0	TMEcluster-B	-0.50801	-1.04441	0.454818	-0.692945	-0.129839	0.455389	0.83977	-0.704926	-0.226169	0.963231	-0.409017	-0.579644	-0.294533	1.10223	-1.01214	-0.675426	-0.685529	-0.909157	-0.885724	0.710483	0.864085	0.819233	-0.598301
GSM1523899	GSE62254	58.07	0	TMEcluster-A	-0.50801	0.78302	-0.779449	-0.692945	-0.129839	1.27642	0.569266	-0.630284	-0.226169	1.53444	-0.409017	1.57495	-0.294533	-0.171962	0.230078	-1.7008	-0.0399534	0.677918	0.944707	-0.665065	-0.817689	-1.03347	-1.45619
GSM1523901	GSE62254	57.47	0	TMEcluster-C	-0.50801	-0.760239	-1.73158	0.911809	-0.129839	-1.37208	1.71283	-0.0888788	-0.226169	-0.134762	-0.409017	1.10028	-0.294533	0.850799	1.73727	0.133042	-0.685529	-0.405859	1.65099	-0.665065	1.14088	-0.226243	-0.314512
GSM1523903	GSE62254	39.8	1	TMEcluster-B	-0.50801	-1.04441	-1.24339	-0.692945	-0.129839	3.07425	0.278498	-0.890252	-0.226169	-1.06356	-0.377884	-0.0159118	-0.294533	1.03992	-0.00669313	0.270233	-0.685529	-0.050985	-0.885724	-0.356177	-0.710917	0.144699	0.470799
GSM1523904	GSE62254	55.37	0	TMEcluster-A	-0.50801	-0.0186245	-0.293553	-0.692945	-0.129839	0.408337	0.657353	-1.17865	-0.226169	0.717099	-0.409017	-0.0722913	-0.294533	-0.551566	0.0904181	0.476895	-0.203035	-0.955608	1.05624	-0.665065	1.85469	-0.11172	-0.361235
GSM1523905	GSE62254	55.3	0	TMEcluster-A	-0.488625	-0.476981	1.06799	-0.174801	-0.129839	0.521249	-0.264368	-1.62954	0.534932	-1.06356	2.79095	-1.22403	0.956017	-1.16685	-0.433862	-0.442793	2.84691	0.724189	0.545583	-0.665065	0.963585	0.721535	-0.473342
GSM1523906	GSE62254	55.3	0	TMEcluster-C	-0.50801	0.642869	0.148107	0.0389142	-0.129839	-0.863589	0.260413	1.93078	-0.226169	0.414425	-0.409017	-0.262508	-0.294533	-0.104151	1.52142	-0.603172	-0.023062	-0.337172	0.721767	-0.665065	-0.976071	-0.446808	0.230083
GSM1523908	GSE62254	55.07	0	TMEcluster-C	-0.50801	1.56596	-0.657216	-0.692945	-0.129839	-1.51605	1.18665	0.0383504	-0.226169	0.312826	-0.409017	1.13992	-0.294533	-1.16685	0.733727	0.379887	-0.199453	2.56845	0.139348	-0.665065	-0.546917	0.826143	0.283685
GSM1523909	GSE62254	54.53	0	TMEcluster-C	-0.50801	-0.439356	-0.985603	1.13471	-0.129839	-0.78331	2.07952	-1.11471	-0.226169	1.10216	-0.409017	1.38598	-0.294533	0.313952	1.38174	0.109038	-0.685529	-0.602394	-0.353622	-0.665065	0.653235	-0.10822	-0.238701
GSM1523910	GSE62254	54.33	0	TMEcluster-C	1.14168	-1.04441	-0.474968	0.764313	-0.129839	-1.38778	2.07091	1.23339	-0.226169	0.950857	-0.409017	-0.0445121	-0.294533	-0.504587	1.15905	-0.615049	-0.685529	0.99256	0.243943	-0.665065	-0.781314	0.392478	-1.37126
GSM1523911	GSE62254	21.83	1	TMEcluster-B	-0.50801	0.153225	-1.48519	-0.692945	-0.129839	-0.685218	-0.0299474	0.580262	-0.226169	0.288235	0.629042	0.658695	-0.294533	-0.256059	-0.139017	-0.408009	-0.685529	2.66269	-0.885724	2.74373	-0.683801	0.501384	-1.0965
GSM1523918	GSE62254	28.13	1	TMEcluster-A	-0.50801	0.573952	1.13554	0.0343276	-0.129839	0.478311	0.257806	-0.143802	-0.226169	-0.755072	-0.409017	0.314082	-0.294533	0.414586	0.0312807	0.212972	-0.685529	-0.91509	0.81214	-0.665065	-0.96076	-0.830331	1.54724
GSM1523919	GSE62254	84.1	0	TMEcluster-A	0.49439	0.505852	-0.465158	-0.692945	-0.129839	-0.206399	-0.673285	-0.492991	2.93836	1.89921	-0.409017	0.18933	-0.294533	-0.425643	0.600876	0.162336	0.0736725	-0.191752	1.99195	-0.665065	0.109131	-1.5237	-0.0796946
GSM1523920	GSE62254	9.33	1	TMEcluster-A	-0.50801	0.850703	-0.774066	-0.692945	-0.129839	-0.498836	-0.399545	0.263385	-0.226169	0.54394	-0.409017	-0.341644	-0.294533	-0.164543	-0.720511	1.05402	0.828261	-0.377573	1.15339	-0.665065	2.144	-0.751226	-0.628439
GSM1523921	GSE62254	83.3	0	TMEcluster-C	-0.50801	-0.0837205	-0.471556	0.517221	-0.129839	-1.54585	1.7552	-0.653789	-0.226169	-0.667906	-0.409017	0.988633	-0.294533	0.593739	1.79276	0.842171	-0.685529	-1.1963	1.5144	-0.665065	0.331147	0.0814016	0.210581
GSM1523922	GSE62254	23.6	1	TMEcluster-B	-0.50801	-1.04441	-2.26025	-0.692945	-0.129839	0.281858	-0.962026	-0.0373084	-0.226169	-0.561127	-0.409017	-0.029646	3.92664	1.15962	-0.105257	-1.71943	-0.685529	0.640827	-0.885724	2.57122	2.45729	1.64102	0.348955
GSM1523923	GSE62254	26.4	1	TMEcluster-B	0.551358	-1.04441	1.37877	-0.692945	-0.129839	0.254924	-0.999802	0.0769047	0.231039	0.276821	-0.409017	0.341345	-0.294533	0.901572	-1.04832	-0.195273	-0.685529	0.201395	-0.885724	0.249031	-1.11287	0.946974	-1.18387
GSM1523924	GSE62254	82.2	0	TMEcluster-A	-0.50801	0.933894	-0.432517	-0.559672	-0.129839	0.00285466	-0.827004	-0.829917	-0.226169	1.91222	-0.409017	-0.346757	-0.294533	-1.16685	-0.0545664	0.00622734	3.95906	-0.447239	0.516673	-0.665065	2.24378	-1.44451	0.439423
GSM1523925	GSE62254	6.3	1	TMEcluster-B	0.0457543	0.641887	0.523361	-0.205721	-0.129839	0.271107	-0.269158	-0.0551741	-0.226169	-1.06356	1.07203	-0.838106	0.246676	1.51432	-0.244158	0.450444	-0.0826696	0.464556	-0.885724	-0.417587	-0.815513	-0.664423	-0.959367
GSM1523926	GSE62254	69.03	0	TMEcluster-C	-0.50801	0.431447	1.97663	0.961566	-0.129839	-2.01264	-0.999802	0.846346	-0.226169	-1.06356	-0.409017	1.83658	-0.294533	1.24391	-1.97369	0.413308	-0.685529	2.15706	0.349288	-0.665065	-0.717405	-0.327256	-2.4749
GSM1523927	GSE62254	80.77	0	TMEcluster-A	0.815071	-1.04441	0.992694	-0.692945	-0.129839	1.02775	0.162611	-1.52749	-0.226169	-1.06356	-0.0993941	-1.03308	2.06387	-0.618417	-1.44876	1.34605	-0.685529	0.0169188	1.70159	-0.665065	1.34401	-0.494977	0.0666936
GSM1523928	GSE62254	54.13	1	TMEcluster-C	-0.50801	-0.0629891	-0.889063	-0.692945	-0.129839	0.482409	0.479569	-0.0577375	-0.226169	-1.06356	-0.409017	1.15769	-0.294533	-0.0377147	1.01725	-0.722055	1.90956	-1.10311	-0.885724	0.187948	0.499242	1.12205	-0.503748
GSM1523929	GSE62254	88.33	0	TMEcluster-C	-0.50801	0.0072733	0.0996355	1.71982	-0.129839	-1.00813	1.51396	-0.618952	-0.226169	0.0119716	-0.409017	0.848662	-0.294533	0.50852	0.568391	-0.287808	-0.550383	-0.115824	0.532248	-0.665065	-0.543469	0.104286	-0.429975
GSM1523930	GSE62254	78.53	0	TMEcluster-B	-0.50801	-1.04441	1.75885	0.159123	-0.129839	-0.987861	0.808663	0.579779	-0.226169	-1.06356	1.01005	-0.276171	-0.294533	2.97887	0.27141	-1.50158	-0.685529	0.135801	0.098605	-0.665065	0.0721574	-0.73051	0.987817
GSM1523931	GSE62254	77.6	0	TMEcluster-C	-0.50801	2.48539	-0.228345	1.17364	-0.129839	-2.15467	1.38781	1.86414	-0.226169	1.98655	-0.409017	-0.467707	-0.294533	-0.752411	0.596506	-0.396158	-0.312934	-0.228118	0.0103489	-0.665065	-1.23338	-0.067008	-0.529457
GSM1523932	GSE62254	12.67	1	TMEcluster-B	-0.50801	1.76858	0.273283	-0.0252703	-0.129839	-0.577991	-0.863818	1.11378	-0.226169	-1.06356	-0.409017	0.502859	-0.294533	0.325684	-0.537736	-0.612911	-0.685529	0.838685	-0.885724	1.16962	-0.432942	0.372663	-0.96627
GSM1523933	GSE62254	75.27	0	TMEcluster-B	-0.50801	-0.0900611	0.19356	0.866097	-0.129839	-0.696234	0.120568	-0.632555	-0.226169	-1.06356	0.98684	-0.689153	1.19763	1.59183	-0.359118	-1.24502	-0.685529	-0.00431275	-0.885724	3.11877	-0.896401	0.995499	0.159445
GSM1523934	GSE62254	12.8	1	TMEcluster-B	-0.50801	0.693563	1.39999	-0.692945	-0.129839	-0.333018	-0.999802	0.373483	-0.226169	-0.864889	0.33101	-0.229701	-0.294533	2.21611	-0.346604	-0.502941	-0.685529	-0.591955	0.193967	-0.665065	-0.570035	0.463611	-0.243263
GSM1523935	GSE62254	87.4	0	TMEcluster-B	-0.50801	-0.0508036	-0.729619	-0.692945	-0.129839	-0.406572	-0.299844	-0.489079	-0.226169	-1.06356	3.03525	-1.22403	-0.294533	2.53733	-1.76833	0.531897	-0.685529	0.785689	-0.885724	0.0775983	1.40288	1.53922	2.14034
GSM1523936	GSE62254	17.57	1	TMEcluster-A	-0.50801	1.08327	0.0283117	0.37981	-0.129839	0.0794063	-0.999802	-0.325649	-0.226169	-0.565922	-0.409017	-0.138601	-0.294533	-0.639413	-1.07849	0.0560139	3.03934	-0.777067	1.01298	-0.665065	1.36186	-0.0636129	0.866619
GSM1523937	GSE62254	19.67	1	TMEcluster-C	-0.50801	0.853991	-0.294961	0.973905	-0.129839	-1.21234	1.30478	-1.29596	-0.226169	0.147756	0.346832	-1.0398	-0.294533	0.12419	0.637129	-0.33663	-0.146177	-0.965271	0.068702	-0.665065	0.224095	3.15882	-0.50424
GSM1523938	GSE62254	5.77	1	TMEcluster-A	-0.50801	-0.385677	-0.5968	-0.692945	-0.129839	0.363095	-0.341553	0.0401092	-0.226169	0.899834	-0.409017	0.00250299	-0.20899	-0.623895	1.20287	1.93917	-0.272788	-1.4807	1.34601	-0.665065	0.51071	-1.35177	1.91366
GSM1523939	GSE62254	11.23	1	TMEcluster-A	-0.50801	1.13108	-0.160411	-0.554943	-0.129839	0.015899	-0.999802	0.141806	-0.226169	0.530397	-0.409017	-0.390241	0.888505	-1.16685	-0.279847	1.23875	0.759639	-0.571937	2.77364	-0.665065	0.390311	-1.51436	1.88563
GSM1523940	GSE62254	20.03	1	TMEcluster-C	-0.50801	1.28826	1.48718	2.92176	-0.129839	-1.11146	-0.61808	0.331925	-0.226169	-1.06356	-0.409017	-0.84929	-0.294533	1.81181	-0.216645	-0.356594	-0.685529	0.157403	-0.885724	-0.266228	-1.12771	-0.414326	-0.360093
GSM1523941	GSE62254	4.53	1	TMEcluster-C	-0.50801	-0.53861	-0.178365	2.03891	-0.129839	-1.69688	3.62059	-0.521616	-0.226169	1.05356	-0.409017	-0.216638	-0.294533	0.183134	0.604478	0.573742	-0.685529	-0.198734	0.656559	-0.665065	-0.139625	-1.04674	-0.0210446
GSM1523942	GSE62254	70.27	0	TMEcluster-B	-0.50801	-0.512696	1.13856	-0.550617	-0.129839	0.0894506	0.0961391	-1.34344	-0.226169	-1.06356	-0.409017	-0.126011	-0.294533	1.5192	-0.387327	-0.101914	-0.685529	-0.210103	0.518739	-0.665065	0.948016	0.805175	-0.0545387
GSM1523943	GSE62254	5.53	1	TMEcluster-B	-0.50801	0.624561	-0.654174	1.06057	-0.129839	-0.85546	0.285409	-0.472901	-0.226169	-0.920093	1.95672	-0.312189	-0.294533	0.953006	0.460807	-0.0962245	-0.134714	0.760224	-0.0284355	-0.665065	0.538104	0.61673	-0.879681
GSM1523944	GSE62254	69.63	0	TMEcluster-C	0.870653	-0.60023	0.793	1.15925	-0.129839	-0.401345	0.416307	1.13313	-0.226169	-0.408137	-0.409017	0.877198	-0.294533	0.000156799	1.24856	-1.47353	-0.565136	-0.102467	-0.841033	-0.665065	-0.886627	0.53817	-0.549295
GSM1523945	GSE62254	17.53	1	TMEcluster-B	-0.50801	-0.711469	-1.92201	-0.692945	-0.129839	0.989764	-0.458991	-1.67989	-0.226169	-1.06356	2.72524	-0.835077	0.719558	2.7149	-1.76358	0.0853314	-0.685529	0.609611	-0.885724	2.41852	0.310415	1.16538	1.72703
GSM1523946	GSE62254	68.93	0	TMEcluster-B	-0.442125	-1.04441	0.00194587	-0.646334	-0.129839	0.317945	-0.445918	-0.652193	0.980077	-0.47628	-0.409017	0.354729	-0.294533	0.856294	-0.29512	-0.208627	-0.685529	-0.250549	-0.885724	0.136873	-0.272933	3.12045	-1.20226
GSM1523947	GSE62254	68.43	0	TMEcluster-C	-0.50801	0.275652	-0.0958308	0.372489	-0.129839	-0.00428449	1.28382	0.598418	-0.226169	-0.209512	-0.409017	-0.219308	-0.294533	-0.0817812	0.0268592	-0.532403	-0.685529	-0.23822	-0.885724	0.265015	0.731765	-0.0683444	-1.21878
GSM1523948	GSE62254	27.47	1	TMEcluster-A	-0.50801	0.464781	-0.216874	0.402484	-0.129839	0.160174	-0.440192	-1.26638	-0.226169	0.453282	-0.409017	-1.22403	-0.294533	0.429316	-0.436071	0.934058	2.4286	-1.22531	-0.132017	-0.45182	0.476965	0.219174	0.985297
GSM1523949	GSE62254	10.1	1	TMEcluster-A	1.11465	0.0525612	-0.750833	-0.692945	-0.129839	1.08506	-0.999802	0.471047	-0.226169	1.75033	-0.409017	-0.848641	-0.294533	-1.16685	0.710432	-0.537265	1.8405	-0.35645	0.553271	-0.192276	-0.72264	-0.701006	1.36496
GSM1523950	GSE62254	68.2	0	TMEcluster-C	3.42978	-1.04441	-0.18194	2.88589	-0.129839	-1.43465	0.522379	1.00842	-0.226169	-1.06356	-0.409017	0.329639	-0.294533	-0.162761	0.393329	0.310198	-0.685529	0.786303	-0.885724	-0.483574	-1.23338	0.647269	-2.70106
GSM1523951	GSE62254	53.03	1	TMEcluster-C	-0.50801	1.25987	0.154731	1.33927	-0.129839	-0.658555	0.0998479	0.448195	-0.226169	0.897864	-0.409017	-0.0696963	-0.294533	1.10301	0.974822	-2.13754	0.710243	-0.682844	1.7068	-0.665065	-1.23338	-1.1133	-0.0135196
GSM1523952	GSE62254	100.87	0	TMEcluster-B	0.374333	0.257307	0.204381	-0.544325	-0.129839	0.427857	-0.999802	1.48688	-0.226169	1.4929	0.490625	-1.22403	-0.294533	-1.16685	-0.679996	-0.979647	-0.685529	1.07232	-0.885724	0.547807	-0.763119	1.12211	0.0388843
GSM1523953	GSE62254	84.77	0	TMEcluster-A	4.62988	-1.04441	1.74335	-0.692945	-0.129839	-0.486271	-0.999802	2.64558	-0.226169	-1.06356	-0.409017	2.04187	-0.294533	0.0434921	-1.94083	-2.51154	-0.685529	0.599231	4.23891	-0.665065	-1.23338	-1.78658	-1.81275
GSM1523954	GSE62254	100.87	0	TMEcluster-A	-0.50801	1.69378	2.28493	0.571791	-0.129839	2.49669	-0.999802	-1.47168	6.23175	-1.06356	-0.409017	2.15355	-0.294533	-0.743179	-1.96802	-1.81607	-0.685529	1.36971	-0.885724	-0.59226	-1.23338	-1.78658	-2.03997
GSM1523955	GSE62254	34.37	1	TMEcluster-A	-0.50801	1.95399	1.29041	-0.692945	-0.129839	1.95998	-0.623896	0.204818	-0.226169	1.17747	-0.409017	-0.592116	-0.294533	-1.10018	-0.638829	-1.2381	-0.685529	-0.702178	-0.0628729	-0.665065	0.164455	-1.48871	-0.404312
GSM1523956	GSE62254	31.13	1	TMEcluster-C	-0.50801	-0.559585	0.224758	-0.692945	-0.129839	-1.10207	1.2581	0.469347	-0.226169	-0.303842	-0.409017	1.24501	-0.294533	0.913738	1.10823	0.161574	-0.685529	1.70193	-0.885724	-0.645889	-1.23338	0.547977	-0.312458
GSM1523957	GSE62254	100.63	0	TMEcluster-A	-0.50801	-1.04441	3.6537	-0.692945	-0.129839	1.36962	-0.999802	-0.6297	0.584482	-1.06356	-0.409017	1.14543	-0.294533	-0.518522	1.24096	-1.72955	0.373519	0.162201	1.27102	-0.665065	-1.23338	-1.68835	-1.69209
GSM1523958	GSE62254	100.23	0	TMEcluster-C	-0.50801	-0.0541658	0.859102	-0.178257	-0.129839	-0.172298	-0.136566	1.65982	-0.226169	0.479774	-0.409017	0.275087	-0.294533	-1.16685	0.799727	-1.1133	-0.534875	1.42094	-0.100578	-0.141315	-1.01769	0.022836	0.211367
GSM1523959	GSE62254	17.43	1	TMEcluster-B	-0.50801	-1.04441	2.68875	-0.692945	2.99398	-0.762388	-0.999802	0.45368	-0.226169	-0.782336	-0.409017	0.99718	-0.294533	0.408414	-1.73285	-0.952018	0.848236	-0.120231	-0.885724	1.59404	0.430364	0.425282	-1.38127
GSM1523960	GSE62254	99	0	TMEcluster-B	-0.50801	4.86384	0.216738	0.401509	-0.129839	0.948476	-0.999802	-0.268298	0.322045	-1.06356	0.644676	-0.711139	-0.294533	0.637518	-1.41773	-2.09736	-0.574917	1.799	-0.885724	1.6666	-1.23338	-1.75219	-0.675112
GSM1523961	GSE62254	9.5	1	TMEcluster-C	-0.50801	-1.03216	1.30383	0.823326	-0.129839	-1.53645	-0.983096	2.2826	-0.226169	-1.06356	-0.409017	2.32211	-0.294533	0.60183	2.6284	-0.461076	-0.685529	0.989745	-0.60167	-0.665065	-1.23338	-0.778589	-0.980949
GSM1523962	GSE62254	20.13	1	TMEcluster-A	1.61398	-0.086537	0.408031	-0.13665	-0.129839	1.18854	-0.999802	-0.1171	-0.226169	0.489542	-0.409017	-0.893018	-0.294533	-1.16685	-1.21276	-0.873533	3.28735	-0.257686	0.102553	0.152174	0.0290496	-0.636046	1.69821
GSM1523963	GSE62254	45.77	1	TMEcluster-A	0.541111	-1.04441	0.785795	-0.0440708	-0.129839	0.186002	-0.999802	-1.11253	-0.226169	0.774548	-0.409017	-0.581426	-0.294533	-0.328736	-0.325565	1.45798	-0.119558	-0.398128	0.579385	-0.665065	-0.57543	1.06047	-0.544671
GSM1523964	GSE62254	98.53	0	TMEcluster-C	-0.50801	2.06321	-0.425239	-0.692945	-0.129839	0.900652	0.273832	-0.00580732	-0.226169	0.124598	-0.409017	-0.181073	-0.294533	0.0463025	1.53143	-0.822166	-0.685529	0.320848	0.0870813	-0.665065	-1.23338	-0.622751	-0.789724
GSM1523965	GSE62254	11.47	1	TMEcluster-B	-0.50801	1.20997	-0.933517	-0.692945	3.2136	-0.248456	-0.127468	-0.883934	-0.226169	-1.06356	4.36344	-1.22403	2.05149	-0.00522225	-1.16566	-0.732002	-0.685529	1.87239	-0.885724	2.26527	0.368149	1.43234	1.40067
GSM1523966	GSE62254	51.8	1	TMEcluster-C	1.56948	-0.183214	-0.0602691	0.22463	-0.129839	-0.915828	0.0188975	0.27226	-0.226169	0.254877	-0.409017	0.150612	-0.294533	-0.331538	0.993558	0.122984	2.18299	-1.07066	0.773002	-0.665065	1.08257	-1.44065	-0.664976
GSM1523967	GSE62254	98.47	0	TMEcluster-C	-0.50801	1.06597	1.20139	0.562399	-0.129839	0.432306	-0.999802	2.69658	-0.226169	-1.06356	0.102985	0.293563	0.585948	-0.54209	-0.118713	-1.65641	-0.458453	0.530135	-0.223817	-0.305053	-1.23338	-0.678916	-0.234864
GSM1523968	GSE62254	45.17	1	TMEcluster-A	-0.50801	-0.3326	-2.27414	0.720753	-0.129839	1.42167	-0.859072	-1.67989	-0.226169	0.805646	-0.409017	-1.22403	10.0985	-1.16685	0.365396	2.42536	2.02443	-1.04642	0.844164	-0.433645	0.134456	-1.78658	2.03771
GSM1523969	GSE62254	17.9	1	TMEcluster-A	-0.50801	2.64477	1.14598	0.387353	-0.129839	0.515673	-0.999802	0.0768588	-0.226169	1.09369	-0.409017	-1.17685	-0.294533	-1.16685	-0.88676	0.192095	0.353835	-0.911365	2.21803	-0.665065	-1.23338	-1.78658	1.1447
GSM1523970	GSE62254	15.7	1	TMEcluster-B	-0.230072	-0.934899	1.7564	-0.692945	13.1096	-0.824152	-0.999802	-0.428917	-0.226169	-1.06356	0.365434	-1.16822	-0.294533	-1.16685	-1.24013	0.645435	0.322906	-1.06733	-0.885724	3.77146	1.73081	0.0442777	-0.544587
GSM1523971	GSE62254	13.3	1	TMEcluster-A	5.04222	-0.472446	0.422056	-0.692945	-0.129839	1.21766	-0.999802	0.280107	-0.226169	0.270199	-0.409017	-0.518452	0.362023	-1.16685	-0.667864	-0.346144	0.350035	-0.154298	0.849362	-0.239446	-1.19513	-1.10374	1.11807
GSM1523972	GSE62254	6.5	1	TMEcluster-C	-0.50801	-0.695332	1.63432	1.63339	-0.129839	-2.04678	-0.999802	0.764072	-0.226169	-0.683487	-0.409017	0.76403	-0.294533	1.33269	0.104415	1.20632	0.328663	-0.0417121	-0.885724	-0.206358	-1.23338	0.257105	-0.919589
GSM1523973	GSE62254	87.27	0	TMEcluster-A	-0.256927	-1.04441	0.762353	-0.273985	-0.129839	0.344295	-0.302675	-1.37426	-0.226169	-0.756572	-0.409017	-0.418293	-0.294533	-0.413775	-1.04945	0.493785	0.121373	-0.788359	2.21253	-0.1113	1.90528	0.560232	-0.621552
GSM1523974	GSE62254	98.23	0	TMEcluster-B	1.71683	-1.04441	0.120972	-0.692945	-0.129839	1.73223	0.350451	0.782146	0.409209	-1.06356	-0.0900149	-0.761076	-0.294533	1.5219	0.521527	-2.51132	-0.0432581	-0.358451	-0.885724	1.1726	-1.15907	-0.805482	-1.39253
GSM1523975	GSE62254	7.2	1	TMEcluster-C	-0.50801	1.1876	-1.61276	0.303264	-0.129839	-1.29581	-0.233812	1.6921	-0.226169	2.69273	-0.409017	1.73126	-0.294533	-1.16685	2.49904	0.89295	-0.502085	-1.06614	0.974135	-0.665065	-1.23338	-1.371	1.543
GSM1523976	GSE62254	56	1	TMEcluster-A	2.37408	-1.04441	0.687167	-0.692945	-0.129839	1.17808	-0.999802	1.53663	-0.226169	-0.769046	-0.409017	2.77225	-0.294533	-0.920827	-0.0253074	-1.47254	-0.685529	0.86174	1.51536	-0.665065	-1.23338	-1.50254	-0.415834
GSM1523977	GSE62254	1	1	TMEcluster-B	-0.417953	-1.04441	2.07037	-0.692945	-0.129839	0.595703	-0.999802	0.114074	4.1309	-0.940936	-0.409017	1.41526	-0.294533	-0.106359	-2.01712	0.742308	-0.667143	0.955009	-0.885724	0.939168	-0.94336	-0.878605	-0.668794
GSM1523978	GSE62254	16.23	1	TMEcluster-B	1.15938	-1.04441	-0.541734	-0.692945	-0.129839	0.286384	-0.581669	0.457412	-0.226169	-0.251118	-0.409017	0.559652	-0.294533	0.21398	-0.00491116	-1.19364	-0.685529	-0.80601	-0.885724	2.04118	0.391763	1.59647	-0.840506
GSM1523979	GSE62254	9.43	1	TMEcluster-C	-0.50801	0.779221	-0.67175	-0.692945	-0.129839	-0.98711	2.21884	0.787394	-0.226169	0.488524	-0.409017	-0.206215	-0.294533	0.0242692	1.15259	-0.351922	-0.685529	1.44378	-0.505516	-0.665065	0.168578	-0.165489	-0.0600173
GSM1523980	GSE62254	6.7	1	TMEcluster-A	2.54129	0.198725	-0.320046	-0.692945	-0.129839	1.20369	-0.344528	-0.335597	-0.226169	1.70006	-0.409017	-1.22403	-0.294533	-1.05422	-0.614682	-0.68727	1.26025	-0.419773	0.242112	-0.113635	0.230937	-0.823174	0.693109
GSM1523981	GSE62254	97.2	0	TMEcluster-B	-0.50801	-0.449844	-1.14035	-0.692945	-0.129839	0.539309	0.501174	-1.48496	-0.226169	-0.876855	1.41351	-0.895116	-0.172328	0.654851	-0.103167	0.588998	-0.685529	0.376173	-0.885724	0.86472	1.5613	1.29074	2.07162
GSM1523982	GSE62254	8.7	1	TMEcluster-B	-0.50801	-0.0972299	-0.926172	-0.692945	-0.129839	-0.273417	-0.220795	-1.21605	-0.226169	0.203762	1.74763	-1.22403	2.4998	3.07056	-1.34748	0.970208	-0.685529	-0.990747	-0.885724	0.303497	-0.372056	1.86302	2.12911
GSM1523983	GSE62254	10.1	1	TMEcluster-C	-0.50801	3.07471	-0.166768	-0.665682	-0.129839	-1.16777	0.847942	1.17821	-0.226169	-0.0922282	-0.409017	0.300481	-0.0344486	-0.545536	0.288092	-1.01776	-0.685529	0.829684	-0.885724	-0.665065	0.362447	1.0864	0.237684
GSM1523984	GSE62254	96.97	0	TMEcluster-B	2.90199	-1.04441	1.19615	-0.692945	-0.129839	-0.64964	-0.268531	1.83351	-0.226169	-1.04915	-0.10454	-0.638901	-0.294533	-0.801539	0.588721	-0.632177	-0.685529	0.227222	-0.885724	0.906975	-0.714273	1.16697	-0.219802
GSM1523985	GSE62254	77.53	1	TMEcluster-B	0.475444	-0.801832	0.639656	-0.692945	-0.129839	-0.813852	0.818101	1.01959	-0.226169	-0.221666	2.85559	-0.151718	-0.294533	0.458556	0.728459	-0.498538	-0.685529	0.985277	0.264402	-0.665065	-1.23338	0.187439	0.406124
GSM1523986	GSE62254	86.8	0	TMEcluster-A	-0.50801	0.696591	0.167079	-0.692945	-0.129839	-1.04355	-0.631591	-0.383701	-0.226169	2.31959	-0.409017	0.437903	-0.294533	-0.267736	0.890038	0.656739	1.51781	-1.09577	1.61248	-0.665065	-0.273773	-1.08372	0.834167
GSM1523987	GSE62254	18.27	1	TMEcluster-B	0.321003	1.51707	1.21513	-0.692945	-0.129839	1.80092	-0.999802	-0.87891	3.53998	0.0143476	4.82789	-1.22403	0.684181	-1.16685	-1.43859	-1.15728	-0.685529	0.891847	-0.885724	1.19686	-0.633992	-1.51305	-0.229301
GSM1523988	GSE62254	14.83	1	TMEcluster-C	-0.206545	-0.0941669	-2.5727	1.45451	-0.129839	0.426362	-0.99646	1.11745	-0.226169	3.07534	-0.409017	-0.251682	-0.294533	-1.16685	2.52005	2.1227	-0.685529	-0.649534	-0.237938	-0.665065	-1.23338	-1.78658	2.30714
GSM1523989	GSE62254	86.7	0	TMEcluster-A	0.158428	0.071024	0.417774	-0.396128	-0.129839	-0.796116	-0.515427	-0.0667056	-0.226169	-0.077559	1.72468	-0.796972	-0.294533	-0.314219	0.482361	1.66309	-0.0330608	-0.865084	0.976682	-0.665065	1.38527	-0.814671	1.2318
GSM1523990	GSE62254	14.17	1	TMEcluster-A	-0.50801	0.574845	-0.435506	2.0288	8.53348	-1.31956	-0.999802	-1.20264	-0.226169	-1.06356	0.782579	-0.892745	-0.294533	1.16621	0.335874	1.99002	0.479764	0.384684	0.730606	0.0172815	-0.735772	-0.890518	1.6512
GSM1523991	GSE62254	95.2	0	TMEcluster-C	-0.50801	-1.04441	0.800684	3.53957	-0.129839	-1.25211	0.620503	0.0153766	-0.226169	-0.091154	-0.409017	2.10067	-0.294533	-1.10375	0.513231	-1.0586	1.75456	-0.652041	3.13003	-0.665065	-0.408279	-1.78658	0.713336
GSM1523992	GSE62254	20.13	1	TMEcluster-A	-0.50801	0.140719	1.15588	1.46902	-0.129839	0.160811	-0.999802	-0.876505	0.0318756	-0.954627	-0.409017	1.13554	-0.294533	-1.1314	0.51553	1.87994	1.79713	-1.41422	1.55259	-0.665065	-1.23338	-1.65693	0.0634904
GSM1523993	GSE62254	68.13	1	TMEcluster-A	1.79714	-1.04441	0.00729164	-0.692945	-0.129839	1.11474	1.59666	-1.02388	-0.226169	0.314243	0.293741	-0.451568	-0.294533	-0.921962	0.816697	-0.376734	-0.479976	-0.793033	0.900297	-0.665065	0.831261	-0.746648	-0.118599
GSM1523994	GSE62254	86.37	0	TMEcluster-A	1.2486	-0.958615	1.20251	-0.692945	-0.129839	-0.171317	-0.432945	-0.497859	1.0397	0.92538	-0.409017	0.0889565	-0.294533	-0.502871	-0.146348	0.379162	0.608287	-0.405082	1.70549	-0.665065	0.247487	-1.30513	0.381086
GSM1523995	GSE62254	6.37	1	TMEcluster-B	-0.50801	0.791755	-0.773587	-0.692945	-0.129839	0.931313	-0.372532	-0.255217	-0.226169	-0.745257	0.0753539	-0.00715798	-0.294533	2.42462	2.54427	-0.922228	-0.685529	0.394587	-0.885724	-0.665065	-1.23338	-0.584277	-0.236292
GSM1523996	GSE62254	35.2	1	TMEcluster-A	-0.50801	1.53281	-0.527985	-0.692945	-0.129839	0.809255	-0.999802	-1.67989	-0.226169	2.0517	-0.409017	0.253242	-0.294533	-1.16685	-0.503718	0.972259	-0.05237	0.594318	-0.885724	0.788218	-1.07585	0.495975	0.675833
GSM1523997	GSE62254	25.2	1	TMEcluster-C	-0.50801	-0.125982	0.792255	-0.692945	-0.129839	-0.85914	1.27255	-0.706182	-0.226169	-0.825808	-0.276602	-0.251064	-0.294533	1.44486	0.500912	0.240977	-0.685529	-0.17878	1.21398	-0.665065	-0.524855	0.543915	-0.0702186
GSM1523998	GSE62254	21.23	1	TMEcluster-A	-0.50801	0.451464	0.740128	-0.692945	-0.129839	2.03447	-0.999802	-1.12294	3.84376	-1.06356	0.61603	-0.123586	-0.294533	-1.16685	-0.3863	1.06431	-0.685529	-0.823645	-0.378516	0.280851	-1.06471	0.287197	-1.16746
GSM1523999	GSE62254	93.87	0	TMEcluster-B	-0.50801	0.0958127	-0.293685	-0.15318	-0.129839	2.57881	-0.999802	-1.30262	7.13301	-1.06356	2.24817	-0.250534	1.69547	-0.570673	-2.37236	-0.304066	-0.685529	2.49311	-0.885724	1.59116	-1.23338	-1.21627	-1.09575
GSM1524000	GSE62254	93.87	0	TMEcluster-A	-0.50801	1.4741	0.666103	-0.692945	-0.129839	0.0887817	-0.999802	0.435744	-0.226169	-0.0557803	0.203921	0.53352	-0.294533	-1.02736	-0.543627	-0.219572	0.804897	-0.156841	-0.0447933	-0.259675	-1.23338	1.47818	0.820518
GSM1524001	GSE62254	93.63	0	TMEcluster-A	2.37171	-1.04441	0.75857	-0.692945	-0.129839	-0.459778	-0.224451	1.02043	-0.226169	-0.259886	-0.409017	1.84716	-0.294533	1.04664	0.0321289	-0.344541	-0.685529	-0.4612	1.24582	-0.665065	-0.982305	-1.28869	-0.772029
GSM1524002	GSE62254	86.13	0	TMEcluster-C	-0.50801	-1.04441	0.575539	0.0196758	-0.129839	-1.95251	1.95457	2.45335	-0.226169	1.57915	-0.409017	0.748391	-0.294533	-1.16685	0.932111	-1.02065	-0.685529	0.576532	0.406566	-0.665065	-0.608163	0.739622	-1.1405
GSM1524003	GSE62254	85.93	0	TMEcluster-A	-0.50801	-1.04441	2.02068	-0.692945	-0.129839	1.42922	-0.999802	-1.09021	0.573687	-1.06356	-0.409017	1.409	-0.294533	-1.16685	-1.18969	1.86885	2.041	-1.33061	0.586348	-0.665065	-0.375359	-1.0006	-1.42203
GSM1524004	GSE62254	5.93	1	TMEcluster-A	1.61039	-1.04441	0.432064	-0.692945	-0.129839	0.679498	-0.744106	0.240363	-0.226169	0.392292	-0.409017	0.751813	-0.294533	-1.16685	-0.125209	-0.153544	-0.431965	-0.0548356	1.15611	-0.665065	0.703176	-0.430229	-0.332704
GSM1524005	GSE62254	9.47	1	TMEcluster-A	-0.313715	-1.04441	1.53195	-0.692945	-0.129839	0.643845	0.113719	0.218959	-0.226169	0.341705	-0.409017	0.739518	-0.294533	0.269256	-0.3175	0.561411	-0.685529	-0.594196	0.33045	-0.665065	-1.23338	-0.913906	-0.83802
GSM1524006	GSE62254	26.27	1	TMEcluster-A	-0.50801	1.35997	-1.97515	-0.692945	-0.129839	1.51714	-0.666324	-0.868577	-0.226169	2.34291	-0.409017	-0.805142	-0.294533	-1.16685	-0.274817	0.881689	2.35348	-0.872945	2.26621	-0.665065	-0.681707	-1.35258	2.11085
GSM1524007	GSE62254	10.37	1	TMEcluster-A	2.37595	-0.612503	0.750679	-0.692945	-0.129839	0.604835	-0.999802	2.51776	-0.226169	-0.560499	-0.409017	1.41292	0.691985	-0.882918	-0.436781	-1.42155	-0.121316	0.14664	-0.885724	0.818061	-1.16316	-0.611361	-0.151306
GSM1524008	GSE62254	10.83	1	TMEcluster-B	-0.50801	0.817256	-1.04354	-0.692945	0.666951	-1.57999	0.2129	0.414951	-0.226169	0.320637	-0.409017	-0.980837	-0.294533	0.173796	0.240355	0.381774	0.234469	3.34143	-0.885724	-0.00306539	0.0434533	1.45123	-1.12982
GSM1524009	GSE62254	65	1	TMEcluster-A	-0.50801	1.49392	-0.13018	-0.692945	-0.129839	1.46943	-0.451277	-0.575846	-0.226169	0.451779	-0.409017	-1.15915	-0.294533	0.0173527	-0.457823	-0.893541	1.6402	-0.191501	0.11095	-0.665065	1.06896	-1.13037	1.19826
GSM1524010	GSE62254	19.7	1	TMEcluster-A	2.07122	0.998172	-0.824083	-0.692945	-0.129839	0.602042	-0.693777	-0.44245	-0.226169	2.6862	-0.409017	-1.22403	-0.294533	-1.16685	-0.634319	0.233846	1.15393	-1.4807	0.679967	-0.388344	1.70695	-1.4514	1.11224
GSM1524011	GSE62254	90.2	0	TMEcluster-B	1.63552	-1.04441	1.62711	-0.692945	-0.129839	1.68907	-0.999802	0.27558	-0.226169	-1.06356	-0.146553	0.974884	-0.294533	0.437902	-1.57287	-1.67597	-0.361852	1.02521	-0.630852	0.262742	-1.23338	-0.0775706	-1.6424
GSM1524012	GSE62254	85.23	0	TMEcluster-B	0.174622	0.0905539	0.107967	-0.692945	-0.129839	0.0326068	0.124141	0.723507	-0.226169	-1.06356	-0.357129	-0.214836	-0.294533	0.644361	-0.0317917	-1.41099	-0.653353	-0.0601272	-0.885724	0.500733	0.751042	1.60191	-0.955809
GSM1524013	GSE62254	89.9	0	TMEcluster-B	-0.50801	-0.163506	0.496281	-0.692945	-0.129839	0.00873041	0.484615	-0.777397	-0.226169	-0.256465	-0.409017	0.1583	-0.294533	1.78644	0.750967	0.476042	-0.685529	-1.02883	-0.885724	-0.665065	-0.189306	0.455615	-0.0970963
GSM1524014	GSE62254	11.33	1	TMEcluster-C	-0.332511	-1.04441	-0.49135	0.971035	-0.129839	-0.0478566	-0.999802	2.94477	-0.226169	-0.501713	-0.409017	1.58365	-0.294533	-1.16685	-0.448779	1.86588	0.0217002	0.876304	0.44493	-0.665065	-1.23338	-1.4688	-0.60633
GSM1524015	GSE62254	24.87	1	TMEcluster-B	-0.50801	2.72713	1.35586	-0.692945	-0.129839	-0.347435	-0.999802	2.20746	7.68779	0.538988	-0.409017	-0.538985	-0.294533	0.963451	-2.15884	-2.64072	0.592206	0.575276	-0.885724	0.992808	-1.23338	-1.78658	-0.929439
GSM1524016	GSE62254	27.8	1	TMEcluster-A	-0.50801	2.41961	-0.0925329	-0.692945	-0.129839	0.983578	-0.999802	1.7408	-0.226169	0.582539	-0.409017	-0.584763	-0.0770423	-1.16685	-1.15799	-1.09367	0.8979	1.27935	-0.885724	0.274864	-0.563064	-0.851823	-0.786991
GSM1524017	GSE62254	85.03	0	TMEcluster-C	-0.298425	-0.0350292	-0.262712	0.199035	-0.129839	-0.922312	0.990851	1.15211	-0.226169	-0.342909	-0.409017	0.539395	-0.294533	-0.4925	1.19185	0.182434	-0.685529	-0.302578	0.555562	-0.665065	-0.672349	0.954313	-0.531569
GSM1524018	GSE62254	84.77	0	TMEcluster-B	0.0564415	-1.04441	0.457648	0.102557	-0.129839	0.879202	0.445646	-0.327548	-0.226169	-0.875877	-0.367506	-0.367512	1.53464	1.10764	0.0387704	0.776546	-0.685529	-0.384623	-0.425939	-0.665065	-1.23338	-0.134494	-1.89202
GSM1524019	GSE62254	8.33	1	TMEcluster-B	-0.283967	-0.0220026	1.38889	-0.692945	-0.129839	0.929077	-0.999802	0.808096	-0.226169	-0.000644022	-0.409017	-0.805698	-0.294533	-0.957074	-1.4131	-0.49421	0.240209	0.321621	-0.885724	1.38874	-1.22369	0.81426	-0.00614735
GSM1524020	GSE62254	84.3	0	TMEcluster-B	2.17847	-0.245553	0.747299	-0.692945	-0.129839	1.04291	-0.999802	1.18757	-0.226169	-1.06356	2.30042	-1.22403	1.72395	-0.837609	-0.858237	-1.13167	-0.685529	0.77227	-0.885724	1.33563	-0.406224	-0.233869	-0.017139
GSM1524021	GSE62254	12.93	1	TMEcluster-A	-0.342562	-0.0425694	0.272877	-0.692945	-0.129839	0.340347	-0.331635	-0.769413	-0.226169	-0.0702104	-0.409017	-0.235273	-0.294533	0.14545	0.0497152	0.229252	-0.685529	-0.0827449	1.81083	-0.665065	-0.155523	0.582625	0.560385
GSM1524022	GSE62254	8.03	1	TMEcluster-A	2.60889	0.559609	-1.75889	-0.692945	1.49346	-0.59947	-0.753346	1.00895	-0.226169	1.00717	-0.409017	0.146769	-0.294533	-1.16685	1.50716	1.3991	0.308059	-0.450111	0.138893	-0.665065	0.919876	-1.106	1.34885
GSM1524023	GSE62254	83.83	0	TMEcluster-C	-0.50801	-0.601751	0.773103	1.81143	-0.129839	-0.802713	0.924647	0.620671	-0.226169	0.116292	-0.409017	0.0508247	-0.294533	0.665833	0.419168	-0.614912	-0.685529	0.271796	0.62872	-0.665065	-1.23338	-0.472649	-0.509074
GSM1524024	GSE62254	89.43	1	TMEcluster-A	-0.50801	0.176592	1.04142	-0.692945	-0.129839	1.91909	-0.999802	-1.67989	-0.226169	0.229795	-0.409017	-0.38769	-0.294533	1.24977	-0.762201	0.226693	-0.685529	-0.477838	-0.251983	-0.208291	-1.23338	-0.276223	0.0415873
GSM1524025	GSE62254	81.83	1	TMEcluster-B	-0.50801	1.39803	-0.950336	-0.692945	-0.129839	-0.915244	-0.397705	1.58388	-0.226169	-1.00682	0.709036	0.146927	1.00525	-0.281394	0.257002	-0.410276	-0.685529	2.54068	-0.885724	1.15489	-1.23338	1.37392	0.854058
GSM1524026	GSE62254	83.6	0	TMEcluster-A	0.434873	-1.04441	0.95531	-0.574511	-0.129839	-0.0825662	0.115654	-0.166325	-0.226169	-1.06356	-0.409017	0.71773	2.48826	-0.214632	1.15612	-0.402799	1.51932	-0.343889	0.684548	-0.665065	-0.115577	-0.390853	1.51546
GSM1524027	GSE62254	59.7	1	TMEcluster-A	-0.50801	1.35437	0.597138	-0.692945	-0.129839	0.673841	-0.999802	-0.53455	-0.226169	-0.745558	-0.409017	1.49452	0.0297981	-0.33182	-0.848077	0.434913	0.0387697	-0.181879	0.308161	-0.665065	-0.657733	0.47966	-0.0723185
GSM1524028	GSE62254	47.7	1	TMEcluster-A	-0.275435	-0.215217	0.877605	0.284911	-0.129839	0.491196	0.596248	-0.641429	-0.226169	-0.570586	-0.409017	0.136291	-0.294533	0.181685	-0.685147	-0.898873	0.333504	-0.248489	0.887878	-0.665065	0.631738	-0.197965	-0.956775
GSM1524029	GSE62254	31.1	1	TMEcluster-A	2.22834	-1.04441	1.46099	2.78001	-0.129839	0.408776	-0.999802	0.67699	-0.226169	0.0962504	-0.409017	-1.22403	1.55708	-1.16685	0.585331	0.120714	-0.662546	-1.4807	1.33136	-0.665065	-1.16963	-1.72151	1.43818
GSM1524030	GSE62254	31.33	1	TMEcluster-A	0.533754	1.51809	-1.7061	-0.692945	-0.129839	1.51434	-0.360668	-0.738572	-0.226169	1.75396	-0.409017	-1.22403	-0.294533	-1.16685	-0.604715	0.688097	-0.685529	-0.345882	1.55148	-0.665065	1.46617	-1.26867	1.8334
GSM1524031	GSE62254	82	0	TMEcluster-B	-0.50801	-0.532325	-0.0367061	-0.692945	-0.129839	0.90651	0.89168	-1.40026	-0.226169	-1.06356	3.19482	-0.257839	-0.294533	1.65627	-0.389825	-0.204194	-0.685529	0.846565	-0.885724	0.890497	-1.18827	0.13087	-0.316043
GSM1524032	GSE62254	77.2	1	TMEcluster-B	-0.50801	0.439375	-0.331889	-0.692945	-0.129839	0.525561	-0.999802	-1.63281	-0.226169	-1.02284	2.16089	-1.22403	-0.294533	2.02983	-0.954573	-1.14757	-0.685529	-0.469232	-0.885724	3.64593	-0.103574	1.49939	0.998274
GSM1524033	GSE62254	80.83	0	TMEcluster-C	2.18609	-0.83722	0.588541	-0.692945	-0.129839	-1.20246	2.02477	0.299088	-0.226169	-0.0393158	3.44229	0.201037	-0.294533	-0.161619	0.866954	-0.830841	-0.648756	1.08225	1.09191	-0.665065	-1.23338	-0.412137	-0.581082
GSM1524034	GSE62254	44.07	1	TMEcluster-A	1.35806	-0.675147	-0.057389	-0.692945	-0.129839	1.39095	-0.999802	-0.401906	-0.226169	1.13893	-0.409017	-0.921634	0.0178604	-0.874606	-0.785171	-0.695318	1.85472	-0.556214	0.850712	-0.316746	1.50919	-0.906149	0.393262
GSM1524035	GSE62254	80.3	0	TMEcluster-A	1.17151	-1.04441	-0.121598	-0.0392728	-0.129839	-0.131632	0.25295	-0.792275	-0.226169	1.42417	-0.409017	-0.258455	-0.294533	-1.16685	0.888957	1.39497	0.726188	-1.3936	1.65429	-0.665065	0.571975	-1.17233	1.42194
GSM1524036	GSE62254	79.93	0	TMEcluster-A	-0.50801	-1.04135	0.938521	-0.692945	-0.129839	0.657203	-0.999802	-0.695407	-0.226169	-0.872352	-0.409017	1.41262	-0.294533	1.08158	-0.22446	0.476574	1.04184	-0.222059	1.5125	-0.665065	-1.23338	-0.704423	0.348509
GSM1524037	GSE62254	23.43	1	TMEcluster-B	-0.50801	0.3129	0.650431	-0.692945	-0.129839	0.309759	-0.999802	-0.395415	-0.226169	-0.854392	-0.409017	-1.21594	-0.294533	1.10123	-0.773836	0.695304	1.00744	-1.4807	-0.885724	1.18536	0.807842	0.0705981	1.24595
GSM1524038	GSE62254	8.63	1	TMEcluster-B	-0.50801	-0.163932	-1.83726	-0.692945	-0.129839	0.234421	-0.353213	0.038377	-0.226169	0.449771	-0.409017	0.185879	1.59406	0.793624	-0.729523	-1.10973	-0.685529	1.30217	-0.885724	2.86589	-0.0561057	0.827726	0.52274
GSM1524039	GSE62254	12.07	1	TMEcluster-B	-0.50801	-0.523238	-0.880116	-0.692945	-0.129839	0.23922	-0.999802	-1.48477	-0.226169	-1.06356	3.16983	-1.22403	4.58507	1.85198	-1.73894	-0.691045	-0.585415	0.481802	-0.885724	2.98397	1.40988	1.09082	1.89443
GSM1524040	GSE62254	36.17	1	TMEcluster-B	-0.50801	0.41283	-0.56643	-0.692945	-0.129839	0.478089	-0.999802	-0.614455	0.754555	1.09963	-0.409017	-0.520018	-0.294533	-1.16685	-0.118732	-0.834349	-0.126158	-0.235361	-0.885724	1.70034	1.64115	1.54041	-0.498746
GSM1524041	GSE62254	77.33	0	TMEcluster-B	-0.50801	0.381821	-0.7787	1.04983	-0.129839	-0.838725	-0.190083	-0.62043	-0.226169	-1.06356	-0.409017	2.12298	-0.233431	0.638123	-0.733674	0.578995	-0.685529	1.672	-0.885724	1.27581	0.194591	-0.0567873	0.815379
GSM1524042	GSE62254	10.83	1	TMEcluster-B	2.32156	-1.04441	0.8149	-0.692945	-0.129839	0.296299	0.27918	1.65684	-0.226169	-0.407277	-0.409017	-1.22403	-0.294533	-0.43419	-1.01405	-2.74118	-0.685529	1.01415	-0.885724	2.52808	-1.17387	1.52861	0.304145
GSM1524043	GSE62254	16.83	1	TMEcluster-C	-0.50801	-0.654971	-0.685369	-0.692945	-0.129839	-0.71098	1.14903	2.00188	-0.226169	0.971724	0.942463	-0.13114	-0.294533	-0.551873	1.40219	1.14264	-0.283566	0.0861779	0.12382	-0.665065	-0.391161	-1.30407	-0.313179
GSM1524044	GSE62254	22.87	1	TMEcluster-A	-0.50801	-0.54652	0.961979	-0.692945	-0.129839	0.137025	0.576583	-0.177269	-0.226169	0.318934	-0.409017	-0.240149	-0.294533	1.48358	0.212882	-0.219874	-0.143066	-0.367168	0.593023	-0.665065	-0.69557	-0.92787	0.761952
GSM1524045	GSE62254	89.13	0	TMEcluster-A	-0.50801	3.55774	0.652693	-0.692945	-0.129839	-0.0763139	-0.482079	0.834159	-0.226169	0.0160064	-0.409017	-0.885038	-0.294533	-0.851303	0.209209	-0.50776	0.354385	0.343949	0.499521	-0.665065	-0.651893	-0.885887	-1.41048
GSM1524046	GSE62254	88.03	0	TMEcluster-A	-0.0826132	1.88599	0.720892	-0.692945	-0.129839	-0.306008	-0.999802	2.19687	-0.226169	-0.462293	-0.409017	-0.471972	-0.294533	-0.650496	-0.209267	-0.796216	1.18279	-0.573207	-0.25455	-0.111296	-0.757227	0.561605	1.13562
GSM1524047	GSE62254	69.87	0	TMEcluster-A	0.0839333	-1.04441	1.50802	1.47609	-0.129839	-0.592838	-0.772866	-0.0584845	-0.226169	-1.06356	-0.409017	-0.204972	-0.294533	-0.127743	-0.841831	0.639887	1.99535	-0.630791	-0.0193384	-0.665065	0.0535344	0.866331	-0.83836
GSM1524048	GSE62254	46.8	1	TMEcluster-C	-0.50801	-1.04441	-0.755717	1.96097	-0.129839	-0.176814	0.52527	-0.434569	-0.226169	-0.0803776	-0.409017	-0.0493468	-0.294533	1.67	0.54583	1.31821	-0.521735	-1.4807	0.0466101	-0.665065	-0.0687169	-0.642939	1.23789
GSM1524049	GSE62254	87.8	0	TMEcluster-C	-0.50801	0.276395	-0.175471	1.78272	-0.129839	-1.61802	1.0556	-0.858291	-0.0532904	-1.06356	-0.409017	1.59442	-0.294533	0.361714	0.568648	1.19001	-0.685529	-0.632001	2.18098	-0.665065	-0.408087	-0.221745	1.40627
GSM1524050	GSE62254	57.13	1	TMEcluster-B	-0.50801	1.14014	1.23053	-0.159926	-0.129839	0.0724648	-0.999802	-1.218	2.57761	-1.06356	-0.409017	0.29127	-0.294533	0.592931	-1.18965	0.420726	-0.621494	0.366735	-0.885724	1.31369	0.325824	-0.665556	-1.19888
GSM1524051	GSE62254	87.27	0	TMEcluster-A	0.822931	-1.04441	0.530415	-0.692945	-0.129839	0.371248	0.398578	-0.404579	-0.226169	1.20616	-0.409017	-0.657348	-0.294533	-0.23778	0.445422	0.0235711	-0.685529	0.185574	0.049119	-0.665065	0.229862	-0.13422	0.000243745
GSM1524052	GSE62254	13.17	1	TMEcluster-A	-0.0924247	-1.04441	-1.77982	-0.437716	-0.129839	0.853189	-0.999802	-0.593917	-0.226169	0.990849	-0.409017	0.249763	-0.294533	-0.959563	-0.39379	4.40786	-0.257447	-0.99219	1.57861	-0.665065	-0.591412	-0.540457	1.05652
GSM1524053	GSE62254	86.93	0	TMEcluster-C	-0.50801	0.225431	0.0249184	1.81015	-0.129839	-1.14146	0.137601	-0.346755	-0.226169	-0.63772	-0.409017	0.784039	-0.294533	-0.828638	0.293201	0.491262	2.4965	0.936067	0.916903	-0.665065	-0.638595	-0.247808	-0.0691229
GSM1524054	GSE62254	86.57	0	TMEcluster-C	-0.50801	-1.04441	-0.610843	-0.692945	-0.129839	1.15822	1.53687	-0.394668	-0.226169	-0.70283	-0.409017	0.669143	-0.294533	0.564357	0.614983	0.447646	-0.685529	0.42871	-0.023435	-0.665065	-0.655771	-0.401408	-0.462763
GSM1524055	GSE62254	37.93	1	TMEcluster-B	-0.50801	-0.888395	-0.718649	-0.605313	-0.129839	-0.159764	-0.200695	-1.10897	-0.226169	-1.06356	6.06563	-1.22403	-0.294533	1.56779	-0.153224	-0.449756	-0.685529	0.5632	-0.885724	2.30051	0.0349196	1.6593	0.804456
GSM1524056	GSE62254	14.17	1	TMEcluster-C	-0.50801	0.832292	0.278309	1.48992	3.28411	-1.80164	-0.973072	-0.0692117	-0.226169	-0.4096	-0.409017	1.90103	-0.294533	-0.295063	0.438194	-0.643093	1.05964	-0.674015	-0.885724	0.253285	1.20274	1.23419	-1.16022
GSM1524057	GSE62254	15.93	1	TMEcluster-A	-0.50801	-1.04441	-1.88284	0.391204	-0.129839	0.722548	-0.275088	-0.486065	-0.226169	0.714039	-0.409017	0.862702	-0.294533	-1.16685	1.16866	3.14289	-0.685529	-1.09068	2.49532	-0.665065	-1.23338	-0.84069	2.27513
GSM1524058	GSE62254	85.47	0	TMEcluster-B	-0.50801	0.681895	0.283976	-0.365003	4.05914	-1.68452	-0.247069	2.13164	-0.226169	-0.200289	4.91908	-1.09038	-0.294533	0.761708	0.120071	-1.82179	-0.685529	2.5421	-0.885724	0.571004	-0.903972	0.535815	1.73193
GSM1524059	GSE62254	85.2	0	TMEcluster-B	-0.203328	0.0491562	-1.35523	-0.692945	-0.129839	0.309935	1.4677	-1.37632	-0.226169	-0.761233	0.805182	-1.22403	3.06687	-0.680085	-1.88975	-0.321952	0.177736	1.35305	-0.641575	1.19752	2.35873	1.82769	1.77147
GSM1524060	GSE62254	84.83	0	TMEcluster-B	-0.50801	-0.38852	-0.371098	-0.692945	-0.129839	-0.516517	-0.999802	1.13323	-0.226169	-1.06356	-0.409017	2.05968	-0.294533	1.40256	-0.700274	-0.302214	-0.685529	0.906833	-0.885724	1.64679	-1.01335	0.977352	-0.517118
GSM1524061	GSE62254	84.6	0	TMEcluster-C	-0.50801	1.42902	0.0403774	2.40648	-0.129839	-0.601463	0.608147	0.460854	-0.226169	-0.945656	-0.409017	0.915181	-0.294533	-1.16685	0.985331	0.992279	-0.58478	-0.401649	-0.0489346	-0.665065	-1.23338	-0.55656	-1.12899
GSM1524062	GSE62254	70.2	1	TMEcluster-A	1.36802	0.321621	-1.55112	-0.692945	-0.129839	1.90846	-0.999802	-0.812629	-0.226169	2.08708	-0.409017	-1.22403	-0.294533	-1.16685	-1.12783	1.00493	0.884261	-0.363271	0.834732	-0.665065	1.20747	-1.37578	1.82893
GSM1524068	GSE62254	92.87	0	TMEcluster-C	-0.50801	1.84915	0.195692	2.62348	-0.129839	-1.64346	-0.563387	1.51198	-0.226169	-0.293801	0.213399	1.1966	-0.294533	0.960849	0.629192	-0.601566	-0.685529	0.064332	0.448164	-0.665065	-1.23338	-1.47638	-0.595277
GSM1524069	GSE62254	85.6	1	TMEcluster-A	-0.50801	-1.04441	0.375679	0.668155	-0.129839	0.991763	0.0606529	-1.67989	1.42157	-0.24368	-0.409017	0.467254	-0.294533	0.372946	-0.27055	-0.280953	0.50428	-0.64537	1.03201	-0.665065	0.00356768	0.034555	-1.92387
GSM1524070	GSE62254	91.63	0	TMEcluster-A	-0.50801	1.05506	2.02505	0.901563	-0.129839	0.707011	-0.754696	-1.43983	-0.226169	-0.160081	-0.409017	-0.812022	0.353228	-0.0339095	-0.799854	-1.25943	2.17297	-0.527378	-0.159709	-0.235962	-0.303161	-0.354463	-0.88498
GSM1524071	GSE62254	90.77	0	TMEcluster-A	3.68305	-1.04441	2.89013	-0.692945	-0.129839	-2.1175	-0.999802	3.04463	0.903601	2.77647	-0.409017	-1.22403	1.66743	-0.645687	-1.53226	-2.01227	-0.685529	0.798069	-0.885724	2.55973	-1.04438	-1.60537	0.280917
GSM1524072	GSE62254	42.93	1	TMEcluster-A	0.87065	-0.3221	2.01031	2.32411	-0.129839	-0.502274	-0.94991	0.179291	-0.226169	-0.743258	-0.409017	-0.325167	3.66118	0.114714	-1.37089	0.297009	-0.116399	-0.0393801	-0.280452	-0.388268	-0.115906	-1.36159	0.544502
GSM2235556	GSE84437	70	1	TMEcluster-B	-0.971767	-0.454589	-0.691399	0.0194023	-0.224992	-0.644441	-0.439834	1.20162	2.35424	-0.516642	0.391775	-1.1008	-0.637976	3.19322	-1.00218	-0.140564	-0.533336	-0.704704	-0.966841	-0.153256	-0.0859676	-0.329958	-0.13536
GSM2235557	GSE84437	23	1	TMEcluster-A	-0.971767	0.427419	-0.691399	-0.612993	-0.224992	0.656292	-0.839738	0.0929524	1.39866	-0.516642	-0.517977	0.80215	1.08256	-1.02809	-1.6303	3.24578	-0.533336	2.09011	-0.262286	-0.153256	-0.0859676	-0.329958	0.941179
GSM2235558	GSE84437	24	1	TMEcluster-B	0.636763	0.854382	-0.691399	-1.07916	-0.224992	-0.170892	-0.814525	0.633507	1.065	-0.188174	1.91972	-1.10554	0.790209	1.30358	0.906456	-0.368817	-0.533336	-0.456713	-0.968533	-0.153256	-0.0859676	-0.329958	0.690605
GSM2235559	GSE84437	59	1	TMEcluster-B	0.23158	5.26528	-0.691399	0.400466	4.56738	-0.873399	-0.520064	1.439	-0.472599	-0.516642	1.78439	-1.10554	-0.637976	-0.0574383	-0.727676	-0.653049	-0.533336	-0.167978	-1.59393	-0.0446367	-0.0859676	-0.329958	0.300717
GSM2235560	GSE84437	12	1	TMEcluster-A	-0.971767	0.168751	-0.691399	0.186025	-0.224992	2.06063	-0.687142	-1.06814	-0.558429	-0.516642	1.89299	-1.10554	-0.571389	-1.02809	0.237158	2.64718	-0.533336	-0.465184	-0.823891	-0.153256	-0.0859676	-0.329958	1.25088
GSM2235561	GSE84437	85	0	TMEcluster-A	1.34313	1.22547	-0.691399	-0.730202	6.36685	0.0848087	-0.368244	-0.878003	-0.558429	-0.516642	-0.517977	0.0939223	-0.272629	-0.226667	-1.07126	1.47355	-0.533336	0.379495	-0.5426	-0.153256	-0.0859676	-0.329958	1.36679
GSM2235562	GSE84437	18	1	TMEcluster-B	-0.1414	-0.454589	0.916494	-0.902882	0.477496	0.509428	-0.0145001	-1.06814	-0.558429	-0.516642	-0.517977	0.219754	-0.637976	1.5587	-1.06149	0.346598	-0.533336	0.208769	-0.460382	-0.153256	-0.0859676	-0.329958	-0.0828795
GSM2235563	GSE84437	14	1	TMEcluster-B	-0.404773	-0.454589	-0.691399	1.18049	-0.224992	-1.54407	0.133448	0.745613	1.34957	-0.516642	2.14138	-1.02752	-0.637976	2.35067	-0.499504	-0.643265	-0.533336	-0.704704	-0.521818	-0.153256	-0.0859676	-0.329958	0.184485
GSM2235564	GSE84437	84	0	TMEcluster-B	0.741527	-0.454589	-0.691399	-0.261228	-0.224992	0.146254	0.267516	0.280649	-0.210039	-0.516642	5.38795	-1.10554	0.982154	0.842069	-0.523853	-1.78792	-0.533336	0.0359889	-1.63924	11.652	-0.0859676	-0.329958	-1.65182
GSM2235565	GSE84437	65	1	TMEcluster-A	0.22288	-0.454589	-0.691399	-0.926635	-0.224992	0.836362	-0.839738	-0.257342	3.80558	1.1226	-0.517977	1.64726	-0.336919	-0.613719	0.435423	-0.195756	-0.506593	-0.704704	0.17494	-0.153256	-0.0859676	-0.329958	0.933465
GSM2235566	GSE84437	11	1	TMEcluster-C	-0.971767	2.11388	-0.691399	1.24049	-0.224992	-1.25357	-0.413304	1.99208	0.613237	-0.516642	-0.517977	-0.79649	-0.637976	-0.182225	0.428122	0.761459	0.938494	-0.704704	-0.0208804	-0.153256	-0.0859676	-0.329958	0.449121
GSM2235567	GSE84437	43	1	TMEcluster-C	-0.81047	0.382149	0.831318	1.58405	-0.224992	-0.531706	-0.165948	2.06059	2.1158	-0.516642	0.21523	-1.10554	-0.637976	-0.870119	-0.772651	1.8033	-0.390008	-0.682882	-0.842917	-0.153256	-0.0859676	-0.329958	0.992051
GSM2235568	GSE84437	82	0	TMEcluster-B	0.210104	-0.454589	1.81097	-1.22841	-0.224992	-0.530866	-0.542656	-0.580346	2.69981	-0.516642	-0.517977	0.98569	-0.637976	-0.289689	-1.52983	-0.32757	-0.533336	6.61337	-0.576274	-0.153256	-0.0859676	2.09898	-0.483331
GSM2235569	GSE84437	82	0	TMEcluster-B	-0.885515	-0.454589	-0.691399	-0.235908	-0.224992	0.326278	-0.837184	-0.0791166	3.14219	-0.516642	-0.517977	0.0500264	-0.637976	1.30621	-1.05885	0.147178	-0.533336	2.38795	-0.749112	-0.153256	-0.0859676	-0.00554345	-0.144833
GSM2235570	GSE84437	81	0	TMEcluster-B	-0.321735	-0.454589	-0.688387	-1.22841	6.50961	-1.54407	-0.839738	0.321594	-0.317029	0.467956	-0.517977	0.616996	1.05291	3.92948	-1.13024	-0.597506	0.128901	-0.704704	-0.744753	-0.153256	-0.0859676	-0.329958	1.21804
GSM2235571	GSE84437	80	0	TMEcluster-B	-0.717105	-0.454589	-0.691399	-1.2231	-0.224992	0.43615	0.728067	-0.339108	0.718793	-0.516642	0.321178	-0.488583	-0.524999	2.6286	-1.10277	0.308142	-0.533336	-0.704704	-1.63924	6.41161	-0.0859676	-0.329958	0.417228
GSM2235572	GSE84437	86	0	TMEcluster-C	-0.353499	-0.454589	-0.691399	2.24314	-0.224992	-1.21175	0.487793	0.837502	0.203446	-0.516642	0.144784	-0.434102	0.0722311	0.0552571	1.61625	-0.473587	-0.305858	-0.704704	-0.380409	-0.153256	-0.0859676	-0.329958	0.642282
GSM2235573	GSE84437	82	0	TMEcluster-B	-0.971767	0.522022	0.770315	-0.737932	-0.224992	0.501601	0.952847	0.136105	-0.558429	-0.516642	2.91893	-1.03101	-0.0858335	0.0508523	0.268048	-0.238995	-0.533336	0.623897	-1.17534	-0.153256	-0.0859676	-0.329958	0.765999
GSM2235574	GSE84437	11	1	TMEcluster-B	-0.00159402	-0.454589	-0.691399	-1.10385	-0.224992	1.91936	-0.839738	-1.06814	0.505965	-0.516642	3.63073	-1.10554	2.99398	0.724507	0.0704509	-1.78792	-0.533336	1.1616	-1.11805	1.07412	-0.0859676	-0.329958	1.43943
GSM2235575	GSE84437	86	0	TMEcluster-B	1.02599	-0.454589	-0.547975	-0.0809655	-0.224992	-0.0516509	-0.277565	-0.160751	0.415953	-0.516642	1.67565	-1.10554	-0.637976	2.41412	-1.23544	-1.12589	-0.533336	1.2087	-1.22976	-0.153256	-0.0859676	0.0542974	-1.84631
GSM2235576	GSE84437	4	1	TMEcluster-C	-0.971767	-0.27995	-0.206869	-0.104303	-0.224992	-0.725627	1.51376	-0.426553	-0.558429	-0.516642	1.8539	0.149791	-0.171445	-0.433586	0.228921	0.784069	-0.533336	-0.0563837	0.820268	-0.153256	-0.0859676	-0.329958	-1.10791
GSM2235577	GSE84437	19	1	TMEcluster-B	-0.971767	0.468855	-0.611924	-0.144227	-0.224992	1.3859	-0.540463	-1.06814	-0.258104	-0.516642	4.4641	-1.10554	1.23316	0.190487	-0.0624881	-0.563195	0.920435	-0.178747	-0.82737	-0.153256	-0.0859676	-0.329958	1.52133
GSM2235578	GSE84437	21	1	TMEcluster-B	-0.577683	-0.454589	-0.691399	-0.485709	-0.224992	-0.165972	2.29796	-1.06814	-0.558429	-0.516642	2.3743	-0.293965	-0.637976	1.44372	-0.00914809	-0.4207	-0.533336	-0.335687	-1.05707	-0.153256	-0.0859676	-0.0137062	-0.6253
GSM2235579	GSE84437	17	1	TMEcluster-C	-0.971767	-0.390044	-0.691399	0.633486	-0.224992	-0.524178	0.86516	-1.06814	-0.213465	-0.516642	1.44777	0.894963	-0.637976	-0.270245	2.46846	1.22977	0.125491	-0.23833	-1.19352	-0.153256	-0.0859676	-0.329958	1.69431
GSM2235580	GSE84437	25	1	TMEcluster-B	-0.920323	1.72697	2.56914	0.563473	1.49851	-0.170227	0.0534457	-1.06814	-0.517162	-0.516642	1.40251	-1.01099	0.522728	-0.59215	-0.836131	-0.233044	-0.231969	0.521915	-0.532425	-0.153256	-0.0859676	0.0431974	0.776956
GSM2235582	GSE84437	13	1	TMEcluster-B	-0.971767	0.065798	2.11398	1.38913	-0.224992	0.218095	-0.431303	-1.06814	-0.558429	-0.516642	1.38035	-1.10554	0.707924	0.521001	-1.05991	0.0365842	-0.533336	-0.429715	-0.71921	-0.153256	-0.0859676	-0.329958	-0.0297279
GSM2235584	GSE84437	57	1	TMEcluster-A	0.11511	-0.454589	1.18349	-0.875865	-0.224992	1.31509	-0.839738	-1.06814	-0.558429	-0.516642	-0.517977	2.02389	0.888945	-0.270615	-1.09136	-0.0268981	-0.533336	0.0614616	0.301565	-0.153256	-0.0859676	0.295784	-0.257614
GSM2235585	GSE84437	23	1	TMEcluster-B	-0.669029	-0.454589	-0.691399	-0.39408	-0.224992	0.99002	0.698302	-0.776079	-0.558429	-0.516642	0.721572	-0.94308	-0.157689	0.342438	1.53498	0.0131663	0.977076	-0.704704	-0.694452	-0.153256	-0.0859676	-0.329958	-0.462368
GSM2235586	GSE84437	77	0	TMEcluster-C	-0.471651	-0.0530105	0.0237493	1.94065	-0.224992	-0.151857	0.730528	-1.06814	-0.558429	0.0589261	-0.37077	-1.10554	0.664118	-0.154096	0.427531	-0.23419	1.17348	-0.704704	-0.539581	-0.153256	-0.0859676	-0.329958	0.0763881
GSM2235587	GSE84437	64	1	TMEcluster-A	0.2762	-0.454589	-0.252428	1.10863	1.09645	-0.509191	-0.535715	-0.876166	-0.558429	-0.516642	1.13846	-0.737495	0.446067	0.48232	0.598623	-0.433314	-0.484474	-0.258578	0.468064	-0.153256	-0.0859676	-0.329958	0.262286
GSM2235588	GSE84437	51	1	TMEcluster-A	0.185467	-0.454589	-0.691399	-0.12282	-0.224992	1.11578	-0.839738	-1.06814	-0.558429	-0.516642	-0.517977	0.125764	0.910781	-1.02809	-0.821733	3.08883	-0.533336	-0.66074	0.857144	-0.153256	-0.0859676	-0.329958	1.01541
GSM2235589	GSE84437	77	0	TMEcluster-B	-0.584723	-0.454589	-0.691399	-0.174421	-0.224992	0.981707	0.576693	-1.06814	-0.558429	-0.516642	2.14887	-1.10554	3.69457	0.711511	0.0933319	-1.19176	-0.533336	-0.0728829	-0.754566	-0.153256	-0.0859676	-0.329958	0.607908
GSM2235593	GSE84437	77	0	TMEcluster-B	-0.449087	-0.454589	-0.691399	-0.0586254	-0.224992	0.356971	1.15398	-0.888632	-0.558429	-0.516642	1.62155	-0.885517	-0.637976	0.00924667	1.22184	0.550768	0.387826	-0.287957	-0.815092	-0.153256	-0.0859676	0.649138	-0.179443
GSM2235595	GSE84437	15	1	TMEcluster-A	0.564158	1.98355	-0.691399	0.298362	-0.164557	0.774279	-0.839738	-0.101137	-0.198838	-0.516642	-0.517977	-0.255648	-0.637976	-0.204745	-0.857583	0.466788	-0.533336	0.636334	-0.584349	-0.153256	-0.0859676	-0.329958	0.722994
GSM2235596	GSE84437	75	0	TMEcluster-A	0.0193555	-0.454589	1.30489	1.26747	-0.224992	1.07583	-0.481596	0.175103	-0.558429	-0.516642	1.29929	-1.10554	0.137523	-0.675153	0.0300307	-0.452537	0.633293	-0.395218	-1.00997	-0.153256	-0.0859676	-0.310044	-0.110105
GSM2235597	GSE84437	84	0	TMEcluster-C	-0.843343	-0.0088616	2.21298	1.30868	-0.224992	-0.731236	0.0292915	1.06853	-0.558429	-0.516642	-0.517977	-0.0843281	-0.637976	-0.790732	0.962382	-0.4635	-0.533336	-0.704704	-0.401295	-0.153256	-0.0859676	3.38709	-1.32374
GSM2235598	GSE84437	21	1	TMEcluster-A	-0.209619	6.6649	-0.362866	0.796639	0.913499	-0.813397	-0.475097	1.12411	-0.558429	-0.516642	0.20699	-1.10554	-0.637621	-0.275497	-0.798862	-0.393421	-0.533336	-0.0801279	-1.37752	-0.153256	-0.0859676	-0.329958	0.834577
GSM2235599	GSE84437	80	0	TMEcluster-C	-0.339836	-0.454589	1.80982	2.11216	-0.224992	-0.591803	-0.112934	-0.305527	-0.558429	-0.516642	-0.0535192	0.355514	0.0180885	0.185723	-0.19414	-0.48986	0.894204	-0.480271	-0.878637	-0.153256	-0.0859676	-0.329958	0.100448
GSM2235600	GSE84437	74	0	TMEcluster-B	-0.971767	-0.182765	0.486288	0.0967178	-0.224992	-0.323344	-0.73273	-1.06814	-0.0702164	-0.516642	-0.517977	0.900524	0.56597	2.0396	-1.12576	-0.128727	-0.533336	1.09903	-0.376097	-0.153256	-0.0859676	-0.329958	1.15359
GSM2235601	GSE84437	74	0	TMEcluster-A	-0.327646	0.196754	1.25632	-0.129024	-0.224992	0.230997	-0.47588	-0.764799	-0.336962	-0.516642	-0.517977	-0.729598	1.87373	-0.739523	-0.213392	-0.262083	1.00692	-0.219606	1.61713	-0.153256	-0.0859676	-0.329958	0.993092
GSM2235602	GSE84437	82	0	TMEcluster-B	0.05676	3.4498	0.367742	1.28302	1.75968	-1.25371	-0.330799	1.01081	-0.558429	-0.516642	2.71151	-1.10554	-0.601526	-0.324047	0.336001	-1.05062	-0.533336	0.398645	-1.21093	-0.153256	-0.0859676	-0.329958	1.194
GSM2235603	GSE84437	80	0	TMEcluster-C	-0.541076	-0.454589	0.0799615	1.08867	-0.224992	-1.12925	-0.197929	0.927601	1.58699	-0.516642	-0.475411	0.728629	-0.637976	0.418215	0.397177	0.389267	-0.283846	-0.460131	-0.198529	-0.153256	-0.0859676	-0.329958	0.375284
GSM2235604	GSE84437	74	0	TMEcluster-C	-0.823109	-0.247692	-0.691399	0.841316	-0.224992	-1.54407	2.88878	-0.000118433	-0.558429	-0.516642	1.36685	-0.894723	1.17508	-0.575543	0.563497	0.253643	-0.180029	-0.0687712	0.394214	-0.153256	-0.0859676	-0.329958	-0.0411801
GSM2235605	GSE84437	67	1	TMEcluster-A	-0.794519	0.484887	-0.51847	1.18917	-0.224992	0.0747523	-0.839738	-0.524478	-0.558429	-0.516642	-0.517977	-0.110098	0.1284	-1.02809	-0.75502	0.916515	0.426108	-0.122429	2.07844	-0.153256	-0.0859676	-0.329958	0.536204
GSM2235606	GSE84437	73	0	TMEcluster-A	-0.758725	1.32785	0.459434	0.693508	4.31029	-0.687289	-0.687681	0.167588	-0.401049	-0.516642	-0.0778621	-0.885222	-0.017511	-0.182249	-0.917151	0.446618	-0.533336	0.502092	0.576293	-0.153256	-0.0859676	-0.329958	1.46463
GSM2235607	GSE84437	6	1	TMEcluster-B	-0.971767	-0.454589	-0.644539	-0.194382	-0.224992	-0.524861	0.151767	-1.06814	-0.558429	-0.516642	-0.517977	-0.225031	3.17897	2.33293	-0.349824	0.423928	-0.533336	-0.704704	-0.738542	-0.153256	-0.0859676	1.55308	1.26731
GSM2235608	GSE84437	80	0	TMEcluster-B	0.668218	-0.454589	-0.513274	-1.22841	-0.224992	2.76715	0.82531	-0.847161	-0.558429	-0.516642	1.19248	-1.10554	-0.637976	0.00369107	-1.00235	-0.974003	-0.533336	2.02381	-1.41816	-0.153256	-0.0859676	-0.125825	-1.82589
GSM2235609	GSE84437	8	1	TMEcluster-C	-0.684342	-0.218771	0.75393	1.57186	-0.224992	-1.10948	0.20347	0.240553	-0.469838	1.53917	-0.517977	0.397156	-0.637976	-0.030022	-0.0937954	-1.06549	0.00485195	-0.575495	0.744234	-0.153256	-0.0859676	-0.329958	1.00209
GSM2235610	GSE84437	23	1	TMEcluster-A	-0.607249	0.69213	-0.691399	0.488787	-0.224992	0.0389229	-0.289506	-1.06814	-0.558429	-0.516642	-0.517977	-0.0916352	0.57185	-0.502511	-0.163229	1.37104	0.942142	-0.0533545	0.78537	-0.153256	-0.0859676	-0.329958	1.2545
GSM2235611	GSE84437	8	1	TMEcluster-A	-0.428925	-0.454589	1.76738	-0.401461	-0.224992	1.83647	-0.601673	-1.06814	-0.450198	-0.516642	-0.0683048	-0.844737	0.01125	-0.619164	-0.881615	-0.10574	0.314481	0.0373253	0.699376	-0.153256	-0.0859676	-0.329958	-0.627228
GSM2235612	GSE84437	29	1	TMEcluster-A	-0.971767	1.72271	-0.322773	1.09272	-0.224992	0.717362	-0.839738	-0.624227	-0.19545	-0.516642	-0.517977	0.29009	0.325059	-0.675378	-0.20853	-0.0419692	-0.533336	-0.65507	0.470469	-0.153256	-0.0859676	-0.329958	1.11727
GSM2235613	GSE84437	83	0	TMEcluster-B	-0.971767	-0.454589	-0.282861	-0.438964	-0.224992	2.09388	-0.137546	-1.06814	-0.558429	-0.516642	-0.517977	0.467242	-0.600466	0.418211	-1.42181	0.251709	-0.533336	0.439684	-0.267292	-0.153256	-0.0859676	0.272549	-1.31465
GSM2235614	GSE84437	77	0	TMEcluster-C	-0.66626	-0.454589	-0.691399	0.0590065	-0.224992	0.168151	1.77032	0.593608	-0.558429	-0.516642	1.02126	-0.873778	0.244238	-0.59345	0.695759	-0.361121	0.115176	-0.320617	0.233394	-0.153256	-0.0859676	-0.329958	-0.427471
GSM2235615	GSE84437	77	0	TMEcluster-B	0.593348	-0.454589	-0.667851	-0.678701	0.363867	0.719386	-0.384539	-1.06814	-0.51699	-0.516642	1.79003	-0.611329	-0.637976	0.915829	-1.21048	-0.351407	-0.533336	2.4556	0.00516143	-0.153256	-0.0859676	-0.329958	1.54614
GSM2235616	GSE84437	1	1	TMEcluster-A	-0.517763	0.224495	-0.691399	-0.0638159	-0.224992	-0.178801	0.341078	-1.06814	-0.188442	-0.516642	-0.517977	1.36366	-0.637976	-0.42622	0.777433	0.158627	-0.533336	-0.289377	1.03785	-0.153256	-0.0859676	1.1538	-0.0343886
GSM2235617	GSE84437	71	0	TMEcluster-A	-0.667651	-0.454589	-0.691399	-0.483853	-0.224992	1.95295	-0.839738	-0.406469	-0.558429	-0.208571	-0.517977	0.0187118	1.38198	-0.726311	1.23982	0.458692	-0.440829	-0.047079	-0.141591	-0.153256	-0.0859676	-0.329958	-0.85826
GSM2235618	GSE84437	71	0	TMEcluster-B	-0.911519	-0.454589	0.260967	-1.22841	-0.224992	1.45306	1.06405	0.0450925	-0.558429	-0.516642	1.97299	-0.518823	1.54422	-0.21582	0.0875818	-1.62641	-0.533336	-0.704704	0.442841	-0.153256	-0.0859676	-0.329958	-0.897155
GSM2235619	GSE84437	70	0	TMEcluster-A	-0.971767	1.41086	0.108459	-0.0504346	-0.224992	0.36934	-0.839738	0.798353	0.536919	-0.516642	-0.517977	0.350497	-0.326238	-0.900311	-0.428907	1.13897	-0.533336	0.343676	0.366451	-0.153256	-0.0859676	-0.329958	-0.0573356
GSM2235620	GSE84437	71	0	TMEcluster-C	-0.142338	-0.454589	1.13022	-0.0602035	-0.224992	0.567611	0.33591	-0.323132	0.88456	-0.516642	-0.517977	0.843434	-0.637976	0.502547	0.142713	-1.11034	-0.533336	-0.429131	-0.800858	-0.153256	-0.0859676	-0.329958	-0.392881
GSM2235621	GSE84437	33	1	TMEcluster-B	-0.649647	-0.124685	-0.691399	-0.369892	0.169192	-0.122029	-0.839738	-0.205969	2.34506	-0.516642	4.0944	-1.10554	1.87285	-1.02809	-1.05294	3.02098	-0.533336	0.63569	-0.0155783	2.39011	-0.0859676	-0.329958	-0.535696
GSM2235622	GSE84437	23	1	TMEcluster-A	1.44731	1.54806	-0.691399	0.286119	-0.224992	1.11209	-0.568602	1.05182	-0.558429	-0.516642	-0.517977	-1.07842	-0.637976	-0.603021	-0.490596	-0.476235	-0.533336	0.512665	-0.560304	-0.153256	-0.0859676	-0.329958	0.954216
GSM2235623	GSE84437	21	1	TMEcluster-B	-0.808731	-0.308465	0.219625	-1.22841	-0.224992	1.39509	0.337671	0.259374	-0.558429	-0.516642	-0.0801588	1.07906	-0.637976	-0.436355	1.06614	-0.782481	-0.516723	-0.656363	-0.112068	-0.153256	-0.0859676	1.77181	-1.61145
GSM2235624	GSE84437	77	0	TMEcluster-A	0.758293	-0.454589	-0.377223	-0.150402	-0.224992	0.912037	0.287746	0.375171	-0.558429	0.138581	-0.517977	-0.431224	0.0225999	-0.519983	-0.309754	-0.163984	0.921483	-0.704704	-0.149706	-0.153256	-0.0859676	1.23364	-0.432483
GSM2235625	GSE84437	70	0	TMEcluster-A	-0.971767	-0.213214	2.0575	0.429068	-0.224992	-0.308785	-0.839738	-0.929086	-0.558429	0.283816	-0.517977	1.58476	-0.0661937	-1.02809	-0.536953	-0.324413	2.15753	-0.704704	2.15607	-0.153256	-0.0859676	-0.268759	0.167853
GSM2235626	GSE84437	77	0	TMEcluster-A	0.274365	-0.454589	0.0564612	-0.984227	-0.224992	0.124067	-0.161061	-1.06814	-0.253324	-0.516642	-0.221331	-0.942146	-0.380883	-0.00814519	-1.36168	1.08161	3.22674	0.148403	2.00051	-0.153256	-0.0859676	-0.329958	1.10906
GSM2235627	GSE84437	70	0	TMEcluster-A	0.951905	-0.454589	-0.636764	-0.552411	-0.224992	0.339653	-0.696969	-0.617744	-0.558429	-0.516642	-0.517977	1.14286	-0.0167319	0.2276	0.666794	0.361804	1.00533	-0.704704	0.161501	-0.153256	-0.0859676	0.36972	-0.393093
GSM2235628	GSE84437	74	0	TMEcluster-A	-0.400097	-0.454589	0.885769	-0.669652	-0.224992	1.24017	-0.247237	-1.06814	-0.558429	-0.516642	-0.517977	-0.832762	0.153921	-0.289783	-1.49819	1.43966	1.1378	-0.238113	0.846597	-0.153256	-0.0859676	-0.090267	1.31602
GSM2235629	GSE84437	36	1	TMEcluster-A	-0.321818	-0.454589	2.3913	-0.26952	-0.224992	0.0838369	-0.0572807	-0.696237	-0.558429	-0.516642	-0.517977	0.353627	1.92175	-0.237246	-0.541709	-0.595214	0.0278506	-0.074799	0.587791	-0.153256	-0.0859676	0.399008	0.662133
GSM2235630	GSE84437	70	0	TMEcluster-A	-0.248224	3.81565	-0.378526	1.13826	-0.224992	-0.67483	-0.760977	-0.583537	-0.558429	-0.148446	-0.517977	-0.735303	0.847392	-1.02809	-1.28614	0.807178	-0.137869	0.352855	0.93001	-0.153256	-0.0859676	-0.329958	0.794759
GSM2235631	GSE84437	69	0	TMEcluster-A	-0.813184	0.597361	0.74859	0.218626	-0.224992	1.97707	-0.381248	-1.06814	-0.558429	-0.516642	-0.517977	-0.434165	-0.532217	-1.02809	-0.641623	-0.648468	1.64132	-0.704704	0.821721	-0.153256	-0.0859676	-0.329958	0.619596
GSM2235632	GSE84437	76	0	TMEcluster-A	-0.971767	1.03812	0.563055	-0.203262	-0.224992	0.901505	-0.337852	-0.815744	-0.558429	-0.516642	-0.517977	0.263473	0.354253	-0.0401521	0.134424	-0.648769	0.151096	-0.581218	0.354932	-0.153256	-0.0859676	-0.325434	-0.308855
GSM2235633	GSE84437	17	1	TMEcluster-A	0.0320625	-0.454589	-0.691399	0.810968	-0.224992	1.37616	-0.609349	-1.06814	-0.558429	0.0995939	-0.517977	-0.343404	0.300688	-0.955174	0.798768	0.25097	1.38584	-0.704704	-0.084033	-0.153256	-0.0859676	0.564742	0.992465
GSM2235634	GSE84437	74	0	TMEcluster-A	-0.848345	-0.0854457	-0.691399	-0.665038	-0.224992	0.0727453	-0.689913	-1.06814	-0.556369	-0.516642	-0.39158	-0.577125	1.17333	-0.510379	-0.0189336	-0.904713	0.368436	0.198579	4.4254	-0.153256	-0.0859676	-0.329958	0.518704
GSM2235635	GSE84437	72	0	TMEcluster-C	-0.712564	-0.454589	-0.487327	-0.50803	-0.224992	-0.64003	1.65652	-0.743465	-0.558429	-0.516642	0.407397	0.468644	0.0759076	1.27267	-0.157809	-1.23087	0.210794	0.0280269	0.709503	-0.153256	-0.0859676	-0.329958	-0.873644
GSM2235636	GSE84437	69	0	TMEcluster-A	-0.816229	-0.454589	-0.220711	-1.01966	-0.224992	2.15024	-0.839738	-1.06814	-0.558429	1.62455	-0.517977	-0.715908	-0.321893	-0.993627	-0.890843	0.737682	1.15042	0.362034	1.31068	-0.153256	-0.0859676	-0.329958	0.644587
GSM2235637	GSE84437	68	0	TMEcluster-C	-0.971767	1.63413	0.0046721	0.218087	-0.224992	-0.55388	1.0365	1.19801	-0.558429	-0.418414	0.792417	-1.10554	-0.637976	-0.123232	-0.466025	0.639354	-0.533336	0.339936	-0.483851	-0.153256	-0.0859676	-0.329958	-1.62873
GSM2235695	GSE84437	121	0	TMEcluster-C	-0.971767	1.65571	-0.691399	-0.496999	-0.153547	-1.54407	1.10707	-0.681433	-0.558429	1.58971	-0.517977	1.63108	-0.637976	-0.702303	0.521364	1.94142	1.41334	-0.704704	0.350387	-0.153256	0.377182	-0.329958	-2.94666
GSM2235696	GSE84437	108	0	TMEcluster-C	-0.197765	-0.454589	-0.691399	-0.628443	-0.224992	-1.14009	1.30733	0.365863	-0.326966	3.84313	-0.517977	0.27129	-0.637976	-0.0593839	0.577086	0.341574	1.0929	-0.704704	0.0508725	-0.153256	-0.0859676	-0.329958	-0.952961
GSM2235697	GSE84437	39	1	TMEcluster-B	1.34485	-0.454589	0.40898	-1.13648	-0.224992	-0.347542	-0.71102	1.69986	0.96776	1.06022	-0.517977	-0.79987	-0.637976	1.45439	-1.6303	-0.316733	-0.533336	3.49954	-1.63924	-0.0646602	-0.0859676	0.753629	-1.57859
GSM2235698	GSE84437	23	1	TMEcluster-C	-0.960729	-0.405219	-0.691399	2.01433	-0.224992	-0.633053	-0.427588	-1.06814	-0.275972	0.986495	-0.517977	-0.358468	3.61171	-0.191567	0.873267	-0.652156	0.958995	-0.47331	0.407876	-0.153256	-0.0859676	-0.329958	-1.22733
GSM2235699	GSE84437	23	1	TMEcluster-B	-0.709472	-0.454589	-0.691399	-0.246984	-0.224992	1.26674	0.0230877	-1.06814	-0.558429	-0.516642	0.530031	-0.949025	-0.142884	1.14348	-0.484877	0.257575	-0.533336	-0.704704	-0.0415967	-0.153256	-0.0859676	-0.329958	0.745322
GSM2235700	GSE84437	117	0	TMEcluster-C	-0.0228279	-0.454589	-0.0789981	0.645337	-0.224992	0.294987	-0.470304	0.197224	-0.558429	1.30163	-0.517977	-0.667332	-0.637976	-0.61718	1.44541	0.109171	-0.533336	-0.704704	0.0194149	-0.153256	-0.0859676	0.644528	0.0682683
GSM2235701	GSE84437	108	0	TMEcluster-B	-0.0277731	-0.454589	0.419898	-1.22841	0.128961	0.349297	4.26029	-1.06814	-0.558429	-0.516642	1.55088	-1.10554	1.2265	0.0763817	-1.06838	-1.78792	-0.533336	-0.418258	-0.0945319	-0.153256	2.0135	-0.329958	-2.44209
GSM2235702	GSE84437	18	1	TMEcluster-B	-0.445384	-0.454589	-0.296414	-1.22841	-0.224992	0.431552	-0.839738	0.405336	2.34418	-0.516642	-0.517977	0.95355	-0.637976	1.29045	-1.53768	-1.02052	0.180694	2.88204	0.0397163	-0.153256	-0.0859676	-0.325688	0.583685
GSM2235703	GSE84437	43	1	TMEcluster-A	1.83755	-0.454589	0.396556	-0.056161	-0.224992	0.172655	-0.81112	0.391696	-0.558429	1.43884	-0.517977	-0.00368517	-0.637976	-0.289968	-0.267147	0.331962	-0.533336	-0.525404	0.00441009	-0.153256	-0.0859676	-0.329958	0.0594645
GSM2235704	GSE84437	109	0	TMEcluster-A	1.07555	-0.454589	-0.283209	0.101981	-0.224992	-0.79426	-0.756949	0.326766	-0.558429	0.711976	-0.517977	-0.910586	-0.637976	2.06571	-0.911214	0.0458947	-0.533336	-0.704704	0.334084	-0.153256	-0.0859676	-0.329958	-0.0487619
GSM2235705	GSE84437	114	0	TMEcluster-B	0.39018	-0.132837	-0.691399	-0.398026	-0.224992	-0.769801	-0.839738	-0.144091	1.11714	-0.516642	-0.517977	-0.7372	-0.637976	2.32687	-1.19913	0.499101	-0.533336	-0.704704	0.955205	-0.153256	-0.0859676	-0.329958	-0.467982
GSM2235706	GSE84437	2	1	TMEcluster-B	-0.0660771	-0.454589	-0.613239	-1.02956	-0.224992	1.00627	-0.395629	-1.06814	-0.558429	-0.516642	-0.517977	-0.136334	-0.637976	1.40269	0.815216	0.357697	-0.533336	-0.658015	-0.186628	-0.153256	-0.0859676	-0.329958	-0.0766017
GSM2235707	GSE84437	116	0	TMEcluster-A	-0.971767	-0.0826987	1.08138	-0.685158	-0.224992	1.02139	-0.0240061	-0.803114	-0.558429	-0.516642	-0.517977	0.941393	-0.342444	-0.932626	1.53831	1.11456	-0.533336	-0.704704	-0.830309	-0.153256	-0.0859676	2.41977	-0.852134
GSM2235708	GSE84437	109	0	TMEcluster-C	-0.790519	-0.240121	0.68581	-0.729016	-0.224992	0.803983	0.434934	1.56349	-0.509779	0.743359	-0.517977	-0.79288	-0.637976	0.172249	1.00505	-1.29878	-0.152118	-0.704178	-0.283226	-0.153256	-0.0859676	-0.329958	-1.01091
GSM2235709	GSE84437	108	0	TMEcluster-C	-0.466951	-0.454589	0.0275618	0.813875	-0.224992	-1.54407	1.80137	0.234683	-0.113058	1.33447	-0.517977	2.72841	-0.447275	0.0959043	-0.086096	-1.49782	-0.141908	-0.409335	0.0460889	-0.153256	-0.0859676	-0.329958	-1.82608
GSM2235710	GSE84437	13	1	TMEcluster-A	0.0350781	-0.454589	-0.691399	-1.22841	-0.224992	1.51703	-0.648393	-0.239384	-0.558429	-0.431218	0.722174	-0.696465	-0.637976	-0.44352	1.54177	0.698064	5.99778	-0.704704	-0.70157	-0.153256	-0.0859676	-0.0638898	-0.183094
GSM2235711	GSE84437	19	1	TMEcluster-C	0.109836	-0.454589	-0.691399	1.03909	-0.224992	-0.257836	0.764131	0.630225	-0.558429	1.25737	-0.517977	1.13797	-0.637976	-1.02809	0.101456	0.156321	1.44722	-0.161649	-0.4633	-0.153256	-0.0859676	-0.329958	-1.14271
GSM2235712	GSE84437	108	0	TMEcluster-B	1.26138	-0.454589	-0.691399	-1.22841	10.0227	-0.575817	-0.839738	-0.168233	0.576055	-0.516642	0.978028	-0.265233	-0.637976	2.22694	-0.109656	-1.78792	-0.533336	-0.704704	-0.945993	-0.153256	-0.0859676	2.18315	-2.68818
GSM2235713	GSE84437	116	1	TMEcluster-A	2.11841	-0.454589	-0.691399	-1.21834	3.23629	-0.638099	-0.839738	0.776472	-0.558429	3.47996	-0.517977	-0.457445	-0.637976	0.748016	-0.658777	0.624639	-0.533336	-0.704704	-0.0533548	-0.153256	-0.0859676	-0.329958	-0.119556
GSM2235714	GSE84437	46	1	TMEcluster-B	-0.533055	-0.454589	0.582836	-1.22841	-0.224992	2.1638	-0.839738	0.482047	-0.520153	1.79572	-0.517977	-0.543162	-0.637976	0.129816	-0.389779	0.259627	-0.533336	-0.704704	-1.22295	-0.153256	-0.0859676	1.92947	-2.41949
GSM2235715	GSE84437	118	0	TMEcluster-C	-0.665236	-0.454589	-0.691399	0.898188	-0.224992	-1.54407	2.88734	1.20757	-0.558429	1.91451	-0.517977	-0.566635	-0.637976	-0.632835	0.884372	-0.0598754	0.00195312	-0.704704	-0.0127054	-0.153256	-0.0859676	-0.329958	-0.871557
GSM2235716	GSE84437	104	1	TMEcluster-B	1.17008	-0.454589	-0.477527	-0.895428	-0.224992	1.36707	-0.295603	-0.318988	-0.272867	-0.442969	-0.517977	-0.494836	-0.637976	1.49097	-0.433894	-1.40315	-0.533336	-0.501764	-0.336003	-0.153256	10.7956	-0.329958	-0.557942
GSM2235717	GSE84437	3	1	TMEcluster-A	-0.734666	-0.454589	-0.691399	-0.330187	-0.224992	0.427757	-0.839738	-1.01876	0.881308	-0.516642	-0.517977	1.19894	1.19597	-0.782679	0.173855	0.349955	-0.0328456	-0.704704	2.42238	-0.153256	-0.0859676	-0.329958	1.19704
GSM2235718	GSE84437	119	0	TMEcluster-A	0.0062458	-0.454589	1.17107	-0.656075	-0.224992	1.13778	-0.839738	-0.0514419	0.896628	-0.516642	-0.517977	0.302622	0.319466	-0.368525	-0.972827	-0.928393	0.461796	0.687504	0.804295	-0.153256	-0.0859676	-0.329958	-0.0740454
GSM2235719	GSE84437	1	1	TMEcluster-A	0.357826	-0.454589	-0.551163	0.178475	-0.224992	-0.563269	-0.839738	-0.350356	-0.023382	-0.516642	-0.517977	2.12561	-0.637976	0.700929	0.258863	1.42818	-0.533336	-0.0644281	-0.651217	-0.153256	-0.0859676	0.735425	0.586344
GSM2235720	GSE84437	119	0	TMEcluster-C	0.353322	-0.454589	0.0287363	1.29047	-0.224992	-0.341633	0.0508538	0.43897	-0.558429	-0.516642	0.144135	-0.359892	-0.630329	0.0501781	0.482638	-0.327087	1.95203	-0.511174	-0.580073	-0.153256	-0.0859676	0.196119	0.70407
GSM2235721	GSE84437	119	0	TMEcluster-C	0.318143	-0.454589	-0.597594	0.269308	-0.224992	-0.603186	1.10723	1.64141	-0.0511877	0.469492	0.430645	-0.247496	-0.637976	-0.443086	-0.97404	0.722515	0.818403	0.747571	-0.622601	-0.153256	-0.0859676	0.434446	0.620112
GSM2235722	GSE84437	36	1	TMEcluster-A	-0.813704	-0.232788	-0.691399	-0.48519	-0.224992	1.03777	-0.207741	-0.713042	0.279611	-0.330562	-0.517977	-0.635155	1.25317	-0.921975	1.24951	-0.404748	-0.533336	3.14811	0.332191	-0.153256	-0.0859676	-0.329958	0.40954
GSM2235723	GSE84437	118	0	TMEcluster-A	-0.798178	-0.454589	-0.110717	1.38833	-0.224992	0.0619869	-0.631476	0.514969	-0.558429	-0.516642	0.0713899	-1.10554	2.05926	-0.0995186	-0.595865	-1.26027	3.78844	2.32588	-0.202735	-0.153256	-0.0859676	-0.329958	-0.861561
GSM2235724	GSE84437	10	1	TMEcluster-A	-0.0303412	-0.454589	0.915991	-0.546462	-0.224992	-0.332231	-0.839738	2.04897	0.282951	-0.516642	-0.517977	1.4782	0.866054	-0.84965	0.115062	-0.820313	5.80235	-0.291213	0.512826	-0.153256	-0.0859676	-0.146933	0.882745
GSM2235725	GSE84437	122	0	TMEcluster-C	-0.971767	-0.454589	0.151611	3.44007	-0.224992	-1.54407	3.39858	-1.03184	-0.558429	0.896513	-0.517977	-0.555178	0.487258	-0.41997	0.157391	-0.488713	-0.533336	-0.704704	-1.36445	-0.153256	-0.0859676	-0.329958	0.672864
GSM2235726	GSE84437	1	1	TMEcluster-C	0.0715201	-0.454589	0.66762	0.454006	-0.224992	-0.299705	-0.649056	-0.991118	-0.030852	0.275213	-0.0441162	-0.600402	-0.637976	-0.25605	2.24474	1.32142	-0.533336	-0.704704	-0.228567	-0.153256	-0.0859676	-0.329958	0.346602
GSM2235727	GSE84437	118	0	TMEcluster-A	-0.971767	-0.454589	0.151436	0.444544	-0.224992	-0.0213253	-0.233465	-0.715324	0.349959	1.17418	-0.517977	1.60637	-0.637976	-0.788812	-0.806071	-0.465808	-0.0985597	-0.30495	2.03209	-0.153256	-0.0859676	-0.0824662	-0.84796
GSM2235728	GSE84437	35	1	TMEcluster-A	-0.971767	-0.265654	-0.0955683	0.107859	-0.224992	0.00726289	-0.766207	-0.249358	-0.223587	-0.516642	-0.517977	1.33318	1.51168	-0.934418	-0.079602	-0.953913	-0.533336	1.11831	2.38834	-0.153256	-0.0859676	0.595416	1.35593
GSM2235729	GSE84437	5	1	TMEcluster-C	0.334504	-0.454589	0.0656176	-0.0586495	-0.224992	-0.676143	0.132876	-0.15553	-0.558429	2.1969	-0.517977	-0.306474	0.755588	-0.232805	1.15971	-0.0398041	-0.533336	-0.656914	0.49614	-0.153256	-0.0859676	-0.329958	0.541408
GSM2235730	GSE84437	49	1	TMEcluster-B	1.16588	-0.454589	-0.691399	-0.986612	-0.224992	1.062	-0.80974	-1.06814	1.30239	-0.516642	0.2842	-0.666197	-0.637976	1.54308	-1.12847	0.136819	-0.533336	-0.107364	-0.202012	-0.153256	-0.0859676	-0.329958	-1.06612
GSM2235731	GSE84437	118	0	TMEcluster-C	-0.741951	-0.454589	-0.691399	1.22052	-0.224992	-0.60907	0.932972	1.21044	1.03918	-0.516642	-0.517977	2.84586	0.656351	-0.46289	-1.14574	-1.57407	-0.154477	0.738221	0.235039	-0.153256	-0.0859676	-0.329958	-1.35127
GSM2235732	GSE84437	118	0	TMEcluster-A	-0.444316	-0.454589	2.79458	-0.231616	-0.224992	0.217305	-0.655241	-0.522212	-0.558429	2.29891	-0.517977	0.945408	-0.637976	-0.541669	-0.39855	-0.245006	-0.512819	-0.442644	0.240883	-0.153256	-0.0859676	0.155215	0.675477
GSM2235733	GSE84437	144	0	TMEcluster-B	-0.827773	-0.454589	-0.691399	-1.22841	1.23323	0.881778	0.108992	-1.06814	-0.558429	-0.516642	0.973039	1.73062	-0.637976	1.01697	0.653238	-0.295991	-0.533336	-0.102336	-1.02508	-0.153256	-0.0859676	1.51753	1.33266
GSM2235734	GSE84437	144	0	TMEcluster-A	0.285718	-0.454589	0.155009	-0.866731	-0.224992	0.677818	-0.839738	-1.06814	1.41372	-0.516642	-0.517977	-0.21813	1.57741	-0.464085	-0.884375	-0.551092	1.24587	1.38119	1.67405	-0.153256	-0.0859676	-0.329958	-0.909541
GSM2235735	GSE84437	145	0	TMEcluster-B	-0.971767	0.318987	-0.336622	-0.858504	-0.224992	-0.092738	-0.71363	0.609013	-0.28952	-0.516642	-0.423541	-0.0973441	2.22747	-1.02809	-1.25993	-0.779471	-0.533336	4.87168	-0.922414	-0.153256	-0.0859676	13.894	0.0899235
GSM2235736	GSE84437	9	1	TMEcluster-B	1.18891	-0.454589	-0.691399	0.0231564	-0.224992	-1.54407	-0.839738	-0.293734	3.77073	-0.516642	-0.517977	-0.360633	-0.637976	2.71685	-1.6303	0.787937	-0.533336	0.959441	-1.12402	-0.153256	-0.0859676	1.25641	-2.3832
GSM2235737	GSE84437	45	1	TMEcluster-A	1.55821	1.63103	1.28802	-0.847127	3.01606	0.0435065	-0.839738	-0.965236	-0.558429	-0.516642	-0.397931	-1.10554	-0.637976	0.168157	-1.1604	0.2916	1.92236	0.203936	-0.282607	-0.153256	-0.0859676	0.15437	-0.694792
GSM2235738	GSE84437	153	0	TMEcluster-C	-0.607994	-0.454589	-0.691399	-1.22841	-0.224992	0.187729	3.13659	3.28712	-0.558429	-0.516642	1.2809	-0.0862187	0.0480676	-0.691229	-1.34714	-0.350534	-0.315101	-0.268053	-0.0275085	-0.153256	-0.0859676	-0.329958	-0.000189902
GSM2235739	GSE84437	14	1	TMEcluster-A	-0.853959	-0.40142	-0.691399	-1.22841	-0.224992	1.6556	-0.521787	-1.06814	0.47347	-0.516642	-0.517977	1.84205	-0.637976	0.182739	0.396898	0.513115	-0.533336	0.281683	-0.219884	-0.153256	-0.0859676	-0.329958	-0.652663
GSM2235740	GSE84437	4	1	TMEcluster-C	0.859469	0.310238	-0.691399	-1.22841	-0.224992	0.371791	-0.347677	2.8236	-0.30196	-0.516642	-0.517977	4.12062	-0.617296	-0.133787	-0.953507	-1.78792	-0.533336	-0.0276142	0.261882	-0.153256	-0.0859676	-0.329958	-1.76624
GSM2235741	GSE84437	127	0	TMEcluster-B	0.0130568	-0.454589	-0.399805	-1.22841	1.09898	0.399171	-0.839738	-1.06814	0.235144	-0.516642	-0.517977	0.581705	-0.637976	1.86289	-1.22932	1.89492	-0.533336	0.904267	-0.87943	-0.153256	-0.0859676	-0.284942	0.724155
GSM2235742	GSE84437	3	1	TMEcluster-C	-0.524556	-0.454589	-0.691399	0.387129	-0.224992	-0.669342	0.39721	0.654755	-0.558429	-0.516642	-0.517977	0.325832	-0.637976	0.694174	0.879703	0.0100178	1.09501	-0.704704	0.177872	-0.153256	-0.0859676	-0.329958	0.342713
GSM2235743	GSE84437	4	1	TMEcluster-B	-0.420777	-0.454589	-0.691399	1.35946	-0.224992	-1.11406	-0.633787	-1.06814	-0.384059	-0.516642	-0.517977	1.24765	-0.637976	2.83519	-0.389618	0.498804	-0.533336	-0.704704	-0.98292	-0.153256	-0.0859676	-0.329958	0.24423
GSM2235744	GSE84437	49	1	TMEcluster-A	-0.524816	-0.454589	1.7747	-0.626764	-0.224992	2.14158	-0.839738	-1.06814	0.142132	-0.516642	-0.517977	0.751043	2.03506	-0.577386	-1.40336	-1.4915	0.360932	-0.116271	0.729902	-0.153256	-0.0859676	-0.329958	-0.315388
GSM2235745	GSE84437	106	0	TMEcluster-C	-0.971767	-0.0616165	1.30193	2.5254	-0.224992	-1.09266	1.12827	-0.761903	-0.558429	0.563968	-0.517977	-0.477926	-0.637976	-1.02809	0.660374	1.21158	-0.533336	-0.704704	-0.518904	-0.153256	-0.0859676	-0.329958	-0.314352
GSM2235746	GSE84437	111	0	TMEcluster-A	-0.706114	-0.454589	3.20178	-0.045516	-0.224992	1.11177	-0.534051	1.30536	-0.558429	0.417752	-0.517977	-0.72584	-0.637976	-0.958056	-0.638935	-0.661987	-0.533336	-0.486987	0.408946	-0.153256	-0.0859676	-0.17854	-1.89882
GSM2235747	GSE84437	12	1	TMEcluster-B	-0.971767	-0.355899	-0.691399	0.232336	-0.224992	-0.669318	0.134268	-1.06814	-0.408568	-0.516642	-0.517977	1.01743	-0.637976	1.84142	-0.567702	1.77476	-0.41564	-0.0632277	-0.734333	-0.153256	-0.0859676	0.232477	-0.0263741
GSM2235748	GSE84437	2	1	TMEcluster-C	-0.930202	0.454023	-0.691399	1.27336	-0.224992	-0.155322	0.934891	-0.299636	-0.558429	-0.516642	-0.517977	-0.548944	-0.637976	-1.02809	2.2302	1.66353	-0.207505	-0.704704	-0.805759	-0.153256	-0.0859676	-0.329958	0.710141
GSM2235749	GSE84437	39	1	TMEcluster-C	5.35919	-0.454589	-0.691399	-0.810451	-0.224992	-0.749625	-0.839738	1.86332	0.0501405	1.11066	-0.517977	0.259685	-0.637976	-0.114667	0.930357	-1.67086	-0.533336	-0.239144	-0.38876	-0.153256	-0.0859676	1.34749	-2.27128
GSM2235750	GSE84437	7	1	TMEcluster-B	-0.262534	-0.454589	-0.691399	-1.06378	-0.224992	1.0707	-0.411042	-1.06814	-0.558429	-0.516642	1.61136	-1.0808	-0.637976	2.14731	-1.20499	-0.0633376	-0.533336	1.98629	-0.818694	-0.153256	-0.0859676	-0.329958	0.969936
GSM2235751	GSE84437	101	0	TMEcluster-C	0.5839	-0.454589	-0.691399	-0.389931	-0.224992	-1.30983	1.45281	0.329479	-0.558429	0.930169	-0.517977	-0.19312	-0.2751	-0.552135	2.2532	0.892986	0.774772	-0.473099	0.0672328	-0.153256	-0.0859676	-0.329958	-1.75457
GSM2235752	GSE84437	149	0	TMEcluster-B	-0.538353	-0.454589	0.307728	-0.431399	-0.224992	0.945654	1.42329	-0.0788419	-0.403397	0.0209052	2.20985	-1.10554	0.245326	-0.452393	-0.427656	-0.970969	-0.533336	0.445271	-0.153718	-0.153256	-0.0859676	-0.329958	-2.17813
GSM2235753	GSE84437	31	1	TMEcluster-A	0.31751	-0.454589	1.57322	1.04892	-0.224992	-0.560535	-0.082734	-0.405641	-0.153998	-0.516642	-0.517977	0.305343	0.833582	-0.607458	0.247065	0.0805632	0.317885	-0.704704	0.280966	-0.153256	-0.0859676	-0.329958	0.207747
GSM2235754	GSE84437	138	0	TMEcluster-B	-0.851698	-0.454589	-0.691399	-1.01791	2.40204	0.258298	-0.839738	-1.06814	-0.558429	-0.516642	2.10476	-1.10554	-0.427409	1.93022	-1.43782	1.46044	-0.533336	-0.024122	0.201332	2.55679	-0.0859676	-0.273119	1.43924
GSM2235755	GSE84437	87	1	TMEcluster-A	-0.060824	-0.454589	1.6618	0.160987	-0.224992	-0.15531	-0.839738	0.0402886	0.235354	2.58036	-0.517977	0.626619	-0.637976	-0.924984	-0.247081	-0.611927	-0.143647	-0.704704	1.3174	-0.153256	-0.0859676	-0.329958	1.34285
GSM2235756	GSE84437	140	0	TMEcluster-A	2.05339	-0.454589	0.15892	-1.12081	-0.224992	0.361216	-0.208483	-0.293995	-0.546718	-0.352259	-0.517977	0.0902695	0.535067	0.550579	0.653092	0.0562979	-0.533336	-0.697706	-0.44705	-0.153256	-0.0859676	-0.329958	0.968261
GSM2235757	GSE84437	40	1	TMEcluster-C	-0.10026	-0.454589	1.46292	-0.362707	-0.224992	-0.552625	0.0344111	0.433934	0.467366	-0.516642	-0.198169	-0.876227	-0.637976	0.823429	0.635294	-0.570237	1.00003	-0.704704	0.172137	-0.153256	-0.0859676	0.0168195	0.708014
GSM2235758	GSE84437	13	1	TMEcluster-B	-0.971767	1.65789	-0.691399	-0.855056	-0.224992	-1.54407	-0.839738	-0.370027	1.72136	-0.516642	-0.517977	0.714941	-0.637976	3.40673	-0.947459	-0.343291	-0.533336	-0.121737	0.106292	-0.153256	-0.0859676	-0.211895	-0.935531
GSM2235759	GSE84437	12	1	TMEcluster-A	-0.403791	-0.454589	0.145671	-0.20064	-0.224992	0.894211	-0.839738	0.105053	1.62882	-0.00346451	0.0315679	-1.10554	2.02908	-0.559541	-1.20193	-0.0483665	-0.533336	0.622124	1.05587	-0.153256	-0.0859676	-0.329958	1.68543
GSM2235760	GSE84437	20	1	TMEcluster-C	0.829496	-0.454589	-0.691399	1.72289	-0.224992	-1.54407	-0.21455	0.198431	-0.226759	-0.516642	-0.517977	0.576212	-0.637976	0.304976	-0.191497	0.973815	-0.533336	-0.704704	0.717122	-0.153256	-0.0859676	-0.329958	1.01898
GSM2235761	GSE84437	134	0	TMEcluster-A	-0.0413619	3.62488	-0.691399	1.39842	-0.224992	-0.767766	-0.200448	0.653996	-0.558429	-0.516642	-0.517977	0.0101292	-0.274431	-0.941558	-0.74407	0.0291265	-0.533336	-0.207732	0.401959	-0.153256	-0.0859676	-0.329958	1.08707
GSM2235762	GSE84437	39	1	TMEcluster-B	-0.77302	-0.454589	-0.691399	-0.69761	-0.224992	-0.433961	-0.839738	-0.937707	1.06243	-0.516642	-0.517977	0.682547	-0.637976	2.08603	-0.46438	0.14402	0.764188	-0.704704	1.10409	-0.153256	-0.0859676	0.17448	-0.109917
GSM2235763	GSE84437	109	1	TMEcluster-C	0.378149	0.20962	-0.691399	0.883967	-0.224992	0.17167	-0.606899	0.622599	1.28044	-0.516642	0.165341	-0.771574	-0.637976	0.101052	1.02476	-1.23609	-0.392714	0.130029	-0.260033	-0.153256	-0.0859676	-0.329958	-0.223062
GSM2235764	GSE84437	9	1	TMEcluster-C	0.00867611	-0.454589	-0.337624	1.58157	-0.224992	-1.54407	-0.839738	2.02784	-0.264546	-0.516642	-0.517977	2.25391	-0.637976	-1.02809	-0.647277	-0.866087	-0.533336	5.08633	0.42662	-0.153256	-0.0859676	1.25766	-1.65785
GSM2235765	GSE84437	138	0	TMEcluster-B	0.524922	-0.454589	0.987607	-0.844998	-0.224992	-0.62264	-0.34701	-1.06814	1.15269	-0.516642	0.628187	-1.04092	-0.637976	1.8212	-0.182477	0.625949	-0.533336	0.0120059	-0.234425	-0.153256	-0.0859676	-0.329958	1.37689
GSM2235766	GSE84437	15	1	TMEcluster-B	1.25662	-0.454589	1.03158	-1.22841	-0.224992	-0.263343	-0.426037	-0.134069	-0.438518	-0.516642	0.0921489	-0.404094	-0.637976	1.07089	-0.61026	0.703728	-0.533336	2.03939	-0.538495	-0.153256	-0.0859676	-0.329958	-0.966589
GSM2235767	GSE84437	18	1	TMEcluster-A	-0.381297	-0.117768	-0.691399	0.676551	-0.224992	0.373147	-0.839738	-1.06814	-0.329823	-0.225548	-0.517977	0.182474	0.606129	-1.02809	-0.121835	0.290328	-0.533336	-0.704704	2.5745	-0.153256	-0.0859676	0.160535	1.19778
GSM2235768	GSE84437	144	0	TMEcluster-C	-0.677847	-0.423068	-0.691399	0.840673	-0.224992	-1.54407	2.1564	0.29589	-0.354642	-0.516642	1.33964	0.0170447	-0.637976	0.100191	1.71264	-0.263953	0.314519	-0.359803	-0.337036	-0.153256	-0.0859676	-0.329958	1.07559
GSM2235769	GSE84437	22	1	TMEcluster-B	0.584834	-0.454589	-0.288299	-0.438714	-0.224992	-0.817276	-0.566506	0.851949	-0.172618	-0.516642	-0.517977	0.309086	-0.637976	2.54228	-0.49951	0.478713	-0.533336	-0.704704	-1.63924	9.62322	-0.0859676	-0.329958	0.00308072
GSM2235770	GSE84437	7	1	TMEcluster-C	-0.96005	-0.23723	-0.301741	1.00311	-0.224992	-1.11254	-0.839738	-0.296817	0.937328	2.24332	-0.517977	2.29865	-0.637976	-0.521904	0.38599	-1.23132	-0.533336	-0.704704	2.07362	-0.153256	-0.0859676	0.367843	-0.0436746
GSM2235771	GSE84437	143	0	TMEcluster-C	-0.668918	1.87858	-0.691399	1.58826	-0.224992	-0.75195	0.0917268	-0.278626	-0.558429	-0.516642	-0.517977	1.60902	-0.637976	-0.588884	-0.04134	-0.623944	-0.533336	-0.507371	0.761397	-0.153256	-0.0859676	0.174726	0.502499
GSM2235772	GSE84437	60	1	TMEcluster-A	0.485859	1.3605	-0.596093	-0.0158197	-0.224992	-0.632465	-0.803886	0.120953	0.605923	1.5766	-0.517977	-0.149715	-0.637976	-0.0744762	0.666855	-0.581403	-0.533336	1.07681	0.0634237	-0.153256	-0.0859676	0.0792471	0.842871
GSM2235773	GSE84437	17	1	TMEcluster-C	0.346878	0.636559	-0.119314	0.615283	-0.224992	-1.0433	-0.233907	0.827389	0.596335	-0.516642	-0.517977	1.73819	-0.637976	-0.233792	0.379653	-0.469939	-0.533336	1.11108	-0.230074	-0.153256	-0.0859676	-0.0790786	0.819123
GSM2235774	GSE84437	12	1	TMEcluster-C	-0.350158	-0.454589	-0.275906	-0.790491	-0.224992	-0.278527	0.550418	-0.132543	-0.558429	0.682035	-0.517977	0.911963	-0.630859	0.0207653	1.52074	0.382953	0.270901	-0.453825	0.169977	-0.153256	-0.0859676	-0.329958	0.63421
GSM2235775	GSE84437	120	0	TMEcluster-A	-0.701384	-0.201498	-0.691399	-0.125338	-0.224992	-0.0755373	0.683055	-0.859789	-0.558429	-0.516642	0.0283608	0.807417	0.584661	-0.199334	0.636284	-1.06165	-0.31689	-0.430122	1.8581	-0.153256	-0.0859676	-0.329958	0.51912
GSM2235776	GSE84437	20	1	TMEcluster-C	0.142466	-0.454589	-0.20325	1.60373	-0.224992	-1.01035	0.0691528	0.154661	-0.558429	0.0227849	-0.517977	2.03714	-0.232724	-0.161922	0.204963	-0.276348	-0.533336	-0.702174	0.308145	-0.153256	-0.0859676	-0.329958	0.73687
GSM2235777	GSE84437	115	1	TMEcluster-C	-0.603112	-0.454589	-0.691399	0.189104	-0.224992	-1.54407	1.00281	0.614798	-0.558429	1.10268	-0.517977	2.39464	-0.637976	-0.0719275	0.878949	0.351014	-0.533336	-0.413812	0.442397	-0.153256	-0.0859676	-0.329958	0.67931
GSM2235778	GSE84437	23	1	TMEcluster-B	-0.0509214	-0.454589	-0.691399	-0.125236	-0.224992	-0.507832	-0.839738	-1.06814	0.057796	-0.516642	-0.517977	0.933616	-0.590501	2.68241	-0.545544	1.2098	-0.533336	-0.236824	-1.11683	2.472	-0.0859676	-0.329958	0.294434
GSM2235779	GSE84437	49	1	TMEcluster-C	-0.72851	-0.454589	-0.691399	1.78301	-0.224992	-1.54407	3.00876	0.0183903	-0.558429	-0.516642	-0.517977	0.00879656	0.000549048	-0.550732	0.43638	1.2372	-0.533336	-0.683254	-0.408499	-0.153256	-0.0859676	-0.329958	-0.101543
GSM2235781	GSE84437	115	0	TMEcluster-B	-0.0624986	-0.454589	-0.398245	-1.1286	-0.224992	0.42813	0.387256	-0.365779	-0.558429	-0.516642	1.75042	-1.10554	-0.637976	1.66929	-0.264299	-0.433081	-0.533336	-0.189992	0.0340748	-0.153256	-0.0859676	-0.329958	0.357078
GSM2235782	GSE84437	4	1	TMEcluster-C	-0.265513	-0.454589	1.60099	0.0314728	-0.224992	-0.916563	0.0290864	-0.71075	-0.558429	-0.516642	-0.273867	0.348324	-0.637976	0.976	1.1147	0.777839	-0.533336	0.917511	-1.1431	-0.153256	-0.0859676	-0.329958	1.60282
GSM2235783	GSE84437	75	1	TMEcluster-A	0.212084	-0.454589	1.36223	1.43348	-0.224992	-0.161155	-0.839738	-0.22069	-0.558429	-0.516642	-0.517977	-0.0717067	-0.637976	0.0711897	-0.0205124	-0.889573	-0.533336	-0.341892	0.781031	-0.153256	-0.0859676	-0.329958	1.37548
GSM2235784	GSE84437	103	1	TMEcluster-C	-0.343239	-0.454589	-0.691399	1.62108	-0.224992	-1.54407	2.79192	-0.130169	-0.558429	-0.516642	0.251942	0.0175941	-0.637976	-0.392502	0.581997	0.0912132	0.726858	-0.250053	-0.206651	-0.153256	-0.0859676	-0.329958	0.189701
GSM2235785	GSE84437	114	0	TMEcluster-B	-0.971767	-0.399538	0.824111	-0.201519	-0.224992	-0.657072	1.9339	0.0979758	-0.558429	-0.516642	5.43492	-1.10554	-0.637976	-0.369873	0.734918	-0.871812	-0.533336	-0.686164	0.0441737	-0.153256	-0.0859676	0.919954	-0.308284
GSM2235786	GSE84437	108	0	TMEcluster-A	2.18101	2.28268	0.220123	2.42603	-0.224992	-0.897668	-0.359192	0.00779865	-0.558429	1.15843	-0.517977	-1.10554	-0.637976	-1.02809	-1.02034	0.266148	-0.533336	-0.529485	-0.736879	-0.153256	-0.0859676	-0.329958	0.913247
GSM2235787	GSE84437	25	1	TMEcluster-A	0.284279	-0.454589	-0.314185	-0.605919	-0.224992	1.86648	-0.712843	-0.412941	0.363527	-0.256046	-0.517977	-0.717658	-0.637976	-0.810882	-0.193131	-0.00377783	-0.533336	0.456612	1.02216	-0.153256	-0.0859676	-0.329958	0.837967
GSM2235788	GSE84437	117	0	TMEcluster-C	-0.382128	-0.454589	1.6906	-0.0448973	-0.224992	-0.249163	-0.117024	0.00564585	0.141196	2.12993	-0.517977	0.318655	-0.637976	-0.495906	0.625347	-0.605284	-0.237069	0.320963	0.00279596	-0.153256	-0.0859676	-0.329958	-0.914524
GSM2235789	GSE84437	37	1	TMEcluster-C	-0.499064	-0.253569	-0.691399	-0.0776953	-0.224992	-1.11281	0.611921	2.08365	-0.558429	2.61312	-0.517977	0.829002	-0.578193	-0.570165	0.682542	-0.64395	0.0060907	-0.133089	0.87416	-0.153256	-0.0859676	-0.329958	-0.173692
GSM2235790	GSE84437	119	0	TMEcluster-A	1.83772	2.45831	0.298729	-0.123578	-0.224992	1.10297	-0.262749	-0.485886	-0.558429	-0.516642	-0.517977	-1.10554	-0.637976	-0.290315	-0.0694618	-1.43177	-0.533336	-0.193341	-0.689672	-0.153256	-0.0859676	-0.329958	-0.977968
GSM2235791	GSE84437	25	1	TMEcluster-A	0.159375	-0.454589	0.0190962	-0.852387	-0.224992	1.63993	-0.77062	-0.477715	-0.393166	1.32383	-0.517977	-0.296854	-0.637976	-1.02809	0.934768	0.827213	-0.533336	-0.625095	0.340776	-0.153256	-0.0859676	-0.329958	0.781075
GSM2235792	GSE84437	92	1	TMEcluster-A	-0.888367	-0.128353	-0.691399	-1.22841	-0.224992	1.56223	-0.627607	-1.06814	-0.558429	-0.439832	-0.517977	0.935047	2.23232	-1.02809	0.00386032	1.32277	0.0228081	1.69918	0.347894	-0.153256	-0.0859676	-0.329958	0.317938
GSM2235793	GSE84437	87	1	TMEcluster-A	-0.907227	-0.454589	2.92423	-1.20226	-0.224992	0.753829	-0.414451	-1.06814	-0.558429	1.04794	-0.517977	-0.677215	0.152093	-0.204618	-0.678235	-0.376289	-0.399475	-0.141023	1.56838	-0.153256	-0.0859676	-0.329958	1.28932
GSM2235794	GSE84437	121	0	TMEcluster-A	-0.60177	-0.454589	-0.691399	-0.361774	-0.224992	1.2217	0.269215	-1.06814	-0.558429	-0.516642	-0.517977	0.604502	0.359649	-0.141732	1.1052	-0.638632	0.401592	-0.382191	0.300755	-0.153256	-0.0859676	-0.329958	0.143851
GSM2235795	GSE84437	121	0	TMEcluster-B	-0.89442	-0.454589	-0.691399	-1.19511	-0.224992	0.381283	-0.839738	-1.06814	-0.558429	-0.516642	1.01368	-1.04031	3.88126	1.22246	-1.6303	2.01849	-0.533336	3.57717	-1.07504	-0.153256	-0.0859676	1.07567	1.34619
GSM2235796	GSE84437	44	1	TMEcluster-A	0.232074	-0.454589	-0.473416	-0.198867	-0.224992	0.665643	-0.839738	-1.06814	-0.558429	-0.516642	-0.517977	0.746363	3.34525	-0.918947	-0.860942	-0.225589	-0.533336	-0.256839	2.42866	-0.153256	-0.0859676	0.161465	1.43282
GSM2235797	GSE84437	115	0	TMEcluster-C	-0.591548	-0.415792	-0.691399	1.73559	-0.224992	-1.54407	1.17357	0.372404	-0.195177	-0.516642	3.23517	-1.10062	1.53513	0.563565	0.525888	-0.698011	-0.267153	-0.228012	-0.602469	-0.153256	-0.0859676	-0.329958	-0.879397
GSM2235798	GSE84437	25	1	TMEcluster-B	0.0847583	-0.454589	-0.0938398	-0.563393	-0.224992	0.0406843	0.00377545	0.616977	-0.558429	-0.516642	1.39702	-1.10554	-0.637976	-0.722303	-0.00522298	0.811886	-0.533336	3.55963	-0.0779881	-0.153256	-0.0859676	0.793733	-0.0444376
GSM2235799	GSE84437	12	1	TMEcluster-A	0.411955	-0.454589	0.981428	-0.0379267	-0.224992	0.627606	-0.0483755	-0.181971	-0.558429	-0.516642	0.162777	-1.10554	0.0666549	-0.805965	0.17392	-0.0877019	-0.533336	0.38197	0.567211	-0.153256	-0.0859676	0.33668	-0.923636
GSM2235800	GSE84437	114	0	TMEcluster-C	-0.0485769	-0.436381	-0.691399	2.16728	-0.224992	-0.742675	-0.290905	0.532151	-0.0238454	0.115028	-0.517977	0.174218	-0.637976	-0.495649	0.814382	0.281047	-0.533336	-0.704704	0.337971	-0.153256	-0.0859676	-0.329958	1.60402
GSM2235801	GSE84437	113	0	TMEcluster-A	1.23914	1.73046	-0.691399	0.0379797	-0.224992	-0.228977	-0.839738	0.937696	2.58352	-0.516642	-0.381504	-0.185393	1.53855	-0.616178	-0.955841	-0.544138	-0.533336	0.716028	0.113294	-0.153256	-0.0859676	-0.329958	0.785375
GSM2235802	GSE84437	106	0	TMEcluster-C	0.192985	-0.454589	-0.691399	-1.09844	-0.224992	-0.0754849	0.479448	-0.107646	-0.558429	1.1654	-0.517977	0.487966	-0.637976	-0.0299795	0.81191	0.0627643	-0.236356	1.68649	0.0747997	-0.153256	-0.0859676	-0.329958	-2.07444
GSM2235803	GSE84437	107	0	TMEcluster-A	0.447678	-0.454589	-0.454158	-1.22841	-0.224992	1.20511	0.327656	0.492473	-0.558429	1.96634	-0.517977	0.0154515	-0.637976	-0.438521	-0.0420982	0.129741	-0.533336	-0.691544	-0.0181268	-0.153256	-0.0859676	-0.329958	-1.06239
GSM2235804	GSE84437	114	0	TMEcluster-C	-0.971767	0.133393	-0.691399	0.738058	-0.224992	-0.834946	-0.667609	-0.341968	1.13655	4.54014	-0.517977	0.0158351	-0.637976	-0.84901	1.17635	0.208916	1.04549	-0.278102	0.416138	-0.153256	-0.0859676	-0.329958	0.386171
GSM2235805	GSE84437	5	1	TMEcluster-A	0.422041	-0.418119	-0.691399	-0.128837	-0.224992	1.59768	-0.839738	-0.56814	0.445172	-0.516642	-0.517977	-0.755756	-0.637976	-0.8606	-0.0597873	-0.118797	2.5078	-0.286449	1.02288	-0.153256	-0.0859676	0.0479184	0.823789
GSM2235806	GSE84437	101	1	TMEcluster-A	-0.971767	0.195019	-0.691399	-0.27101	-0.224992	-0.115535	-0.839738	0.209331	3.01888	-0.516642	-0.517977	0.740077	-0.615618	-0.543012	-1.21861	4.2718	-0.533336	1.30651	-0.742708	-0.153256	-0.0859676	-0.329958	-2.47107
GSM2235807	GSE84437	33	1	TMEcluster-A	-0.971767	0.744992	-0.691399	-1.22841	-0.224992	0.399719	0.187585	-1.06814	-0.558429	-0.516642	1.16668	-0.362907	0.0662029	-0.562554	0.974086	0.0325144	-0.533336	0.103666	1.9914	-0.153256	-0.0859676	-0.329958	-0.217812
GSM2235808	GSE84437	23	1	TMEcluster-C	0.477268	-0.454589	-0.691399	0.441363	-0.224992	-1.54407	0.257753	2.30336	0.102003	-0.516642	-0.517977	1.58399	0.392654	-0.342381	1.1381	-0.893933	1.6977	-0.612982	0.682148	-0.153256	-0.0859676	-0.329958	-0.397279
GSM2235809	GSE84437	146	0	TMEcluster-C	-0.21414	-0.454589	0.917942	1.74543	-0.224992	-1.54407	1.95275	1.03955	-0.194397	1.4178	-0.517977	0.432688	0.244712	-0.691629	0.493272	-0.284977	-0.533336	-0.515471	-1.41136	-0.153256	-0.0859676	0.431898	-0.683939
GSM2235810	GSE84437	7	1	TMEcluster-B	-0.971767	1.84217	-0.691399	-0.407153	-0.224992	0.198418	-0.839738	-1.06194	-0.558429	-0.516642	1.61963	-1.10554	-0.637976	1.39363	0.518177	0.616766	-0.533336	-0.0935599	-1.31385	0.148055	-0.0859676	2.6003	0.199674
GSM2235811	GSE84437	12	1	TMEcluster-A	0.659354	-0.454589	0.576005	0.557337	-0.224992	0.457831	-0.0128048	0.147082	-0.123134	-0.516642	0.204892	-1.10554	-0.0514751	-0.409576	-0.138002	-0.529716	0.615768	-0.704704	0.12514	-0.153256	-0.0859676	0.812014	0.531258
GSM2235812	GSE84437	34	1	TMEcluster-C	-0.556661	-0.454589	0.563778	1.16333	-0.224992	-0.44551	0.158485	0.975473	-0.558429	-0.516642	0.787808	-0.961606	-0.637976	-0.11806	0.405279	0.459534	0.830233	-0.704704	-0.211735	-0.153256	-0.0859676	-0.329958	0.284214
GSM2235813	GSE84437	26	1	TMEcluster-B	1.88779	-0.454589	-0.691399	-1.22841	-0.224992	0.807949	-0.839738	2.92794	1.71986	-0.516642	1.84109	-1.02461	1.27931	-0.0636045	-0.265982	-0.752743	-0.533336	0.311887	-0.932251	-0.153256	-0.0859676	-0.329958	-1.18976
GSM2235814	GSE84437	113	0	TMEcluster-A	1.36049	0.735774	0.518055	-0.505105	-0.224992	0.488119	-0.835899	0.0254702	-0.558429	1.35542	-0.517977	-0.615927	-0.637976	-0.409029	0.209008	-0.695582	-0.533336	-0.626683	0.626387	-0.153256	-0.0859676	-0.329958	0.560913
GSM2235815	GSE84437	113	0	TMEcluster-A	-0.362668	-0.454589	1.82443	-0.734022	-0.224992	0.130432	0.957318	-0.431271	-0.558429	-0.516642	-0.517977	0.955142	-0.637976	-0.342935	-0.431913	-0.0883746	-0.228824	0.426236	0.415766	-0.153256	-0.0859676	-0.288992	-0.871568
GSM2235816	GSE84437	4	1	TMEcluster-A	0.673141	-0.454589	-0.691399	-0.358339	-0.224992	0.0389066	-0.839738	-0.717296	-0.302479	-0.516642	-0.517977	1.86589	-0.637976	-0.414051	2.09985	-0.259313	-0.533336	-0.704704	0.908014	-0.153256	-0.0859676	1.55366	0.400355
GSM2235817	GSE84437	55	1	TMEcluster-A	-0.0814641	-0.454589	-0.691399	-1.19494	-0.224992	1.76796	-0.345545	-0.64165	-0.558429	-0.110826	-0.517977	-0.656175	-0.637976	0.213697	0.500409	1.06329	1.51579	-0.324074	-0.509423	-0.153256	-0.0859676	-0.329958	-0.224146
GSM2235818	GSE84437	10	1	TMEcluster-C	-0.620168	-0.454589	-0.691399	0.294964	-0.224992	-1.49664	2.53851	0.233741	-0.558429	0.312711	-0.517977	0.663069	0.47169	-0.526724	1.35282	-0.294457	0.0336542	-0.0106155	0.424591	-0.153256	-0.0859676	-0.116556	-0.0648536
GSM2235819	GSE84437	21	1	TMEcluster-B	-0.176658	-0.454589	-0.176015	-0.908752	-0.224992	-0.00912218	-0.718905	-0.957013	-0.558429	-0.516642	0.106149	-1.07967	-0.637976	2.9384	-0.654412	-0.106073	-0.533336	0.777516	0.0273451	-0.153256	-0.0859676	-0.329958	0.881794
GSM2235820	GSE84437	24	1	TMEcluster-A	0.53312	1.22325	1.11965	0.306622	-0.224992	-0.145127	-0.835178	0.701277	-0.558429	-0.347706	-0.517977	-0.465882	-0.54283	-0.605321	-0.652128	-0.662929	-0.29367	-0.564551	1.56516	-0.153256	-0.0859676	-0.329958	1.03359
GSM2235821	GSE84437	112	0	TMEcluster-C	-0.51076	-0.454589	-0.691399	2.56349	-0.224992	-1.54407	1.8603	0.264364	-0.362464	-0.516642	-0.517977	-0.645324	0.984262	-0.460585	0.491737	-0.568142	0.783335	0.15701	0.0816354	-0.153256	-0.0859676	-0.329958	-0.326787
GSM2235822	GSE84437	112	0	TMEcluster-B	-0.185403	-0.454589	-0.691399	-0.651087	-0.224992	-0.424148	-0.422709	0.515355	-0.558429	-0.516642	-0.328371	0.252134	-0.529435	1.37133	0.258167	0.651953	2.61937	1.65413	-0.941138	-0.153256	-0.0859676	-0.329958	-0.282672
GSM2235823	GSE84437	9	1	TMEcluster-A	0.200508	0.0064188	0.0272279	-0.00814818	-0.224992	1.21942	-0.353081	0.558532	-0.558429	1.53657	-0.517977	-0.918317	-0.637976	-0.872809	-0.0842968	-0.53931	-0.0364654	-0.249689	0.342446	-0.153256	-0.0859676	-0.329958	0.926112
GSM2235824	GSE84437	79	1	TMEcluster-A	0.733348	1.59437	-0.398243	1.69586	-0.224992	0.3741	-0.463414	-0.432133	-0.558429	-0.516642	-0.517977	-1.10554	-0.393816	-0.755541	-0.243792	-0.53501	-0.533336	0.921405	-0.154938	-0.153256	-0.0859676	-0.329958	1.35285
GSM2235825	GSE84437	23	1	TMEcluster-A	0.189464	-0.454589	-0.691399	-0.952399	-0.224992	0.1201	-0.0907505	-1.06814	-0.558429	-0.516642	-0.517977	0.84373	3.74938	-0.977556	0.741387	1.96342	-0.0132636	-0.704704	0.896531	-0.153256	-0.0859676	-0.146064	1.34468
GSM2235826	GSE84437	11	1	TMEcluster-C	-0.971767	0.125	-0.691399	-1.22841	-0.224992	-0.910123	-0.0213827	3.13462	-0.538496	0.328383	0.445606	-0.829912	3.50647	-0.39937	2.97609	0.22678	-0.533336	-0.528368	0.0605295	-0.153256	-0.0859676	-0.329958	0.738942
GSM2235827	GSE84437	43	1	TMEcluster-A	-0.897007	0.717404	0.224247	1.44033	-0.224992	-0.600267	-0.839738	0.35201	-0.558429	0.58245	-0.517977	-0.921574	-0.342774	-1.02809	-0.83715	-0.784322	0.70709	-0.0674326	3.07663	-0.153256	-0.0859676	-0.329958	1.63221
GSM2235828	GSE84437	107	0	TMEcluster-B	-0.671688	-0.454589	-0.691399	-1.22841	-0.224992	-0.208463	0.255652	-0.576991	-0.558429	0.701392	-0.517977	1.02329	-0.637976	2.26669	0.915041	0.0842076	0.0651057	-0.704704	-0.895541	-0.153256	-0.0859676	-0.329958	0.313082
GSM2235829	GSE84437	109	0	TMEcluster-C	0.28878	-0.454589	-0.691399	-0.228437	-0.224992	-0.155135	0.0501408	-0.0423828	0.980738	0.942786	-0.517977	-0.074636	-0.637976	-0.156782	1.82995	-0.20108	-0.321123	-0.263078	0.0921666	-0.153256	-0.0859676	-0.329958	-0.247843
GSM2235830	GSE84437	98	0	TMEcluster-B	-0.453641	-0.454589	4.30278	-1.22841	-0.224992	0.022014	-0.337762	0.417934	-0.501843	-0.516642	-0.517977	1.14219	-0.637976	0.105984	0.152697	-1.53242	-0.533336	1.13472	-0.329293	-0.153256	-0.0859676	1.35858	-0.334463
GSM2235831	GSE84437	39	1	TMEcluster-A	1.0997	-0.454589	-0.691399	0.221347	-0.224992	-0.547105	-0.839738	0.405596	-0.558429	-0.516642	-0.517977	0.0662734	-0.637976	0.324714	0.414195	-0.703026	-0.533336	0.520298	1.64139	-0.153256	-0.0859676	-0.302292	-0.881924
GSM2235837	GSE84437	113	0	TMEcluster-A	-0.198324	1.00609	-0.691399	-0.595122	-0.224992	0.440337	-0.839738	-1.06814	0.290219	0.414623	-0.517977	-0.0623864	-0.637976	0.0622733	-0.113025	1.26613	-0.392367	-0.704704	0.812992	-0.153256	-0.0859676	-0.329958	0.283961
GSM2235838	GSE84437	4	1	TMEcluster-A	3.36319	-0.454589	-0.691399	-0.457907	-0.224992	0.124632	-0.839738	0.731063	2.20369	-0.516642	-0.517977	1.05655	-0.637976	-0.113106	1.04806	-1.39281	-0.533336	-0.521716	-0.337715	-0.153256	-0.0859676	-0.275833	1.09812
GSM2235839	GSE84437	101	1	TMEcluster-C	3.72133	-0.454589	-0.000646407	-0.874456	-0.224992	-1.27615	-0.839738	3.05428	0.0306621	-0.516642	-0.517977	1.52244	-0.637976	-0.0536209	2.35551	-0.727042	-0.533336	-0.634917	-0.635248	-0.153256	-0.0859676	-0.329958	0.573526
GSM2235840	GSE84437	92	1	TMEcluster-B	-0.342425	-0.454589	-0.691399	-1.22841	-0.224992	2.0838	0.168089	-0.827258	-0.558429	-0.516642	0.816465	-1.10554	-0.345016	2.13286	-0.411333	-1.10421	-0.533336	-0.0428151	-1.34405	-0.153256	-0.0859676	-0.309983	-0.418089
GSM2235841	GSE84437	16	1	TMEcluster-A	-0.496767	-0.454589	-0.691399	0.232806	-0.224992	-0.256797	-0.839738	-0.788536	-0.558429	-0.516642	-0.517977	0.164406	0.959826	-0.548232	-0.676564	0.116069	0.475442	-0.704704	3.54697	-0.153256	-0.0859676	1.07902	0.332546
GSM2235842	GSE84437	14	1	TMEcluster-A	1.72174	-0.454589	0.607377	-0.356171	-0.224992	-0.845578	-0.839738	1.26307	-0.558429	0.774908	-0.517977	0.0852805	-0.637976	-0.728598	0.146981	-0.0589422	-0.533336	2.35921	0.698892	-0.153256	-0.0859676	0.206768	0.745389
GSM2235843	GSE84437	13	1	TMEcluster-A	0.0851939	1.10801	-0.691399	-0.823963	-0.224992	7.56847e-05	-0.452674	0.375235	-0.140937	-0.516642	-0.517977	-0.639178	1.42878	-0.378286	-0.397141	-0.166186	0.296051	-0.00878364	1.96498	-0.153256	-0.0859676	-0.329958	0.0439048
GSM2235844	GSE84437	102	0	TMEcluster-C	-0.279901	-0.454589	-0.691399	0.674647	-0.224992	-0.87933	1.96646	0.164973	-0.558429	-0.232726	-0.517977	0.0092492	0.905399	-0.482654	1.63933	-0.582498	-0.170319	-0.439148	0.196471	-0.153256	-0.0859676	-0.329958	-0.460734
GSM2235845	GSE84437	31	1	TMEcluster-C	-0.246385	-0.356976	-0.691399	0.588752	-0.224992	-0.92568	-0.29707	-0.965913	0.214635	-0.111902	-0.517977	1.80205	-0.637976	0.483666	2.07937	-0.291793	0.264841	-0.704704	0.31647	-0.153256	-0.0859676	-0.329958	0.307299
GSM2235846	GSE84437	92	1	TMEcluster-B	0.25357	-0.454589	-0.691399	-1.0981	-0.224992	2.32252	0.0237386	0.0760338	-0.397098	-0.516642	0.175752	-1.10554	-0.637976	0.315962	0.0900933	-0.915446	0.906725	-0.704704	-0.323995	-0.153256	-0.0859676	-0.193621	-1.03119
GSM2235847	GSE84437	111	0	TMEcluster-C	-0.759854	-0.454589	-0.177263	0.540509	-0.224992	-0.521607	2.83714	1.44049	-0.474798	0.266841	0.401846	-0.834009	-0.637976	-0.814144	1.10841	-0.265065	-0.390288	-0.599864	-0.847907	-0.153256	-0.0859676	0.581335	0.618335
GSM2235848	GSE84437	40	1	TMEcluster-A	-0.347824	1.11277	0.00205411	-0.0703287	-0.224992	1.2648	-0.626371	-0.111961	-0.558429	1.91055	-0.517977	-1.10554	-0.637976	-1.02809	-0.468303	0.907955	-0.533336	-0.412122	0.0687181	-0.153256	-0.0859676	-0.329958	1.50533
GSM2235849	GSE84437	1	1	TMEcluster-A	-0.0213126	0.0235043	2.33686	-0.642025	-0.224992	0.968366	-0.718922	0.61927	-0.558429	0.397217	-0.517977	-0.719767	-0.535126	-0.64058	-0.622358	-0.508247	-0.392025	0.776582	0.380304	-0.153256	-0.0859676	-0.329958	1.24588
GSM2235850	GSE84437	116	0	TMEcluster-A	1.03051	0.0262293	1.45347	0.442109	-0.224992	1.1364	-0.839738	-1.06814	-0.086685	-0.516642	0.057708	-1.07915	0.570672	-0.0990886	-0.74676	-0.696145	-0.533336	-0.0643159	-0.223371	-0.153256	-0.0859676	-0.329958	0.862242
GSM2235851	GSE84437	93	1	TMEcluster-B	-0.864383	-0.454589	3.56302	-0.0337179	-0.224992	1.62869	-0.248109	-0.756028	-0.558429	-0.516642	0.493856	-1.10554	0.557433	-0.459668	-0.680767	-0.782779	0.144527	-0.222843	-0.72623	-0.153256	-0.0859676	0.675783	-0.524129
GSM2235852	GSE84437	48	1	TMEcluster-A	3.21795	4.57726	-0.691399	1.23412	-0.224992	0.0359194	-0.270894	0.0228593	-0.558429	-0.516642	-0.252022	-1.10554	-0.637894	-0.739393	-1.31531	-1.33345	-0.533336	0.719388	-1.46192	-0.153256	-0.0859676	-0.329958	0.511198
GSM2235853	GSE84437	111	0	TMEcluster-C	0.229418	-0.454589	-0.357772	1.59575	-0.224992	-1.51296	1.56257	1.3097	0.0108389	-0.516642	-0.00503144	-0.149082	-0.228229	-0.325173	0.623245	-0.828613	-0.347717	-0.25074	0.229043	-0.153256	-0.0859676	-0.329958	-0.282803
GSM2235854	GSE84437	111	0	TMEcluster-A	-0.971767	-0.432521	1.00252	0.481735	-0.224992	1.10346	0.35724	-0.525966	-0.558429	-0.516642	-0.517977	-1.10554	-0.637976	-0.595874	-0.847043	-0.453377	3.22773	-0.704704	0.91515	-0.153256	-0.0859676	-0.329958	0.394139
GSM2235855	GSE84437	110	0	TMEcluster-C	0.446155	0.991671	-0.691399	0.966795	-0.224992	-1.04469	0.372764	1.64309	-0.558429	2.60719	-0.517977	-1.10554	-0.637976	-0.335257	1.37633	-1.23481	0.153058	-0.579345	-0.358659	-0.153256	-0.0859676	-0.329958	-0.207119
GSM2235862	GSE84437	85	1	TMEcluster-C	-0.507987	-0.454589	-0.217799	1.06015	-0.224992	-1.38528	1.24504	0.720917	0.367846	1.5321	-0.517977	1.61344	-0.637976	0.192085	1.17631	-0.780926	0.113069	-0.704704	-1.04295	-0.153256	-0.0859676	-0.329958	0.152675
GSM2235863	GSE84437	133	0	TMEcluster-A	-0.971767	0.55954	-0.691399	-0.229178	-0.224992	0.376982	-0.839738	0.358909	-0.558429	-0.516642	-0.517977	0.301232	2.9893	-0.757632	-0.166923	1.91703	2.28614	0.700202	-0.439219	-0.153256	-0.0859676	-0.329958	0.998113
GSM2235864	GSE84437	12	1	TMEcluster-A	-0.276061	-0.454589	1.56257	-0.506476	-0.224992	1.18417	-0.839738	-0.696904	-0.558429	0.467165	-0.517977	-0.657052	-0.348586	-0.359867	-1.13251	-0.0544828	-0.533336	0.132423	1.43934	-0.153256	-0.0859676	-0.329958	0.0625943
GSM2235865	GSE84437	33	1	TMEcluster-B	-0.74556	-0.392467	1.65402	-1.05917	-0.224992	-0.419976	-0.557529	2.34118	0.152614	1.43994	1.71137	-1.10554	4.83931	0.278575	-1.12645	-0.78616	-0.010155	0.230058	-0.350654	-0.153256	-0.0859676	-0.329958	-0.832275
GSM2235866	GSE84437	129	0	TMEcluster-A	-0.333337	-0.454589	-0.621688	0.637772	-0.224992	-0.659887	-0.832909	-0.749229	0.693981	-0.516642	-0.517977	1.16633	-0.193734	0.524219	0.461062	1.70794	-0.533336	-0.704704	-0.268478	-0.153256	-0.0859676	1.74693	1.04373
GSM2235867	GSE84437	125	0	TMEcluster-C	0.36435	-0.454589	-0.691399	-0.43089	-0.224992	-0.133091	0.784203	-0.479457	-0.495675	0.170871	-0.517977	-0.0528147	1.58474	-0.610779	1.78181	-0.0317437	0.306354	-0.262383	0.355068	-0.153256	-0.0859676	-0.329958	0.61948
GSM2235878	GSE84437	125	0	TMEcluster-B	-0.562855	-0.454589	0.856036	0.123052	-0.224992	-0.0131196	-0.0396406	-1.06814	-0.558429	-0.516642	-0.517977	0.556287	-0.637976	1.54455	-0.681482	-0.362373	-0.533336	-0.289014	-0.112405	-0.153256	-0.0859676	0.413364	-0.564265
GSM2235879	GSE84437	6	1	TMEcluster-A	-0.660528	-0.376071	-0.691399	-0.136101	-0.224992	-0.650065	0.465143	-0.493682	-0.391356	-0.0531669	-0.517977	-0.575289	1.1171	-0.255775	-0.0489407	1.38596	1.17667	1.91519	0.623685	-0.153256	-0.0859676	-0.329958	1.18527
GSM2235880	GSE84437	17	1	TMEcluster-A	-0.153866	0.852807	0.722627	1.61454	-0.224992	0.879867	-0.684221	-0.840135	-0.382695	-0.516642	0.492943	-1.09992	0.43262	-0.805137	-1.07241	-0.659835	0.0822795	-0.346702	0.477632	-0.153256	-0.0859676	-0.329958	0.247123
GSM2235881	GSE84437	125	0	TMEcluster-A	1.71539	-0.454589	1.54283	-0.7224	-0.224992	0.73268	-0.839738	-1.06814	-0.412487	-0.516642	0.161277	-0.605169	1.71915	-0.345603	-1.28976	-0.322988	-0.533336	0.121397	0.935786	-0.153256	-0.0859676	0.669853	-0.249181
GSM2235882	GSE84437	13	1	TMEcluster-A	0.419454	0.531596	0.599965	0.462523	-0.224992	-0.049296	-0.839738	1.19248	-0.558429	0.695327	-0.517977	0.525136	-0.582686	-0.977113	-0.119387	-0.618404	0.415262	-0.54843	0.898139	-0.153256	-0.0859676	-0.329958	0.298111
GSM2235883	GSE84437	19	1	TMEcluster-A	-0.85117	0.14359	0.429433	0.815249	-0.224992	-0.44579	-0.839738	-0.0979429	-0.506301	-0.516642	-0.517977	-0.505854	0.1974	-0.892575	-0.962289	-0.91388	0.00726711	-0.533661	4.35156	-0.153256	-0.0859676	-0.329958	0.872784
GSM2235884	GSE84437	126	0	TMEcluster-A	-0.123613	2.00848	0.155901	1.12979	-0.224992	-0.885908	-0.839738	1.12643	-0.325658	-0.516642	-0.517977	-0.116214	0.102549	-0.672548	0.0351464	-0.157184	-0.533336	0.0241941	0.775988	-0.153256	-0.0859676	-0.329958	0.949979
GSM2235885	GSE84437	124	0	TMEcluster-C	-0.612278	-0.454589	-0.691399	1.2252	-0.224992	-1.54407	1.22359	-0.0572401	-0.102015	0.664614	-0.452002	-0.025492	-0.637976	1.18029	0.979282	-0.428032	-0.197274	-0.704704	-0.338779	-0.153256	-0.0859676	-0.329958	1.04407
GSM2235886	GSE84437	51	1	TMEcluster-B	-0.187077	-0.454589	0.327931	-0.866397	-0.20124	-0.478212	-0.839738	-1.06814	-0.228259	-0.516642	0.130254	-1.10554	0.258753	3.56973	-1.58713	0.170248	-0.533336	2.25656	-0.909664	-0.153256	-0.0859676	-0.329958	1.08433
GSM2235887	GSE84437	79	1	TMEcluster-C	-0.808698	-0.128477	-0.691399	0.137221	-0.224992	-0.669807	-0.839738	-0.72926	-0.558429	-0.516642	-0.517977	0.0656365	1.81633	1.47123	3.5612	-1.10244	0.0237308	-0.704704	-0.133549	-0.153256	-0.0859676	-0.329958	0.517326
GSM2235888	GSE84437	68	1	TMEcluster-A	3.619	1.3236	0.549641	1.21939	0.598138	0.460414	-0.839738	-0.264282	0.284546	-0.516642	-0.517977	-1.08469	-0.637976	-0.974151	-1.3676	0.0442751	-0.533336	-0.342373	-0.858875	-0.153256	-0.0859676	-0.290034	-0.23941
GSM2235889	GSE84437	93	1	TMEcluster-C	2.29376	1.64899	-0.691399	-0.109776	0.594552	-1.54407	-0.135224	4.94545	1.37438	-0.516642	0.875427	-1.10554	-0.637976	0.492623	-0.476005	-1.30244	-0.533336	-0.110596	-1.28837	-0.153256	-0.0859676	0.346948	-1.15084
GSM2235899	GSE84437	34	1	TMEcluster-A	-0.616119	1.22299	-0.43776	0.314743	-0.224992	0.750985	-0.839738	-0.283466	-0.432547	-0.516642	-0.517977	-0.371134	0.0239329	-0.267668	-0.0509751	-1.61794	-0.393654	-0.0985847	1.71366	-0.153256	-0.0859676	0.286256	0.855135
GSM2235900	GSE84437	127	0	TMEcluster-A	-0.324412	0.715219	-0.691399	0.270987	-0.224992	-0.118457	-0.713862	-1.06814	0.240486	-0.516642	-0.517977	0.141858	1.92509	-0.364008	0.859729	0.605312	1.98754	-0.679314	0.450023	-0.153256	-0.0859676	-0.329958	-0.13074
GSM2235901	GSE84437	58	1	TMEcluster-B	1.92594	-0.454589	-0.324425	-1.22841	-0.224992	-0.165605	-0.838841	-1.06814	0.829075	-0.516642	0.556923	-0.760371	-0.637976	1.57032	0.58897	-0.651635	-0.533336	1.17833	-0.455293	5.2823	-0.0859676	-0.329958	0.447818
GSM2235902	GSE84437	34	1	TMEcluster-A	-0.339283	-0.454589	-0.691399	1.07151	-0.224992	1.02393	-0.839738	-1.06814	0.289428	0.771815	-0.517977	0.83341	0.116744	-1.02809	-0.622678	0.352109	-0.247813	-0.483374	0.914535	-0.153256	-0.0859676	-0.329958	1.0239
GSM2235903	GSE84437	131	0	TMEcluster-B	1.9153	-0.454589	-0.402321	-0.929842	2.34872	-1.48163	0.0231393	-0.675172	1.09139	-0.516642	-0.0659829	-0.0568686	-0.637976	2.41507	0.439171	0.258529	-0.533336	-0.704704	-1.63924	7.65911	-0.0859676	-0.329958	0.914886
GSM2235904	GSE84437	21	1	TMEcluster-A	1.83034	-0.454589	-0.691399	-0.985133	-0.224992	-0.507461	-0.839738	-0.564828	3.83806	-0.516642	-0.148774	-1.00057	-0.637976	0.836045	-0.241757	1.42389	-0.533336	-0.704704	0.536827	-0.153256	-0.0859676	-0.0693493	1.53758
GSM2235905	GSE84437	2	1	TMEcluster-A	0.148839	2.51079	-0.691399	0.0985584	-0.224992	0.710806	-0.828244	-0.433973	-0.558429	-0.516642	-0.517977	-0.393211	0.00499351	0.790997	-0.334375	-0.383758	-0.533336	-0.704704	-0.682387	-0.153256	-0.0859676	-0.329958	0.822708
GSM2235906	GSE84437	120	1	TMEcluster-A	0.134073	-0.454589	-0.111889	-0.708555	-0.224992	1.07175	-0.345833	-1.06814	-0.558429	-0.516642	-0.517977	0.305911	-0.637976	0.858719	0.0527698	0.46983	-0.487534	-0.50311	-0.189031	-0.153256	-0.0859676	-0.329958	0.409104
GSM2235907	GSE84437	123	0	TMEcluster-C	-0.234852	-0.454589	0.120234	1.07736	-0.224992	-1.54407	1.79366	-0.952445	-0.558429	-0.516642	0.978548	0.953383	0.159685	0.02308	1.57687	-0.303011	-0.533336	1.37552	-1.63924	2.58956	-0.0859676	0.380577	0.04124
GSM2235908	GSE84437	123	0	TMEcluster-A	2.89852	-0.454589	-0.691399	0.396433	-0.224992	0.387306	-0.839738	-0.993117	0.607161	-0.516642	-0.0337513	-0.735534	-0.637976	0.375583	-1.01141	1.0882	-0.533336	-0.704704	-0.205848	-0.153256	-0.0859676	-0.329958	0.761571
GSM2235909	GSE84437	18	1	TMEcluster-C	-0.948133	-0.454589	2.61471	-0.737557	-0.224992	-1.38199	0.451114	0.686075	-0.558429	0.499042	-0.517977	1.2862	1.48379	-0.179655	0.342841	0.246055	-0.133503	-0.599502	0.626722	-0.153256	-0.0859676	-0.329958	0.758633
GSM2235910	GSE84437	139	0	TMEcluster-C	-0.424774	-0.454589	-0.691399	-0.804199	-0.224992	-0.833175	1.39048	0.47972	0.116373	-0.516642	-0.0407698	1.38115	-0.637976	0.219595	2.09612	0.192703	0.415627	-0.549746	-0.350164	-0.153256	-0.0859676	-0.329958	0.953987
GSM2235921	GSE84437	139	0	TMEcluster-C	2.55796	0.643583	0.123096	0.512568	0.295029	-1.54407	-0.691636	1.60039	-0.411523	-0.516642	-0.21534	-0.22995	-0.637976	1.12978	-0.355361	-0.64529	-0.533336	-0.45313	-0.26514	-0.153256	-0.0859676	-0.329958	-0.523397
GSM2235922	GSE84437	138	0	TMEcluster-C	-0.548996	-0.454589	-0.691399	-0.463757	-0.224992	-1.50471	1.91592	0.741308	-0.305702	-0.516642	-0.517977	0.337915	-0.637976	1.08818	1.74195	-0.386624	-0.290779	-0.704704	0.225452	-0.153256	-0.0859676	-0.329958	-0.0121244
GSM2235923	GSE84437	14	1	TMEcluster-A	-0.971767	-0.0623359	-0.691399	-1.22841	-0.224992	0.514099	-0.839738	1.40828	1.87342	-0.516642	-0.517977	3.06528	0.835684	-0.0775418	-0.440853	-0.108777	-0.533336	0.291572	0.185008	-0.153256	-0.0859676	-0.329958	0.25465
GSM2235924	GSE84437	135	0	TMEcluster-C	-0.971767	0.646657	-0.691399	0.0623092	-0.224992	-1.11656	-0.704667	-0.476597	7.22929	-0.516642	1.42208	0.436377	-0.637976	0.176924	1.51791	-0.502946	-0.533336	0.0422153	-0.191698	-0.153256	-0.0859676	-0.329958	0.667326
GSM2235925	GSE84437	134	0	TMEcluster-A	3.63901	-0.445549	-0.181695	-0.43912	5.45819	-1.39795	-0.839738	2.982	2.76039	-0.516642	-0.517977	1.34179	1.67819	-0.455606	-1.23497	-0.740931	-0.533336	0.467005	-0.855501	-0.153256	-0.0859676	-0.329958	-0.183338
GSM2235926	GSE84437	140	0	TMEcluster-C	-0.570519	-0.454589	-0.691399	0.485551	-0.224992	-0.714516	1.23146	-0.440943	0.128563	-0.516642	-0.0129069	-0.365498	-0.637976	1.26761	0.753974	-0.309713	0.737497	-0.704704	-0.417948	-0.153256	-0.0859676	-0.329958	0.747489
GSM2235928	GSE84437	132	0	TMEcluster-A	-0.971767	0.386506	1.82931	-0.0340569	-0.224992	-1.28406	0.123984	-0.151678	-0.425112	-0.375317	-0.517977	0.227921	-0.637976	-1.02809	-0.802245	2.36302	-0.533336	1.86137	1.07535	-0.153256	-0.0859676	0.224383	0.683133
GSM2235929	GSE84437	60	1	TMEcluster-A	-0.620169	1.68883	-0.691399	1.19085	-0.224992	-0.358316	-0.828389	0.273225	-0.558429	-0.194374	-0.517977	-0.558782	0.563391	-1.02809	-0.732915	1.86928	-0.0598562	-0.450749	1.01763	-0.153256	-0.0859676	-0.329958	2.0069
GSM2235930	GSE84437	74	1	TMEcluster-B	0.0543278	-0.454589	-0.691399	-1.22841	1.65326	-0.949807	-0.839738	0.799292	2.22239	0.438143	-0.517977	0.575789	-0.637976	1.5881	-1.05245	0.945422	-0.533336	-0.704704	0.483998	-0.153256	-0.0859676	0.727872	0.585464
GSM2235931	GSE84437	132	0	TMEcluster-A	-0.912097	-0.221592	0.607492	-1.22841	-0.224992	2.26242	0.103866	1.45035	-0.558429	-0.516642	-0.517977	1.26051	-0.402651	-0.729979	-0.499971	-0.386331	-0.533336	0.454415	-0.811478	-0.153256	-0.0859676	-0.329958	-1.15202
GSM2235932	GSE84437	59	0	TMEcluster-C	-0.695206	-0.0518778	-0.691399	-0.102506	-0.224992	-0.35042	1.56101	-0.566696	-0.558429	-0.516642	0.268847	1.06092	-0.637976	-0.226859	1.91363	-1.08202	-0.348884	-0.704704	0.273906	-0.153256	-0.0859676	1.40528	-1.11672
GSM2235933	GSE84437	41	0	TMEcluster-A	0.951741	0.540407	0.368706	0.505751	-0.224992	-0.67103	-0.671008	0.960997	-0.558429	-0.12552	-0.517977	-0.611931	3.65132	-0.619632	-1.41	0.0203981	-0.533336	-0.242527	1.22203	-0.153256	-0.0859676	-0.329958	1.32363
GSM2235934	GSE84437	47	0	TMEcluster-C	-0.744063	-0.454589	-0.691399	0.938271	-0.224992	-0.790268	1.87271	0.764412	-0.558429	-0.516642	-0.517977	-0.0388668	-0.637976	0.973316	1.79306	-1.00981	-0.520797	-0.704704	-1.11934	-0.153256	-0.0859676	-0.329958	1.12942
GSM2235935	GSE84437	19	1	TMEcluster-A	0.287466	-0.454589	2.32485	-0.501027	-0.224992	0.571652	-0.839738	-0.17806	-0.558429	4.39911	-0.517977	-0.619758	-0.637976	-0.949409	-0.687535	-0.100319	-0.533336	-0.704704	0.556717	-0.153256	-0.0859676	-0.329958	-0.092432
GSM2235936	GSE84437	42	0	TMEcluster-A	0.542913	-0.454589	2.54059	-0.558314	-0.224992	0.534139	-0.778547	-0.866757	-0.0367064	-0.516642	-0.517977	-0.97322	1.57055	-0.879564	-0.860787	-0.702241	0.608139	-0.580425	2.03112	-0.153256	-0.0859676	0.960579	-0.991882
GSM2235937	GSE84437	37	0	TMEcluster-B	-0.971767	-0.454589	0.132813	-0.78052	-0.224992	1.60828	-0.839738	-1.06814	-0.558429	-0.516642	-0.517977	0.667299	2.06012	0.0482899	-1.0326	1.29786	-0.0291064	0.516686	-0.913552	-0.153256	-0.0859676	2.572	-1.40555
GSM2235938	GSE84437	92	0	TMEcluster-B	1.06404	-0.454589	0.225351	-0.698326	-0.224992	0.785153	-0.235099	-0.548385	-0.558429	-0.516642	-0.517977	0.289393	-0.435457	-0.572121	0.068549	-0.318248	-0.533336	1.08504	0.35919	-0.153256	-0.0859676	1.63309	-2.5701
GSM2235939	GSE84437	45	0	TMEcluster-A	0.253858	-0.454589	0.437132	-1.03196	-0.224992	1.35651	-0.751289	-1.06814	-0.558429	2.87625	-0.517977	-1.10554	-0.637976	-1.02809	-0.2165	0.220135	0.303466	-0.474634	1.62289	-0.153256	-0.0859676	-0.329958	0.600567
GSM2235940	GSE84437	33	1	TMEcluster-C	-0.971767	-0.444012	1.39539	3.27148	-0.224992	-1.54407	-0.0214093	-0.384138	-0.558429	2.4419	-0.517977	0.0101256	-0.311608	-1.02809	-0.288492	-0.137171	0.636912	-0.464649	0.515288	-0.153256	-0.0859676	-0.329958	0.555279
GSM2235941	GSE84437	41	0	TMEcluster-C	-0.561164	-0.454589	-0.691399	-0.199763	-0.224992	-0.497905	0.679927	0.757111	-0.558429	-0.516642	-0.517977	3.09862	-0.637976	-0.760626	1.05684	0.383931	0.692168	-0.53971	0.212079	-0.153256	-0.0859676	0.706723	-0.14478
GSM2235942	GSE84437	42	0	TMEcluster-A	-0.971767	-0.454589	2.06044	1.10378	-0.224992	0.797242	-0.839738	-1.06814	0.386674	-0.516642	-0.517977	1.26882	0.207929	-0.69617	-0.680657	-0.536575	0.0105434	-0.509428	0.438797	-0.153256	-0.0859676	-0.236834	-1.5726
GSM2235943	GSE84437	127	0	TMEcluster-C	-0.333131	-0.454589	0.280074	2.18035	-0.224992	-1.54407	2.24527	-0.340284	-0.558429	1.6756	-0.517977	1.07113	-0.637976	-0.126276	-0.455323	-0.288695	-0.533336	-0.704704	-0.883969	-0.153256	-0.0859676	-0.329958	0.408279
GSM2235944	GSE84437	126	0	TMEcluster-A	1.95506	3.68077	-0.691399	0.30093	3.17342	-0.403903	-0.839738	-0.488853	1.91176	-0.516642	-0.517977	-0.21283	1.13377	-0.570594	-1.41796	-0.117181	-0.533336	0.490535	-1.10462	-0.153256	-0.0859676	-0.329958	1.31431
GSM2235945	GSE84437	37	1	TMEcluster-B	0.542618	-0.454589	-0.691399	-0.859942	-0.224992	-1.03477	-0.569316	0.199727	3.18688	-0.516642	0.0843604	-0.717643	-0.637976	2.75846	2.12221	-1.04968	-0.533336	-0.704704	-0.963168	-0.153256	-0.0859676	-0.329958	0.968089
GSM2235946	GSE84437	131	0	TMEcluster-B	-0.448996	-0.398224	-0.691399	-1.22841	3.43435	-0.317732	-0.448156	-1.06814	1.30978	-0.516642	0.750514	0.261801	1.9346	0.616654	1.74905	-0.0780492	-0.533336	0.870216	-0.361536	-0.153256	-0.0859676	-0.329958	-1.12169
GSM2235947	GSE84437	129	0	TMEcluster-C	-0.674152	-0.242979	0.42814	0.963839	-0.224992	-1.54407	1.27939	1.28473	-0.558429	-0.170141	-0.517977	2.01522	-0.598737	-0.822726	0.873428	1.17358	-0.533336	0.88539	-1.35332	-0.153256	-0.0859676	0.824861	-0.934897
GSM2235948	GSE84437	132	0	TMEcluster-A	3.50313	1.03313	-0.691399	-0.258604	-0.224992	0.139577	-0.839738	-0.837836	0.239826	-0.516642	-0.517977	-0.53835	0.325689	-0.603181	-1.2229	0.794164	-0.533336	0.334586	0.517616	-0.153256	-0.0859676	-0.329958	2.24529
GSM2235949	GSE84437	132	0	TMEcluster-C	-0.213395	-0.111274	1.59385	-0.0638015	1.28555	-0.766164	0.748181	0.264162	0.196025	-0.516642	-0.517977	0.291166	-0.637976	-0.0296265	0.310926	-0.767202	0.321003	0.241525	0.039401	-0.153256	-0.0859676	-0.329958	-0.312986
GSM2235950	GSE84437	128	0	TMEcluster-A	1.10172	-0.454589	-0.691399	-0.0603155	-0.224992	0.247378	-0.839738	-1.06814	-0.505876	-0.398351	-0.517977	0.776333	1.4935	-1.02809	-1.12603	0.113361	-0.517279	-0.55064	3.24123	-0.153256	-0.0859676	-0.329958	1.50494
GSM2235951	GSE84437	5	1	TMEcluster-A	-0.605181	-0.454589	-0.691399	-0.485943	-0.224992	0.969896	-0.839738	0.681591	0.0800803	1.7471	-0.517977	-0.0873082	1.09556	-1.02809	0.494542	0.964233	0.257733	-0.104873	0.161248	-0.153256	-0.0859676	-0.329958	1.66581
GSM2235952	GSE84437	1	1	TMEcluster-C	-0.18652	-0.454589	-0.691399	0.922533	-0.224992	-1.54407	-0.537775	1.64064	-0.119759	-0.516642	-0.517977	4.71232	0.0895801	-0.323717	1.75371	-1.78792	-0.0768574	-0.350717	0.752796	-0.153256	-0.0859676	-0.329958	-0.555107
GSM2235953	GSE84437	10	1	TMEcluster-A	0.523409	-0.454589	-0.605238	-0.668662	-0.224992	-0.397863	-0.839738	0.36185	0.013664	-0.516642	-0.517977	0.101635	-0.637976	-0.665021	-0.93804	-0.656004	-0.533336	1.65457	3.9041	-0.153256	-0.0859676	0.366167	0.236928
GSM2235954	GSE84437	149	0	TMEcluster-C	0.0146016	-0.454589	1.08464	0.833045	-0.224992	-1.2567	2.06155	0.199537	-0.0391561	-0.516642	1.13783	-0.0540809	-0.204216	-0.901016	0.405136	-0.130314	1.18858	-0.699434	-0.0739895	-0.153256	-0.0859676	-0.329958	0.0136383
GSM2235955	GSE84437	149	0	TMEcluster-C	-0.408449	-0.454589	0.306502	-0.491884	-0.224992	-0.561	0.0341893	0.664747	-0.303618	0.845487	-0.517977	-0.268805	-0.637976	1.16484	0.43993	-0.275256	-0.529235	-0.704704	0.362314	-0.153256	-0.0859676	-0.329958	0.894439
GSM2235956	GSE84437	135	1	TMEcluster-B	-0.910266	0.083416	-0.691399	-1.13661	-0.224992	-0.282907	-0.839738	-1.06814	2.76436	-0.516642	1.38162	-1.10554	-0.637976	1.1653	0.400488	-0.0951367	-0.533336	3.64502	-1.56753	3.66002	-0.0859676	5.23446	0.0658943
GSM2235957	GSE84437	148	0	TMEcluster-C	-0.77861	-0.454589	-0.691399	-0.831032	-0.224992	-0.65968	1.58071	-0.0894008	-0.558429	-0.516642	0.867786	-0.381678	1.06909	1.24904	0.669384	-0.327348	-0.0428149	-0.362402	0.00602348	-0.153256	-0.0859676	-0.329958	0.302479
GSM2235958	GSE84437	152	0	TMEcluster-A	-0.328342	-0.454589	-0.534438	1.45638	-0.224992	0.272239	-0.839738	0.662844	-0.558429	-0.516642	-0.517977	-0.605058	0.559836	-1.02809	-0.781804	1.3276	0.367483	-0.608849	1.33718	-0.153256	-0.0859676	-0.329958	1.4484
GSM2235959	GSE84437	144	0	TMEcluster-C	-0.811903	-0.454589	1.08552	1.91484	-0.224992	-1.54407	1.47635	1.51263	-0.558429	-0.516642	-0.0256091	-1.10554	1.9165	-0.669017	0.838131	-0.0716945	-0.533336	-0.109253	-0.478432	-0.153256	-0.0859676	-0.329958	-1.72488
GSM2235960	GSE84437	142	0	TMEcluster-B	0.530432	-0.454589	-0.691399	-0.693183	-0.224992	1.27143	0.736231	-0.170582	-0.558429	-0.516642	0.0603671	-0.167248	0.278249	0.878266	0.156608	-0.615417	-0.533336	-0.704704	-1.55683	1.43456	-0.0859676	0.516601	-0.782254
GSM2235961	GSE84437	141	0	TMEcluster-A	-0.226907	-0.454589	-0.691399	-1.18699	-0.224992	0.973211	-0.839738	-1.06814	-0.558429	-0.516642	0.201049	0.609252	-0.0366416	-0.0385251	-0.768749	1.82728	1.39481	-0.704704	1.24708	-0.153256	-0.0859676	-0.067752	1.74241
GSM2235962	GSE84437	27	1	TMEcluster-C	-0.71223	0.0202778	-0.691399	-0.308378	-0.224992	-1.22312	1.2554	-0.395654	-0.558429	-0.516642	1.18598	-0.219083	-0.637976	-1.02809	3.77797	1.40119	-0.059292	0.370304	-0.219537	-0.153256	-0.0859676	1.14719	1.13049
GSM2235963	GSE84437	27	1	TMEcluster-C	0.69263	-0.454589	-0.691399	-0.255858	-0.224992	0.260362	-0.839738	1.29128	-0.558429	-0.516642	0.677413	-0.4913	-0.637976	0.30803	0.992139	0.0529361	-0.533336	-0.0788318	0.0182791	-0.153256	-0.0859676	-0.287439	-1.21769
GSM2235964	GSE84437	22	1	TMEcluster-C	0.256877	-0.454589	0.160427	0.583606	-0.224992	-0.617187	-0.187388	1.10286	-0.440688	1.38938	-0.517977	-0.448132	-0.637976	-0.365567	1.89534	-0.461491	2.44561	-0.704704	-0.402029	-0.153256	-0.0859676	-0.329958	-0.219685
GSM2235965	GSE84437	63	1	TMEcluster-C	-0.971767	-0.210315	0.121977	4.12831	-0.224992	-1.54407	0.55924	1.01236	3.83911	-0.516642	-0.517977	0.199979	1.55499	-0.728611	-1.36295	-0.726768	-0.533336	-0.335624	-0.7346	-0.153256	-0.0859676	-0.329958	-0.939634
GSM2235966	GSE84437	33	0	TMEcluster-A	-0.971767	0.505926	4.38126	0.402097	-0.224992	0.550558	-0.608735	-0.725286	-0.558429	0.394631	-0.517977	-0.342328	-0.637976	-1.00569	-0.887951	-0.248171	-0.25482	-0.492318	0.462016	-0.153256	-0.0859676	-0.329958	-0.733198
GSM2235967	GSE84437	10	1	TMEcluster-C	0.598142	-0.454589	-0.691399	0.525231	-0.224992	-1.4223	0.344779	1.58959	-0.276754	-0.516642	-0.517977	-1.09544	-0.637976	2.0028	-1.30095	2.22253	-0.533336	-0.704704	-0.984997	-0.153256	-0.0859676	-0.329958	-1.58359
GSM2235968	GSE84437	59	0	TMEcluster-A	-0.410534	-0.454589	-0.691399	-0.549034	-0.224992	0.907073	-0.839738	-0.943564	2.26302	-0.516642	-0.517977	0.991775	-0.637976	-1.02809	-0.688831	2.68525	10.2955	-0.704704	-1.12945	-0.153256	-0.0859676	0.17933	-2.0446
GSM2235969	GSE84437	64	0	TMEcluster-C	-0.640894	-0.454589	-0.691399	0.797876	-0.224992	-0.729459	2.56169	1.69175	1.74513	-0.516642	0.868939	0.549803	-0.637976	-0.741337	0.136694	-1.78128	-0.330457	-0.28028	-0.300977	-0.153256	-0.0859676	1.184	-0.482401
GSM2235970	GSE84437	18	1	TMEcluster-A	0.883148	0.16573	-0.691399	0.0928668	-0.224992	0.551616	-0.686177	0.399293	-0.558429	-0.233702	-0.517977	-0.0335749	-0.637976	-0.326367	-0.196599	0.897668	1.10146	-0.047344	-0.2146	-0.153256	-0.0859676	-0.329958	1.21176
GSM2235971	GSE84437	63	0	TMEcluster-A	1.16424	-0.454589	0.577042	-0.224158	-0.224992	1.23731	-0.839738	3.42288	1.47271	-0.516642	-0.517977	-0.755343	0.932833	-0.730415	-0.372881	-0.467383	-0.533336	-0.0544656	-1.44238	-0.153256	3.14934	-0.329958	0.539633
GSM2235972	GSE84437	57	0	TMEcluster-C	-0.560478	-0.454589	-0.691399	2.6824	-0.224992	-1.54407	1.49343	0.61975	2.01561	-0.516642	0.579662	0.557837	0.0949522	-0.82346	-0.491585	0.142718	-0.533336	-0.581351	-0.0748894	-0.153256	-0.0859676	-0.329958	-2.26599
GSM2235973	GSE84437	62	0	TMEcluster-B	-0.971767	-0.235513	-0.691399	-0.444775	-0.224992	0.396875	-0.839738	1.57587	2.59882	-0.516642	-0.517977	1.92661	-0.637976	-0.71666	-1.6303	1.85104	-0.533336	2.8267	-0.993288	-0.153256	-0.0859676	1.3922	-1.03796
GSM2235974	GSE84437	12	1	TMEcluster-C	0.23557	-0.454589	-0.395453	2.0539	-0.224992	-1.54407	0.92064	2.13253	1.74083	-0.516642	0.664378	-1.10554	2.2949	0.895584	-1.22203	-1.42649	-0.533336	-0.112045	-1.00264	-0.153256	-0.0859676	-0.329958	-1.84641
GSM2235975	GSE84437	61	0	TMEcluster-C	-0.971767	-0.414439	-0.562732	1.25756	-0.224992	-1.54407	3.15583	2.14876	2.17103	1.14444	0.152739	-1.10554	-0.637976	-0.322829	-0.285961	-0.681055	-0.323866	-0.704704	-0.599063	-0.153256	-0.0859676	-0.329958	-2.44171
GSM2235976	GSE84437	55	0	TMEcluster-C	-0.971767	-0.454589	0.462278	2.39283	-0.224992	-1.54407	1.64641	2.11191	-0.152231	0.610181	-0.517977	3.00107	-0.637976	-0.817324	-0.955613	-1.41064	0.0635122	-0.704704	-0.201669	-0.153256	-0.0859676	-0.329958	-1.19172
GSM2235977	GSE84437	7	1	TMEcluster-A	-0.971767	-0.161291	-0.691399	-1.22841	-0.224992	0.473651	-0.839738	0.875342	1.7582	-0.516642	-0.517977	0.733098	0.609244	-1.02809	0.0773492	4.54047	-0.533336	-0.121967	-0.453541	-0.153256	-0.0859676	-0.329958	1.03652
GSM2235978	GSE84437	34	0	TMEcluster-C	-0.254686	-0.454589	1.01057	1.08792	-0.224992	-0.978295	0.423877	-0.306097	-0.536583	4.89103	-0.517977	0.736489	-0.637976	-0.596711	-0.334867	-0.392272	0.295189	-0.704704	-0.279822	-0.153256	-0.0859676	-0.329958	-0.37932
GSM2235979	GSE84437	42	0	TMEcluster-A	-0.037271	-0.454589	1.86518	-1.09612	-0.224992	1.21153	-0.839738	-0.819836	1.52824	-0.516642	-0.517977	-0.0471863	-0.35705	0.222217	-0.856317	0.0338457	0.833647	-0.648082	0.245225	-0.153256	-0.0859676	-0.329958	0.300689
GSM2235980	GSE84437	6	1	TMEcluster-B	-0.971767	-0.256311	-0.589959	-0.560592	-0.224992	-1.0002	-0.839738	0.0479312	-0.558429	4.80981	4.56744	2.73633	-0.637976	-1.02809	0.029316	0.0317173	-0.533336	0.142528	-0.280316	-0.153256	-0.0859676	4.18792	-0.27973
GSM2235981	GSE84437	36	0	TMEcluster-C	0.19808	-0.454589	-0.0442153	-0.353004	-0.224992	-0.669574	0.568481	0.0376404	-0.171767	-0.391679	-0.517977	0.87867	0.592874	0.148216	0.378066	1.25535	-0.157623	-0.24354	-0.30195	-0.153256	-0.0859676	-0.329958	-0.397719
GSM2235982	GSE84437	37	0	TMEcluster-B	-0.562133	-0.454589	-0.691399	-1.22841	-0.224992	0.0497039	-0.302617	0.838553	0.0390188	-0.516642	4.32124	-0.529387	1.46896	-0.566771	0.599388	0.488399	3.52463	0.500936	-0.0740941	-0.153256	-0.0859676	-0.329958	0.472743
GSM2235983	GSE84437	38	0	TMEcluster-C	-0.466102	-0.454589	1.22979	0.962617	-0.224992	-0.45816	1.0636	0.48708	-0.558429	0.437174	0.921275	-1.10554	0.039437	-0.155513	1.34787	-0.76264	0.262298	-0.420305	-1.22519	-0.153256	-0.0859676	-0.329958	0.446353
GSM2235984	GSE84437	8	1	TMEcluster-A	0.120536	-0.454589	0.926511	-0.815393	-0.224992	0.338046	-0.355602	-1.06814	-0.558429	0.441976	-0.517977	0.915245	0.00475284	-0.634463	-0.449894	-0.526216	0.44505	0.0979324	2.07428	-0.153256	-0.0859676	-0.329958	-0.705281
GSM2235985	GSE84437	35	0	TMEcluster-B	1.38878	-0.454589	0.675586	-1.22841	-0.224992	-0.216784	-0.839738	0.861819	-0.167804	-0.516642	-0.0474047	-0.242616	0.403133	1.43865	-0.671949	0.499495	-0.533336	-0.588084	-0.849491	-0.153256	-0.0859676	2.43563	0.306435
GSM2235986	GSE84437	35	0	TMEcluster-A	0.402332	-0.454589	0.983975	-0.193355	-0.224992	1.77857	-0.661249	-1.06814	-0.558429	-0.516642	-0.517977	-0.454388	-0.637976	-0.974921	-0.326301	-0.387925	1.15962	-0.704704	1.23258	-0.153256	-0.0859676	-0.329958	-0.58338
GSM2235987	GSE84437	35	0	TMEcluster-C	-0.683116	-0.454589	-0.691399	1.50799	-0.224992	-1.54407	0.925636	-0.377396	-0.201798	-0.516642	-0.517977	1.33888	1.69527	-0.300588	0.180548	-0.810614	0.982281	0.482725	1.12651	-0.153256	-0.0859676	-0.329958	1.10489
GSM2235988	GSE84437	70	0	TMEcluster-A	0.257509	-0.454589	3.55501	0.332191	-0.224992	1.69754	-0.839738	-1.06814	-0.558429	-0.516642	-0.194836	-0.28646	-0.134098	-0.908175	-0.782233	-0.88833	0.441475	-0.213535	-0.223222	-0.153256	-0.0859676	-0.329958	-0.805546
GSM2235991	GSE84437	32	1	TMEcluster-A	-0.368	-0.454589	-0.078832	-0.43087	-0.224992	-0.0470457	-0.0997095	-0.289387	0.178458	-0.516642	-0.517977	-0.571587	-0.637976	1.07322	0.817224	0.0706693	-0.533336	-0.704704	0.580193	-0.153256	-0.0859676	-0.329958	0.886315
GSM2235992	GSE84437	128	0	TMEcluster-A	-0.612083	-0.175562	5.8155	-0.984193	-0.224992	0.442595	-0.839738	-0.201148	0.871838	-0.516642	1.17691	0.489626	1.71504	-1.02809	-1.27175	-0.129268	-0.533336	-0.143066	-0.235608	-0.153256	-0.0859676	-0.329958	0.697463
GSM2235993	GSE84437	126	0	TMEcluster-C	-0.421187	-0.454589	1.31937	1.5433	-0.224992	-0.828695	-0.734376	0.734771	-0.558429	0.577482	-0.517977	2.17902	-0.637976	-0.327807	1.20861	-1.01697	0.465212	-0.704704	-0.321659	-0.153256	-0.0859676	-0.329958	0.0998934
GSM2235994	GSE84437	123	0	TMEcluster-A	-0.971767	-0.454589	3.88683	-0.478008	-0.224992	-1.04686	-0.839738	-1.06814	2.17615	-0.426342	-0.517977	3.14394	-0.637976	-1.02809	-1.6303	2.22839	-0.533336	-0.159271	1.1418	-0.153256	-0.0859676	0.266076	1.19756
GSM2235995	GSE84437	10	1	TMEcluster-A	-0.846783	-0.0542112	-0.432056	-0.878782	-0.224992	0.414152	1.63657	-1.06814	-0.558429	-0.516642	-0.310044	0.898882	2.36738	-0.669339	-1.07401	-0.89809	-0.533336	2.13658	1.1261	-0.153256	-0.0859676	-0.329958	-0.539258
GSM2235996	GSE84437	6	1	TMEcluster-B	-0.747299	-0.105706	0.307365	-0.929111	6.12946	-1.54407	1.79987	-1.06814	-0.209312	-0.516642	3.11248	-0.823847	-0.637976	1.33604	-0.163316	-1.78792	-0.533336	1.358	-0.433452	-0.153256	-0.0859676	2.4085	-0.38039
GSM2235997	GSE84437	128	0	TMEcluster-B	-0.518765	-0.289674	-0.691399	-0.714369	1.15694	-1.31111	1.96864	-0.301853	0.0646306	-0.516642	2.66423	-0.48308	-0.637976	2.19538	-0.804787	-1.78792	-0.533336	-0.346062	-0.14219	-0.153256	-0.0859676	2.86663	0.569651
GSM2235998	GSE84437	122	0	TMEcluster-C	-0.810301	-0.454589	-0.691399	-1.04848	-0.224992	-0.452321	2.21821	1.03322	-0.558429	-0.516642	0.281048	1.33053	1.16573	-0.83865	-0.278859	-0.355826	1.86759	-0.110008	1.07675	-0.153256	-0.0859676	-0.329958	0.0532262
GSM2235999	GSE84437	95	1	TMEcluster-B	-0.0494213	-0.0413767	-0.691399	-1.22841	-0.224992	0.290771	0.567784	2.05213	-0.558429	-0.516642	3.75183	-1.10554	0.795376	-0.529592	1.06768	0.518276	-0.452611	0.0864911	-0.905022	-0.153256	-0.0859676	-0.329958	0.141137
GSM2236000	GSE84437	122	0	TMEcluster-B	-0.0384827	-0.454589	1.83881	-0.456379	-0.224992	-1.54407	-0.839738	1.54809	2.90588	-0.310423	-0.517977	-0.60135	-0.470951	3.25654	-0.194725	-0.813798	-0.533336	-0.704704	-1.45541	-0.153256	-0.0859676	-0.329958	0.221815
GSM2236001	GSE84437	124	0	TMEcluster-A	-0.514357	-0.454589	-0.691399	-0.0828091	-0.224992	1.35742	-0.839738	-1.06814	-0.497809	-0.516642	-0.517977	1.94928	1.70686	-1.02809	-0.712374	1.31012	-0.161953	0.476823	0.417519	-0.153256	-0.0859676	-0.329958	0.272644
GSM2236002	GSE84437	129	0	TMEcluster-A	0.770877	-0.454589	-0.691399	-0.437569	-0.0735139	-0.44227	-0.346961	-0.496474	-0.558429	-0.516642	-0.517977	0.37211	-0.30023	1.08885	0.0403499	1.75056	-0.533336	0.0055931	-0.235662	-0.153256	-0.0859676	-0.329958	-1.08049
GSM2236003	GSE84437	126	0	TMEcluster-A	-0.971767	0.714749	-0.691399	-0.936062	-0.224992	1.39338	-0.839738	0.382833	0.659553	1.246	-0.517977	0.209884	-0.637976	-1.02809	-1.18302	3.05624	-0.476326	-0.310273	-0.313329	-0.153256	-0.0859676	0.149809	0.889957
GSM2236004	GSE84437	46	1	TMEcluster-A	-0.918866	-0.454589	-0.691399	-0.74386	-0.224992	1.13387	0.0319546	-0.543552	-0.558429	-0.516642	-0.0744972	-0.217901	-0.637976	-0.529453	0.347826	1.39853	0.976951	1.20868	0.168811	-0.153256	-0.0859676	-0.329958	-0.845444
GSM2236005	GSE84437	9	1	TMEcluster-B	-0.137885	-0.454589	-0.691399	-0.667643	-0.224992	-1.54407	1.83642	0.524378	-0.0788258	-0.516642	2.27128	-1.10554	1.22991	2.50902	0.330184	-1.49643	-0.533336	-0.430121	-0.579682	-0.153256	-0.0859676	-0.329958	0.487167
GSM2236006	GSE84437	24	1	TMEcluster-C	-0.971767	0.0110411	-0.691399	2.6954	-0.224992	-1.21885	-0.226502	1.50888	1.52709	-0.516642	-0.517977	-0.713569	-0.637976	1.22907	0.490208	-0.458999	-0.533336	-0.551338	-1.20722	-0.153256	-0.0859676	-0.329958	0.0133881
GSM2236007	GSE84437	21	1	TMEcluster-C	-0.348623	-0.454589	-0.691399	-0.760618	-0.224992	-0.720881	0.38441	-0.126992	-0.191704	-0.516642	-0.196863	0.905028	-0.637976	-0.644408	1.17494	1.40087	-0.190496	2.08374	0.554184	-0.153256	-0.0859676	0.679563	0.997298
GSM2236008	GSE84437	30	1	TMEcluster-A	-0.152347	-0.454589	-0.691399	1.81762	-0.224992	0.376556	-0.839738	-1.06814	0.152369	0.378107	-0.517977	1.10372	-0.637976	-0.990475	0.846868	1.00156	0.508255	-0.704704	-0.245851	-0.153256	-0.0859676	-0.329958	1.27472
GSM2236009	GSE84437	27	1	TMEcluster-A	0.175098	-0.454589	-0.691399	-0.889543	-0.224992	0.673727	-0.350615	1.40621	-0.558429	1.38774	-0.517977	-1.05413	-0.581386	-0.432893	0.777503	2.17064	-0.533336	-0.618569	-0.472745	-0.153256	-0.0859676	-0.329958	0.228821
GSM2236010	GSE84437	38	1	TMEcluster-A	-0.0435669	0.699258	0.511698	-0.686217	-0.224992	0.716486	-0.839738	-0.402192	0.16442	-0.383265	-0.517977	-0.325338	-0.637976	-0.951186	-1.29789	-0.511834	-0.533336	-0.479709	3.41984	-0.153256	-0.0859676	-0.329958	-1.29822
GSM2236011	GSE84437	26	1	TMEcluster-C	-0.626282	-0.0545824	-0.691399	1.76964	-0.224992	-1.54407	0.313943	1.79736	-0.516351	-0.516642	-0.517977	1.49727	1.03821	-0.143809	-0.111266	-1.44952	-0.121618	-0.704704	1.4102	-0.153256	-0.0859676	-0.329958	0.465636
GSM2236012	GSE84437	3	1	TMEcluster-A	1.1816	-0.454589	-0.691399	-1.22841	-0.224992	1.13341	-0.71456	0.823529	-0.558429	2.69144	-0.517977	-0.422121	-0.20162	-0.860854	1.00304	-0.137592	-0.533336	0.690776	-0.210508	-0.153256	-0.0859676	-0.329958	-0.674188
GSM2236013	GSE84437	53	1	TMEcluster-B	-0.699054	-0.317748	-0.691399	-1.22841	-0.224992	0.873769	-0.839738	-0.716819	-0.558429	1.32726	-0.271213	-1.10554	-0.637976	1.4993	1.78597	0.245613	2.67258	-0.704704	-0.973897	-0.153256	-0.0859676	-0.329958	-0.425108
GSM2236014	GSE84437	105	1	TMEcluster-C	-0.814349	-0.454589	-0.691399	1.44903	-0.224992	-1.54407	1.89723	1.86468	-0.558429	-0.516642	1.61889	0.705151	-0.637976	-0.178368	0.151968	-1.37237	-0.325028	-0.704704	0.204772	-0.153256	-0.0859676	1.75659	-2.20416
GSM2236015	GSE84437	110	0	TMEcluster-A	1.53892	2.64669	-0.0925824	-1.04089	-0.224992	0.532876	-0.839738	0.900357	-0.558429	3.98197	-0.517977	-0.89455	-0.637976	-0.597116	-0.673558	-0.519286	-0.533336	-0.190572	-0.787293	-0.153256	-0.0859676	-0.329958	0.245518
GSM2236016	GSE84437	20	1	TMEcluster-C	1.65117	-0.454589	-0.691399	-1.19892	-0.224992	-0.0836384	-0.540995	1.80451	-0.558429	0.984074	-0.517977	0.808699	0.980351	-0.449577	1.07261	-0.459724	-0.533336	-0.507921	0.534681	-0.153256	-0.0859676	-0.329958	-1.54178
GSM2236017	GSE84437	17	1	TMEcluster-A	-0.971767	0.158261	0.343478	1.22517	-0.224992	1.30071	-0.839738	0.0206959	-0.558429	-0.516642	-0.517977	1.42959	-0.613573	-0.916565	-0.347829	-0.314707	-0.347426	-0.617955	0.169898	-0.153256	-0.0859676	-0.329958	-0.151847
GSM2236018	GSE84437	116	0	TMEcluster-A	1.25358	-0.454589	0.117899	0.176562	-0.224992	2.40744	-0.839738	-0.355744	-0.558429	-0.516642	-0.517977	1.63657	-0.637976	-0.859084	-0.845796	-0.480729	-0.533336	-0.19525	-0.841331	-0.153256	-0.0859676	-0.329958	-1.0437
GSM2236019	GSE84437	92	1	TMEcluster-B	1.8934	-0.454589	0.437023	-0.724257	-0.224992	1.83667	-0.493519	-1.06814	-0.558429	-0.516642	-0.517977	0.265112	-0.637976	0.635026	0.126095	-0.721606	-0.533336	-0.354912	-1.40411	-0.153256	-0.0859676	-0.268807	-0.503442
GSM2236020	GSE84437	109	0	TMEcluster-C	0.349994	-0.454589	2.32213	-0.858532	-0.224992	0.00864612	-0.217936	0.0304433	-0.558429	0.822609	0.818093	-1.10554	-0.637976	-0.610054	3.74135	-0.806515	-0.533336	-0.398419	-0.588245	-0.153256	-0.0859676	-0.329958	-0.923285
GSM2236021	GSE84437	51	1	TMEcluster-A	-0.971767	1.36391	-0.689009	0.706704	-0.224992	0.222496	-0.520615	0.955105	-0.558429	1.58656	-0.517977	-1.10554	-0.637976	-1.02809	0.130812	2.19012	-0.533336	-0.704704	-0.313311	-0.153256	-0.0859676	-0.226	1.08174
GSM2236022	GSE84437	104	0	TMEcluster-B	0.218524	-0.454589	-0.139733	-0.306675	-0.224992	0.71267	-0.658133	1.88064	-0.558429	-0.427424	-0.517977	-0.378374	-0.45906	-0.603785	-1.27053	-0.0704685	-0.533336	5.69026	-0.591465	-0.153256	-0.0859676	-0.329958	-1.46981
GSM2236023	GSE84437	108	0	TMEcluster-B	0.0335284	0.412887	-0.691399	-1.12655	0.461797	0.487737	0.646987	-0.857924	-0.558429	-0.516642	0.183673	-0.236367	-0.637976	0.648784	1.58781	0.0288301	-0.268295	-0.587341	-0.582631	-0.153256	-0.0859676	-0.329958	-1.39745
GSM2236024	GSE84437	103	0	TMEcluster-A	3.62237	4.21847	-0.691399	-0.398617	5.91178	-0.0754188	-0.592266	-0.630805	-0.558429	0.942656	-0.517977	-0.90637	-0.637976	-0.45602	-0.874407	-1.43817	-0.533336	-0.17748	-1.20068	-0.153256	-0.0859676	-0.329958	-0.646066
GSM2236025	GSE84437	39	1	TMEcluster-A	2.42518	4.37086	-0.691399	-0.55153	1.77909	0.769957	-0.839738	-0.190346	-0.405758	-0.28926	-0.517977	-1.10554	-0.637976	-0.357964	-1.14776	-0.223391	-0.533336	0.439045	-1.34168	-0.153256	-0.0859676	-0.319633	0.76443
GSM2236026	GSE84437	64	1	TMEcluster-A	-0.748086	-0.454589	-0.541046	-0.851484	-0.224992	0.700444	-0.839738	-0.681674	-0.193483	2.34947	-0.517977	0.109774	-0.637976	-0.36398	-0.984689	-0.122602	-0.533336	-0.333014	2.89673	-0.153256	-0.0859676	-0.329958	1.97165
GSM2236027	GSE84437	124	0	TMEcluster-C	-0.379387	-0.454589	0.54234	1.24763	-0.224992	-1.54407	-0.398361	-0.345981	-0.558429	-0.516642	-0.517977	0.842406	-0.637976	0.452885	-0.144134	0.0625692	-0.533336	-0.704704	1.12638	-0.153256	-0.0859676	3.25148	0.77886
GSM2236028	GSE84437	95	1	TMEcluster-C	-0.664818	-0.454589	-0.691399	-1.22841	-0.224992	0.583554	0.403047	-0.476954	-0.558429	0.495449	-0.517977	0.432344	-0.637976	-0.082074	2.42955	0.0468382	-0.178864	-0.16061	0.170966	-0.153256	-0.0859676	-0.329958	-0.698925
GSM2236029	GSE84437	138	0	TMEcluster-C	2.17603	2.48188	-0.166474	1.65124	-0.224992	-1.28511	-0.00515812	0.7478	2.27074	-0.356377	-0.517977	-0.214557	-0.637976	-0.334068	0.466135	-1.12316	-0.533336	-0.704704	-1.49173	-0.153256	-0.0859676	-0.329958	-1.57776
GSM2236030	GSE84437	138	0	TMEcluster-B	-0.279042	-0.454589	-0.691399	-0.901811	-0.224992	-0.399852	-0.839738	-0.811029	0.161357	-0.516642	-0.517977	0.0775815	-0.637976	1.83251	-0.137081	2.66515	-0.533336	0.0291739	-0.407778	-0.153256	-0.0859676	0.694104	0.16422
GSM2236031	GSE84437	134	0	TMEcluster-A	0.804517	2.25435	-0.691399	-0.0828957	-0.224992	0.036693	-0.839738	0.187977	-0.558429	-0.516642	-0.517977	-0.386236	0.779535	-0.694035	-0.81849	1.64379	-0.533336	0.933175	-0.183012	-0.153256	-0.0859676	-0.329958	1.00089
GSM2236032	GSE84437	134	0	TMEcluster-C	0.740636	-0.454589	0.17741	1.46214	-0.224992	-1.38962	0.276014	0.232065	-0.163448	-0.516642	-0.517977	2.81445	0.896875	-1.02809	1.3065	-0.712784	-0.533336	1.35516	-0.523649	-0.153256	-0.0859676	-0.329958	-0.401167
GSM2236033	GSE84437	120	0	TMEcluster-B	1.16628	-0.454589	-0.0900066	0.16826	-0.224992	-0.726046	-0.553837	0.110217	2.24321	-0.516642	-0.517977	-0.75858	-0.637976	2.13009	-0.71807	0.36381	-0.533336	-0.704704	-0.917275	-0.153256	-0.0859676	-0.329958	-0.0740576
GSM2236034	GSE84437	122	0	TMEcluster-C	-0.0335954	1.19631	-0.691399	0.536096	-0.224992	-1.03028	0.365709	1.81183	0.277075	-0.414035	-0.517977	-0.660108	-0.637976	0.281502	1.3149	-0.937257	0.382913	-0.500864	-0.159548	-0.153256	-0.0859676	-0.329958	0.0094558
GSM2236036	GSE84437	41	0	TMEcluster-A	0.0602891	-0.454589	1.04244	-0.647493	-0.224992	1.53527	-0.566557	-1.06814	-0.558429	-0.516642	-0.517977	0.246745	0.0556299	-1.02289	-1.19673	-0.639466	-0.2882	0.92633	1.9612	-0.153256	-0.0859676	-0.329958	-1.37348
GSM2236037	GSE84437	41	0	TMEcluster-A	-0.128775	-0.454589	-0.691399	-1.01149	-0.224992	0.213788	-0.546889	-0.951835	0.553529	0.568166	-0.517977	-1.10554	-0.637976	2.03361	-0.921781	1.38874	1.00104	-0.704704	-0.0307815	-0.153256	-0.0859676	-0.329958	0.707894
GSM2236038	GSE84437	40	0	TMEcluster-A	-0.971767	0.117751	2.19476	1.06636	0.490147	-0.385152	-0.266873	-0.611874	-0.558429	1.40639	-0.517977	-0.500253	-0.637976	-0.858642	-0.593612	0.493134	-0.174127	-0.618152	0.9044	-0.153256	-0.0859676	-0.32501	0.309308
GSM2236039	GSE84437	42	0	TMEcluster-B	-0.137976	-0.454589	1.0732	-1.22841	-0.224992	1.31899	-0.484551	0.120869	-0.558429	-0.229563	2.35147	-1.07949	-0.637976	0.0701328	-0.979271	0.0250114	0.997673	1.71071	-0.613998	-0.153256	-0.0859676	-0.329958	-0.0772593
GSM2236040	GSE84437	37	0	TMEcluster-B	-0.0914377	-0.454589	0.205607	-0.409327	-0.224992	1.47118	0.364611	-1.06814	-0.558429	-0.516642	-0.517977	0.727274	-0.505534	-1.02809	-1.1747	-1.17751	-0.533336	-0.110374	1.00179	-0.153256	-0.0859676	5.30512	-1.6241
GSM2236041	GSE84437	41	0	TMEcluster-A	-0.247164	-0.334027	-0.691399	-0.316146	-0.224992	0.0092396	-0.839738	-0.0374589	0.250873	1.15151	-0.517977	-0.341035	-0.312684	-0.847903	-0.40449	-0.0680457	0.765935	-0.219111	3.16152	-0.153256	-0.0859676	-0.329958	0.615618
GSM2236042	GSE84437	37	0	TMEcluster-A	2.15448	-0.454589	0.959436	0.63438	-0.224992	-0.638126	-0.608514	-0.698482	-0.558429	-0.516642	-0.517977	1.42039	1.01007	0.486542	-0.472405	-1.05187	-0.533336	-0.270809	0.0284889	-0.153256	-0.0859676	-0.329958	-0.754153
GSM2236043	GSE84437	40	0	TMEcluster-A	0.868364	-0.454589	0.938603	-0.289889	-0.224992	1.36805	-0.683983	-0.481091	-0.558429	-0.516642	-0.517977	-0.877696	-0.302056	0.169567	-0.312693	-0.538731	0.574247	-0.185171	-0.0685161	-0.153256	-0.0859676	-0.225728	0.236643
GSM2236044	GSE84437	141	0	TMEcluster-C	0.648502	-0.454589	-0.691399	-0.302713	-0.14974	-0.0144714	0.324913	-0.0869631	0.664437	-0.516642	-0.33257	0.481014	-0.637976	0.545294	0.419409	-0.169746	-0.273421	-0.422698	-0.0681746	-0.153256	-0.0859676	-0.329958	-0.525745
GSM2236045	GSE84437	161	0	TMEcluster-C	0.460631	-0.454589	0.210839	1.6599	-0.224992	-1.17819	0.458138	-0.250567	2.64559	-0.516642	-0.517977	0.191339	-0.637976	-0.376453	0.260914	-1.51343	0.260378	0.240785	0.727843	-0.153256	-0.0859676	-0.329958	-0.543398
GSM2236046	GSE84437	35	1	TMEcluster-C	-0.825224	-0.324615	0.109006	0.369665	-0.224992	-0.0955653	-0.839738	2.47368	-0.497511	-0.516642	-0.517977	0.385019	-0.637976	-1.02809	0.0486331	1.73876	-0.533336	0.106657	0.694885	-0.153256	-0.0859676	-0.329958	-0.848064
GSM2236047	GSE84437	49	1	TMEcluster-A	0.405746	6.11514	-0.415347	-0.76097	-0.224992	-1.27956	-0.839738	1.29043	0.342649	2.04244	-0.517977	-0.373969	-0.637976	0.834103	-1.35916	-0.636045	-0.533336	-0.572739	-0.991055	-0.153256	1.92676	-0.329958	-0.703807
GSM2236048	GSE84437	102	0	TMEcluster-C	-0.489228	-0.454589	-0.691399	-0.439605	-0.224992	-0.0611771	0.258894	0.6425	-0.558429	-0.37648	-0.517977	0.310363	-0.637976	-0.63202	-0.00630312	0.912006	-0.533336	0.637185	1.6095	-0.153256	-0.0859676	-0.329958	-3.73622
GSM2236049	GSE84437	33	1	TMEcluster-A	4.98578	4.08174	-0.114675	-0.297561	-0.224992	0.345778	-0.546996	0.541718	-0.558429	-0.250552	-0.517977	-1.10554	-0.637976	-0.622733	-1.4839	-0.858465	-0.533336	-0.256075	-1.48389	-0.153256	-0.0859676	-0.329958	-0.857926
GSM2236050	GSE84437	101	0	TMEcluster-B	1.08161	-0.454589	-0.691399	-1.0922	-0.224992	1.72673	-0.158755	2.21628	-0.558429	-0.267911	-0.511474	-1.10554	-0.351948	0.117437	-0.810695	1.26546	-0.533336	-0.704704	-1.21583	-0.153256	-0.0859676	-0.329958	-2.02924
GSM2236051	GSE84437	38	1	TMEcluster-C	2.04218	1.07502	-0.691399	2.98085	-0.224992	-1.54407	0.0510591	0.3243	-0.378616	0.917233	-0.517977	-1.10554	-0.637976	-1.02809	-0.915925	1.82619	-0.533336	-0.704704	-0.584514	-0.153256	-0.0859676	-0.329958	0.259097
GSM2236052	GSE84437	116	0	TMEcluster-A	-0.0793427	-0.454589	-0.691399	-1.22841	-0.224992	1.95038	-0.839738	-1.06814	-0.355717	-0.270413	-0.517977	0.296474	-0.637976	0.162841	0.195451	-0.425642	-0.533336	-0.704704	1.2214	-0.153256	-0.0859676	0.326092	-0.892056
GSM2236053	GSE84437	22	1	TMEcluster-A	1.78753	-0.454589	-0.691399	-0.837733	-0.224992	1.11783	-0.839738	-0.949232	4.63273	-0.516642	-0.517977	0.172246	0.0218994	-1.02809	-1.04027	1.25569	3.56931	-0.616567	-0.251717	-0.153256	1.1223	-0.329958	0.360354
GSM2236054	GSE84437	79	1	TMEcluster-A	-0.0897392	-0.454589	0.0608298	-1.22841	-0.224992	0.183068	-0.839738	-0.143142	0.135692	0.909259	-0.517977	0.771122	-0.637976	-0.150976	-0.808493	2.72816	1.33393	0.0985333	0.00853386	-0.153256	-0.0859676	0.26214	1.18688
GSM2236055	GSE84437	133	0	TMEcluster-A	0.618798	-0.454589	-0.441281	-0.463662	-0.224992	1.19419	0.230998	-0.48918	-0.150576	0.718254	-0.517977	0.182782	0.347215	-1.02809	-0.534088	1.21342	0.782779	-0.578391	-0.207095	-0.153256	-0.0859676	-0.329958	-1.12459
GSM2236056	GSE84437	128	0	TMEcluster-A	1.94361	-0.454589	-0.691399	0.299935	-0.224992	1.28915	-0.839738	0.218146	0.0773899	-0.516642	-0.517977	0.536037	-0.637976	-0.773403	-1.34056	0.485306	-0.533336	1.58199	-0.553744	-0.153256	-0.0859676	-0.329958	-0.8923
GSM2236057	GSE84437	37	1	TMEcluster-A	0.797426	1.11443	-0.452497	0.446238	-0.224992	-0.743859	-0.522965	0.920768	-0.542082	0.879444	-0.517977	-0.794178	-0.637976	-0.877575	0.755989	0.445182	-0.533336	-0.414543	1.00479	-0.153256	-0.0859676	-0.329958	-0.11587
GSM2236058	GSE84437	136	0	TMEcluster-A	2.55892	-0.454589	-0.691399	-0.120147	-0.224992	0.340852	-0.607746	-0.727052	-0.417113	-0.516642	-0.517977	0.0731304	-0.637976	-0.664603	0.0690602	-0.157664	0.263231	0.882923	1.02943	-0.153256	-0.0859676	-0.329958	0.524721
GSM2236059	GSE84437	137	0	TMEcluster-B	-0.971767	-0.136524	-0.691399	-1.22841	-0.224992	1.47084	-0.839738	-1.06814	1.53182	-0.516642	-0.140788	-0.219406	-0.637976	1.71038	-0.338873	1.32564	-0.533336	-0.704704	-0.954928	-0.153256	-0.0859676	-0.329958	0.821915
GSM2236060	GSE84437	37	1	TMEcluster-B	-0.202352	-0.454589	-0.349815	-1.22841	2.70573	0.723636	0.776154	-1.06814	-0.558429	-0.516642	0.998706	-1.03196	3.13442	0.170008	-1.193	0.040969	-0.533336	2.4187	-0.883187	-0.153256	-0.0859676	1.14603	1.51094
GSM2236061	GSE84437	129	0	TMEcluster-A	-0.755757	-0.454589	0.291175	-0.591792	-0.224992	0.309548	-0.513966	-1.06814	-0.558429	3.05174	-0.517977	-0.484015	-0.637976	0.0116284	0.0297407	1.7788	0.652041	-0.704704	0.12345	-0.153256	-0.0859676	-0.329958	0.48174
GSM2236062	GSE84437	129	0	TMEcluster-A	0.259449	-0.454589	-0.298858	-0.903066	-0.224992	0.477237	0.805157	-0.306812	-0.558429	-0.516642	-0.0513015	-0.561286	-0.637976	-0.250546	0.77378	1.50462	-0.533336	-0.704704	0.0559042	-0.153256	-0.0859676	-0.0638232	0.316852
GSM2236063	GSE84437	131	0	TMEcluster-B	-0.662842	-0.319635	-0.207831	-0.747485	-0.224992	0.551908	1.00354	-1.06814	-0.558429	-0.516642	1.67136	-0.948256	1.21787	0.900608	-0.927748	-1.34443	-0.0181871	2.18199	-0.121127	-0.153256	-0.0859676	-0.329958	0.785608
GSM2236064	GSE84437	77	1	TMEcluster-B	-0.785998	-0.209423	-0.691399	0.627077	-0.224992	-0.0940824	2.23817	-1.06814	-0.558429	-0.516642	2.2734	-1.10554	-0.637976	0.947554	-1.0762	-0.531993	0.827915	0.127373	-0.764665	-0.153256	-0.0859676	-0.329958	-0.0885798
GSM2236065	GSE84437	119	0	TMEcluster-A	0.289993	-0.454589	0.445563	-0.937926	-0.224992	1.15731	-0.839738	0.598852	-0.558429	0.832004	-0.517977	0.396335	-0.637976	-0.504072	0.723266	1.29293	1.20646	-0.704704	-0.992457	-0.153256	-0.0859676	-0.329958	0.304371
GSM2236066	GSE84437	127	0	TMEcluster-A	0.823825	2.42162	1.00943	-0.109512	-0.224992	2.00687	-0.839738	-1.06814	-0.558429	-0.516642	-0.517977	-1.04991	-0.637976	-1.02809	-1.30185	1.61003	-0.533336	0.153747	-1.56753	-0.153256	-0.0859676	-0.329958	0.261019
GSM2236067	GSE84437	17	1	TMEcluster-C	-0.753894	-0.12673	-0.691399	0.0910234	-0.224992	1.09022	1.0294	-1.02603	-0.558429	-0.516642	-0.517977	-1.10554	-0.637976	-0.265619	2.70197	-0.0748257	1.18489	-0.191367	-1.18071	-0.153256	-0.0859676	-0.329958	-0.533653
GSM2236068	GSE84437	42	1	TMEcluster-A	0.903269	2.38314	-0.691399	1.3713	-0.224992	0.438148	-0.839738	-0.140515	-0.516547	-0.516642	-0.517977	0.0966523	-0.637976	-0.765428	-0.692427	0.0455089	-0.533336	-0.577601	-0.156337	-0.153256	-0.0859676	-0.329958	1.08764
GSM2236069	GSE84437	115	0	TMEcluster-C	-0.528841	0.147737	1.91623	1.79651	-0.224992	-0.323115	-0.839738	1.92825	2.68049	-0.516642	-0.517977	-0.621192	-0.637976	-0.275455	-0.928261	0.785301	-0.533336	-0.704704	-1.43243	-0.153256	-0.0859676	-0.329958	-2.84081
GSM2236070	GSE84437	124	0	TMEcluster-C	-0.315098	-0.454589	-0.691399	1.47797	-0.224992	-1.54407	2.78128	0.858355	-0.558429	-0.151029	1.60619	-0.861161	-0.136881	-0.542927	0.714549	-0.634184	0.121961	-0.684878	0.091459	-0.153256	-0.0859676	-0.329958	-0.900273
GSM2236071	GSE84437	114	0	TMEcluster-C	-0.510739	-0.454589	-0.691399	-0.769165	-0.224992	0.787485	1.49927	0.682185	-0.558429	0.840197	-0.517977	-0.79658	-0.345187	-0.616067	0.829479	-0.43431	-0.372558	0.432911	0.0477355	-0.153256	-0.0859676	-0.329958	-1.58809
GSM2236072	GSE84437	33	1	TMEcluster-C	-0.523396	-0.454589	-0.691399	0.543552	-0.224992	-1.29536	1.43103	0.0648279	-0.558429	1.50789	-0.517977	0.269668	-0.242529	-0.524663	1.1876	0.323929	0.470281	-0.704704	0.693812	-0.153256	-0.0859676	-0.329958	0.481961
GSM2236073	GSE84437	22	1	TMEcluster-A	-0.374354	-0.454589	-0.691399	-0.191056	-0.224992	0.434105	-0.839738	-0.211864	0.92038	-0.516642	-0.517977	0.743542	-0.28679	0.928398	-0.594086	0.0200098	0.581619	-0.704704	0.59441	-0.153256	-0.0859676	-0.329958	-0.795546
GSM2236074	GSE84437	143	0	TMEcluster-C	-0.0501081	-0.454589	2.14959	0.50948	-0.224992	-0.312543	0.604206	-0.0830303	0.0891912	-0.516642	-0.517977	0.228761	-0.637976	1.13042	-0.481133	-0.327807	-0.533336	-0.704704	-1.44698	-0.153256	-0.0859676	-0.329958	-1.38816
GSM2236075	GSE84437	39	1	TMEcluster-A	-0.776177	-0.454589	-0.691399	-0.404109	-0.224992	0.469181	-0.0176788	0.0251698	0.551726	-0.516642	-0.517977	1.57057	1.69916	-1.02809	0.089085	-0.0665964	0.00233075	0.588435	1.11418	-0.153256	-0.0859676	-0.329958	0.933545
GSM2236076	GSE84437	35	0	TMEcluster-C	-0.150623	-0.454589	-0.691399	0.767482	-0.224992	-1.01218	0.315628	0.876783	-0.558429	0.716649	-0.517977	1.28609	-0.637976	0.313068	1.64605	-0.523439	1.34302	-0.704704	-0.601722	-0.153256	-0.0859676	-0.329958	-0.80372
GSM2236077	GSE84437	38	0	TMEcluster-C	-0.971767	-0.454589	0.67933	1.05954	-0.224992	-1.18416	0.786134	-0.52506	-0.558429	1.92852	-0.517977	1.71053	-0.637976	-0.895514	1.49709	0.366463	0.0277394	0.31695	-0.487108	-0.153256	-0.0859676	-0.329958	-1.5126
GSM2236078	GSE84437	142	0	TMEcluster-B	-0.142969	-0.454589	-0.559269	0.00646252	-0.224992	1.01141	-0.839738	-1.06814	-0.558429	-0.516642	1.85963	-1.10554	3.81123	1.31071	-1.3496	-0.0553613	1.60706	-0.704704	-1.63924	4.5519	17.0656	-0.329958	-1.44682
GSM2236079	GSE84437	141	0	TMEcluster-C	-0.548212	-0.454589	-0.691399	-0.136986	-0.224992	-0.952374	2.09711	0.857663	-0.0680563	-0.268407	0.51044	-1.10554	0.165243	0.944845	0.846309	-0.813373	0.367239	-0.400741	-0.295201	-0.153256	-0.0859676	-0.329958	-0.926998
GSM2236080	GSE84437	14	1	TMEcluster-B	-0.921209	-0.454589	-0.691399	-1.22841	-0.224992	1.18723	2.56923	-0.65046	-0.558429	-0.516642	-0.204582	0.213111	0.468102	0.86217	-0.88187	-1.47219	-0.533336	1.30886	-1.30771	-0.153256	-0.0859676	1.79944	0.32037
GSM2236082	GSE84437	131	0	TMEcluster-A	2.09427	0.338875	1.83621	0.187354	-0.224992	0.638321	-0.839738	0.648297	-0.493378	-0.268933	-0.517977	0.284651	-0.637976	-0.992747	-0.26202	-0.692019	0.480759	-0.386639	-0.496158	-0.153256	-0.0859676	-0.329958	-1.26518
GSM2236083	GSE84437	7	1	TMEcluster-A	-0.130819	-0.454589	2.21625	-0.865199	-0.224992	-0.025108	-0.367096	-0.380501	-0.405391	6.38336	-0.517977	-0.52977	-0.637976	-0.912645	-0.650649	-0.531291	0.0632247	-0.704704	0.92919	-0.153256	-0.0859676	-0.329958	-1.68326
GSM2236084	GSE84437	128	0	TMEcluster-B	-0.859916	-0.367002	-0.691399	-0.893482	2.06725	-0.0250118	1.2985	-0.0884091	-0.558429	-0.516642	1.15857	0.182187	-0.637976	-0.259835	-0.364932	0.0485557	-0.193696	2.06217	0.236181	-0.153256	-0.0859676	0.440684	-0.0545828
GSM2236085	GSE84437	152	0	TMEcluster-C	0.176337	-0.454589	-0.0479679	1.81645	-0.224992	-1.00192	3.21801	-0.78537	-0.558429	-0.516642	-0.517977	1.16193	-0.0657813	-0.902003	0.574438	-0.505182	0.0896949	-0.558647	-0.957496	-0.153256	-0.0859676	-0.329958	-0.717845
GSM2236086	GSE84437	149	0	TMEcluster-C	-0.70963	0.0742186	0.937508	-0.00698678	-0.224992	-0.286821	2.48052	-0.132597	-0.558429	1.05569	2.2428	-1.10554	-0.600773	-0.71553	0.942209	-0.622684	-0.151166	-0.41159	-0.997395	-0.153256	-0.0859676	-0.252037	-0.178601
GSM2236087	GSE84437	155	0	TMEcluster-C	0.134406	-0.454589	0.0170359	0.322241	-0.224992	0.0631063	1.11195	-0.688603	-0.558429	-0.516642	-0.517977	-0.473753	-0.637976	1.00444	1.09741	0.233522	-0.533336	-0.704704	-1.63924	0.83424	-0.0859676	-0.287393	0.495859
GSM2236088	GSE84437	34	1	TMEcluster-B	-0.177379	-0.454589	-0.691399	-0.872364	-0.224992	1.67567	1.4624	-1.06814	-0.558429	-0.516642	1.30702	-0.906807	0.895142	-0.476551	-1.00421	-0.0315578	-0.533336	1.89707	-0.611985	-0.153256	-0.0859676	-0.0802893	-0.0892273
GSM2236089	GSE84437	144	0	TMEcluster-C	-0.28406	-0.454589	0.321703	-0.402522	-0.224992	0.709179	1.91266	-1.06814	-0.558429	-0.501356	0.0287664	0.146315	-0.637976	-0.614288	0.734262	-0.202939	1.90422	-0.555492	-0.497967	-0.153256	-0.0859676	-0.329958	-0.476945
GSM2236090	GSE84437	31	1	TMEcluster-A	0.272311	1.2414	-0.0751407	0.116339	-0.224992	0.579401	0.2654	-0.420729	-0.558429	-0.516642	-0.517977	-0.246546	-0.637976	-0.566741	0.742288	-0.428825	-0.533336	-0.147156	-0.0959326	-0.153256	-0.0859676	-0.329958	0.0191917
GSM2236091	GSE84437	123	1	TMEcluster-C	0.69653	-0.454589	-0.111168	-0.896361	-0.224992	0.75509	0.875366	-0.446424	-0.558429	-0.0520279	-0.517977	-1.10554	-0.12672	0.336879	1.5899	-0.139867	-0.533336	-0.0207489	-0.986366	-0.153256	-0.0859676	-0.329958	-0.047309
GSM2236092	GSE84437	149	0	TMEcluster-C	0.742129	-0.454589	-0.0199494	-0.266265	-0.224992	0.841063	1.30525	-0.704474	-0.558429	-0.516642	-0.517977	-0.537738	-0.0710733	-0.244341	1.14733	-0.503266	-0.533336	-0.543422	-0.575253	-0.153256	-0.0859676	-0.329958	-0.301059
GSM2236093	GSE84437	151	0	TMEcluster-C	1.10686	-0.454589	0.278286	-0.0609287	-0.224992	0.543664	1.31696	-0.418106	-0.558429	-0.184303	-0.517977	-0.243294	-0.56163	-0.416774	0.896829	-0.35743	0.626994	-0.704704	-0.922537	-0.153256	-0.0859676	-0.329958	-0.503423
GSM2236094	GSE84437	37	1	TMEcluster-A	-0.587639	-0.440743	-0.691399	-0.967422	-0.224992	1.36461	1.0371	-0.887458	-0.558429	-0.516642	0.0910362	-0.843017	2.37431	-0.39848	2.17777	-0.940175	0.929621	-0.698234	-0.232852	-0.153256	-0.0859676	-0.329958	-0.398692
GSM2236095	GSE84437	150	0	TMEcluster-B	0.779793	-0.454589	-0.0422582	-1.22841	-0.224992	1.54853	1.02018	-0.879769	-0.558429	0.268983	-0.517977	-0.492599	-0.637976	0.0510164	1.24377	-0.46894	-0.533336	-0.688635	-1.05643	1.06423	-0.0859676	-0.329958	0.0288202
GSM387789	GSE15459	30.47	0	TMEcluster-A	-0.844784	1.41269	-0.541635	-0.196081	-0.296209	-0.167335	-0.722953	-0.550329	1.70574	-0.341631	-0.72544	3.33162	0.625511	-0.675649	1.91575	0.753639	0.320227	-0.662875	-0.000233548	-0.658554	-0.281187	-0.313452	0.386111
GSM387791	GSE15459	20.33	0	TMEcluster-C	0.480802	1.23667	0.309541	0.395682	1.82688	-1.18381	0.762635	-0.173755	-0.397617	1.39428	-0.72544	-0.441506	-0.450269	0.00330995	2.75893	-1.38772	-0.0888084	-0.662875	-0.666613	-0.658554	0.465484	-0.626351	-1.41626
GSM387792	GSE15459	11.73	1	TMEcluster-C	-0.251407	-0.879764	0.0225873	0.350879	-0.296209	-0.162528	0.321566	-0.186936	-0.397617	0.126596	-0.72544	0.278669	-0.450269	-0.00151368	0.576509	0.47454	0.117524	-0.483057	0.607485	-0.658554	-0.37503	-0.0145907	0.261759
GSM387794	GSE15459	26.27	1	TMEcluster-A	-0.758527	-0.123938	-0.145386	0.806652	-0.296209	0.378185	-0.552897	-0.706624	0.422482	1.2572	0.153394	-0.441506	-0.450269	-0.69939	0.556154	0.248631	-0.360404	-0.662875	1.56641	-0.658554	-0.37503	-0.626351	1.39563
GSM387795	GSE15459	27.07	0	TMEcluster-A	0.0227083	-0.879764	-1.41909	1.01224	3.62888	2.21521	-0.722953	-0.954493	-0.397617	-0.784463	-0.72544	-0.441506	0.829012	-0.760615	1.16465	-0.0393645	0.082635	-0.376797	2.22053	-0.658554	-0.37503	-0.626351	1.06129
GSM387796	GSE15459	20.5	1	TMEcluster-C	-0.844784	1.64976	-0.957226	3.28679	-0.296209	-1.92555	0.476786	2.19284	-0.397617	0.745606	-0.72544	0.782984	-0.450269	0.189186	5.24545	-1.63863	-0.582323	-0.662875	-0.356509	-0.658554	-0.37503	-0.626351	-2.49129
GSM387800	GSE15459	7	0	TMEcluster-B	-0.452286	1.59392	-0.758854	-0.832972	-0.296209	1.85528	-0.722953	-0.399851	-0.397617	-0.784463	0.105684	-0.215742	-0.0828668	0.688385	-0.356793	-0.685624	-0.582323	2.81084	0.180284	-0.658554	-0.37503	-0.469978	-0.920785
GSM387801	GSE15459	20.13	0	TMEcluster-A	-0.844784	0.894511	-0.40335	-0.833016	-0.296209	-0.472625	-0.722953	0.422764	2.6179	0.379829	-0.72544	1.53256	-0.100457	-0.760615	-0.346439	0.22173	0.748399	4.2891	0.066237	-0.658554	-0.37503	0.80335	-1.3158
GSM387802	GSE15459	15.2	0	TMEcluster-C	0.613644	-0.879764	1.76454	-0.59233	-0.296209	-1.24776	0.632415	0.0123329	-0.397617	-0.254801	-0.72544	-0.231175	-0.450269	0.447062	0.580461	-1.63863	-0.582323	1.45315	-0.883513	0.264127	-0.37503	-0.626351	-1.64683
GSM387803	GSE15459	32.7	0	TMEcluster-C	0.553154	2.3687	-0.919987	0.364995	-0.296209	1.17089	0.155904	1.08952	-0.397617	0.527258	-0.72544	-0.441506	-0.424502	-0.0615104	2.38286	-0.741825	-0.447648	-0.662875	-0.883513	-0.658554	-0.37503	-0.591616	-3.34553
GSM387804	GSE15459	12.67	0	TMEcluster-A	-0.844784	-0.260085	-1.33422	2.78493	-0.296209	1.26754	-0.719133	-0.954493	-0.397617	1.20604	-0.72544	-0.20034	1.6051	-0.760615	0.839625	0.00689361	1.1151	-0.662875	1.66459	-0.658554	-0.37503	-0.397445	0.895853
GSM387805	GSE15459	10.9	0	TMEcluster-C	-0.773798	0.0851976	-0.736448	-0.940152	0.506524	-1.00304	1.50693	3.8845	-0.397617	2.39473	-0.185097	0.938814	-0.450269	0.840882	3.4643	-1.63863	-0.582323	2.04444	-0.883513	-0.658554	0.479131	-0.496116	-2.86167
GSM387806	GSE15459	19.73	0	TMEcluster-C	0.64444	-0.452304	1.27538	0.451295	-0.296209	-0.525064	0.793054	0.718136	-0.397617	1.39586	-0.72544	-0.441506	-0.450269	-0.467164	-0.318375	-0.869881	-0.582323	-0.611949	-0.3206	-0.411211	-0.37503	-0.460133	0.334087
GSM387807	GSE15459	4.93	0	TMEcluster-B	0.101764	0.0632395	-1.22779	-0.940152	1.02893	-0.432686	-0.722953	-0.954493	-0.397617	-0.784463	1.03906	-0.441506	-0.450269	3.62	-1.09122	-0.00422903	-0.470796	-0.374434	-0.883513	1.09694	-0.234218	1.97591	-1.59834
GSM387808	GSE15459	5.87	0	TMEcluster-B	-0.688609	-0.320089	-0.991252	-0.940152	-0.296209	0.790269	0.380814	0.788768	-0.397617	-0.784463	1.40182	-0.441506	-0.450269	0.6644	-0.26521	0.169026	-0.26132	3.07178	-0.883513	1.5352	2.05147	-0.00703608	-1.00464
GSM387809	GSE15459	4.7	0	TMEcluster-B	-0.844784	-0.0974555	-0.902177	-0.940152	-0.296209	1.86174	1.68617	1.18109	-0.397617	-0.784463	0.841666	-0.4088	-0.450269	0.63581	0.349185	-1.14203	-0.421785	0.221636	-0.883513	1.76334	3.46802	0.624492	-0.268038
GSM387810	GSE15459	3.7	0	TMEcluster-C	2.24465	2.24625	-0.410605	-0.637285	-0.296209	-1.35919	-0.362371	1.40964	1.52019	-0.784463	-0.72544	-0.441506	-0.450269	0.934471	1.20172	-0.77876	-0.582323	-0.662875	-0.883513	0.206071	0.484565	-0.626351	-1.65719
GSM387811	GSE15459	3.23	1	TMEcluster-B	-0.844784	0.702911	-0.952943	-0.940152	1.11716	-0.312524	1.95414	1.08813	-0.397617	-0.283927	2.35168	-0.441506	-0.450269	0.94913	0.293763	-0.909204	-0.582323	2.83928	-0.883513	1.66663	-0.37503	0.140731	0.219473
GSM387812	GSE15459	11.1	0	TMEcluster-A	1.23956	-0.879764	0.160115	0.559005	-0.296209	-0.175102	-0.593486	-0.798819	-0.397617	-0.784463	-0.72544	0.24913	-0.450269	-0.624395	-0.328189	0.717391	-0.333562	-0.324788	1.11557	-0.658554	-0.37503	-0.0684263	0.230403
GSM387813	GSE15459	3.93	0	TMEcluster-B	-0.844784	-0.0620848	-0.940317	-0.940152	-0.296209	0.729441	0.780303	-0.954493	-0.397617	-0.784463	4.1689	-0.441506	-0.450269	0.783442	1.92158	-0.497932	-0.582323	-0.662875	-0.883513	3.01399	-0.37503	0.176904	-1.49933
GSM387814	GSE15459	17.2	1	TMEcluster-C	-0.458466	0.251698	-0.00624546	1.73884	-0.296209	0.93057	1.40953	-0.134152	-0.397617	-0.784463	-0.72544	-0.441506	0.418641	-0.760615	0.781946	-0.416501	-0.0477626	-0.656574	0.285612	-0.658554	-0.37503	-0.626351	0.504886
GSM387815	GSE15459	62.93	0	TMEcluster-B	-0.575726	-0.505624	2.1973	0.157862	-0.296209	-0.121736	0.287935	-0.954493	-0.397617	0.054865	0.290629	-0.441506	-0.450269	-0.582771	-0.82591	-0.850244	-0.582323	-0.238363	-0.581513	-0.264544	-0.37503	0.0272624	-0.60565
GSM387816	GSE15459	1.67	1	TMEcluster-C	2.12673	-0.879764	-0.409049	2.84406	-0.296209	-1.17026	0.562283	1.54491	-0.397617	2.00341	-0.72544	-0.441506	-0.13634	-0.760615	1.35822	0.128702	-0.582323	-0.662875	-0.701265	-0.658554	0.127168	-0.626351	0.703691
GSM387817	GSE15459	88.07	0	TMEcluster-B	1.29227	-0.209718	0.899807	-0.0302274	-0.296209	0.0211636	-0.722953	0.457016	-0.397617	-0.784463	2.16879	-0.441506	-0.450269	-0.760615	-0.16924	-0.765182	-0.582323	-0.390366	-0.883513	1.03553	-0.37503	0.0907872	-0.30697
GSM387818	GSE15459	108.7	0	TMEcluster-B	0.270537	-0.879764	-0.591007	-0.940152	-0.296209	0.794017	0.402857	0.999616	1.02201	-0.784463	0.626366	-0.441506	-0.450269	0.976882	0.445024	-0.205298	-0.582323	-0.662875	-0.207233	0.675518	-0.37503	0.496716	-0.239325
GSM387819	GSE15459	29.17	1	TMEcluster-A	-0.844784	0.776495	-0.910948	-0.295118	-0.296209	0.046717	-0.223331	-0.779779	0.428255	-0.784463	0.0174579	-0.0785705	3.63923	-0.760615	-0.416227	2.69696	0.666098	-0.535967	-0.559087	1.32633	-0.37503	0.438583	0.638284
GSM387820	GSE15459	129.9	0	TMEcluster-B	2.00791	-0.879764	1.16657	-0.940152	-0.296209	-0.694525	-0.208635	0.986896	-0.397617	-0.784463	3.1499	-0.441506	-0.450269	-0.760615	-0.671877	-1.24967	1.2023	-0.570586	-0.883513	1.0253	-0.37503	0.833436	-0.211463
GSM387821	GSE15459	122.97	0	TMEcluster-A	0.0130999	-0.879764	2.38592	0.26711	-0.296209	0.0633347	-0.591395	-0.576741	-0.254588	-0.784463	0.295383	-0.441506	-0.208707	-0.760615	-1.10273	-1.10733	-0.542269	-0.368397	0.086422	-0.508122	-0.37503	-0.5898	0.17387
GSM387822	GSE15459	0.2	0	TMEcluster-B	-0.844784	0.228691	-1.01682	-0.463515	-0.296209	-0.592121	-0.722953	-0.663736	1.16804	-0.784463	-0.72544	1.68398	-0.450269	2.8833	-0.388076	0.0420119	-0.582323	0.350517	-0.883513	1.42549	0.337336	1.01481	-0.0959498
GSM387823	GSE15459	6.6	1	TMEcluster-C	-0.0366075	-0.879764	-0.823104	0.890716	-0.296209	-1.07261	1.78981	0.593063	0.437052	-0.784463	-0.72544	0.0148278	-0.424502	0.163969	1.47885	1.0809	3.67853	-0.662875	-0.124783	-0.658554	-0.37503	-0.315925	0.385912
GSM387824	GSE15459	126.5	0	TMEcluster-A	-0.16525	-0.879764	-1.0059	0.64549	-0.296209	0.342486	-0.324009	-0.643704	-0.397617	0.0268962	-0.72544	-0.27341	1.49522	-0.760615	-0.0140362	1.62918	-0.388896	-0.662875	2.32668	-0.658554	-0.128141	0.0447824	0.632686
GSM387825	GSE15459	125.5	0	TMEcluster-A	0.322869	-0.879764	1.75878	-0.282282	-0.296209	-0.856123	-0.177244	-0.83632	-0.397617	-0.624077	-0.72544	-0.240447	-0.450269	0.355919	-0.672225	-0.00154385	-0.582323	-0.48711	-0.11485	-0.658554	-0.37503	-0.563925	0.0837875
GSM387826	GSE15459	11.07	0	TMEcluster-A	0.178067	0.142733	-1.40334	0.779073	-0.296209	1.0233	-0.106022	0.375829	-0.397617	3.53458	-0.72544	-0.0745418	-0.450269	-0.760615	-0.232358	0.399569	1.37891	-0.662875	1.45318	-0.658554	0.155538	-0.626351	0.769406
GSM387827	GSE15459	93.2	0	TMEcluster-A	-0.844784	0.295326	0.587899	-0.940152	-0.296209	1.04603	-0.323997	-0.954493	-0.397617	-0.784463	-0.72544	-0.441506	2.70314	-0.760615	-0.71743	0.823497	-0.582323	-0.233963	0.534195	0.112415	-0.37503	-0.626351	0.667234
GSM387828	GSE15459	117.77	0	TMEcluster-C	-0.844784	-0.259369	0.189573	0.492931	-0.203017	-1.92555	1.56087	-0.000252218	-0.397617	0.700177	-0.72544	1.04168	-0.450269	1.09195	1.47992	0.412702	0.0107651	-0.662875	-0.883513	-0.206365	-0.37503	-0.306602	-0.79584
GSM387829	GSE15459	127.47	0	TMEcluster-A	0.124571	0.674674	1.70804	-0.707713	-0.296209	0.872651	-0.722953	0.282704	-0.397617	-0.285395	-0.689719	-0.441506	-0.450269	-0.760615	-1.02675	-0.80383	-0.582323	-0.331777	-0.432997	-0.327728	0.71215	-0.626351	0.374589
GSM387830	GSE15459	87	1	TMEcluster-C	0.583204	-0.879764	0.25428	-0.253255	-0.296209	0.370911	0.178062	1.22336	-0.397617	-0.610383	0.556401	-0.441506	-0.450269	-0.760615	1.49044	-0.290088	0.804132	-0.662875	-0.883513	1.01847	-0.37503	0.289764	0.383136
GSM387831	GSE15459	10.37	1	TMEcluster-C	0.816966	-0.879764	1.29564	-0.296726	-0.296209	-1.3898	0.390191	1.00423	-0.397617	-0.418358	-0.72544	0.389685	-0.450269	-0.313746	-0.559831	0.0645614	-0.582323	-0.026166	-0.541438	-0.417658	1.16528	0.491518	-1.63979
GSM387832	GSE15459	125.53	0	TMEcluster-A	0.785217	-0.216123	0.257256	0.182104	-0.296209	0.575616	-0.722953	-0.954493	-0.397617	-0.312858	-0.72544	-0.303521	-0.450269	-0.760615	-0.751025	0.144506	-0.273333	-0.510332	1.69724	-0.653663	-0.37503	-0.354108	1.04123
GSM387833	GSE15459	8.53	1	TMEcluster-B	-0.844784	0.39471	0.908273	-0.80253	-0.296209	-0.150172	-0.722953	-0.954493	0.942842	-0.784463	0.38256	0.515838	-0.450269	0.671986	-0.177985	0.595219	0.123314	-0.662875	-0.883513	-0.389474	-0.228327	-0.463983	0.358264
GSM387834	GSE15459	41.97	1	TMEcluster-A	0.80164	-0.879764	-0.289008	0.804031	-0.296209	-0.0110331	-0.722953	-0.406377	-0.397617	-0.280936	-0.72544	0.693524	-0.450269	-0.760615	0.011079	-0.282836	1.76797	-0.662875	2.3454	-0.658554	-0.230585	-0.597444	0.829797
GSM387835	GSE15459	13.07	1	TMEcluster-C	-0.844784	-0.668463	0.347157	-0.742758	-0.296209	-1.11909	-0.169217	1.17608	-0.397617	0.000951145	-0.72544	1.26019	-0.450269	0.740138	0.938381	-0.282417	0.111579	-0.662875	-0.883513	0.212522	-0.37503	3.13361	0.232373
GSM387836	GSE15459	19.77	1	TMEcluster-A	-0.723167	-0.646885	-0.892194	-0.174717	-0.296209	2.74226	-0.722953	-0.037596	-0.397617	0.252625	-0.72544	0.705309	-0.450269	-0.275439	0.454704	0.539781	0.0405329	-0.208226	0.084716	-0.658554	3.21537	-0.133086	0.492255
GSM387837	GSE15459	37.5	1	TMEcluster-C	-0.844784	0.0236208	-1.31455	1.22636	-0.296209	-0.338178	-0.639395	0.873433	-0.397617	-0.784463	-0.72544	1.46942	-0.450269	1.28962	-0.0674727	1.91173	-0.582323	-0.662875	0.277711	-0.658554	-0.37503	-0.218094	0.651012
GSM387838	GSE15459	30.4	1	TMEcluster-A	-0.844784	-0.583991	-1.25855	-0.931909	-0.296209	-0.133677	-0.722953	-0.954493	-0.397617	-0.322129	-0.72544	0.190961	1.28375	-0.760615	-0.786437	1.91679	-0.0830223	-0.624462	3.34379	-0.658554	-0.37503	3.47321	1.19683
GSM387839	GSE15459	0.3	0	TMEcluster-C	-0.844784	-0.377698	0.448532	-0.317734	-0.296209	-1.81362	0.594039	1.62033	-0.397617	1.70139	-0.72544	0.191396	-0.450269	0.0761361	3.21369	-0.0642978	-0.202568	-0.662875	-0.883513	-0.39196	0.21893	0.710462	-0.749475
GSM387840	GSE15459	129.27	0	TMEcluster-A	-0.452389	-0.879764	-0.767202	0.378393	-0.296209	1.39132	-0.50502	-0.954493	-0.397617	-0.784463	-0.643983	0.443802	4.13831	-0.760615	-1.06679	-0.156944	-0.582323	-0.606789	3.60229	-0.658554	0.571814	-0.626351	1.15418
GSM387841	GSE15459	4.17	1	TMEcluster-A	1.32443	-0.879764	0.849044	0.858414	-0.296209	-0.470184	-0.722953	-0.626656	-0.397617	-0.0216426	-0.72544	-0.305879	1.81544	-0.760615	-0.50383	0.369536	1.05772	-0.662875	-0.679294	-0.598115	1.75647	-0.312745	0.768213
GSM387842	GSE15459	17.13	1	TMEcluster-C	-0.844784	-0.82854	-1.01317	3.73588	-0.296209	-1.24502	-0.0762066	1.8717	-0.397617	-0.784463	-0.72544	1.75289	0.0674454	-0.670576	1.28799	1.47107	-0.0654158	1.17993	-0.47543	-0.658554	0.693548	0.0211391	0.266853
GSM387843	GSE15459	2.27	1	TMEcluster-C	-0.844784	-0.879764	1.53557	0.599634	-0.296209	-0.484747	0.691381	-0.954493	-0.397617	-0.784463	-0.72544	-0.268276	-0.450269	-0.684505	-0.180292	0.927279	-0.582323	-0.662875	-0.122707	-0.658554	-0.37503	-0.0453238	-1.19435
GSM387845	GSE15459	4.13	1	TMEcluster-A	0.264352	-0.174113	-0.873814	0.346266	-0.296209	-0.0297142	-0.586403	0.00758552	-0.397617	-0.271962	-0.72544	0.13198	0.484115	0.55732	0.675333	1.24899	-0.537819	-0.662875	0.617984	-0.658554	0.0326157	-0.626351	0.522468
GSM387846	GSE15459	94.3	1	TMEcluster-C	-0.844784	0.532585	-0.830318	-0.703267	-0.296209	-1.36791	0.426515	2.03846	-0.397617	-0.498254	-0.72544	0.377817	-0.450269	1.46501	1.33525	0.786673	-0.262245	0.0445061	-0.883513	0.811883	-0.37503	0.890538	0.309087
GSM387847	GSE15459	110.53	1	TMEcluster-A	-0.215312	-0.879764	-0.648497	0.358815	4.16791	1.01383	-0.722953	-0.575257	-0.397617	0.0512936	-0.72544	2.30612	8.00435	-0.760615	-0.809964	-0.45892	-0.173911	-0.491707	0.0460246	0.774794	-0.37503	0.447861	0.751759
GSM387848	GSE15459	99.43	1	TMEcluster-A	0.500417	-0.879764	1.3834	-0.331427	-0.296209	-0.578839	-0.490603	0.140411	-0.397617	3.1642	-0.72544	0.277138	-0.450269	-0.274268	-0.150955	-0.816232	-0.455755	-0.598852	-0.61162	-0.257977	-0.328866	0.253218	0.726169
GSM387849	GSE15459	11.4	1	TMEcluster-A	-0.844784	-0.535533	-1.28768	0.122987	-0.296209	0.355552	-0.619905	-0.780257	-0.397617	-0.610968	-0.00569106	-0.441506	0.990234	-0.760615	-0.420918	2.14823	-0.582323	0.511458	2.51431	-0.538205	-0.37503	1.13481	1.12869
GSM387850	GSE15459	6.47	1	TMEcluster-A	1.99223	-0.180935	-0.782935	0.575203	6.17304	0.817076	-0.51792	-0.954493	-0.397617	0.237198	-0.72544	-0.116003	0.0236099	-0.760615	-0.728657	0.190344	-0.582323	0.00571419	0.159854	0.00135058	0.289098	-0.0908847	1.34982
GSM387851	GSE15459	10.87	1	TMEcluster-A	-0.771922	-0.252436	-1.33103	0.925763	-0.296209	0.28002	-0.722953	-0.0289131	-0.397617	-0.784463	-0.72544	0.0756859	0.168159	-0.760615	0.0266311	2.53731	3.10012	-0.662875	1.22834	-0.658554	1.65088	-0.626351	1.04772
GSM387852	GSE15459	17	1	TMEcluster-A	-0.524386	-0.786151	-0.742509	-0.64155	-0.296209	0.3131	-0.722953	-0.856273	-0.397617	-0.784463	0.202342	-0.441506	3.16679	0.414899	-0.986999	3.19222	-0.582323	-0.662875	-0.187457	0.296025	-0.37503	0.220205	0.941775
GSM387853	GSE15459	16.6	1	TMEcluster-A	-0.844784	0.21524	-0.907304	0.299477	-0.296209	0.531867	-0.722953	-0.954493	-0.397617	0.638234	-0.72544	1.32956	-0.264273	-0.760615	0.22822	0.00492909	0.303974	-0.613638	3.3421	-0.658554	-0.37503	-0.216091	0.865244
GSM387854	GSE15459	0.43	0	TMEcluster-A	2.64528	-0.879764	0.622838	-0.838337	-0.296209	-0.78528	-0.722953	-0.295072	-0.0451873	0.788129	-0.72544	0.825187	0.389982	-0.53391	1.24671	-0.171604	-0.0384447	-0.662875	-0.189161	-0.658554	-0.37503	-0.626351	-0.827578
GSM387855	GSE15459	114.63	0	TMEcluster-B	1.20842	-0.879764	-0.496875	-0.479514	-0.296209	0.883048	-0.722953	-0.954493	1.35183	-0.784463	1.26646	-0.441506	-0.450269	1.3695	-0.270811	-0.49427	-0.387224	0.212025	0.10073	-0.378517	-0.37503	-0.18078	-0.851072
GSM387856	GSE15459	26.17	1	TMEcluster-B	-0.844784	-0.769614	-0.656239	-0.940152	2.66867	-1.66242	-0.460023	-0.954493	-0.397617	-0.784463	1.19603	-0.441506	-0.450269	3.50167	-0.251348	-1.17743	-0.582323	-0.525587	-0.883513	4.66124	-0.37503	1.65383	1.16034
GSM387857	GSE15459	8.07	1	TMEcluster-A	0.425609	2.7534	0.0896895	-0.225359	4.48607	-0.488263	0.216339	1.02979	-0.397617	-0.344917	-0.703114	-0.441506	-0.450269	-0.397773	-0.910732	-0.929934	-0.582323	0.763841	0.352053	-0.658554	-0.37503	-0.626351	1.3504
GSM387858	GSE15459	9.27	1	TMEcluster-A	-0.844784	-0.79493	-1.21554	0.0262119	-0.296209	0.498931	-0.65184	-0.400145	0.2524	-0.406354	-0.72544	1.19888	-0.450269	0.0727934	-0.0135036	2.25345	3.93025	-0.662875	0.657307	-0.658554	-0.37503	-0.251117	0.706875
GSM387859	GSE15459	11.07	1	TMEcluster-A	-0.672991	-0.879764	1.62713	0.233902	-0.296209	-0.533466	0.450398	-0.954493	-0.397617	1.57336	-0.72544	-0.441506	-0.450269	0.125371	-0.527962	-0.245167	-0.582323	-0.662875	-0.472483	-0.658554	-0.37503	0.327477	1.3669
GSM387860	GSE15459	0.23	0	TMEcluster-C	-0.0382947	-0.222612	0.471481	-0.0503823	-0.296209	-0.605557	0.442818	-0.316992	-0.397617	-0.226325	1.16671	-0.441506	-0.270348	-0.192499	0.780671	0.0102528	-0.582323	1.57715	-0.21553	-0.633103	-0.37503	-0.626351	0.468315
GSM387861	GSE15459	23.2	1	TMEcluster-A	-0.844784	-0.405547	-1.24139	-0.326307	-0.296209	0.0598642	0.778582	-0.244053	-0.397617	-0.784463	-0.369527	-0.441506	-0.450269	0.585263	-0.523877	2.73598	1.67201	1.30771	0.286984	-0.658554	-0.37503	-0.385204	-0.957752
GSM387862	GSE15459	4.7	1	TMEcluster-B	0.619925	-0.879764	0.403339	-0.878595	0.890759	-0.364081	-0.0180146	-0.954493	-0.397617	-0.784463	1.49597	-0.441506	-0.450269	0.810289	-0.516316	0.245492	-0.582323	-0.423254	-0.454363	0.54959	-0.37503	0.3586	1.34916
GSM387863	GSE15459	45.07	0	TMEcluster-B	0.0620692	-0.879764	1.53466	-0.389931	-0.296209	-0.603001	0.0506787	-0.954493	-0.397617	-0.784463	1.44508	-0.441506	0.206419	-0.494399	-1.21306	-0.787873	-0.582323	0.10895	0.0953027	0.16112	-0.37503	1.72257	1.51977
GSM387864	GSE15459	4.3	1	TMEcluster-B	-0.79781	-0.207036	-0.0160635	1.81041	-0.296209	-0.400113	-0.722953	-0.266177	-0.397617	0.105168	-0.72544	-0.441506	-0.450269	0.110849	-0.278398	0.681237	0.0376244	-0.247938	-0.883513	2.41129	-0.37503	-0.259922	0.162973
GSM387865	GSE15459	24.37	1	TMEcluster-A	-0.844784	1.26183	-1.10529	-0.940152	1.27806	-0.579004	-0.722953	-0.954493	-0.397617	1.98183	-0.72544	0.560599	0.120521	-0.525971	-0.783536	2.65435	1.25123	-0.333962	-0.883513	1.76365	7.33485	-0.626351	0.289647
GSM387866	GSE15459	13.37	1	TMEcluster-A	-0.844784	-0.377314	-1.14242	0.911843	-0.296209	0.773082	-0.711493	-0.885385	-0.397617	1.2986	-0.72544	-0.441506	2.46401	-0.760615	-0.0848856	1.99778	-0.582323	-0.662875	0.73032	-0.658554	-0.37503	2.02478	0.808222
GSM387867	GSE15459	22.8	1	TMEcluster-A	1.08183	-0.879764	1.98443	-0.527002	-0.296209	-0.60789	-0.470094	-0.839654	-0.397617	-0.784463	-0.218555	-0.441506	-0.405176	-0.362174	-1.09224	-1.00804	0.821536	-0.00591867	0.159733	-0.658554	-0.37503	0.0570533	0.0461117
GSM387868	GSE15459	66.57	0	TMEcluster-B	-0.758048	-0.057431	-1.30197	-0.940152	-0.296209	-0.767541	-0.593074	0.0869608	-0.397617	-0.433717	0.528903	-0.441506	-0.450269	4.01144	-0.165237	-0.00737035	-0.582323	-0.56484	-0.883513	1.29816	-0.37503	1.97178	1.31507
GSM387869	GSE15459	20.87	1	TMEcluster-A	0.0987455	0.138929	-0.987693	-0.250277	-0.296209	1.25382	-0.142414	-0.954493	-0.397617	0.753687	-0.72544	-0.441506	-0.450269	-0.760615	-0.109033	0.495738	3.1915	0.519852	1.48925	-0.658554	-0.37503	-0.592868	0.778185
GSM387870	GSE15459	4.6	1	TMEcluster-A	-0.844784	1.02263	0.650611	-0.604298	-0.296209	0.559214	-0.722953	0.870782	0.891265	0.407929	-0.72544	0.425523	-0.075064	-0.760615	0.0367627	0.171621	-0.582323	-0.470186	-0.239208	-0.464484	-0.37503	-0.0474966	0.740892
GSM387871	GSE15459	13.03	1	TMEcluster-C	-0.844784	-0.350995	1.57094	0.838588	-0.296209	-0.265148	0.072271	0.624958	-0.397617	-0.505445	-0.72544	-0.441506	-0.118747	-0.572025	-0.341671	-0.470815	0.713066	-0.662875	-0.219618	-0.440508	-0.37503	-0.435437	-0.331409
GSM387872	GSE15459	85.63	0	TMEcluster-A	-0.184468	-0.879764	-0.043851	-0.126864	-0.296209	-0.26339	0.0148064	-0.353422	-0.397617	-0.77214	-0.145992	-0.441506	-0.450269	-0.133653	-0.777955	1.53965	-0.201803	1.56586	0.818518	-0.658554	-0.37503	-0.292764	0.234865
GSM387873	GSE15459	98.1	0	TMEcluster-C	0.235276	1.42325	0.611121	0.606563	-0.296209	-1.58294	1.4254	-0.954493	-0.381823	1.02927	0.748442	-0.441506	-0.450269	0.337624	0.486542	-0.576206	-0.582323	-0.662875	-0.883513	0.0583227	-0.37503	-0.626351	-1.47523
GSM387874	GSE15459	14.33	1	TMEcluster-B	-0.844784	-0.440794	-0.105282	-0.940152	-0.296209	-0.381319	-0.722953	0.628889	2.43477	-0.607335	-0.72544	-0.33521	-0.450269	0.9	0.484755	-0.0824982	-0.582323	-0.662875	-0.883513	1.38988	4.25306	1.96272	1.13821
GSM387875	GSE15459	88.7	0	TMEcluster-A	-0.792225	-0.648108	-0.53628	-0.71452	-0.296209	0.312755	-0.722953	-0.567876	0.646797	2.66792	-0.72544	-0.441506	-0.450269	-0.663523	0.374464	1.83556	-0.582323	-0.662875	1.24773	0.0678941	0.294517	-0.128655	0.974686
GSM387876	GSE15459	25.17	1	TMEcluster-A	-0.711287	0.87409	-1.26704	0.611074	-0.296209	1.68802	-0.722953	0.0560606	-0.397617	2.52472	-0.72544	1.06406	1.32432	-0.760615	-0.0680028	0.281353	-0.582323	-0.290166	1.12051	-0.658554	0.711855	-0.626351	0.716183
GSM387877	GSE15459	72.5	0	TMEcluster-C	-0.0528927	-0.879764	0.221131	1.07717	-0.296209	-0.88946	1.96083	0.588141	-0.397617	0.553962	-0.72544	0.20384	-0.450269	0.274349	1.24502	-0.213914	-0.205169	-0.662875	-0.297604	-0.658554	-0.37503	-0.46061	0.160911
GSM387878	GSE15459	23.53	0	TMEcluster-A	-0.844784	2.35615	-0.450623	-0.940152	2.37315	0.245963	-0.722953	-0.954493	-0.397617	-0.784463	0.982429	-0.441506	-0.0490762	-0.760615	-1.0102	-0.135691	-0.582323	-0.662875	2.84127	-0.529723	-0.37503	0.727543	0.976581
GSM387879	GSE15459	31.2	1	TMEcluster-A	1.27897	-0.879764	1.89509	0.543416	-0.296209	-0.352677	-0.715313	-0.954493	-0.397617	-0.784463	-0.149659	-0.441506	-0.450269	-0.622524	-0.819857	-0.992636	-0.582323	-0.350646	0.270141	-0.658554	-0.37503	-0.34685	0.067383
GSM387880	GSE15459	74.97	0	TMEcluster-A	-0.844784	1.02458	0.480961	-0.591422	-0.296209	1.00356	-0.722953	-0.810743	-0.397617	-0.00807814	-0.72544	0.214271	-0.450269	-0.760615	-0.694664	-0.332988	0.398914	-0.662875	1.73812	-0.658554	-0.37503	-0.350577	1.04479
GSM387881	GSE15459	12.27	1	TMEcluster-A	-0.844784	0.687084	0.124473	-0.298294	-0.296209	1.06472	-0.722953	0.39046	-0.397617	-0.33538	-0.72544	-0.441506	-0.450269	-0.476587	-0.667007	0.00269317	0.524053	0.858319	0.845807	-0.658554	-0.37503	-0.153175	1.12023
GSM387882	GSE15459	16.37	1	TMEcluster-B	-0.336808	0.957125	1.27742	-0.940152	0.80013	-1.05536	-0.722953	1.40279	0.104545	0.132414	1.43354	-0.441506	-0.450269	-0.239543	-0.982536	-1.15078	-0.400121	-0.400018	-0.883513	2.03012	-0.37503	0.608349	0.1302
GSM387883	GSE15459	42.5	0	TMEcluster-C	1.75249	0.014549	0.225276	-0.940152	-0.296209	-1.42544	-0.722953	0.956556	0.717521	1.85126	-0.294905	-0.441506	-0.450269	0.841224	0.277222	0.135235	-0.208911	-0.662875	-0.883513	0.0925995	-0.37503	-0.626351	-0.464927
GSM387884	GSE15459	9.87	1	TMEcluster-B	-0.782048	-0.80929	1.59143	-0.940152	-0.296209	0.432741	-0.722953	-0.954493	-0.128628	0.75327	0.965034	-0.441506	-0.450269	-0.456904	-1.16492	-0.00769345	0.388043	1.07803	-0.69437	-0.275263	-0.37503	0.161766	-0.576486
GSM387885	GSE15459	38.43	0	TMEcluster-A	4.39318	2.09128	-1.42373	0.613981	5.51885	0.214853	-0.218453	0.210112	0.00560415	-0.784463	0.146684	-0.441506	-0.443827	-0.167494	-0.158282	-0.995925	-0.582323	0.16974	-0.547935	-0.658554	-0.37503	-0.585973	-0.774875
GSM387886	GSE15459	72.77	0	TMEcluster-C	0.632764	-0.879764	1.95548	0.132153	-0.296209	-1.13409	0.917585	-0.711388	-0.397617	-0.322976	-0.557844	-0.250845	-0.450269	-0.102925	-0.222706	-0.766338	-0.582323	-0.0479751	-0.670124	-0.658554	-0.0582143	-0.0600421	0.133342
GSM387887	GSE15459	5.83	1	TMEcluster-A	1.00176	-0.879764	0.450049	0.543369	-0.296209	0.467368	-0.156436	-0.500465	-0.397617	1.54162	-0.72544	-0.441506	-0.450269	-0.510215	-0.605646	-1.11144	1.16002	0.142875	0.160378	-0.658554	3.06247	-0.253167	0.436613
GSM387888	GSE15459	35.7	0	TMEcluster-A	-0.844784	0.392105	-0.513433	-0.940152	-0.296209	1.67037	-0.722953	-0.954493	-0.397617	-0.784463	2.33933	-0.441506	-0.129176	-0.760615	-0.245242	0.196518	0.521301	-0.0371636	1.8539	-0.092011	-0.37503	-0.394936	0.962226
GSM387889	GSE15459	11.07	1	TMEcluster-B	1.25611	0.606488	-0.349708	-0.89701	-0.296209	-0.654356	-0.428256	2.14014	-0.397617	-0.763924	0.486535	-0.441506	-0.450269	0.21229	-0.375047	-0.481299	-0.582323	1.50584	-0.883513	2.61893	-0.37503	0.0261772	1.00517
GSM387890	GSE15459	0.4	0	TMEcluster-B	0.881717	3.65228	-0.995031	-0.940152	-0.296209	0.742081	-0.722953	2.96473	-0.397617	-0.784463	2.22842	-0.441506	-0.450269	-0.518712	-0.338676	-1.01728	-0.221309	-0.662875	-0.883513	2.31911	1.65619	-0.626351	-2.08638
GSM387891	GSE15459	64.57	0	TMEcluster-A	0.256421	0.323721	0.0615227	0.456853	-0.296209	1.07337	-0.722953	-0.403771	-0.397617	0.938708	0.613903	-0.441506	-0.322093	-0.653778	0.140067	-0.57364	-0.523218	-0.46535	-0.184573	1.18175	-0.37503	-0.626351	-0.690886
GSM387892	GSE15459	7.97	1	TMEcluster-A	0.145217	-0.09811	-1.00051	-0.940152	-0.296209	0.483327	-0.722953	-0.758411	4.64002	-0.784463	0.647912	-0.248487	-0.450269	0.379388	0.962829	0.780826	-0.160312	-0.662875	1.28754	-0.658554	-0.37503	-0.626351	0.849311
GSM387893	GSE15459	52.97	0	TMEcluster-A	2.62036	1.01357	-1.06282	0.27528	-0.296209	-0.451945	-0.429611	1.51573	-0.397617	-0.784463	-0.134972	-0.441506	1.17522	-0.760615	-1.02967	0.88837	-0.582323	0.12045	0.547824	-0.481375	-0.37503	0.614797	0.767242
GSM387894	GSE15459	66.57	0	TMEcluster-B	-0.844784	-0.847581	0.3281	-0.553776	0.146724	-0.990346	-0.722953	0.582266	3.02583	-0.784463	-0.72544	1.57819	-0.450269	0.327355	-0.698438	-0.150234	-0.582323	0.346803	-0.883513	3.10035	-0.37503	1.77332	-1.92193
GSM387895	GSE15459	2.63	0	TMEcluster-A	0.214875	-0.879764	1.23149	0.0649032	-0.296209	-0.0145184	0.669449	0.104884	-0.397617	1.00478	-0.72544	-0.441506	0.508383	-0.760615	-0.542728	-0.346513	-0.582323	0.0774843	-0.183085	-0.3732	0.245014	-0.438157	-0.106769
GSM387896	GSE15459	9.97	1	TMEcluster-A	-0.379289	0.209295	-1.18565	-0.940152	-0.296209	0.00323904	-0.722953	-0.954493	0.888303	-0.784463	-0.72544	0.729459	-0.450269	0.396625	-0.647067	2.05044	-0.582323	2.23592	0.711	-0.345869	-0.37503	0.92849	0.0677022
GSM387897	GSE15459	24.3	0	TMEcluster-A	0.568625	0.56722	0.887571	-0.101857	-0.296209	0.231939	-0.722953	0.115913	1.1362	-0.317011	0.314757	-0.441506	0.0128249	-0.370848	-0.443946	-0.624365	-0.350455	-0.338531	-0.135568	-0.658554	-0.37503	-0.626351	-0.328552
GSM387898	GSE15459	78.6	1	TMEcluster-A	1.35569	-0.577288	-1.42373	1.37307	-0.296209	0.371645	-0.394987	0.244707	-0.397617	1.31686	-0.72544	0.809919	0.423381	-0.760615	-0.251148	0.279162	-0.577872	-0.346973	2.29457	-0.658554	-0.37503	-0.399698	1.13784
GSM387899	GSE15459	11.77	1	TMEcluster-A	1.11445	-0.301165	-1.42373	0.98598	-0.296209	0.0268988	0.109423	0.437275	-0.397617	-0.0517829	-0.271235	-0.441506	-0.450269	-0.760615	-0.459209	1.9792	1.03281	-0.647124	1.53297	-0.658554	-0.37503	-0.473178	1.13572
GSM387900	GSE15459	5.97	0	TMEcluster-B	0.392445	0.247846	1.11201	-0.257239	-0.296209	0.735707	-0.722953	0.685654	-0.326543	-0.784463	2.14424	-0.441506	-0.450269	-0.191143	-0.859502	-1.5874	-0.514648	0.0838629	-0.723979	0.714299	-0.181035	-0.626351	-0.288001
GSM387901	GSE15459	82.87	0	TMEcluster-B	-0.82988	-0.457803	-0.932596	-0.874831	-0.296209	1.25905	-0.573109	0.976966	-0.397617	-0.784463	1.63029	-0.441506	2.32419	-0.264246	-0.890911	-0.266564	-0.582323	3.75689	-0.883513	0.765664	3.57352	2.49555	-2.22919
GSM387902	GSE15459	59.57	1	TMEcluster-C	2.88326	2.83158	-0.544696	1.68436	-0.296209	-1.09447	0.268625	1.63233	-0.397617	0.523806	-0.72544	-0.441506	-0.450269	0.0109428	-0.981037	-1.0498	-0.582323	-0.291546	-0.40482	-0.658554	-0.37503	-0.626351	0.51975
GSM387903	GSE15459	41.23	1	TMEcluster-A	-0.844784	1.10141	-1.24391	-0.151519	-0.296209	1.72505	-0.722953	-0.954493	7.37795	-0.784463	-0.72544	3.79663	-0.025415	0.955552	-0.0878189	-0.84443	0.428686	-0.261891	-0.156778	-0.658554	-0.37503	-0.284834	-1.92642
GSM387904	GSE15459	74.33	0	TMEcluster-B	-0.844784	-0.508476	1.01668	-0.940152	-0.296209	0.26848	-0.501811	-0.451735	-0.397617	-0.784463	1.13495	-0.441506	-0.450269	0.25022	-0.566249	-0.597359	0.518237	1.37218	-0.421642	-0.214257	0.534844	0.518838	-0.52894
GSM387905	GSE15459	6.27	1	TMEcluster-A	-0.805375	0.0171123	-1.00372	-0.179316	-0.296209	0.747066	-0.722953	-0.954493	0.00228065	0.33851	-0.253979	-0.262822	-0.127528	-0.722848	0.0827504	2.00912	2.91989	-0.469825	1.10754	-0.658554	-0.37503	0.0818871	0.817404
GSM387906	GSE15459	13	0	TMEcluster-A	-0.844784	0.414932	0.365895	-0.940152	-0.296209	1.09349	-0.722953	-0.0701831	0.0435177	0.0071362	0.455758	-0.441506	-0.450269	-0.760615	-0.938893	1.17136	-0.30547	-0.218417	0.010233	0.719316	-0.37503	-0.626351	1.1279
GSM387907	GSE15459	63.53	0	TMEcluster-B	-0.844784	0.0602265	0.398273	-0.940152	-0.296209	0.0870702	-0.722953	-0.954493	-0.265318	-0.483226	0.500545	-0.441506	-0.450269	2.30392	-0.999961	0.164762	0.328485	-0.662875	-0.883513	0.501459	-0.37503	-0.626351	-0.938273
GSM387908	GSE15459	18.27	1	TMEcluster-B	-0.844784	0.784355	-0.0864521	-0.640243	-0.296209	0.934936	-0.592586	-0.954493	2.87897	-0.784463	-0.72544	0.252522	-0.167364	0.831629	-0.23111	-0.00596552	-0.582323	0.0678245	-0.883513	1.09412	-0.0250278	-0.136875	0.100459
GSM387909	GSE15459	28.83	1	TMEcluster-A	-0.233807	0.509651	-0.51149	0.368643	-0.296209	0.0289527	-0.722953	0.992302	-0.397617	0.72951	-0.72544	-0.441506	0.675634	-0.760615	-0.570994	0.985397	0.55846	0.0456801	0.902374	-0.658554	1.72229	-0.462109	1.04665
GSM387910	GSE15459	22.27	1	TMEcluster-A	0.167187	-0.879764	1.84972	0.728646	-0.296209	0.254104	-0.722953	-0.954493	-0.397617	-0.520488	-0.72544	-0.437418	-0.450269	-0.618527	-0.421404	-0.522099	0.196717	-0.662875	-0.374426	-0.281657	-0.37503	-0.573999	0.448063
GSM387911	GSE15459	24.9	1	TMEcluster-A	-0.0252105	-0.879764	1.03168	0.936177	-0.296209	-0.401633	0.504062	-0.954493	-0.397617	0.878958	-0.72544	-0.441506	-0.210837	-0.216143	-0.860495	-0.000783636	-0.124496	-0.318236	0.229056	-0.453269	-0.37503	-0.626351	0.243847
GSM387912	GSE15459	17.1	0	TMEcluster-A	-0.0635235	-0.879764	1.36326	-0.940152	0.919438	0.242204	-0.488192	-0.345158	-0.397617	-0.597465	0.0354356	-0.441506	-0.36414	-0.416683	-0.932983	-0.678512	-0.477733	0.896783	0.437397	-0.575172	-0.37503	0.745207	0.287374
GSM387913	GSE15459	7.03	1	TMEcluster-C	-0.330783	-0.879764	1.57003	0.53684	-0.296209	-0.386048	-0.37344	0.153291	-0.397617	0.459978	-0.72544	-0.441506	0.301798	-0.480812	-0.133697	-0.322466	-0.0162149	0.0487768	-0.590133	-0.658554	-0.37503	0.0490261	-1.12239
GSM387914	GSE15459	6.6	1	TMEcluster-B	-0.606593	-0.879764	-1.38788	-0.940152	-0.296209	-1.25245	-0.722953	-0.535751	0.100753	-0.594688	-0.441164	-0.441506	-0.450269	7.10227	-0.664275	-0.684281	-0.582323	-0.662875	-0.883513	0.762781	-0.15702	0.0221093	0.34514
GSM387915	GSE15459	157.83	0	TMEcluster-C	0.0475931	-0.626432	0.205709	-0.940152	-0.296209	0.354816	1.79908	-0.954493	-0.397617	1.0018	0.409919	-0.441506	-0.372071	-0.210357	1.03596	-0.0968744	-0.454096	-0.567994	0.640322	-0.658554	-0.37503	-0.626351	0.62674
GSM387916	GSE15459	63.7	1	TMEcluster-C	4.52849	-0.151843	-0.363445	-0.436161	-0.296209	-1.06821	0.125203	3.04125	-0.397617	0.278316	1.09884	-0.441506	-0.450269	0.485711	-0.504944	-0.998694	-0.582323	-0.442649	-0.883513	0.127281	-0.37503	-0.62057	-1.09536
GSM387917	GSE15459	11.37	0	TMEcluster-B	-0.401151	-0.0907289	-0.280385	-0.473026	-0.296209	-0.341171	-0.722953	1.12255	0.229657	-0.784463	-0.72544	1.16244	-0.450269	-0.15507	0.118875	-0.571369	-0.582323	4.35687	0.0129936	-0.658554	1.88362	1.42909	-0.991235
GSM387918	GSE15459	155.03	0	TMEcluster-B	-0.081466	2.644	-0.00360007	-0.940152	-0.296209	1.17578	-0.256851	1.6297	-0.397617	-0.784463	2.63739	-0.441506	-0.450269	-0.549874	-0.788138	-1.41478	-0.282128	-0.205547	-0.883513	1.28905	-0.213465	0.603062	0.36928
GSM387919	GSE15459	10.43	0	TMEcluster-B	-0.456506	-0.0151726	-1.00475	-0.120875	-0.296209	-1.9127	0.0546121	0.242874	2.50485	-0.294075	-0.72544	-0.441506	-0.450269	2.49971	-0.655223	1.46883	-0.0337307	-0.662875	-0.260846	-0.197495	-0.37503	1.73646	0.605522
GSM387920	GSE15459	22.07	0	TMEcluster-B	0.923266	-0.879764	0.968724	-0.850945	-0.0723873	0.709089	0.154305	-0.204235	-0.397617	-0.784463	1.24951	-0.441506	0.809062	0.00993928	-0.716547	-0.779689	-0.582323	0.531097	-0.588462	-0.198014	-0.37503	-0.493304	-0.500281
GSM387922	GSE15459	153.9	0	TMEcluster-C	-0.285246	-0.879764	-0.604758	-0.940152	-0.296209	0.105533	5.2532	0.748134	-0.397617	-0.0977671	1.65379	-0.441506	-0.450269	0.388488	1.35905	0.397554	0.225834	-0.662875	-0.883513	-0.290945	-0.37503	-0.199042	-1.02968
GSM387923	GSE15459	0.03	0	TMEcluster-B	-0.844784	0.866077	-1.13666	-0.940152	-0.296209	0.268195	-0.722953	-0.954493	-0.198858	-0.784463	0.740876	-0.160628	-0.450269	1.64795	-0.00655994	2.4804	-0.442125	-0.662875	0.0270362	-0.658554	-0.37503	-0.626351	-0.300999
GSM387924	GSE15459	4.83	0	TMEcluster-B	-0.530905	0.791357	1.17726	-0.940152	-0.296209	1.32569	-0.722953	-0.954493	-0.255351	-0.784463	1.60681	-0.441506	-0.450269	-0.137275	-0.434847	-1.24521	-0.582323	0.831571	-0.735778	0.468054	-0.37503	-0.626351	0.432243
GSM387925	GSE15459	123.63	1	TMEcluster-A	0.246907	-0.407792	1.13009	-0.255096	-0.296209	0.248584	-0.109018	0.575454	-0.397617	1.16509	-0.72544	-0.441506	0.044272	-0.760615	-0.907365	-0.178786	-0.582323	-0.192101	-0.256163	0.384648	-0.367336	-0.626351	0.77902
GSM387926	GSE15459	3.23	0	TMEcluster-C	0.702874	-0.879764	0.273672	1.47288	-0.296209	-1.81193	0.204789	0.7254	-0.318646	-0.784463	-0.72544	-0.00224435	-0.450269	0.0947409	1.00771	-0.166448	-0.582323	1.89588	-0.100413	-0.658554	-0.37503	-0.128581	-0.874812
GSM387927	GSE15459	39.4	1	TMEcluster-C	-0.73537	-0.258559	-0.700048	0.83291	-0.296209	-1.58689	0.0294971	1.02395	-0.397617	-0.784463	-0.72544	7.12458	-0.450269	-0.107173	2.57021	-0.755594	-0.356024	-0.662875	1.17461	-0.658554	-0.37503	0.0351585	0.607197
GSM387928	GSE15459	27.17	0	TMEcluster-C	0.0626041	-0.879764	0.777134	1.12258	-0.296209	-1.92555	1.65996	0.571568	-0.397617	-0.784463	0.446126	-0.116162	-0.450269	1.36075	0.164849	-0.54575	-0.582323	-0.226308	-0.80367	-0.658554	-0.37503	-0.114644	-0.876985
GSM387929	GSE15459	11.53	1	TMEcluster-A	1.96281	-0.879764	0.850916	-0.802558	-0.296209	-0.423575	-0.342102	-0.954493	-0.0137942	0.236454	-0.72544	-0.441506	-0.450269	-0.180533	-0.30917	-0.150771	-0.582323	-0.438885	0.421087	-0.624876	-0.37503	0.33247	0.786754
GSM387930	GSE15459	13.47	1	TMEcluster-C	-0.844784	-0.729396	0.366723	0.746007	-0.296209	-0.289084	1.83595	1.22804	-0.397617	-0.784463	0.495736	-0.441506	-0.450269	0.227635	1.05458	-0.475877	1.57082	-0.662875	-0.770951	-0.303517	-0.37503	-0.163106	-0.92357
GSM387931	GSE15459	148.9	0	TMEcluster-B	-0.371666	0.895884	0.370771	-0.902638	-0.0433354	-0.0291155	0.123098	-0.954493	-0.397617	-0.698247	1.10463	-0.441506	1.05726	-0.230389	-1.21747	0.198546	-0.582323	1.5957	0.143794	-0.658554	-0.37503	0.723779	1.36041
GSM387932	GSE15459	26.53	1	TMEcluster-C	0.0168803	-0.879764	1.88051	-0.0348695	-0.296209	-0.399811	0.754245	-0.954493	-0.397617	-0.784463	-0.198201	-0.441506	-0.450269	0.113699	-0.515006	-0.642987	-0.582323	-0.46927	-0.427128	-0.508565	-0.37503	-0.179204	-1.16917
GSM387933	GSE15459	13	0	TMEcluster-A	0.683965	-0.879764	0.918478	0.226161	-0.296209	0.129446	0.120954	-0.954493	-0.397617	-0.641372	-0.417371	-0.441506	-0.450269	-0.760615	-0.607071	-0.102893	0.274964	-0.532571	1.063	-0.658554	0.313094	-0.626351	0.729816
GSM387934	GSE15459	141.77	0	TMEcluster-A	0.183244	-0.439093	0.510804	-0.154725	-0.296209	-0.499325	0.191741	0.304412	1.76318	0.173041	-0.151779	-0.441506	-0.450269	-0.318641	-1.08646	-0.499152	3.46542	0.915256	-0.577709	-0.658554	-0.37503	1.4314	0.116833
GSM387935	GSE15459	5.07	1	TMEcluster-B	-0.0503189	1.38322	-0.0713118	-0.354253	-0.296209	0.475781	1.64815	-0.954493	-0.397617	0.342397	1.34651	-0.441506	-0.450269	-0.423323	-0.983787	-0.736831	0.125343	1.92875	0.0427598	-0.277449	-0.37503	-0.221533	-0.720263
GSM387936	GSE15459	32.63	1	TMEcluster-A	-0.5912	-0.879764	0.722278	-0.178278	-0.296209	-0.328633	0.806173	-0.954493	-0.397617	-0.177703	0.25768	-0.441506	-0.450269	-0.571727	-0.596062	0.296631	-0.582323	0.129722	1.29979	-0.648771	-0.37503	0.655708	1.52387
GSM387938	GSE15459	6.4	1	TMEcluster-B	1.07268	-0.879764	0.100882	1.60964	-0.296209	0.261725	1.21886	-0.954493	-0.397617	-0.784463	2.318	-0.441506	1.58053	-0.513089	0.536842	-1.22181	-0.0274777	-0.662875	-0.883513	1.5524	-0.272813	-0.626351	-0.0422608
GSM387939	GSE15459	146.13	0	TMEcluster-A	0.367136	1.79223	1.6101	-0.457568	-0.296209	0.389324	-0.722953	-0.954493	-0.397617	-0.0400106	-0.72544	-0.441506	0.413127	-0.327702	-0.987535	-1.63863	-0.582323	-0.477781	-0.658044	0.755478	-0.305784	-0.626351	-1.05035
GSM387940	GSE15459	3.27	1	TMEcluster-A	1.02709	-0.879764	0.598248	-0.0266112	-0.296209	0.162755	0.0283416	0.684017	-0.397617	-0.499971	-0.72544	-0.117545	-0.450269	-0.760615	-0.00566865	0.621113	-0.25879	-0.496329	-0.0337892	-0.577909	-0.37503	-0.339831	0.495355
GSM387941	GSE15459	19.67	1	TMEcluster-B	-0.844784	1.01641	0.00368788	-0.615409	0.745977	-1.16057	-0.722953	-0.954493	-0.107006	-0.763924	1.31803	-0.441506	-0.450269	0.958882	-0.278204	-0.110564	0.388918	-0.426758	-0.883513	4.15054	-0.37503	-0.252384	-1.1706
GSM387942	GSE15459	0.33	0	TMEcluster-A	-0.41388	-0.879764	0.0912872	0.65872	-0.296209	1.46515	-0.595774	-0.954493	-0.397617	-0.784463	0.101461	-0.441506	0.821437	-0.760615	-0.451593	0.93556	0.185292	1.91256	-0.883513	-0.368943	0.303751	0.308062	0.7474
GSM387943	GSE15459	6.97	0	TMEcluster-A	-0.284171	0.573956	0.634356	-0.940152	0.0261172	0.128546	-0.722953	0.181503	-0.397617	1.04924	-0.72544	2.01115	-0.450269	-0.760615	0.317036	0.333709	-0.501289	-0.607384	0.115096	-0.658554	-0.37503	-0.626351	0.63672
GSM387944	GSE15459	85.63	0	TMEcluster-C	0.333418	3.85517	-0.593454	1.43972	-0.296209	-0.359013	0.269776	0.205945	-0.397617	1.34959	-0.440412	-0.441506	-0.450269	-0.154438	-0.473942	-0.856237	-0.582323	0.207553	-0.796877	0.437049	-0.37503	-0.248092	-1.00109
GSM387945	GSE15459	6.6	0	TMEcluster-B	-0.844784	0.498539	-0.478269	-0.77211	-0.296209	1.28056	-0.505368	-0.954493	-0.397617	-0.784463	2.4814	-0.441506	1.23517	0.958708	-0.121633	-1.14945	-0.568971	-0.0234962	-0.883513	3.39424	-0.37503	0.0105845	0.450874
GSM387946	GSE15459	14.6	1	TMEcluster-A	1.98509	-0.588786	0.722435	0.054138	-0.296209	-0.058744	0.751241	-0.954493	-0.397617	-0.307258	0.533139	-0.441506	0.248676	-0.153388	0.420546	-0.661572	-0.582323	-0.662875	-0.435539	-0.658554	-0.37503	-0.626351	0.471898
GSM387947	GSE15459	17.9	1	TMEcluster-A	-0.317072	0.706544	0.317402	-0.831523	0.706487	0.451091	0.273969	0.134584	-0.397617	1.20158	-0.72544	-0.441506	0.563595	-0.760615	0.282548	-0.111313	-0.582323	0.367834	-0.518793	0.813668	-0.37503	-0.0886959	0.658209
GSM387948	GSE15459	137.47	0	TMEcluster-C	0.625956	-0.879764	2.27817	0.0399584	-0.296209	-1.21387	0.134603	-0.42966	-0.397617	0.765655	-0.72544	-0.441506	-0.450269	-0.621367	-0.697202	-0.952069	-0.582323	0.887929	-0.741331	-0.179193	-0.37503	-0.0355061	0.0929845
GSM387949	GSE15459	2.6	0	TMEcluster-A	-0.819056	-0.879764	1.89785	-0.454488	-0.296209	0.165447	-0.101419	-0.954493	-0.397617	0.730482	-0.72544	-0.441506	-0.424502	-0.534037	-0.965397	-0.776599	2.64972	0.622046	-0.3654	-0.658554	-0.37503	-0.0460216	-1.96764
GSM387950	GSE15459	12.63	1	TMEcluster-C	0.482893	0.976048	0.336093	0.6861	0.702523	-0.520301	0.177078	-0.00634363	-0.397617	-0.397215	-0.597823	-0.441506	-0.450269	0.501614	1.92186	-1.33654	-0.582323	-0.528728	-0.408747	-0.658554	-0.37503	-0.626351	0.803319
GSM387951	GSE15459	1.57	0	TMEcluster-B	-0.486739	0.906125	0.480186	0.81978	-0.296209	0.273181	-0.722953	0.723439	-0.397617	-0.751601	0.415406	-0.441506	-0.450269	-0.600471	-0.718768	-1.04247	-0.582323	4.41651	-0.485177	-0.430947	-0.37503	-0.291156	-1.51469
GSM387952	GSE15459	133.63	0	TMEcluster-C	-0.844784	-0.101821	-1.03212	1.91397	-0.296209	-1.92555	-0.201255	2.87429	2.38095	-0.784463	-0.72544	6.68284	-0.450269	0.543401	0.189229	-0.343272	-0.582323	1.55589	-0.231262	-0.658554	-0.37503	0.327543	-0.368697
GSM387953	GSE15459	8.6	0	TMEcluster-A	-0.0780264	1.85629	-0.99791	0.521622	-0.296209	-0.644359	-0.146283	-0.369933	0.620974	2.40717	-0.631487	-0.441506	1.78066	-0.760615	0.791169	1.57108	1.31033	0.392819	-0.883513	-0.179377	-0.195912	-0.626351	-0.01627
GSM387954	GSE15459	21.4	1	TMEcluster-B	-0.382501	-0.0636473	-0.91304	-0.940152	-0.296209	1.12724	1.1021	0.740065	3.84949	-0.784463	1.30267	-0.441506	0.972504	0.751465	-0.595634	-0.466497	0.451301	0.370047	0.306077	-0.0877996	-0.37503	-0.626351	0.622159
GSM387955	GSE15459	12.97	1	TMEcluster-A	-0.844784	0.417032	-1.25256	-0.0592889	-0.296209	0.0845707	-0.722953	1.93123	-0.397617	1.00445	1.20484	-0.441506	-0.450269	-0.540353	0.864811	1.8127	2.15266	-0.662875	0.239891	0.0136592	-0.37503	-0.62057	0.310437
GSM387956	GSE15459	12.87	0	TMEcluster-A	-0.0545814	1.02286	-0.51589	-0.307209	3.01103	-0.363063	-0.722953	-0.318725	2.01282	-0.784463	2.78319	-0.441506	3.14855	-0.366127	-1.01943	1.13199	-0.1482	-0.397487	0.0276205	-0.658554	0.46565	-0.626351	0.338609
GSM387957	GSE15459	15.27	1	TMEcluster-A	-0.566722	0.375517	-0.853358	0.645102	-0.296209	1.03143	-0.645798	-0.954493	-0.0415572	-0.176082	-0.72544	-0.441506	-0.0712975	-0.760615	-1.18646	1.15746	-0.532933	-0.572349	1.4757	2.2377	-0.37503	-0.626351	0.379
GSM387958	GSE15459	80.7	0	TMEcluster-A	0.0610146	-0.879764	-0.633957	-0.940152	-0.296209	-0.124343	-0.722953	1.13083	2.29636	-0.784463	1.73459	-0.441506	1.24395	-0.760615	0.493021	2.13691	6.11789	-0.662875	-0.883513	-0.551149	-0.223031	-0.626351	-4.30887
GSM387959	GSE15459	3.27	1	TMEcluster-C	-0.336648	-0.879764	-0.0421235	3.43764	-0.296209	-1.92555	2.19268	0.122586	-0.397617	1.05567	-0.72544	0.0510622	-0.450269	-0.0190771	1.19994	0.356655	0.280712	-0.662875	-0.588263	-0.658554	-0.37503	-0.294181	0.0573183
GSM387960	GSE15459	52.63	1	TMEcluster-A	-0.715493	0.0229635	-0.985526	-0.663553	-0.296209	1.25418	-0.722953	-0.954493	-0.397617	-0.784463	0.712877	-0.441506	0.209582	-0.760615	-0.661051	0.826151	-0.564521	-0.662875	3.95661	-0.658554	-0.37503	-0.288098	1.36679
GSM387961	GSE15459	20.27	1	TMEcluster-C	2.35266	-0.879764	0.0487506	1.58011	-0.296209	-0.185227	0.787578	-0.954493	-0.397617	1.03847	-0.694184	-0.441506	-0.450269	-0.497845	0.420327	-0.339256	-0.582323	-0.463437	-0.0626994	-0.630992	-0.37503	-0.477358	0.475936
GSM387962	GSE15459	9	1	TMEcluster-A	1.23864	-0.879764	0.807728	-0.19085	-0.296209	0.41597	-0.17143	-0.243104	0.621692	0.12867	-0.72544	-0.441506	0.00564754	-0.465518	0.574692	-0.648621	0.456386	-0.662875	-0.206603	-0.336047	-0.37503	-0.626351	0.608877
GSM387963	GSE15459	0.33	0	TMEcluster-C	-0.398835	-0.879764	1.17156	-0.226782	-0.296209	-1.47072	-0.551159	0.787372	1.55323	0.324661	-0.720975	-0.326904	-0.450269	-0.570107	1.69902	0.0346645	0.683539	0.0859136	0.121744	-0.658554	-0.37503	-0.614788	-0.122454
GSM387964	GSE15459	10.57	1	TMEcluster-C	1.25154	-0.879764	1.43494	-0.0442621	-0.296209	-1.92555	0.609359	0.782431	0.371954	1.04752	-0.72544	0.428168	-0.450269	-0.760615	-0.687774	-0.354685	-0.508146	2.12215	-0.364036	-0.658554	-0.37503	-0.626351	-1.04426
GSM387965	GSE15459	58.93	0	TMEcluster-B	-0.648258	0.408948	-1.12768	-0.940152	-0.296209	2.37775	-0.722953	-0.954493	0.316535	-0.784463	-0.72544	1.2043	-0.450269	1.41494	-0.462785	-0.171345	-0.200357	1.11944	-0.497735	0.975583	-0.37503	-0.0542138	0.134193
GSM387966	GSE15459	30	0	TMEcluster-B	-0.278161	-0.879764	-0.500318	-0.940152	-0.296209	2.84945	-0.142844	-0.954493	-0.397617	-0.784463	0.908945	-0.441506	-0.450269	-0.122829	-1.05019	-0.617317	-0.582323	0.328715	1.38428	0.57844	-0.37503	0.543447	-1.74743
GSM387967	GSE15459	138.37	0	TMEcluster-B	-0.844784	0.324579	2.26503	-0.543523	0.322456	-0.0179729	-0.102796	-0.954493	-0.397617	-0.443629	0.945096	-0.441506	-0.450269	-0.360066	-1.21747	-1.05023	-0.582323	0.157987	-0.739771	0.0505989	-0.37503	-0.238131	1.13849
GSM387968	GSE15459	15.33	1	TMEcluster-B	-0.844784	0.82094	-0.0548905	-0.940152	-0.296209	0.67217	-0.688572	0.576363	-0.397617	0.320549	-0.534328	-0.441506	-0.450269	1.00269	-0.409409	-0.0999303	-0.482881	0.387176	-0.883513	0.509317	-0.37503	0.900197	0.0826526
GSM387969	GSE15459	113.23	0	TMEcluster-C	0.0274104	0.382842	-0.143579	2.04286	-0.296209	0.706696	0.837834	0.174119	-0.397617	1.47606	-0.72544	-0.441506	-0.450269	-0.0961121	0.534965	-0.745044	0.0691404	-0.599545	-0.672822	-0.658554	-0.37503	-0.626351	-0.678016
GSM387970	GSE15459	3.13	1	TMEcluster-B	-0.844784	-0.454927	-1.25278	-0.940152	-0.296209	0.50486	-0.722953	-0.954493	-0.397617	-0.784463	0.183503	-0.441506	-0.450269	1.43315	-1.16477	-0.243042	-0.228778	-0.662875	-0.883513	0.410762	3.77467	9.28097	1.26335
GSM387971	GSE15459	23.57	1	TMEcluster-B	-0.675759	-0.879764	-1.01155	-0.940152	-0.296209	1.81158	0.929309	-0.620222	-0.397617	-0.784463	1.05347	0.20004	-0.311344	0.341594	0.169641	0.500743	3.46515	0.151406	-0.349277	-0.658554	1.49001	0.549151	-1.27696
GSM387972	GSE15459	0.33	0	TMEcluster-B	-0.844784	2.52395	-0.133279	-0.207575	-0.296209	-0.047954	0.589604	-0.539014	-0.397617	-0.784463	1.16352	-0.441506	-0.450269	1.11276	0.195266	-0.875633	-0.582323	-0.172809	-0.390559	0.0417847	-0.37503	-0.383962	0.239322
GSM387973	GSE15459	7.33	0	TMEcluster-C	-0.291352	-0.579661	-0.295037	1.12864	-0.296209	-0.66978	0.859967	2.2446	-0.397617	-0.784463	-0.133377	-0.441506	0.835983	-0.760615	2.39169	0.499618	0.124011	0.275082	-0.550926	-0.658554	2.11943	-0.626351	0.217773
GSM387974	GSE15459	134.1	0	TMEcluster-C	-0.695999	-0.879764	0.176982	3.62651	-0.296209	-1.92555	2.71822	0.845688	-0.397617	4.61471	-0.72544	-0.441506	-0.450269	-0.16138	0.0279475	-0.690173	-0.295197	-0.656574	-0.883513	0.431409	-0.37503	-0.00786084	-1.05068
GSM387975	GSE15459	14.83	1	TMEcluster-C	-0.718278	0.182771	-0.827083	-0.272571	-0.296209	-1.92555	4.05305	2.3536	-0.118154	1.76542	-0.72544	1.72776	0.0768524	-0.260681	3.02422	-0.0303579	0.136103	-0.225213	-0.883513	1.38537	-0.37503	-0.626351	-0.192437
GSM387976	GSE15459	123.83	0	TMEcluster-A	1.07445	-0.879764	0.782178	-0.648422	-0.296209	1.05864	-0.435032	-0.414396	0.0712245	-0.784463	-0.72544	-0.441506	1.04479	0.390038	0.723656	-1.07966	-0.0913379	-0.242815	-0.837363	-0.0723427	-0.37503	-0.626351	0.14535
GSM387977	GSE15459	45.8	1	TMEcluster-A	1.54815	0.0328536	0.542159	-0.477597	1.20726	0.418178	-0.722953	-0.11995	-0.397617	0.138105	-0.72544	-0.303688	0.0131117	-0.260144	-0.361513	-0.531442	-0.423003	0.0322078	-0.275405	-0.0502657	-0.37503	-0.626351	-0.140799
GSM387978	GSE15459	39.97	1	TMEcluster-A	-0.205756	0.963908	-0.875879	-0.743451	-0.296209	1.14118	-0.629386	-0.558858	-0.397617	1.92884	-0.72544	0.26726	0.2784	-0.760615	-0.49865	1.21708	-0.582323	-0.61745	1.21361	-0.658554	2.71415	-0.626351	0.822611
GSM387979	GSE15459	6.63	1	TMEcluster-A	-0.844784	2.4768	-0.0675867	-0.940152	4.64405	0.791769	-0.722953	-0.502223	-0.397617	1.99118	0.160446	-0.441506	0.443209	-0.287585	-0.650699	-0.742136	-0.582323	-0.597171	0.531909	-0.658554	0.85731	-0.626351	0.625067
GSM387980	GSE15459	4.37	1	TMEcluster-C	-0.844784	-0.205922	-0.390607	-0.940152	-0.296209	0.324613	0.886534	-0.070465	-0.397617	1.30471	-0.72544	0.712256	-0.450269	0.0560136	1.14653	0.379418	0.683864	-0.662875	0.355024	-0.658554	-0.37503	0.620159	0.590619
GSM387981	GSE15459	24.63	1	TMEcluster-A	-0.844784	0.722219	-1.29924	-0.56945	-0.296209	0.578288	0.234647	-0.0461396	-0.397617	-0.784463	-0.72544	0.712299	-0.450269	0.911461	0.274259	0.827406	-0.582323	1.16653	0.882031	-0.658554	-0.37503	0.0214793	0.0566538
GSM387982	GSE15459	75.53	0	TMEcluster-A	1.36105	0.883867	-0.780583	1.81294	-0.296209	2.3243	1.03282	-0.954493	-0.397617	0.795394	0.495356	-0.441506	-0.450269	-0.760615	-0.288306	-1.03351	-0.217776	-0.204589	-0.574852	-0.27869	-0.37503	-0.494174	-0.0754932
GSM387983	GSE15459	56.9	1	TMEcluster-A	1.95355	-0.879764	1.89313	0.140287	-0.296209	-1.01624	-0.119374	-0.539647	-0.397617	-0.784463	-0.25842	-0.441506	-0.450269	-0.217035	-1.01859	-0.733638	-0.582323	-0.405193	-0.329257	-0.632321	-0.37503	-0.238817	1.38819
GSM387984	GSE15459	2.23	0	TMEcluster-C	-0.844784	-0.630285	-0.915609	3.36464	-0.296209	-1.92555	6.13316	0.537557	-0.397617	-0.784463	2.45564	-0.441506	-0.450269	0.678835	0.780879	-1.50223	-0.564521	-0.662875	-0.883513	2.73689	-0.37503	0.506653	-0.582084
GSM387985	GSE15459	116.6	0	TMEcluster-A	-0.549667	-0.879764	-0.716535	-0.940152	-0.296209	1.21896	0.528355	-0.954493	-0.397617	-0.784463	1.05644	-0.441506	-0.450269	0.354121	-0.0355302	0.630908	-0.55562	0.190031	1.65006	-0.658554	-0.37503	0.120705	0.0506402
GSM387986	GSE15459	1.47	0	TMEcluster-C	0.569047	-0.879764	1.43115	-0.398725	-0.296209	-0.880143	0.261335	0.303923	-0.397617	0.177825	-0.72544	-0.441506	-0.450269	-0.345246	-0.514684	-0.0483621	0.199601	-0.662875	-0.377287	0.426587	-0.37503	-0.22202	-0.641045
GSM387987	GSE15459	7.73	1	TMEcluster-B	-0.844784	1.8549	-0.228876	-0.940152	-0.296209	0.126082	-0.722953	1.9852	1.9707	-0.784463	-0.72544	1.46758	-0.450269	0.995028	-0.455036	-0.514489	-0.114523	-0.662875	-0.883513	1.57781	-0.37503	-0.548026	-0.688861
GSM723465	GSE29272	29.37	0	TMEcluster-A	1.26153	-0.972552	-0.42663	-0.274764	-0.0890871	0.704005	-0.263199	0.678584	-1.32259	-0.114795	-1.28187	-0.400891	0.363366	-0.466492	1.11105	0.594004	0.0426981	-0.718028	-0.615118	1.44376	-0.103425	-0.417805	1.77698
GSM723467	GSE29272	87.67	1	TMEcluster-A	0.246698	-0.204929	-0.377487	0.614031	-0.0890871	1.44505	-0.263199	0.359121	-0.477468	-0.114795	-1.28187	1.26375	-0.275692	-0.466492	-0.294655	0.284562	-0.956436	-0.247702	0.416548	-0.275665	-0.103425	0.307854	1.71525
GSM723469	GSE29272	29.3	0	TMEcluster-B	-1.43105	0.819845	-0.57617	-1.32268	-0.0890871	0.348037	-0.263199	-1.56688	0.209491	-0.114795	1.5115	-0.400891	-0.745837	-0.466492	-1.31687	1.12977	1.85782	0.36374	-0.615118	1.65852	-0.103425	1.75438	1.04256
GSM723471	GSE29272	33.2	0	TMEcluster-A	1.66717	-0.632154	-0.782008	-0.213128	-0.0890871	-0.429854	-0.263199	0.419188	0.250328	-0.114795	-1.28187	2.21707	-0.943408	-0.466492	0.124521	0.430346	-0.0473918	-0.718028	3.2718	-1.51489	-0.103425	0.502068	1.52194
GSM723473	GSE29272	18.27	0	TMEcluster-A	-0.0401512	0.0156814	1.78344	-0.491228	-0.0890871	-0.611146	-0.263199	-0.0575722	-0.132055	-0.114795	-0.482593	-0.400891	-0.596548	-0.316186	-0.588782	-0.0819193	0.423009	-0.663354	1.43494	-1.06734	-0.103425	-0.149814	0.957675
GSM723475	GSE29272	35.93	0	TMEcluster-A	1.96467	-0.972552	0.793972	0.734766	-0.0890871	-0.410562	-0.263199	0.16133	-0.135623	-0.114795	-0.594841	-0.400891	0.442776	-0.466492	-0.73407	0.0720047	-0.498767	-0.718028	0.68631	-0.884979	-0.103425	-0.848504	1.39782
GSM723477	GSE29272	20.27	0	TMEcluster-C	-0.724921	-0.907949	-0.824224	0.50515	-0.0890871	-0.844602	-0.263199	-0.164382	-0.00334883	-0.114795	-0.0332251	0.253143	0.0106318	-0.466492	2.03512	0.865736	1.00657	1.2928	0.801538	-0.754003	-0.103425	1.77635	1.1268
GSM723479	GSE29272	29.8	0	TMEcluster-A	0.298439	-0.451854	-1.51312	1.28898	-0.0890871	1.04166	-0.263199	0.173264	0.566445	-0.114795	-0.0345215	-0.400891	1.21549	-0.466492	0.732859	1.30879	-0.439898	-0.718028	-0.405632	-0.771945	-0.103425	-0.603171	1.39318
GSM723481	GSE29272	6.3	0	TMEcluster-A	0.93929	-0.972552	-0.464714	-0.944899	-0.0890871	0.506501	-0.263199	-1.18555	-1.37354	-0.114795	-0.797391	-0.400891	5.81587	-0.466492	-1.19302	3.50217	-1.3659	-0.718028	-0.615118	0.936549	-0.103425	0.476137	1.04058
GSM723483	GSE29272	26.6	0	TMEcluster-C	-1.43105	1.08794	-0.592203	0.236018	-0.0890871	-0.21918	0.0145523	2.15574	-1.44517	-0.114795	-0.233023	-0.400891	-0.226967	0.0721254	1.30538	0.147708	1.46454	-0.718028	-0.615118	0.21268	-0.103425	-0.848504	-0.152329
GSM723485	GSE29272	19.53	0	TMEcluster-C	0.916126	-0.972552	-0.501582	0.85982	-0.0890871	0.348521	-0.263199	0.509002	-1.13191	-0.114795	0.754092	-0.400891	0.505722	-0.466492	0.472776	0.728635	0.884697	-0.718028	-0.615118	-0.21857	-0.103425	-0.536805	-2.07273
GSM723487	GSE29272	28.03	0	TMEcluster-A	0.237732	-0.200222	-1.46187	0.842605	-0.0890871	1.50839	-0.263199	0.400128	-1.24263	-0.114795	-0.137941	-0.400891	0.719124	-0.466492	-0.271486	0.716655	-0.0768624	0.353819	2.28737	-1.1107	-0.103425	-0.397439	1.38053
GSM723489	GSE29272	15.4	0	TMEcluster-C	-0.0569715	-0.725675	0.893924	2.27783	-0.0890871	-0.529899	3.66098	0.262293	-0.813102	-0.114795	-0.970136	-0.400891	-0.208887	-0.447485	1.02303	-0.260137	-0.406041	-0.718028	-0.595313	-0.661484	-0.103425	-0.848504	-0.556265
GSM723491	GSE29272	5.37	0	TMEcluster-A	1.87755	-0.54386	-0.321272	-0.238984	-0.0890871	1.99558	-0.263199	1.24525	-0.888815	-0.114795	0.607521	-0.400891	0.980374	-0.400351	1.22683	-0.902406	-0.350556	-0.718028	0.892268	-1.51489	-0.103425	-0.848504	0.759272
GSM723493	GSE29272	35.53	0	TMEcluster-A	-1.43105	0.929125	-0.64536	-1.64169	-0.0890871	0.00221924	-0.263199	-0.827608	0.213426	3.79649	-0.0464386	-0.400891	-1.12039	2.57092	0.256464	0.357815	0.702433	-0.718028	1.09375	-0.268028	-0.103425	-0.848504	1.16302
GSM723495	GSE29272	93	1	TMEcluster-A	-0.114686	-0.972552	-1.39389	-0.502157	-0.0890871	-0.0969594	-0.263199	-0.489907	0.587614	-0.114795	0.901168	-0.400891	0.0117539	-0.466492	-0.222431	1.08451	0.971625	2.07613	1.55431	0.493764	-0.103425	0.000437064	0.026248
GSM723497	GSE29272	85	1	TMEcluster-A	0.286694	-0.0110294	-0.116985	-0.473508	-0.0890871	-0.728633	-0.263199	0.701069	0.102929	-0.114795	1.72865	-0.400891	0.107557	-0.466492	-0.103627	-0.161972	0.388163	-0.718028	0.520281	0.124522	-0.103425	-0.192657	0.28475
GSM723499	GSE29272	44.33	0	TMEcluster-B	-0.36773	0.239293	-0.0741678	-1.27804	-0.0890871	-0.506484	-0.263199	-0.503528	0.830974	-0.114795	0.852308	-0.400891	-0.924054	1.52536	-0.505483	-0.311636	-0.69402	-0.171778	-0.0450945	0.752351	-0.103425	0.152468	0.799984
GSM723501	GSE29272	90.93	1	TMEcluster-C	0.11736	-0.232097	0.140046	1.39964	-0.0890871	-0.844602	-0.220783	0.928548	-0.373518	-0.114795	-1.28187	4.85268	-1.42807	-0.466492	0.953761	-0.504135	-1.00558	-0.274726	-0.615118	-0.318118	-0.103425	0.984101	0.785077
GSM723503	GSE29272	16.33	0	TMEcluster-A	1.19875	-0.972552	-1.27893	-1.09906	-0.0890871	1.68551	-0.263199	0.0623118	-1.32586	-0.114795	0.505127	-0.400891	0.79113	-0.466492	-0.274559	1.81261	0.927247	-0.718028	1.72408	-0.605954	-0.103425	0.566443	0.125495
GSM723505	GSE29272	23.6	0	TMEcluster-A	0.927492	-0.964033	1.25624	-0.324377	-0.0890871	0.854823	2.74489	-1.44096	0.320525	-0.114795	-1.28187	0.213719	0.219622	-0.466492	-0.26521	0.7309	-0.813084	1.07489	-0.308752	-0.270251	-0.103425	-0.848504	0.565701
GSM723507	GSE29272	5.1	0	TMEcluster-A	-0.330818	0.937977	-0.372352	0.526578	-0.0890871	-0.384864	-0.263199	-0.398003	0.64339	-0.114795	-0.0554572	-0.400891	-0.0817744	-0.466492	-0.067429	0.479439	0.359327	0.405422	1.29804	-1.45039	-0.103425	-0.104087	1.03295
GSM723509	GSE29272	6.9	0	TMEcluster-A	-1.43105	3.73772	-0.057126	-1.61735	-0.0890871	1.30502	-0.263199	0.402954	0.35575	-0.114795	-1.28187	3.20608	-0.0890989	-0.466492	-0.551201	-0.365163	-1.3659	1.13694	0.329864	-0.656146	-0.103425	0.161554	1.16911
GSM723511	GSE29272	82.2	1	TMEcluster-C	-0.638199	0.719333	-0.33483	0.640327	-0.0890871	-0.844602	-0.263199	0.532681	1.45658	-0.114795	0.0794194	-0.400891	-0.0559335	-0.162757	0.794325	-1.06487	-0.402733	1.3863	0.937106	-1.08798	-0.103425	0.164724	1.18747
GSM723513	GSE29272	7.17	0	TMEcluster-A	-0.208639	-0.548366	-0.95397	0.470418	-0.0890871	0.377815	-0.263199	-1.52341	1.42783	-0.114795	-0.559446	-0.0450503	-0.0321103	-0.466492	0.00698202	2.05915	-0.698694	-0.0889361	1.97212	-1.10213	-0.103425	-0.333203	0.942218
GSM723515	GSE29272	93.67	1	TMEcluster-C	-0.034165	1.2055	-0.645324	2.7709	11.1359	-0.844602	5.87581	-0.571008	-0.111269	-0.114795	-0.337539	-0.400891	-1.11184	0.176385	0.959431	-1.08301	-0.885572	0.0166193	-0.615118	-0.994584	-0.103425	-0.628041	-0.359392
GSM723517	GSE29272	28.97	0	TMEcluster-A	1.17693	0.0316636	0.0595558	0.0649787	-0.0890871	-0.0339804	-0.263199	-0.545693	-0.181491	-0.114795	0.63322	-0.400891	-0.354816	-0.466492	-1.14292	-1.05468	2.40845	-0.339655	-0.615118	1.20892	-0.103425	-0.489542	0.625134
GSM723521	GSE29272	8	0	TMEcluster-B	1.9687	-0.972552	0.315643	-1.13968	-0.0890871	-0.0585182	-0.263199	0.991189	0.176469	-0.114795	1.47653	-0.400891	-1.42807	0.0888103	0.683156	-1.87012	1.11019	-0.718028	-0.615118	0.778959	-0.103425	0.0586994	-1.33208
GSM723523	GSE29272	9.3	0	TMEcluster-A	-0.814084	1.95206	-0.932065	0.830116	-0.0890871	-0.844602	-0.263199	0.306068	0.916287	-0.114795	-0.8874	-0.160026	-0.280096	-0.466492	0.610883	0.153432	0.345859	-0.718028	1.27836	-1.14958	-0.103425	-0.209986	1.32738
GSM723525	GSE29272	27.37	0	TMEcluster-A	-0.555638	0.0983213	0.48724	-0.0830764	-0.0890871	0.290301	-0.263199	-1.94141	2.64484	-0.114795	-1.28187	2.83964	-0.572894	0.00452632	0.133457	-0.22772	-0.114442	0.000107234	0.919584	-1.51489	-0.103425	0.980999	-0.183723
GSM723527	GSE29272	69.37	1	TMEcluster-B	-0.735548	-0.467308	-1.52641	-1.2011	-0.0890871	1.10898	-0.263199	-1.49211	-0.406139	-0.114795	-0.462109	-0.400891	-1.42807	1.34878	-1.27379	-0.814424	-1.3659	-0.596514	-0.615118	5.32769	-0.103425	2.20036	-0.471591
GSM723529	GSE29272	80.7	1	TMEcluster-C	-0.354816	-0.228145	0.368279	0.20525	-0.0890871	-0.844602	-0.263199	0.725669	-0.264312	-0.114795	0.571851	-0.400891	0.42798	-0.432074	0.66318	0.0970547	1.73034	-0.370161	-0.615118	-0.264318	-0.103425	0.146977	-0.483402
GSM723531	GSE29272	9.6	0	TMEcluster-A	0.376776	0.345046	-0.967234	0.850684	-0.0890871	1.06643	-0.263199	-1.72393	1.17874	-0.114795	0.44413	-0.400891	0.0310398	-0.466492	0.173393	0.513432	-0.28491	-0.520966	0.738729	-0.869093	-0.103425	-0.848504	-1.85946
GSM723533	GSE29272	3.1	0	TMEcluster-A	-0.742926	0.231386	-1.12974	1.76888	-0.0890871	-0.844602	-0.263199	-0.767251	0.138995	-0.114795	0.0615278	-0.400891	-0.680067	-0.466492	-0.244184	1.00018	-0.323792	0.21753	2.15928	-0.596764	-0.103425	-0.575774	1.30632
GSM723535	GSE29272	12.13	0	TMEcluster-C	0.487941	-0.972552	-0.462207	-0.83283	-0.0890871	-0.59434	-0.263199	-0.50684	2.29937	-0.114795	1.57799	-0.400891	0.216892	-0.466492	2.60656	0.349539	0.979031	-0.718028	-0.615118	-0.220392	-0.103425	-0.251579	-0.731398
GSM723537	GSE29272	4	0	TMEcluster-A	0.354539	-0.972552	-1.18106	0.731055	-0.0890871	1.77089	-0.263199	0.213725	0.245172	-0.114795	-0.341817	-0.400891	0.504731	-0.466492	2.21536	-0.0391947	0.0313567	-0.718028	-0.252716	-0.109199	-0.103425	-0.284895	0.836656
GSM723539	GSE29272	35.1	0	TMEcluster-A	0.207571	-0.30376	0.361976	-0.629373	-0.0890871	-0.844602	-0.263199	0.209638	1.29288	-0.114795	0.106142	-0.400891	-0.739737	-0.0222112	-1.55567	0.249113	0.930742	1.39355	1.27909	-0.640544	-0.103425	-0.523425	0.753822
GSM723541	GSE29272	5.63	0	TMEcluster-A	-1.43105	2.65294	-0.423792	0.0316693	-0.0890871	0.535341	-0.263199	-1.45244	1.51317	-0.114795	-1.28187	4.22553	0.874336	-0.466492	0.286582	0.00186046	-0.436328	0.0321569	0.754052	-1.24129	-0.103425	-0.848504	0.936891
GSM723543	GSE29272	8.1	0	TMEcluster-B	-0.313683	-0.642395	-1.50048	0.296059	-0.0890871	0.113871	-0.263199	-0.474859	-0.362887	-0.114795	1.41134	-0.400891	0.628956	-0.466492	1.36087	0.0840237	0.627951	0.395849	-0.615118	1.54475	-0.103425	1.09245	0.4341
GSM723545	GSE29272	61.83	1	TMEcluster-C	-0.375847	-0.972552	-1.16415	0.227379	-0.0890871	-0.376328	0.726828	0.29301	2.18158	-0.114795	-1.28187	3.63049	-1.38106	-0.466492	1.93847	0.88602	0.603437	0.331442	-0.615118	-0.521051	-0.103425	1.71954	-1.47281
GSM723547	GSE29272	4.57	0	TMEcluster-B	-1.43105	3.05045	-1.57292	-1.94708	-0.0890871	1.49659	-0.263199	0.0950463	2.23831	-0.114795	-1.28187	3.19273	-1.42807	-0.466492	-1.85096	-0.7014	-1.3659	5.30969	-0.0209685	-0.015454	-0.103425	4.63639	-0.121108
GSM723549	GSE29272	21.03	0	TMEcluster-B	0.232524	-0.972552	-0.165345	-1.58987	-0.0890871	-0.844602	-0.263199	0.835128	-0.280092	-0.114795	1.11757	-0.400891	-0.752875	-0.466492	3.09684	-0.0400852	-0.0501869	1.55133	-0.615118	1.03624	-0.103425	1.44588	0.781314
GSM723551	GSE29272	10.47	0	TMEcluster-B	-1.43105	2.10922	-0.999326	-1.13412	-0.0890871	-0.191154	-0.263199	0.481117	-0.841298	-0.114795	0.310278	-0.400891	-0.197422	-0.466492	-0.606412	1.23372	0.846112	2.4122	0.126859	0.453186	-0.103425	0.742784	0.975795
GSM723553	GSE29272	62.33	1	TMEcluster-B	0.806641	-0.972552	1.36053	-1.37856	-0.0890871	-0.133027	-0.263199	0.156104	0.850792	-0.114795	0.524886	-0.400891	-0.598491	1.43594	-0.894447	-0.67203	-1.3659	-0.718028	0.347041	-0.283466	-0.103425	-0.814145	-0.0828427
GSM723555	GSE29272	12.63	0	TMEcluster-A	-0.531974	1.02382	-0.0197397	0.785191	-0.0890871	-0.844602	-0.263199	-0.732187	0.802537	-0.114795	-0.316993	-0.400891	-0.592239	-0.153055	0.788825	0.333784	-0.47517	-0.718028	0.828072	-1.00139	-0.103425	-0.635422	0.838459
GSM723557	GSE29272	82.6	1	TMEcluster-A	0.562302	-0.972552	-1.61714	-2.13278	-0.0890871	0.863144	-0.263199	-1.86449	-0.763567	-0.114795	-0.000241678	-0.400891	1.8515	-0.466492	-0.843977	5.24251	-0.199959	-0.718028	3.71921	-0.996285	-0.103425	-0.237324	1.91632
GSM723559	GSE29272	10.83	0	TMEcluster-A	-0.761027	1.3896	-1.53794	1.0935	-0.0890871	-0.66148	-0.263199	0.485911	-1.7613	-0.114795	-1.04509	1.58291	0.730147	-0.466492	-0.354082	0.953331	0.226489	0.990664	1.90207	-0.321736	-0.103425	-0.332902	1.35792
GSM723561	GSE29272	83.4	1	TMEcluster-C	-0.07421	-0.972552	1.04065	0.80839	-0.0890871	-0.844602	3.45901	0.755756	-0.525087	-0.114795	0.00902013	-0.400891	-0.922347	-0.466492	1.32056	-0.2792	-0.289034	-0.718028	-0.615118	0.117451	-0.103425	-0.597444	1.44085
GSM723563	GSE29272	27.63	0	TMEcluster-B	0.323163	-0.280938	0.989249	-0.21435	-0.0890871	0.772248	-0.263199	-0.0430007	-1.07222	-0.114795	0.59125	-0.400891	-0.671294	-0.332159	0.949277	-0.41988	-1.3659	-0.718028	-0.557736	-0.270603	-0.103425	1.70893	0.505119
GSM723565	GSE29272	14.53	0	TMEcluster-A	-1.14741	0.354947	-0.855811	0.820692	-0.0890871	-0.844602	-0.263199	-1.65511	1.42197	-0.114795	0.153975	-0.400891	-0.652283	-0.075376	-0.857235	0.551561	0.0624754	-0.196726	1.27833	-0.177534	-0.103425	2.2331	0.9429
GSM723567	GSE29272	39.7	0	TMEcluster-B	0.453977	-0.972552	-1.16353	-2.37742	-0.0890871	3.73435	-0.263199	-0.713947	2.56739	-0.114795	-0.414938	-0.400891	0.6659	-0.466492	-0.813095	1.03579	-1.3659	2.56218	-0.615118	1.11852	-0.103425	0.326347	-0.290894
GSM723569	GSE29272	8.27	0	TMEcluster-A	0.561381	2.57335	-0.477304	0.4476	-0.0890871	-0.844602	-0.263199	0.992298	-0.686113	-0.114795	-0.488916	-0.400891	-0.0711789	-0.466492	-0.929368	0.612113	-1.3659	0.762198	0.0429884	-0.775962	-0.103425	-0.809236	0.000548323
GSM723571	GSE29272	54.8	1	TMEcluster-C	0.295242	-0.972552	1.1565	-0.024476	-0.0890871	-0.411038	1.43048	0.0337441	0.816275	-0.114795	-0.0352174	-0.400891	-0.760105	-0.150173	1.00517	-0.463855	-0.0668433	-0.13354	-0.615118	-0.620468	1.86063	0.622659	-0.0132651
GSM723573	GSE29272	28.67	0	TMEcluster-B	-0.210164	-0.18111	1.73676	-0.65022	-0.0890871	-0.844602	-0.263199	0.182033	0.414238	-0.114795	0.664058	-0.400891	-0.367701	-0.466492	-1.35551	-1.52414	0.421734	1.50142	-0.615118	1.23255	-0.103425	0.324553	0.557973
GSM723575	GSE29272	62.1	1	TMEcluster-B	-0.826769	0.322586	-0.820637	-1.92999	-0.0890871	-0.407823	-0.263199	0.317978	-1.01124	-0.114795	2.02211	-0.400891	-1.42807	2.23358	-0.928104	0.0726087	-1.3659	-0.377456	-0.615118	1.47201	-0.103425	3.15401	-0.548198
GSM723577	GSE29272	61.53	1	TMEcluster-C	-0.899362	0.284221	-0.684966	1.49699	-0.0890871	-0.844602	2.33214	0.384786	0.791072	-0.114795	-0.773829	-0.400891	-1.42807	-0.0299723	1.8899	-0.427099	1.34565	-0.718028	-0.615118	-0.148931	-0.103425	-0.217288	-1.51862
GSM723579	GSE29272	58.73	0	TMEcluster-B	1.25015	-0.972552	0.594287	-1.50809	-0.0890871	1.46035	-0.263199	-1.25664	0.702309	-0.114795	2.23697	-0.400891	0.0974191	-0.466492	-1.72138	-0.537272	-0.104812	1.54556	-0.590361	1.0438	-0.103425	-0.0954264	1.76572
GSM723581	GSE29272	65.6	1	TMEcluster-A	-0.210902	0.619363	-0.0911776	0.918986	-0.0890871	0.401212	-0.263199	-1.33241	1.89516	-0.114795	-0.50697	-0.400891	-1.21738	-0.466492	-1.15058	-0.811322	0.172645	0.567439	1.1158	-0.695479	-0.103425	0.579544	-1.02477
GSM723583	GSE29272	4.6	0	TMEcluster-A	0.0830688	0.757421	0.689461	0.289469	-0.0890871	-0.844602	-0.263199	0.704889	0.938398	-0.114795	-1.23747	-0.400891	-0.937442	-0.352825	-0.744041	0.115498	0.19712	-0.718028	0.152231	-0.837246	-0.103425	0.103848	-0.162651
GSM723585	GSE29272	12.13	0	TMEcluster-A	0.32459	-0.113427	0.0271342	1.36234	-0.0890871	0.153387	-0.263199	1.21072	-0.360554	-0.114795	-1.28187	0.43333	0.317765	-0.466492	-1.09113	0.0832899	-1.3659	-0.718028	-0.615118	0.213673	-0.103425	0.320782	1.15054
GSM723587	GSE29272	29.73	0	TMEcluster-A	-0.767196	0.14287	-0.900363	-0.461296	-0.0890871	0.0234219	-0.263199	-1.29189	1.02285	-0.114795	0.92625	-0.400891	-0.647168	-0.297847	-1.02118	1.23449	0.325549	-0.0401477	2.11033	-0.211385	-0.103425	0.481309	0.435258
GSM723589	GSE29272	28.27	0	TMEcluster-B	3.00918	-0.972552	1.15512	-1.05774	-0.0890871	0.837787	-0.263199	-0.431716	-0.304914	-0.114795	1.78832	-0.400891	-0.670991	-0.452039	-0.823849	-0.581416	-0.568922	0.170365	-0.615118	-0.137083	-0.103425	-0.848504	-0.234527
GSM723591	GSE29272	67.13	1	TMEcluster-A	0.0214161	-0.972552	0.115287	-0.657679	-0.0890871	0.90562	-0.263199	0.979936	-0.447725	-0.114795	-1.22044	-0.400891	-1.1687	-0.466492	0.73799	0.403018	1.29771	-0.0409151	-0.615118	1.00075	-0.103425	0.307549	-0.501898
GSM723593	GSE29272	48.73	0	TMEcluster-A	0.574845	-0.291147	-0.610125	-0.182795	-0.0890871	-0.782119	-0.263199	-0.600475	0.439143	-0.114795	-1.28187	1.55643	-0.439571	-0.466492	0.299055	0.0456158	-1.04625	2.59128	1.61518	0.0636674	-0.103425	1.68653	1.32865
GSM723595	GSE29272	63.03	1	TMEcluster-C	1.10869	-0.972552	0.923385	0.567083	-0.0890871	-0.844602	-0.263199	-0.646802	1.28818	-0.114795	-0.901804	1.90433	0.317678	-0.421646	0.894028	0.136056	0.0107237	-0.0464386	-0.307388	-1.31442	-0.103425	-0.368481	0.515031
GSM723597	GSE29272	11.67	0	TMEcluster-B	-0.607821	2.14817	0.623932	-0.525292	-0.0890871	0.411214	-0.263199	0.0659121	0.12212	-0.114795	1.15863	-0.400891	0.748145	-0.466492	-1.08987	-1.76779	1.09027	-0.718028	-0.615118	0.606916	-0.103425	-0.848504	0.589881
GSM723599	GSE29272	3.17	0	TMEcluster-B	0.574293	0.264344	1.32975	-0.240645	-0.0890871	-0.577976	-0.263199	-0.695271	-0.225572	-0.114795	0.739364	-0.400891	-0.883933	-0.466492	-0.375827	-0.548491	0.610212	-0.27037	-0.615118	0.377508	-0.103425	-0.414769	-0.666799
GSM723601	GSE29272	11.9	0	TMEcluster-A	-0.48658	0.0136479	-0.544045	0.241535	-0.0890871	-0.743733	-0.263199	-0.438039	0.692596	-0.114795	0.955774	-0.400891	0.988622	-0.466492	-0.143337	0.359515	-0.337238	-0.180016	1.92763	-0.673073	-0.103425	0.525547	-0.085035
GSM723603	GSE29272	67.73	1	TMEcluster-C	-0.0650487	-0.972552	0.9853	-0.370978	-0.0890871	-0.132153	-0.263199	-0.0879072	-0.247773	-0.114795	0.737572	0.498237	-0.481476	-0.466492	2.05591	0.706801	-0.787823	0.760747	-0.615118	-0.885392	-0.103425	0.484329	0.870686
GSM723605	GSE29272	72.73	1	TMEcluster-A	-0.644813	-0.440269	-1.44148	-0.947239	-0.0890871	2.96311	-0.263199	-1.35793	-0.820629	-0.114795	-0.401639	-0.400891	1.61062	-0.466492	-0.894638	1.86009	0.169519	-0.245536	3.56737	-0.732836	-0.103425	0.684252	1.4789
GSM723607	GSE29272	5.77	0	TMEcluster-A	-0.191449	-0.345499	-1.34674	0.60762	-0.0890871	2.27164	-0.263199	-0.775155	-0.715245	-0.114795	-0.392255	-0.333854	0.587325	-0.466492	-0.360611	1.03967	1.08718	-0.718028	0.862445	0.0430362	-0.103425	-0.425881	1.60541
GSM723609	GSE29272	5.73	0	TMEcluster-C	-0.630845	-0.531173	0.369545	1.57425	-0.0890871	0.286866	0.262236	-0.371816	1.65623	-0.114795	-0.792885	-0.400891	1.24512	-0.466492	0.581888	-0.853149	0.138269	-0.718028	-0.383886	-0.305027	-0.103425	-0.814145	0.43556
GSM723611	GSE29272	25.5	0	TMEcluster-C	-0.184228	-0.856744	1.59573	-0.0594851	-0.0890871	-0.844602	-0.263199	1.45252	0.860392	-0.114795	-1.28187	-0.0199522	-0.577958	0.191341	0.905267	-0.435724	-0.164393	-0.718028	-0.615118	-0.515598	-0.103425	-0.488217	0.575705
GSM723613	GSE29272	2.6	0	TMEcluster-A	-0.220599	-0.711454	-1.38206	1.1554	-0.0890871	1.0968	-0.263199	0.747386	1.23258	-0.114795	-0.868272	-0.400891	-0.000892525	-0.466492	-0.227918	0.803663	1.5285	0.382544	-0.255508	-0.423235	-0.103425	-0.575481	0.653266
GSM723615	GSE29272	17.37	0	TMEcluster-B	-1.43105	1.81092	-0.651591	0.55115	-0.0890871	0.294879	-0.263199	-1.4383	-0.596463	-0.114795	1.6058	-0.400891	1.9379	1.13435	-0.945892	-2.03412	3.13693	-0.718028	-0.615118	0.797108	-0.103425	-0.848504	-1.27951
GSM723617	GSE29272	35.6	0	TMEcluster-A	-0.183372	0.15937	0.420688	-0.589298	-0.0890871	0.955219	-0.263199	0.292193	-0.661675	-0.114795	-1.28187	0.92807	0.912722	-0.466492	-0.592459	2.08299	-0.535471	-0.418528	-0.615118	-0.350788	-0.103425	-0.394947	0.0831833
GSM723619	GSE29272	5.27	0	TMEcluster-B	-1.43105	1.69919	-0.59513	0.596792	-0.0890871	-0.844602	-0.263199	0.0378806	-0.269406	-0.114795	1.02855	-0.400891	-1.42807	0.209219	-0.76956	-0.520968	2.2922	-0.718028	-0.615118	0.882038	-0.103425	-0.191682	-0.962641
GSM723625	GSE29272	13.27	0	TMEcluster-A	-0.790902	0.689622	1.20474	-0.0924445	-0.0890871	-0.46091	-0.263199	-0.275888	-0.290978	-0.114795	0.528623	-0.400891	1.31615	-0.257142	-0.563395	-0.616905	1.20851	-0.718028	-0.615118	0.412391	-0.103425	-0.848504	-0.847584
GSM723627	GSE29272	29.83	0	TMEcluster-B	-0.971885	-0.423712	2.31486	-0.481679	-0.0890871	-0.658983	-0.263199	0.541851	-0.139127	-0.114795	1.03244	-0.400891	0.283441	0.0506137	-1.30655	-0.97237	-0.65821	0.139965	-0.615118	0.764533	-0.103425	-0.677855	-0.807627
GSM723629	GSE29272	8.57	0	TMEcluster-C	0.473281	-0.972552	2.71447	-0.0151979	-0.0890871	-0.844602	-0.263199	1.54265	-1.50646	-0.114795	-0.260263	-0.400891	0.566796	-0.437718	-0.804105	-1.30362	-0.381803	1.07041	-0.615118	0.299478	-0.103425	-0.469849	-0.899402
GSM723631	GSE29272	79.73	1	TMEcluster-C	2.01753	1.18139	-0.546338	1.08889	-0.0890871	-0.844602	-0.263199	1.17342	-0.559227	-0.114795	-0.994769	-0.28113	-0.282672	0.841456	0.600101	-1.18255	-1.3659	-0.444559	-0.615118	-0.756496	-0.103425	-0.848504	-1.29184
GSM723633	GSE29272	8.43	0	TMEcluster-C	-0.213348	-0.972552	2.14268	-0.00788925	-0.0890871	-0.844602	-0.263199	-0.13949	-0.574852	-0.114795	-0.39284	-0.400891	-0.842609	0.866627	0.00558602	0.702502	-1.1691	-0.505477	-0.615118	-0.661359	-0.103425	-0.569845	-0.19569
GSM723635	GSE29272	57.2	0	TMEcluster-B	0.723066	-0.545957	0.78158	-0.535007	-0.0890871	-0.525259	-0.263199	0.179334	-0.737521	-0.114795	0.383989	-0.400891	-0.514514	2.2959	-0.7968	-1.05384	-0.896857	-0.718028	-0.615118	0.523055	-0.103425	-0.848504	-0.269497
GSM723637	GSE29272	20.27	0	TMEcluster-B	0.0624965	-0.972552	0.316944	-0.888151	-0.0890871	0.669516	-0.263199	-1.00983	-0.0607148	-0.114795	1.52415	-0.400891	-1.28112	0.804452	-1.05845	-1.10288	0.411144	1.39499	-0.615118	0.815066	-0.103425	2.74502	-1.06114
GSM723639	GSE29272	4.53	0	TMEcluster-B	-1.43105	0.958329	-1.34773	-1.08345	-0.0890871	0.1026	-0.263199	-1.5071	-0.188445	-0.114795	2.05327	-0.400891	-0.867192	4.43752	-0.60769	-0.507858	-1.3659	-0.718028	-0.615118	0.973296	-0.103425	-0.848504	-1.39198
GSM723641	GSE29272	5.57	0	TMEcluster-C	0.747319	-0.972552	1.11185	0.0427605	-0.0890871	-0.844602	-0.263199	0.0762068	0.164561	-0.114795	0.516448	-0.400891	1.2967	-0.466492	1.17324	-0.331613	0.718907	-0.718028	-0.615118	-0.262557	-0.103425	-0.848504	0.334011
GSM723643	GSE29272	18.57	0	TMEcluster-C	-1.43105	2.08866	-0.661955	0.0529524	-0.0890871	-0.844602	-0.263199	1.63544	-1.01212	-0.114795	-1.2104	1.22697	0.374232	-0.466492	-0.336617	0.421451	1.26234	-0.718028	-0.615118	1.32337	-0.103425	-0.848504	-1.3087
GSM723645	GSE29272	6.87	0	TMEcluster-C	-1.36802	0.241756	1.18357	1.11192	-0.0890871	-0.844602	-0.263199	1.31225	0.0809479	-0.114795	-1.28187	-0.400891	0.389418	-0.39089	0.947926	-0.298138	1.40724	-0.718028	-0.266693	-1.07539	-0.103425	-0.848504	-0.715074
GSM723647	GSE29272	25.87	0	TMEcluster-A	-0.620557	0.737502	1.97299	-0.0400747	-0.0890871	-0.844602	-0.263199	1.29199	0.0490325	-0.114795	-0.853536	-0.400891	-0.373096	-0.466492	-0.991648	-0.807317	-0.139378	1.05901	0.542316	-1.10671	-0.103425	-0.109942	-0.306531
GSM723649	GSE29272	12.6	0	TMEcluster-A	-0.748393	-0.24633	-0.780242	0.682674	-0.0890871	0.398526	-0.263199	0.379309	-0.867192	-0.114795	-1.15053	0.0645916	1.18767	-0.466492	-0.617132	1.53108	-0.710744	-0.338129	1.41126	0.235981	-0.103425	-0.55001	-0.116543
GSM723653	GSE29272	12.13	0	TMEcluster-B	-0.147699	-0.314341	1.52513	-0.606815	-0.0890871	-0.844602	-0.263199	-0.6142	0.284428	-0.114795	0.974951	-0.400891	0.511556	-0.186817	-0.313647	-0.877449	0.790826	-0.620873	-0.615118	1.13751	-0.103425	-0.848504	0.228549
GSM723655	GSE29272	25.9	0	TMEcluster-B	-1.43105	0.586501	-0.374806	1.39978	-0.0890871	-0.652244	-0.263199	-1.75251	0.968587	-0.114795	0.877887	-0.400891	0.310232	-0.323379	-0.592709	0.688393	0.673187	0.286778	-0.615118	0.143486	-0.103425	0.0257818	0.193024
GSM723657	GSE29272	67.83	1	TMEcluster-B	-1.42853	-0.329898	0.898845	-0.167003	-0.0890871	-0.844602	0.724318	1.00467	-1.53997	-0.114795	0.527245	-0.400891	-1.16902	-0.466492	0.761143	-0.942949	0.607257	-0.571742	-0.615118	1.53889	10.9641	2.27237	-0.303682
GSM723659	GSE29272	2.53	0	TMEcluster-B	-0.131978	-0.972552	0.88401	-0.76165	-0.0890871	-0.32365	-0.263199	0.739065	-0.229916	-0.114795	0.623961	-0.400891	-1.29108	1.35602	0.105843	-0.210073	0.175202	-0.718028	-0.615118	-0.195623	-0.103425	0.314142	-0.0433432
GSM723661	GSE29272	68.87	1	TMEcluster-B	-1.0144	-0.263369	0.00411604	-1.11071	-0.0890871	1.30517	6.21327	-0.874118	-0.0837798	-0.114795	2.12088	-0.400891	-0.424359	0.755953	-1.05172	-0.0286747	0.0435793	0.00850165	-0.615118	0.896431	-0.103425	-0.737216	-1.34193
GSM723663	GSE29272	91.2	1	TMEcluster-B	-0.123492	-0.972552	0.909954	-0.538934	-0.0890871	-0.341431	-0.263199	-0.806292	-1.30201	-0.114795	0.639196	2.1961	-1.42807	0.325496	1.92473	-0.668027	-1.3659	-0.718028	-0.615118	1.49514	-0.103425	0.753664	-0.201086
GSM723665	GSE29272	45.43	0	TMEcluster-B	-1.43105	0.631255	-0.128679	1.17088	-0.0890871	-0.844602	-0.263199	-1.51411	1.02895	-0.114795	-0.146259	-0.400891	-0.0253119	1.11013	-0.624342	-0.292032	0.157372	-0.619715	-0.615118	0.257671	-0.103425	0.47089	-0.663081
GSM723667	GSE29272	55.43	0	TMEcluster-B	-0.389223	-0.10005	-0.329419	-1.83426	-0.0890871	-0.407881	-0.263199	-0.599764	-0.77351	-0.114795	-0.0447517	-0.400891	-1.42807	0.840251	0.483521	-1.1978	-0.22117	0.08651	-0.615118	3.9042	-0.103425	2.14995	-0.161627
GSM723671	GSE29272	40.13	0	TMEcluster-C	0.507212	1.40099	0.144756	0.393937	-0.0890871	-0.844602	-0.263199	2.23564	-0.526768	-0.114795	-1.24126	0.110374	-0.179058	-0.391872	-0.391513	-0.248365	-0.326219	0.881478	-0.245404	-0.828168	-0.103425	-0.463017	0.49341
GSM723673	GSE29272	18.63	0	TMEcluster-C	0.386873	1.40096	-0.963339	0.887315	-0.0890871	-0.844602	-0.263199	2.53564	-2.1716	10.438	-1.28187	-0.400891	-0.361514	0.432686	0.446435	0.448403	-1.3659	-0.718028	-0.615118	-0.0330215	-0.103425	-0.848504	-0.0432243
GSM723675	GSE29272	44.27	0	TMEcluster-B	-0.00625595	-0.664454	0.177784	0.716114	-0.0890871	0.376287	-0.263199	-1.45173	1.08699	-0.114795	0.920538	-0.400891	1.33822	-0.466492	-0.92142	-0.152638	-0.402956	0.214996	-0.615118	0.833834	-0.103425	-0.848504	-0.130523
GSM723677	GSE29272	76.97	1	TMEcluster-C	0.307464	-0.972552	1.01409	2.11364	-0.0890871	-0.844602	1.2053	0.702649	-0.905635	-0.114795	-1.08283	-0.400891	-0.376843	-0.277558	2.03793	-1.28274	-0.418212	-0.718028	-0.615118	-0.0880112	-0.103425	-0.848504	-0.987417
GSM723679	GSE29272	7.17	0	TMEcluster-C	1.26637	0.499847	-0.863817	2.90454	-0.0890871	-0.844602	-0.263199	0.757373	0.210671	-0.114795	-1.28187	0.157949	0.651221	-0.112181	-0.00807968	-0.77941	-1.3659	-0.694596	-0.615118	-0.54374	-0.103425	-0.848504	-0.631859
GSM723681	GSE29272	5.97	0	TMEcluster-C	1.16107	-0.554161	1.31973	0.0175002	-0.0890871	-0.844602	-0.263199	2.21019	-0.119769	-0.114795	-0.719006	-0.272014	-0.194331	-0.354587	0.273658	-0.619962	-0.306268	-0.718028	-0.615118	-0.69081	-0.103425	-0.0427652	-0.0640125
GSM723683	GSE29272	12.53	0	TMEcluster-A	0.988748	0.620992	0.443572	0.464272	-0.0890871	-0.844602	-0.263199	0.944659	-1.06935	-0.114795	-0.0805114	-0.400891	-0.127615	0.183977	-1.21572	0.452456	-1.3659	-0.248883	-0.615118	-0.287522	-0.103425	-0.559013	-0.129885
GSM723685	GSE29272	17.5	0	TMEcluster-B	1.20354	-0.972552	0.548052	-1.15305	-0.0890871	1.13076	-0.263199	1.88865	-1.2756	-0.114795	1.5014	-0.400891	0.923325	-0.119434	-1.48942	-0.718617	-0.329955	1.1723	-0.615118	-0.415329	-0.103425	2.30288	0.124658
GSM723687	GSE29272	13.9	0	TMEcluster-C	2.54804	1.13847	-1.0386	0.379893	-0.0890871	-0.844602	1.04927	0.930736	0.466585	-0.114795	-0.829846	-0.400891	-1.11541	1.20305	0.176138	-0.669745	-1.3659	-0.109932	-0.615118	-0.923258	-0.103425	-0.848504	0.0672966
GSM723689	GSE29272	12.4	0	TMEcluster-A	-0.127617	0.582115	1.12852	-0.424216	-0.0890871	1.38915	-0.263199	-1.13192	-0.472131	-0.114795	0.630128	-0.400891	0.920307	-0.466492	-0.192062	-0.793825	1.32005	-0.0517357	-0.615118	-0.322951	-0.103425	-0.331087	-0.677013
GSM723691	GSE29272	58.07	1	TMEcluster-A	1.3967	-0.972552	1.08959	-0.00934031	-0.0890871	0.303931	-0.263199	0.152523	-1.44326	-0.114795	0.57891	-0.400891	0.991611	-0.229809	0.380887	-0.332285	-0.678568	-0.718028	-0.615118	0.159791	-0.103425	-0.848504	-0.372986
GSM723693	GSE29272	21.57	0	TMEcluster-B	0.38077	-0.972552	-1.40418	-1.68263	-0.0890871	0.87151	-0.263199	1.30525	0.77741	-0.114795	2.48165	-0.400891	1.63423	-0.365386	0.89308	0.120379	1.54555	0.572157	-0.615118	0.621258	-0.103425	-0.269009	0.174843
GSM723695	GSE29272	7.53	0	TMEcluster-C	0.17614	-0.381618	1.27227	-0.464613	-0.0890871	0.00296572	-0.263199	1.41561	0.0157511	-0.114795	-0.338561	-0.400891	-0.62765	0.644322	1.54106	-1.1919	-0.942404	1.33865	-0.615118	-0.890857	-0.103425	-0.848504	-0.464895
GSM723697	GSE29272	22.23	0	TMEcluster-B	-1.43105	-0.133749	-1.02844	-0.523997	-0.0890871	-0.844602	-0.263199	-0.606021	-1.28698	-0.114795	-0.873628	0.961181	-0.168716	7.09599	-0.722298	0.202583	-1.3659	-0.718028	-0.615118	-0.667151	-0.103425	-0.566377	0.262558
GSM723699	GSE29272	10.2	0	TMEcluster-A	0.261401	-0.416149	0.700616	-0.50106	-0.0890871	2.95217	-0.263199	-0.806541	-0.584998	-0.114795	-0.0897554	-0.400891	1.32973	-0.245265	-0.55423	-1.06145	1.45642	-0.718028	-0.615118	0.482285	-0.103425	-0.848504	-1.08118
GSM723703	GSE29272	29.07	0	TMEcluster-A	-0.0641844	-0.229751	0.0762154	0.0192592	-0.0890871	-0.844602	-0.263199	0.489124	-0.605823	-0.114795	0.382666	-0.400891	0.580818	-0.466492	0.315804	1.70699	0.285616	-0.718028	-0.615118	-0.0168739	-0.103425	-0.457983	0.179701
GSM723705	GSE29272	13.2	0	TMEcluster-C	-1.34879	0.186504	-0.0732856	0.428321	-0.0890871	-0.132514	-0.263199	0.593427	-0.965147	-0.114795	-1.28187	1.54664	-0.23476	1.04295	1.53157	0.330253	-1.3659	-0.718028	-0.615118	0.414817	-0.103425	-0.745978	-1.12425
GSM723707	GSE29272	74.23	1	TMEcluster-A	2.69178	-0.655897	0.180534	-0.344415	-0.0890871	-0.376041	-0.263199	0.195537	-0.671677	-0.114795	-0.712474	-0.400891	0.865572	1.54407	-0.716809	-0.0775072	-1.3659	-0.127343	-0.615118	-0.323596	-0.103425	-0.762193	-0.64638
GSM723709	GSE29272	3.23	0	TMEcluster-C	0.190788	-0.972552	2.06763	0.174359	-0.0890871	-0.844602	-0.263199	-0.425758	-1.55593	-0.114795	-0.559519	-0.400891	0.796813	-0.336139	0.323833	0.215601	1.19363	-0.718028	-0.615118	0.246309	-0.103425	-0.638923	-2.07433
GSM723711	GSE29272	5.67	0	TMEcluster-A	0.259656	-0.716114	1.20656	0.482601	-0.0890871	0.829162	-0.263199	-0.777065	0.066479	-0.114795	1.35357	-0.400891	1.23835	-0.466492	-0.554544	-0.948339	-0.0427644	-0.718028	-0.615118	0.0175052	-0.103425	-0.848504	-0.76743
GSM723713	GSE29272	27.87	0	TMEcluster-C	-1.43105	0.847545	-0.358841	0.603655	-0.0890871	-0.844602	-0.263199	-0.297443	1.48112	-0.114795	-0.912211	-0.400891	1.15363	-0.167671	0.37038	0.127421	0.806306	-0.718028	-0.615118	0.31725	-0.103425	0.520821	-0.254675
GSM723717	GSE29272	32.57	0	TMEcluster-C	0.433336	-0.0132146	0.662717	0.801968	-0.0890871	-0.844602	-0.263199	-0.164501	-0.843524	-0.114795	0.810625	-0.400891	0.874485	-0.0672929	0.740856	-0.752109	1.04599	-0.718028	-0.615118	-0.292005	-0.103425	-0.848504	-3.0014
GSM723719	GSE29272	69.73	1	TMEcluster-C	2.59027	-0.0756238	0.585818	-0.293649	-0.0890871	-0.844602	-0.263199	1.32252	-0.635946	-0.114795	-1.11001	0.342	-0.54468	-0.466492	0.256013	-0.488429	-1.05773	-0.718028	-0.615118	-0.225909	-0.103425	1.48826	-1.53062
GSM723721	GSE29272	4.47	0	TMEcluster-A	0.0321783	-0.972552	-0.719193	-1.18278	-0.0890871	2.27747	-0.263199	-1.55268	1.65148	-0.114795	1.75877	-0.400891	0.249356	-0.427408	-0.89632	0.243954	-1.3659	2.87459	2.02363	-0.289131	-0.103425	-0.538661	0.890635
GSM723723	GSE29272	72.9	1	TMEcluster-A	-1.29192	1.32084	-0.524849	-0.135755	-0.0890871	2.35851	-0.263199	-1.11154	-0.938413	-0.114795	0.602163	-0.400891	1.66986	-0.466492	0.374777	0.192392	0.93093	-0.718028	-0.167994	0.0373965	-0.103425	-0.596315	0.277938
GSM723725	GSE29272	49.33	0	TMEcluster-C	0.290495	-0.777277	-1.24158	1.75713	-0.0890871	-0.844602	-0.263199	1.78703	0.799644	-0.114795	-0.197048	-0.400891	0.353769	-0.466492	-0.523266	-0.572049	2.23454	1.98888	-0.615118	-0.0444072	-0.103425	-0.153448	-2.08542
GSM723727	GSE29272	61.1	1	TMEcluster-B	-1.43105	0.652632	0.156907	0.311976	-0.0890871	-0.841884	-0.263199	-0.67699	1.46729	-0.114795	0.597066	-0.400891	-0.395378	1.30293	-0.63543	-0.785695	0.160858	1.64853	-0.615118	-0.232046	-0.103425	-0.261928	0.126015
GSM723731	GSE29272	34.43	1	TMEcluster-B	0.94661	0.258218	0.549278	-0.330367	-0.0890871	-0.844602	-0.263199	0.17708	-1.38429	-0.114795	-0.968843	-0.207262	-0.403523	-0.466492	-1.38687	-0.700966	-0.762896	0.571238	-0.615118	2.72963	-0.103425	0.761399	0.769248
GSM858082	GSE34942	7.5	1	TMEcluster-C	-0.332016	-0.747459	0.223027	2.285	-0.260136	-1.48587	2.04412	0.208786	-0.369559	1.15912	-0.483374	-0.239895	-0.29678	0.483848	0.902912	-0.580071	-0.580694	-0.504685	-0.878268	-0.477774	-0.636738	-0.47313	-0.261832
GSM858083	GSE34942	128.57	0	TMEcluster-B	-0.353699	2.03224	-0.882129	-0.127806	-0.260136	-1.62682	2.89904	0.318927	1.27534	-0.763594	1.44951	-1.21972	-0.29678	0.733815	0.127557	-0.955783	-0.00253424	0.168892	-0.889725	1.78878	-0.636738	1.47196	-0.747644
GSM858084	GSE34942	13.27	1	TMEcluster-A	3.16676	-0.85549	1.1115	-0.85693	-0.260136	0.213992	-0.599734	-1.02623	-0.369559	-0.763594	-0.483374	0.557566	-0.253256	-0.287075	-0.964389	-0.485069	0.000364866	0.428212	0.256165	-0.533591	2.38186	-0.302919	-0.462545
GSM858085	GSE34942	96.33	0	TMEcluster-C	-0.353699	-0.728936	-0.485786	0.276956	-0.260136	-0.595559	1.48563	0.71853	-0.369559	-0.763594	1.28535	-0.852254	-0.29678	1.52833	3.43524	-0.827308	-0.809091	-0.504685	-0.159252	-0.533591	-0.636738	-0.248322	-0.325862
GSM858086	GSE34942	3.7	1	TMEcluster-B	-0.353699	2.00884	-0.766525	-0.85693	-0.260136	0.501822	-0.767312	-1.02623	2.3556	-0.763594	2.48989	-0.850933	-0.29678	1.89163	-0.788105	-0.194599	0.361937	-0.504685	-0.889725	0.461434	-0.636738	-0.2168	0.406578
GSM858087	GSE34942	21.27	0	TMEcluster-A	0.0874742	-0.85549	1.75872	-0.0567626	-0.260136	-0.0914477	-0.679525	-0.641323	-0.369559	0.0505115	-0.483374	-0.869882	-0.29678	-0.331224	-0.574228	-0.57493	-0.369379	-0.504685	-0.889725	0.3497	0.366248	-0.152324	0.628344
GSM858088	GSE34942	47.23	0	TMEcluster-C	1.11634	-0.85549	-0.0534484	1.30902	-0.260136	-0.168879	1.07319	0.705581	-0.369559	-0.434263	-0.483374	-0.820414	-0.29678	0.0588565	2.72408	-1.00003	0.554262	-0.504685	-0.190081	-0.533591	0.529277	-0.618609	0.572837
GSM858089	GSE34942	12.23	0	TMEcluster-A	-0.353699	-0.85549	-1.21092	-0.85693	-0.260136	1.30598	-0.767312	-0.711099	0.0763863	0.284389	-0.483374	0.436431	6.40472	-0.925036	-0.380709	2.35657	-0.532685	-0.146174	2.76269	-0.533591	-0.636738	-0.768603	1.53238
GSM858090	GSE34942	19.43	1	TMEcluster-A	-0.353699	0.418572	-0.997651	0.936756	-0.260136	0.506236	-0.767312	0.930911	-0.369559	-0.255412	-0.483374	0.985149	0.355512	-0.925036	0.939748	1.11772	1.07777	-0.346903	1.40505	-0.533591	-0.636738	-0.480113	0.978061
GSM858091	GSE34942	16.6	1	TMEcluster-C	0.0243352	-0.85549	1.22057	-0.324131	-0.260136	-1.55124	0.375659	0.164082	-0.369559	3.91525	-0.483374	-1.21972	1.06254	-0.925036	-0.420364	-0.584203	-0.809091	-0.504685	-0.889725	-0.223175	-0.636738	2.08916	1.35846
GSM858092	GSE34942	4.67	0	TMEcluster-B	-0.353699	-0.85549	0.188606	-0.825546	-0.260136	1.20137	0.159894	0.832781	-0.369559	-0.676446	1.19707	-1.21972	0.552444	0.406613	0.424096	-0.340568	0.0949429	-0.441838	-0.889725	0.180095	-0.34732	-0.0898965	0.207088
GSM858093	GSE34942	38.8	1	TMEcluster-C	-0.353699	1.4276	0.0598505	0.228547	-0.260136	-0.0814083	0.138609	1.4756	-0.369559	1.23867	-0.483374	0.839857	-0.29678	-0.273423	0.374862	-1.06341	-0.809091	-0.125034	-0.09415	-0.533591	-0.355226	-0.141759	-1.34518
GSM858094	GSE34942	16.23	1	TMEcluster-C	-0.353699	2.48875	-0.0496589	0.603898	1.4609	-1.62682	-0.596152	-0.672978	0.507025	1.71678	-0.483374	1.07671	-0.29678	-0.908403	1.09516	-0.0570762	0.144802	-0.106354	0.861324	-0.533591	-0.636738	-0.804389	-0.165073
GSM858095	GSE34942	112.5	0	TMEcluster-B	-0.353699	-0.802245	-1.14648	-0.626694	-0.260136	1.16401	1.59854	0.713767	-0.369559	-0.763594	2.80381	-0.928535	-0.29678	0.923101	0.410875	-0.413514	0.261556	-0.326311	-0.889725	0.0731478	3.43017	0.456101	-1.34494
GSM858096	GSE34942	103.6	0	TMEcluster-A	-0.353699	-0.85549	1.73142	-0.168234	-0.260136	-1.30694	-0.767312	0.287378	-0.369559	0.636997	-0.483374	1.24327	-0.29678	-0.925036	-0.504283	0.0200714	-0.809091	-0.504685	1.28336	-0.533591	0.0300975	0.11444	1.01205
GSM858097	GSE34942	96.4	0	TMEcluster-C	-0.353699	-0.504871	-0.648299	0.516539	-0.260136	-0.722419	0.421102	0.557015	-0.369559	-0.763594	-0.483374	1.99862	-0.29678	1.63719	1.76183	-0.256731	0.945984	-0.48702	-0.683058	-0.533591	-0.636738	0.467545	-0.32632
GSM858098	GSE34942	25.17	1	TMEcluster-B	-0.353699	0.259189	-0.884985	-0.85693	0.969003	1.42127	-0.767312	-1.02623	-0.369559	-0.763594	3.18252	-1.21972	-0.29678	2.7006	-0.684384	-0.357556	-0.647975	-0.504685	-0.889725	0.608288	-0.636738	-0.799031	-0.616157
GSM858099	GSE34942	93.7	0	TMEcluster-B	-0.353699	-0.85549	-1.33865	-0.652982	-0.260136	2.06449	1.78231	-1.02623	-0.369559	-0.763594	-0.483374	1.25698	0.166861	1.46796	-1.02968	-0.218782	-0.809091	0.373049	-0.889725	1.77726	-0.636738	-0.482307	-0.943834
GSM858100	GSE34942	23.77	1	TMEcluster-A	-0.353699	0.358436	-1.02159	-0.85693	-0.260136	0.0187974	-0.767312	-0.490418	-0.369559	0.073331	-0.483374	-0.228926	-0.29678	-0.925036	0.141536	3.20991	3.97685	-0.504685	0.703672	-0.533591	0.956917	-0.645129	0.788252
GSM858101	GSE34942	16.4	1	TMEcluster-B	-0.353699	1.23226	0.0240535	-0.85693	0.286176	-0.392676	0.91234	-0.122282	-0.369559	-0.763594	2.07751	-1.21972	-0.29678	0.75131	-0.0511581	-0.77337	-0.325689	0.0176745	-0.889725	1.63925	-0.189434	-0.804389	-0.130383
GSM858102	GSE34942	15.67	0	TMEcluster-B	-0.353699	-0.724627	-1.27958	0.459752	-0.260136	-0.649508	-0.767312	1.80255	-0.369559	0.406646	-0.483374	1.14635	-0.29678	0.205686	-0.915306	0.892899	1.43042	0.77825	-0.889725	0.202107	-0.636738	3.73409	-0.831221
GSM858103	GSE34942	25.1	1	TMEcluster-B	-0.353699	0.416144	-1.16018	-0.85693	-0.260136	-0.240145	-0.767312	-0.0231237	5.23912	-0.763594	-0.483374	0.897108	-0.29678	2.93312	-0.462735	0.370618	-0.00462127	-0.504685	-0.889725	0.865041	-0.636738	-0.804389	-3.32056
GSM858104	GSE34942	18.67	0	TMEcluster-A	-0.353699	0.952467	-1.11146	0.527564	-0.260136	0.316021	-0.767312	-0.413337	0.958275	-0.481149	-0.483374	0.995459	-0.29678	-0.925036	-0.817184	2.44193	1.28618	-0.200672	1.74752	-0.533591	-0.636738	-0.418123	1.27473
GSM858105	GSE34942	15.43	1	TMEcluster-C	-0.353699	-0.85549	0.325864	1.39045	-0.260136	-1.54677	2.82038	0.294404	-0.369559	1.04759	-0.483374	-1.21972	-0.29678	-0.209547	0.403977	-0.181839	2.65536	-0.103062	-0.0646717	-0.533591	-0.636738	-0.527558	-0.126933
GSM858106	GSE34942	15.37	1	TMEcluster-C	-0.353699	1.71683	0.269222	-0.85693	-0.260136	-0.734332	-0.455459	1.10298	-0.369559	1.12746	-0.483374	1.24924	-0.29678	-0.707703	1.69865	-0.602566	-0.809091	-0.504685	-0.17521	-0.533591	0.893362	0.34111	1.23966
GSM858107	GSE34942	15.7	1	TMEcluster-B	-0.353699	2.2829	-0.089855	-0.637075	3.95645	-0.41471	0.196187	-1.02623	0.528578	0.42139	-0.483374	-1.21972	-0.29678	-0.808382	-0.640294	-0.503184	-0.347977	0.171924	-0.889725	-0.273954	3.64986	2.10876	0.750385
GSM858108	GSE34942	12.3	1	TMEcluster-B	-0.353699	0.354895	-1.03932	-0.85693	-0.260136	0.274496	-0.767312	1.08595	-0.369559	-0.763594	-0.483374	1.07242	-0.29678	0.751247	-0.344117	-1.15336	-0.809091	0.380128	-0.889725	4.36839	-0.636738	0.881703	-1.18316
GSM858109	GSE34942	22.23	1	TMEcluster-B	-0.353699	0.967312	-1.08748	-0.85693	-0.260136	0.323707	-0.377481	-0.233332	-0.369559	-0.763594	0.120652	0.683901	-0.253256	0.23172	-0.891196	-0.700973	-0.636379	0.94812	-0.889725	2.67905	-0.636738	3.44325	-0.711128
GSM858110	GSE34942	27.1	0	TMEcluster-C	0.0903205	-0.243972	1.17367	1.09368	-0.260136	0.448323	-0.0222998	2.21598	-0.369559	-0.415987	-0.483374	-0.542645	-0.253256	-0.925036	-0.762096	-0.801377	-0.809091	-0.504685	-0.509925	-0.119147	0.612329	-0.804389	-0.441801
GSM858111	GSE34942	80.3	1	TMEcluster-C	0.379188	-0.85549	0.722387	-0.352123	0.642618	-0.748227	1.07314	-0.6876	-0.369559	0.101456	-0.483374	0.916651	-0.29678	-0.171926	0.462798	-0.26107	0.00913583	0.230886	0.925585	-0.533591	-0.636738	-0.357337	0.151804
GSM858112	GSE34942	72.6	0	TMEcluster-C	-0.353699	-0.836562	-0.590965	2.08107	-0.260136	-1.62682	0.0225035	1.71923	2.85439	-0.763594	-0.483374	1.49746	-0.29678	0.139253	1.05502	-0.33068	-0.809091	3.57815	-0.406365	-0.533591	-0.636738	0.0868263	-0.460873
GSM858113	GSE34942	9.7	1	TMEcluster-A	0.513593	0.739087	0.959109	-0.309988	-0.260136	0.78622	-0.767312	-0.907706	-0.369559	-0.0389534	-0.483374	0.707522	-0.29678	-0.910885	-0.21992	-0.800715	0.0831388	-0.289355	1.00808	-0.533591	0.897131	-0.804389	-0.447811
GSM858114	GSE34942	41.93	0	TMEcluster-A	5.48674	0.758117	-0.0653372	0.269943	5.69165	-0.856642	-0.767312	-0.974441	-0.369559	0.0507136	-0.483374	-0.337912	-0.29678	-0.707899	-0.867596	0.216924	-0.809091	-0.303194	0.962191	-0.533591	1.12772	-0.788313	0.99743
GSM858115	GSE34942	81.63	0	TMEcluster-A	-0.353699	-0.370254	1.18374	-0.468247	-0.260136	-0.120189	0.870647	-1.02623	-0.369559	-0.694322	0.127427	-0.934289	-0.29678	-0.724901	-0.112908	-0.122143	-0.0156152	-0.00170012	1.13685	-0.533591	-0.313736	0.42732	-0.767985
GSM858116	GSE34942	0.5	0	TMEcluster-A	-0.353699	0.158626	0.464829	-0.431849	-0.260136	1.37885	-0.767312	1.94002	-0.369559	-0.763594	-0.483374	-0.0368677	2.54897	-0.900937	-0.221574	-1.11116	2.32997	0.16645	-0.889725	1.08143	-0.636738	-0.804389	-1.58399
GSM858117	GSE34942	2.97	0	TMEcluster-A	-0.353699	-0.75005	1.08611	-0.797476	-0.260136	1.87744	-0.265667	-1.02623	-0.369559	0.734976	-0.483374	-1.21972	-0.29678	-0.925036	0.152002	-0.454217	0.163257	-0.352359	0.0894268	-0.480458	-0.636738	-0.434639	0.54014
GSM858118	GSE34942	48.03	0	TMEcluster-A	-0.353699	0.453879	-0.23795	-0.418935	-0.260136	0.825341	-0.761007	-1.02623	-0.369559	1.3851	-0.483374	-1.21972	-0.29678	0.40165	-0.384547	0.257144	0.139045	-0.266236	0.241756	-0.533591	0.960775	-0.437588	0.987084
GSM858119	GSE34942	126.83	0	TMEcluster-A	-0.353699	1.4673	-0.59479	-0.85693	-0.260136	1.78556	-0.767312	-1.02623	-0.369559	-0.763594	-0.483374	1.08798	0.627415	-0.925036	-0.897887	1.20126	-0.809091	-0.504685	3.322	-0.533591	-0.636738	-0.804389	1.28137
GSM858120	GSE34942	116.9	0	TMEcluster-C	-0.353699	-0.85549	1.05299	0.328692	-0.260136	-1.62682	-0.767312	0.52056	1.92321	-0.539131	-0.483374	0.676882	-0.29678	0.378646	0.666646	0.0113764	-0.809091	0.20394	0.143394	-0.533591	-0.636738	-0.0484312	-0.173564
GSM858121	GSE34942	35.87	1	TMEcluster-B	-0.353699	0.477926	-1.19503	-0.603955	-0.260136	0.345446	-0.767312	-0.0222534	-0.369559	-0.763594	2.96967	-0.143652	0.0852113	0.593838	2.08369	1.31054	0.0840238	-0.314229	-0.690534	-0.533591	-0.636738	-0.0563507	1.08898
GSM858122	GSE34942	19.53	1	TMEcluster-A	-0.353699	-0.85549	2.06712	-0.85693	-0.260136	0.855874	-0.767312	-0.684021	-0.369559	-0.39441	-0.483374	1.14898	-0.29678	-0.857876	-0.965266	-0.936942	-0.25358	-0.160971	0.195373	-0.533591	1.08393	-0.279149	-1.34304
GSM858123	GSE34942	9.13	1	TMEcluster-A	-0.353699	0.527225	1.0831	0.346153	-0.260136	-0.395448	-0.767312	0.468574	-0.369559	-0.713541	-0.483374	1.09151	-0.29678	-0.369826	-0.469507	-0.282376	-0.117627	-0.334597	0.181901	-0.533591	0.0843002	-0.179526	0.501122
GSM858124	GSE34942	5.57	0	TMEcluster-B	-0.353699	-0.85549	-1.21902	-0.85693	-0.260136	0.216535	-0.767312	-0.625786	0.959877	-0.682476	-0.483374	0.841928	-0.29678	1.57475	-0.611477	2.507	0.275836	-0.504685	-0.889725	0.125746	0.177291	0.333661	0.384529
GSM858125	GSE34942	33.03	1	TMEcluster-A	1.57223	0.0894892	0.740417	0.307358	-0.260136	1.53197	-0.542928	-1.02623	-0.369559	0.855854	-0.483374	-1.21972	-0.29678	-0.623944	-0.725568	-0.78465	-0.809091	-0.158184	-0.889725	-0.293161	0.918541	-0.804389	0.203332
GSM858126	GSE34942	15.83	1	TMEcluster-A	-0.353699	-0.8176	2.11588	-0.849088	-0.260136	-0.387936	-0.767312	-0.931887	-0.0476425	0.322431	-0.483374	0.136866	-0.29678	-0.809809	-0.822331	-0.0777537	0.997231	-0.1001	0.0956234	-0.533591	-0.636738	-0.12088	-2.09483
GSM858127	GSE34942	16.53	1	TMEcluster-A	1.27037	-0.554706	1.34982	-0.108488	-0.260136	0.800355	0.0657323	-1.02623	-0.369559	0.71886	-0.483374	-0.902039	-0.29678	-0.647595	-1.14869	-0.668879	-0.809091	0.49038	-0.370844	-0.533591	-0.532891	-0.455417	0.236166
GSM858128	GSE34942	24.47	0	TMEcluster-A	-0.353699	-0.85549	0.532805	-0.464939	-0.260136	-0.117583	-0.0679659	-1.02623	-0.369559	-0.763594	-0.483374	1.75546	-0.29678	0.150264	0.112349	0.703132	-0.809091	-0.504685	0.84807	-0.533591	0.208943	-0.169013	-1.35563
GSM858129	GSE34942	2.5	1	TMEcluster-B	-0.353699	-0.130535	-0.728853	-0.85693	-0.260136	0.112567	-0.689443	0.143347	-0.369559	-0.763594	-0.086345	-0.279296	0.720832	1.42911	-0.300697	0.27508	-0.809091	0.0944107	-0.889725	0.949019	-0.636738	1.97141	0.217848
GSM858130	GSE34942	9.27	1	TMEcluster-A	-0.353699	-0.83388	-1.314	1.05251	-0.260136	0.240783	-0.354833	2.99783	-0.369559	-0.391564	-0.483374	-0.288767	-0.29678	-0.925036	-0.764056	2.33142	0.0120229	-0.204002	1.50288	-0.533591	1.14687	0.477869	1.45448
GSM858131	GSE34942	26.87	0	TMEcluster-A	1.90186	-0.85549	0.57966	0.538904	-0.260136	0.146279	0.515699	-0.664207	-0.369559	0.558258	-0.483374	-0.824283	-0.29678	-0.7358	0.260995	0.53018	-0.809091	-0.504685	-0.344553	-0.533591	-0.636738	-0.708801	0.330756
GSM858132	GSE34942	136.1	0	TMEcluster-C	-0.0681409	-0.85549	1.74074	-0.0479636	-0.260136	-0.798186	-0.383966	0.508909	-0.369559	2.6556	-0.483374	-1.21972	-0.29678	-0.925036	-0.89286	-0.43711	-0.606722	-0.090253	-0.889725	-0.118467	0.866185	-0.804389	-0.741449
GSM858133	GSE34942	106.27	1	TMEcluster-C	-0.353699	1.03158	-0.304502	3.05477	-0.260136	-1.11781	-0.270892	-0.390332	-0.369559	-0.763594	1.21407	-0.23381	0.996787	-0.925036	0.0351098	0.751762	1.47565	-0.504685	1.41782	-0.533591	-0.636738	-0.74385	-0.0771345
GSM858134	GSE34942	136.93	0	TMEcluster-C	-0.353699	-0.85549	-0.547566	3.06357	-0.260136	-1.27919	2.2829	-0.786143	-0.369559	0.307345	0.531933	-1.21972	-0.29678	1.02474	1.02119	-0.407986	-0.0948483	-0.478001	0.172768	-0.533591	-0.636738	-0.140326	-0.109865
GSM858135	GSE34942	11.6	0	TMEcluster-B	-0.353699	-0.85549	-0.613886	-0.781308	-0.260136	0.736237	0.577483	0.678941	-0.369559	-0.763594	0.938636	0.185528	-0.29678	0.238285	1.29945	-0.704297	-0.809091	-0.15117	-0.889725	2.44589	-0.636738	0.339552	1.26301
GSM858136	GSE34942	10.57	0	TMEcluster-A	-0.353699	-0.625257	-0.435258	1.2364	-0.260136	1.35323	0.865803	-1.02623	-0.369559	1.9844	-0.483374	-1.21972	-0.29678	-0.875079	-0.533229	-0.410916	1.54931	0.230896	0.814823	-0.533591	1.15565	-0.61963	0.988201
GSM858137	GSE34942	2.97	0	TMEcluster-B	-0.353699	1.45011	-0.664043	-0.85693	-0.260136	-0.44278	-0.767312	0.930567	-0.369559	-0.763594	-0.483374	0.684981	-0.29678	0.327119	-1.42144	-0.0883452	-0.809091	5.806	0.283093	-0.533591	-0.636738	0.39862	1.06568
TCGA-3M-AB46	TCGA-STAD	58.83	0	TMEcluster-B	-0.920309	-0.381611	-0.442856	-0.701301	-0.054965	1.14717	-0.486271	-0.756273	0.920094	-0.0534522	0.024562	-0.462386	-0.612197	1.27096	0.980232	-0.266656	-0.319928	-0.553858	-0.697949	-0.536161	-0.220791	-0.441367	-0.316698
TCGA-B7-5818	TCGA-STAD	11.87	0	TMEcluster-C	-0.779058	-0.381611	-0.442856	0.810005	-0.054965	-1.32125	1.88396	-0.46829	0.543784	-0.0534522	-0.40228	-0.375734	0.472093	-0.0545717	1.56707	0.974764	0.259354	-0.726004	0.255176	-0.579406	-0.220791	-0.437443	-0.0338291
TCGA-B7-A5TI	TCGA-STAD	19.83	0	TMEcluster-A	0.173375	-0.381611	-0.442856	-0.128874	-0.054965	0.0254433	0.0276972	-0.105338	0.783017	-0.0534522	0.181148	-0.462386	-0.48803	-0.107164	0.435675	0.951038	-0.319928	-0.630713	-0.280135	-0.470768	-0.220791	-0.441367	0.618489
TCGA-B7-A5TJ	TCGA-STAD	11.17	0	TMEcluster-B	-0.460102	-0.381611	-0.442856	-1.08521	-0.054965	-0.0217267	-0.858063	-0.756273	0.405641	-0.0534522	-0.0745261	-0.462386	-0.829579	2.70574	-0.369311	0.131301	-0.319928	-0.726004	-0.433793	-0.579406	-0.220791	-0.441367	-0.195554
TCGA-B7-A5TK	TCGA-STAD	9.6	0	TMEcluster-C	-0.140362	-0.381611	-0.256271	2.35987	-0.054965	-1.29062	3.06455	-0.271304	-0.802319	-0.0534522	-0.601315	1.55966	0.634185	-0.89569	1.72836	-0.631704	-0.204589	-0.576454	0.252107	-0.579406	-0.220791	-0.441367	0.929158
TCGA-B7-A5TN	TCGA-STAD	9.57	0	TMEcluster-A	-0.400235	0.0498983	-0.442856	-0.615483	-0.054965	0.384881	-0.308832	-0.756273	3.30498	-0.0534522	-1.42517	1.39831	-0.471596	-1.01463	0.817103	1.14608	1.99129	-0.726004	0.87781	-0.579406	-0.220791	-0.217528	1.50309
TCGA-BR-4187	TCGA-STAD	4.7	1	TMEcluster-A	-0.461814	-0.381611	-0.442856	-0.346207	-0.054965	-0.459514	-0.133018	-0.756273	-0.802319	-0.0534522	0.263817	-0.462386	1.19825	-1.01463	-0.952842	1.60512	-0.319928	-0.455846	5.6519	-0.579406	-0.220791	0.84823	1.87783
TCGA-BR-4191	TCGA-STAD	18.6	1	TMEcluster-A	-0.898807	-0.381611	-0.442856	-0.772927	-0.054965	0.211028	0.299951	-0.756273	-0.802319	-0.0534522	0.912015	-0.462386	0.29898	-0.52378	0.197006	2.04268	4.94458	-0.726004	0.0221795	-0.579406	1.52505	0.157409	-0.0785429
TCGA-BR-4201	TCGA-STAD	31.33	1	TMEcluster-B	-0.40975	-0.381611	-0.344767	-1.15968	-0.054965	0.291025	0.216406	-0.756273	-0.802319	-0.0534522	1.3714	-0.462386	-0.54507	-0.398564	0.428367	1.55527	-0.319928	-0.726004	-0.697949	0.949935	-0.220791	1.35496	1.30338
TCGA-BR-4253	TCGA-STAD	4.13	1	TMEcluster-C	-0.79224	-0.381611	-0.409511	0.957277	-0.054965	-1.83704	3.98876	-0.338332	-0.802319	-0.0534522	1.87798	-0.462386	-0.516489	-0.671908	2.60963	0.273804	-0.319928	-0.520247	0.377793	-0.579406	-0.220791	-0.135942	-0.9013
TCGA-BR-4256	TCGA-STAD	9.47	1	TMEcluster-A	-0.312061	-0.381611	-0.319308	-1.15968	-0.054965	-0.185489	-0.142161	0.19738	-0.802319	-0.0534522	0.385395	-0.462386	6.93167	-0.669027	0.289262	0.738145	-0.319928	0.844886	-0.335656	-0.46848	-0.220791	1.08528	1.36313
TCGA-BR-4257	TCGA-STAD	9.8	1	TMEcluster-B	-0.772779	-0.381611	-0.410427	-0.424352	-0.054965	-0.701039	0.819626	0.620704	-0.802319	-0.0534522	1.45588	-0.462386	-0.829579	0.16413	0.0374555	1.58507	0.768538	-0.726004	-0.697949	-0.246464	-0.220791	1.81123	0.780928
TCGA-BR-4267	TCGA-STAD	6.27	1	TMEcluster-B	-0.329765	-0.381611	0.843417	-1.09656	-0.054965	0.333872	-0.373336	-0.756273	-0.802319	-0.0534522	0.568529	-0.462386	-0.829579	-0.1337	-0.64632	0.403997	-0.319928	0.654102	-0.697949	1.75583	-0.220791	2.93406	-0.424627
TCGA-BR-4279	TCGA-STAD	9.7	1	TMEcluster-B	0.111149	-0.381611	0.679627	-0.660852	-0.054965	0.129175	-0.405072	-0.756273	-0.802319	-0.0534522	0.28936	-0.462386	2.08463	0.105356	-0.705258	0.208502	-0.0144643	-0.353324	-0.697949	0.787164	-0.220791	1.48885	1.64772
TCGA-BR-4280	TCGA-STAD	6.7	1	TMEcluster-A	0.92902	-0.381611	1.51485	-0.464223	-0.054965	0.660917	-0.0871591	-0.099847	-0.802319	-0.0534522	-0.309411	-0.462386	-0.655844	-0.43995	0.753963	0.115197	-0.319928	-0.726004	-0.697949	-0.579406	-0.220791	0.0356882	-0.880321
TCGA-BR-6452	TCGA-STAD	35.17	0	TMEcluster-B	-0.495325	-0.381611	-0.442856	-0.0769731	-0.054965	0.196203	0.0491079	-0.456818	0.57116	-0.0534522	1.28119	-0.462386	-0.829579	0.631424	0.410915	0.227337	-0.311515	-0.726004	-0.697949	-0.0401568	-0.220791	-0.441367	0.319388
TCGA-BR-6453	TCGA-STAD	16.17	0	TMEcluster-A	4.24797	-0.381611	0.500574	-0.0612856	-0.054965	-1.22427	-0.144347	-0.559312	0.412119	-0.0534522	-0.881438	-0.462386	-0.564734	-0.539436	-1.00348	-0.506041	-0.319928	0.445936	-0.237778	-0.579406	-0.220791	-0.441367	0.594389
TCGA-BR-6455	TCGA-STAD	14.07	1	TMEcluster-C	-0.278833	-0.381611	-0.442856	2.48818	-0.054965	-1.75179	1.12745	0.954864	-0.717018	-0.0534522	-1.42517	2.02614	2.72473	0.46196	0.124907	-0.789646	-0.0110899	-0.326985	0.199157	-0.579406	-0.142378	-0.441367	0.11018
TCGA-BR-6456	TCGA-STAD	17.53	1	TMEcluster-A	-0.67631	-0.381611	-0.442856	-0.0736832	-0.054965	1.04495	-0.858063	-0.756273	1.5247	-0.0534522	-0.787627	0.138694	-0.0619246	-0.0683194	0.757027	0.599904	0.153113	-0.726004	0.414871	-0.579406	-0.220791	-0.441367	1.55572
TCGA-BR-6457	TCGA-STAD	13.87	0	TMEcluster-A	1.7366	-0.381611	3.10907	0.890147	-0.054965	-0.957013	-0.524776	-0.756273	0.242123	-0.0534522	-0.505938	-0.436125	0.539747	-1.01463	-0.407498	-0.077602	1.1532	-0.676844	0.742178	-0.579406	-0.220791	-0.441367	2.16984
TCGA-BR-6458	TCGA-STAD	19.6	1	TMEcluster-C	-0.372284	-0.381611	-0.442856	0.966662	-0.054965	-0.37185	-0.102151	0.543617	-0.284129	-0.0534522	0.361616	-0.462386	-0.0924926	-0.0267667	0.630546	1.02085	0.610964	-0.726004	-0.618097	-0.579406	-0.220791	-0.441367	0.78368
TCGA-BR-6563	TCGA-STAD	22.63	0	TMEcluster-C	0.527901	-0.381611	-0.333834	1.92841	-0.054965	-0.8006	0.683231	-0.756273	-0.34665	-0.0534522	0.508832	-0.462386	1.06667	-0.32189	0.0699705	-0.374536	-0.168554	-0.726004	0.670119	-0.579406	-0.220791	-0.441367	1.52337
TCGA-BR-6564	TCGA-STAD	26.47	1	TMEcluster-A	0.186968	-0.381611	-0.442856	0.7843	-0.054965	0.154799	-0.183289	-0.724507	1.38276	-0.0534522	0.0136386	-0.462386	0.872279	-1.01463	-0.2025	1.20044	-0.319928	-0.405988	0.213797	-0.579406	-0.220791	-0.441367	1.71237
TCGA-BR-6565	TCGA-STAD	9.3	1	TMEcluster-C	-0.658776	-0.283939	-0.442856	-0.870757	-0.054965	-0.520359	1.17607	0.874195	-0.288259	-0.0534522	-0.674732	1.5477	0.955487	0.951061	0.887729	-0.789783	-0.319928	-0.726004	2.16153	-0.579406	-0.220791	-0.441367	0.67716
TCGA-BR-6566	TCGA-STAD	33.23	0	TMEcluster-A	-0.74	-0.381611	-0.442856	-0.299381	-0.054965	0.582388	-0.858063	-0.513546	1.89388	-0.0534522	-1.42517	3.77335	-0.386304	0.523707	0.426558	0.387937	0.721271	-0.726004	-0.697949	-0.579406	-0.220791	-0.285509	1.3472
TCGA-BR-6705	TCGA-STAD	25.97	1	TMEcluster-A	0.85054	-0.381611	-0.442856	0.312993	-0.054965	0.306076	-0.318321	-0.756273	-0.365906	-0.0534522	1.81405	-0.462386	-0.186666	-0.575008	0.172843	0.107507	-0.319928	-0.219159	-0.402121	-0.192106	-0.220791	-0.441367	1.74962
TCGA-BR-6707	TCGA-STAD	16.37	0	TMEcluster-C	0.513408	-0.381611	0.862207	1.92334	-0.054965	-1.30271	0.466229	1.94836	0.715903	-0.0534522	-0.107756	-0.315236	-0.573511	-0.606225	0.295193	0.0882794	-0.319928	-0.655496	-0.294168	-0.579406	-0.220791	-0.441367	-0.54297
TCGA-BR-6709	TCGA-STAD	12.33	1	TMEcluster-C	-0.716591	-0.381611	-0.32276	1.57322	-0.054965	-0.123724	0.745678	-0.756273	-0.497731	-0.0534522	-0.235646	-0.462386	0.0977969	-0.369325	-0.357946	1.1625	-0.319928	0.703859	-0.184459	-0.579406	-0.220791	-0.279716	0.319713
TCGA-BR-6801	TCGA-STAD	40.77	0	TMEcluster-B	-0.843722	-0.381611	-0.442856	-1.15968	-0.054965	0.242555	-0.530565	-0.40548	1.4949	-0.0534522	2.40894	-0.462386	-0.829579	0.979587	-0.384013	0.602887	-0.319928	-0.321436	-0.697949	0.303364	-0.220791	-0.441367	0.859509
TCGA-BR-6802	TCGA-STAD	31.33	0	TMEcluster-C	-0.465405	-0.381611	-0.442856	2.64661	-0.054965	-2.23877	1.81597	1.47964	0.831212	-0.0534522	1.83955	-0.296534	0.0488332	-0.80473	-0.318104	-0.36244	-0.319928	2.58642	0.388692	-0.579406	-0.220791	-0.270935	0.398145
TCGA-BR-6803	TCGA-STAD	31.63	0	TMEcluster-A	2.46062	-0.381611	1.55511	0.448465	-0.054965	-0.073944	-0.260415	-0.733583	-0.073775	-0.0534522	-0.185661	-0.462386	0.112868	-0.960042	-0.500104	-0.35398	-0.319928	-0.726004	-0.00325887	-0.579406	-0.220791	-0.441367	1.4488
TCGA-BR-6852	TCGA-STAD	45.57	0	TMEcluster-C	-0.279899	-0.381611	-0.230174	1.73027	-0.054965	-0.739148	1.32347	-0.138302	0.325722	-0.0534522	1.33459	0.112896	-0.829579	-0.00588031	0.291145	-0.472557	-0.0662656	-0.726004	0.10469	-0.579406	-0.220791	-0.441367	0.394011
TCGA-BR-7196	TCGA-STAD	22.2	0	TMEcluster-A	1.3823	-0.381611	4.0848	1.0036	-0.054965	-0.84554	-0.31396	-0.756273	-0.7448	-0.0534522	-0.0917878	-0.462386	0.531362	-0.778975	0.186988	-0.40243	-0.319928	-0.220856	-0.31792	-0.579406	-0.220791	-0.441367	1.53272
TCGA-BR-7197	TCGA-STAD	9.33	0	TMEcluster-B	0.086456	-0.381611	-0.367363	-1.15968	-0.054965	-0.97769	-0.858063	-0.60101	0.545858	-0.0534522	-0.126084	-0.462386	-0.829579	2.62848	-0.222765	0.75912	-0.319928	-0.726004	-0.697949	-0.579406	-0.220791	-0.441367	0.230024
TCGA-BR-7704	TCGA-STAD	35.73	0	TMEcluster-C	-0.413575	-0.381611	-0.430166	1.10637	-0.054965	0.0835003	1.25568	0.18258	2.31944	-0.0534522	0.197661	-0.462386	0.018821	-0.187515	0.605581	-0.575148	-0.26945	-0.726004	-0.697949	-0.579406	-0.220791	-0.441367	0.0415388
TCGA-BR-7707	TCGA-STAD	36.33	0	TMEcluster-C	-0.46874	-0.381611	-0.258948	0.53008	-0.054965	-0.704121	3.48134	-0.163387	-0.802319	-0.0534522	1.52297	-0.252936	0.340481	-0.0726997	0.418101	-0.558959	-0.319928	0.82377	-0.697949	-0.579406	-0.220791	-0.262671	0.41955
TCGA-BR-7715	TCGA-STAD	34.1	0	TMEcluster-B	-0.314532	-0.381611	-0.442856	-0.543628	-0.054965	-1.08839	-0.298535	-0.21712	0.228998	-0.0534522	-0.458146	-0.462386	-0.829579	2.48379	-0.253465	0.725086	-0.319928	-0.726004	-0.294444	-0.579406	-0.220791	-0.441367	1.0048
TCGA-BR-7716	TCGA-STAD	40.33	0	TMEcluster-C	-0.182931	-0.381611	-0.442856	1.38379	-0.054965	-0.14441	0.451857	0.124518	1.30962	-0.0534522	0.397991	-0.462386	0.54024	-0.494932	0.563369	-0.207447	-0.319928	-0.726004	0.227688	-0.579406	-0.220791	-0.441367	0.388509
TCGA-BR-7717	TCGA-STAD	18.4	1	TMEcluster-B	0.686345	0.768129	-0.442856	-0.200713	-0.054965	-0.389185	-0.527709	-0.756273	-0.0780766	-0.0534522	0.0308555	-0.462386	1.13033	0.382557	-0.132529	-0.658561	-0.319928	-0.726004	-0.697949	1.76364	-0.220791	-0.441367	0.774422
TCGA-BR-7722	TCGA-STAD	15.53	1	TMEcluster-A	-0.344767	-0.381611	-0.442856	-0.963061	-0.054965	0.839973	-0.858063	-0.756273	3.35476	-0.0534522	-1.42517	3.10366	-0.0738423	-0.585464	-1.05618	0.595023	-0.319928	-0.240483	3.0953	-0.579406	-0.220791	-0.441367	0.0901292
TCGA-BR-7723	TCGA-STAD	29.13	1	TMEcluster-C	-0.0408868	-0.381611	0.198478	0.237678	-0.054965	-0.493076	0.315446	0.224812	-0.66791	-0.0534522	-0.253477	-0.462386	0.063934	1.16046	0.172343	-0.0064439	-0.319928	-0.726004	-0.341146	-0.579406	-0.220791	-0.441367	-0.0711981
TCGA-BR-7901	TCGA-STAD	3.5	1	TMEcluster-B	-0.710631	-0.381611	-0.442856	0.234766	-0.054965	-0.871508	-0.434936	-0.756273	1.43332	-0.0534522	-0.631345	-0.462386	-0.345935	2.24062	0.167659	-0.050185	-0.319928	0.139285	-0.697949	-0.579406	-0.220791	-0.397066	0.799445
TCGA-BR-7957	TCGA-STAD	9.2	1	TMEcluster-A	-0.00964874	-0.381611	-0.442856	-0.84867	-0.054965	0.886009	-0.563844	-0.756273	-0.802319	-0.0534522	-0.226426	-0.462386	-0.262797	-0.27383	-0.287401	0.864017	-0.319928	-0.399172	2.83002	-0.579406	-0.220791	0.143491	1.68352
TCGA-BR-7958	TCGA-STAD	29.97	0	TMEcluster-C	0.0121257	-0.381611	-0.164878	1.63075	-0.054965	-1.35018	1.14441	2.11435	0.357715	-0.0534522	-1.02693	1.61172	0.873565	-0.692218	1.78432	-0.946249	2.51422	-0.301061	0.118396	-0.579406	-0.220791	-0.441367	0.528024
TCGA-BR-7959	TCGA-STAD	33.67	0	TMEcluster-A	-0.359578	-0.381611	-0.436511	-0.5142	-0.054965	0.164509	-0.429663	-0.756273	-0.802319	-0.0534522	0.325885	-0.462386	0.545364	-0.418186	0.0697804	1.77331	-0.319928	0.681914	1.24286	-0.579406	-0.220791	-0.441367	1.46263
TCGA-BR-8058	TCGA-STAD	37.77	0	TMEcluster-A	-0.505169	-0.049682	-0.442856	0.671304	-0.054965	0.765838	1.09441	-0.733583	-0.802319	-0.0534522	0.423775	-0.462386	1.59311	-0.420149	-0.0853944	-0.525102	-0.319928	-0.650616	1.39613	-0.579406	0.0144478	-0.441367	0.599686
TCGA-BR-8059	TCGA-STAD	14.63	1	TMEcluster-B	-0.638618	-0.381611	-0.442856	-0.550497	-0.054965	0.379232	-0.23867	-0.420415	1.34542	-0.0534522	1.65576	-0.462386	-0.548587	0.0513941	0.372429	0.657535	-0.319928	-0.383187	-0.697949	0.459196	-0.220791	-0.441367	1.52115
TCGA-BR-8060	TCGA-STAD	11.6	1	TMEcluster-B	-0.168188	-0.381611	1.19467	-0.255274	-0.054965	-0.908059	-0.0483586	-0.382369	-0.802319	-0.0534522	0.0819117	-0.462386	0.311843	0.701981	0.41124	0.488626	-0.319928	0.0866957	-0.697949	0.761995	-0.220791	-0.441367	0.468479
TCGA-BR-8077	TCGA-STAD	0.7	0	TMEcluster-C	0.193289	-0.381611	-0.109445	0.705275	-0.054965	-0.137618	1.19261	-0.756273	-0.292264	-0.0534522	-0.224403	-0.462386	0.0482287	-0.136576	0.0866163	0.268232	0.515044	0.324735	-0.692265	-0.579406	-0.220791	-0.441367	-0.447641
TCGA-BR-8080	TCGA-STAD	9.73	1	TMEcluster-B	-0.555862	1.42959	-0.343126	-0.468369	-0.054965	0.342951	-0.507174	-0.756273	-0.233076	-0.0534522	1.45208	-0.462386	0.222366	-0.0408118	-0.469359	0.104118	-0.319928	-0.395331	-0.697949	1.42443	-0.220791	-0.441367	1.50713
TCGA-BR-8081	TCGA-STAD	32.7	0	TMEcluster-C	-0.0779866	-0.381611	-0.442856	-0.0902328	-0.054965	0.167772	0.0261476	0.879428	0.0596735	-0.0534522	0.589108	-0.462386	-0.145207	-0.421477	1.67014	0.285656	-0.319928	-0.615713	-0.697949	0.203395	-0.220791	-0.441367	0.678537
TCGA-BR-8284	TCGA-STAD	8.17	1	TMEcluster-A	-0.321447	-0.381611	-0.436511	1.27774	-0.054965	1.30472	0.320587	-0.165785	-0.285479	-0.0534522	0.40876	-0.462386	-0.0393915	-0.762454	-0.457667	0.503222	-0.319928	-0.580136	-0.697949	-0.561137	-0.220791	-0.441367	0.391489
TCGA-BR-8286	TCGA-STAD	29.83	0	TMEcluster-C	-1.00983	-0.285511	-0.442856	1.13665	-0.054965	-1.82408	-0.249078	-0.122587	3.36154	-0.0534522	-1.42517	0.784207	-0.449685	-0.269443	0.854956	1.80649	1.1223	-0.213878	1.31068	-0.579406	-0.220791	-0.441367	-0.243205
TCGA-BR-8289	TCGA-STAD	2.7	1	TMEcluster-A	-0.335949	-0.381611	-0.442856	-0.400253	-0.054965	-1.48821	-0.692416	-0.756273	1.41494	-0.0534522	0.234047	-0.462386	-0.829579	2.06871	-0.45654	0.764644	-0.319928	-0.726004	1.25717	-0.579406	-0.220791	-0.441367	0.556646
TCGA-BR-8291	TCGA-STAD	20.23	1	TMEcluster-A	-0.664974	-0.381611	-0.442856	0.643869	-0.054965	0.058403	-0.350117	-0.756273	-0.236909	-0.0534522	-0.739084	-0.462386	0.865937	-0.554838	-0.814279	2.2504	0.989694	-0.351179	1.34139	-0.579406	-0.220791	-0.441367	1.49742
TCGA-BR-8295	TCGA-STAD	2.23	1	TMEcluster-A	4.77907	-0.381611	-0.142311	-0.398664	-0.054965	-1.56593	-0.858063	1.11653	-0.802319	-0.0534522	-1.42517	3.02704	0.502926	0.184954	-1.19844	-1.5594	-0.319928	-0.507766	0.307165	-0.579406	-0.220791	-0.441367	-1.62347
TCGA-BR-8296	TCGA-STAD	15.8	1	TMEcluster-A	0.409705	3.2925	-0.442856	-0.0351221	-0.054965	0.701517	-0.0530287	-0.756273	-0.802319	-0.0534522	0.675474	-0.462386	0.0883994	-0.807332	-0.490174	-0.977706	-0.319928	0.55791	-0.39265	-0.579406	-0.220791	-0.441367	-0.599776
TCGA-BR-8297	TCGA-STAD	7.5	0	TMEcluster-A	1.75045	-0.115215	-0.442856	-0.173681	-0.054965	1.18536	-0.50532	-0.361353	-0.802319	-0.0534522	-0.505186	-0.462386	-0.0630793	-1.01463	0.323961	-0.102169	-0.319928	-0.475307	0.269409	-0.579406	-0.220791	-0.441367	1.17909
TCGA-BR-8361	TCGA-STAD	31.53	0	TMEcluster-C	-0.556929	-0.381611	-0.426993	2.01484	-0.054965	-1.49634	0.119644	3.59103	3.12881	-0.0534522	-1.34538	0.864461	-0.493026	-1.01463	0.187651	0.241031	-0.319928	2.30211	-0.181973	-0.579406	-0.220791	0.191093	-0.724975
TCGA-BR-8364	TCGA-STAD	22.5	0	TMEcluster-A	0.185077	-0.381611	-0.442856	-0.348414	-0.054965	1.22481	-0.759264	-0.756273	-0.802319	-0.0534522	-0.482933	-0.290608	0.0777224	-0.868739	-0.824683	1.25197	-0.319928	0.311094	2.24635	-0.579406	-0.220791	-0.441367	2.14123
TCGA-BR-8365	TCGA-STAD	17.77	1	TMEcluster-A	0.20201	-0.381611	-0.442856	0.218162	-0.054965	1.95164	-0.858063	-0.756273	-0.802319	-0.0534522	-0.382679	-0.462386	0.60444	-1.01463	-0.225775	0.49901	-0.319928	-0.448724	1.0999	-0.579406	-0.220791	-0.441367	1.35982
TCGA-BR-8366	TCGA-STAD	0.97	0	TMEcluster-C	-0.372109	-0.245309	-0.0704591	1.23613	-0.054965	-1.33213	0.955047	0.477137	-0.223141	-0.0534522	0.803207	-0.462386	-0.44705	-0.283208	1.79232	0.687431	-0.319928	-0.450856	-0.434651	-0.579406	-0.220791	-0.441367	0.201569
TCGA-BR-8367	TCGA-STAD	26.7	1	TMEcluster-A	0.382343	-0.381611	-0.335956	0.52682	-0.054965	0.693161	-0.779147	-0.449223	-0.802319	-0.0534522	0.100509	-0.462386	2.03464	-0.524786	-1.06695	-0.189717	-0.319928	-0.388734	2.71684	-0.579406	-0.220791	-0.441367	0.721806
TCGA-BR-8368	TCGA-STAD	4.37	0	TMEcluster-C	0.0354021	-0.381611	-0.265727	0.683047	-0.054965	1.10502	0.179268	1.1307	3.32677	-0.0534522	-0.295387	-0.462386	-0.0010765	-0.448319	-0.55132	-0.833587	-0.319928	-0.550961	-0.697949	-0.566357	-0.220791	-0.441367	-1.26049
TCGA-BR-8369	TCGA-STAD	14.23	0	TMEcluster-B	1.74666	1.05772	-0.442856	-1.15968	-0.054965	0.748475	-0.858063	-0.756273	-0.802319	-0.0534522	1.4141	-0.462386	-0.829579	-0.4656	-0.296263	-0.223969	-0.319928	-0.487249	-0.697949	0.319192	-0.220791	-0.441367	0.0427707
TCGA-BR-8371	TCGA-STAD	11.97	1	TMEcluster-A	4.29352	0.0694038	-0.442856	-0.394471	-0.054965	-0.190397	-0.366236	-0.756273	-0.501072	-0.0534522	-0.462865	-0.462386	-0.263644	-0.998576	-0.902801	-0.505594	-0.319928	0.458828	-0.435324	-0.579406	-0.220791	-0.441367	0.72693
TCGA-BR-8372	TCGA-STAD	31.7	0	TMEcluster-C	-1.09503	-0.381611	-0.442856	0.791164	-0.054965	-1.18711	1.44002	1.25281	-0.0535914	-0.0534522	1.03915	-0.462386	-0.405069	-0.360857	2.05269	0.638469	2.49779	-0.726004	0.122146	-0.579406	-0.220791	-0.441367	-0.898574
TCGA-BR-8373	TCGA-STAD	15	0	TMEcluster-B	-0.603468	-0.381611	-0.442856	-1.02217	-0.054965	1.81058	-0.641528	-0.756273	-0.802319	-0.0534522	0.73619	-0.462386	0.792307	0.645362	-0.356096	-0.361239	-0.244211	1.01952	-0.697949	-0.0583326	-0.220791	-0.336947	0.446996
TCGA-BR-8381	TCGA-STAD	7.47	0	TMEcluster-C	-0.239082	-0.381611	-0.442856	0.973996	-0.054965	0.444051	0.83592	1.2004	0.121137	-0.0534522	0.563378	-0.462386	0.65345	-0.284013	0.436009	-1.0641	-0.303102	-0.388544	0.263143	-0.579406	-0.220791	-0.441367	0.0217267
TCGA-BR-8382	TCGA-STAD	25.4	1	TMEcluster-C	-1.1281	0.344972	-0.442856	-0.521987	-0.054965	-0.548107	0.0270158	1.69373	-0.42292	-0.0534522	2.24245	-0.292875	-0.116258	-0.277032	2.82326	0.393129	-0.319928	-0.669752	-0.206559	-0.579406	-0.220791	0.266463	0.814416
TCGA-BR-8384	TCGA-STAD	3.77	0	TMEcluster-A	-0.215164	-0.381611	-0.442856	0.247657	-0.054965	1.49149	-0.858063	-0.756273	-0.802319	-0.0534522	-1.02296	-0.141096	0.821551	-1.01463	0.113	0.504997	-0.319928	0.106293	2.54296	-0.579406	-0.220791	-0.441367	1.42695
TCGA-BR-8483	TCGA-STAD	5.47	0	TMEcluster-C	0.589157	-0.381611	0.680533	-0.565987	-0.054965	-1.62226	-0.506146	-0.589413	1.59417	-0.0534522	-0.183619	-0.462386	-0.829579	2.1268	1.17147	-0.773394	-0.319928	-0.726004	-0.234011	-0.579406	-0.220791	-0.441367	-0.499877
TCGA-BR-8484	TCGA-STAD	25.53	1	TMEcluster-A	0.024461	-0.381611	-0.164791	-0.629667	-0.054965	1.27112	-0.125258	0.615011	-0.802319	-0.0534522	-0.10379	-0.462386	-0.829579	0.413403	0.244517	0.12634	-0.319928	-0.535206	-0.615629	-0.579406	-0.220791	-0.441367	-0.166714
TCGA-BR-8485	TCGA-STAD	9.33	0	TMEcluster-A	-0.584187	-0.381611	0.576768	1.18252	-0.054965	1.64243	-0.0368494	-0.756273	-0.802319	-0.0534522	0.495429	-0.462386	1.16651	-0.0172034	-0.492678	-1.16644	0.00507604	-0.460816	-0.0930015	-0.579406	-0.220791	-0.441367	0.439137
TCGA-BR-8486	TCGA-STAD	20.5	0	TMEcluster-B	0.173686	-0.381611	0.0933058	-1.15968	-0.054965	0.914167	0.812376	-0.668221	0.283664	-0.0534522	1.07435	-0.462386	-0.829579	0.905275	-0.665393	-1.26695	-0.319928	-0.00946898	-0.697949	0.882042	-0.220791	-0.441367	0.414866
TCGA-BR-8487	TCGA-STAD	1.13	0	TMEcluster-C	-0.842469	-0.381611	-0.385872	-0.35346	-0.054965	-0.108898	0.21478	0.819002	1.12776	-0.0534522	0.215723	-0.462386	-0.829579	0.305862	1.36466	0.952171	-0.319928	-0.726004	-0.342306	-0.579406	-0.220791	-0.441367	-0.599101
TCGA-BR-8588	TCGA-STAD	12.97	0	TMEcluster-A	-0.157395	0.119895	-0.442856	0.629929	-0.054965	-0.385444	0.350563	0.24663	-0.802319	-0.0534522	0.304009	-0.462386	-0.829579	-0.015154	-0.316884	0.62447	-0.319928	-0.152534	0.538147	-0.579406	-0.220791	0.553478	0.797006
TCGA-BR-8589	TCGA-STAD	27.5	0	TMEcluster-C	-0.478752	-0.381611	-0.280433	2.0067	-0.054965	-1.26919	0.400001	2.37594	0.880798	-0.0534522	-0.0494911	-0.462386	-0.0845598	-1.01463	2.53368	-0.0349857	2.60561	-0.417077	-0.32951	-0.579406	-0.220791	-0.441367	-1.89746
TCGA-BR-8590	TCGA-STAD	9.47	1	TMEcluster-A	1.46062	-0.381611	0.448274	-0.339254	-0.054965	0.915236	-0.126385	-0.756273	-0.802319	-0.0534522	-0.215354	-0.462386	0.313778	-0.489215	-0.717911	-0.254163	-0.319928	-0.0335614	0.559536	-0.579406	-0.220791	-0.441367	1.15485
TCGA-BR-8591	TCGA-STAD	28.53	0	TMEcluster-C	-0.769627	0.274583	-0.404038	-0.616274	-0.054965	-1.06507	0.212496	1.52744	-0.802319	-0.0534522	-1.42517	2.24989	-0.829579	0.743332	1.8424	0.300347	-0.319928	0.264175	0.827759	-0.579406	-0.220791	-0.090158	0.312032
TCGA-BR-8592	TCGA-STAD	6.37	1	TMEcluster-A	0.554126	1.15677	-0.442856	0.242747	-0.054965	0.950676	-0.150595	-0.756273	-0.802319	-0.0534522	0.0964988	-0.462386	0.256611	-1.01463	-0.815933	0.65778	-0.319928	-0.657552	0.17814	-0.579406	-0.220791	-0.441367	1.57162
TCGA-BR-8676	TCGA-STAD	7.63	0	TMEcluster-C	-0.877555	-0.381611	-0.329622	2.33819	-0.054965	-1.47079	1.62176	-0.756273	2.01744	-0.0534522	-0.701059	-0.462386	0.0974057	-1.01463	0.425389	2.14548	-0.0126946	-0.726004	-0.697949	-0.451619	-0.220791	0.169905	-1.78934
TCGA-BR-8677	TCGA-STAD	27.1	0	TMEcluster-C	-0.625144	-0.381611	-0.21503	1.53062	-0.054965	0.851388	-0.0166082	1.35385	-0.09485	-0.0534522	-1.42517	1.26297	1.51577	-1.01463	2.67744	-1.08713	-0.184134	-0.726004	-0.121003	-0.579406	-0.220791	-0.441367	0.809562
TCGA-BR-8678	TCGA-STAD	25.13	0	TMEcluster-C	-0.0952826	-0.381611	-0.433338	0.641382	-0.054965	-2.87139	-0.0701397	1.39959	0.384021	-0.0534522	0.456635	-0.462386	-0.829579	1.61068	2.03921	-0.186834	-0.319928	1.39228	-0.697949	-0.543568	-0.220791	-0.441367	-0.424056
TCGA-BR-8680	TCGA-STAD	32.4	0	TMEcluster-C	-0.848852	2.55772	-0.442856	1.39159	-0.054965	-1.51688	-0.858063	0.684897	-0.802319	-0.0534522	0.359062	-0.462386	1.16821	1.22798	0.039896	-1.26178	0.770147	-0.726004	-0.697949	0.721879	-0.220791	-0.441367	-0.702775
TCGA-BR-8682	TCGA-STAD	33.03	0	TMEcluster-B	-0.609208	0.543018	-0.442856	-1.15968	-0.054965	-0.252335	-0.858063	-0.610712	0.551618	-0.0534522	-0.35611	1.42365	-0.829579	2.93657	-1.22606	-0.868931	-0.319928	-0.726004	0.955837	-0.579406	-0.220791	-0.441367	0.756426
TCGA-BR-8683	TCGA-STAD	10	1	TMEcluster-A	-0.832589	0.389893	-0.442856	-0.0635911	-0.054965	0.403882	0.427559	-0.756273	-0.802319	-0.0534522	-1.42517	1.85987	1.07113	0.606691	-0.638145	-1.36781	-0.319928	1.30483	2.69284	-0.579406	3.02727	-0.441367	0.520908
TCGA-BR-8686	TCGA-STAD	21.17	1	TMEcluster-A	0.74737	-0.381611	-0.420648	0.961129	-0.054965	0.384192	0.122075	0.272299	-0.802319	-0.0534522	0.0768584	-0.462386	0.480218	-1.01463	0.31594	0.320026	-0.319928	-0.412688	0.0648583	-0.579406	-0.220791	-0.441367	0.0852407
TCGA-BR-8687	TCGA-STAD	8.33	1	TMEcluster-A	-0.518705	-0.381611	-0.344308	-0.790121	-0.054965	2.16865	-0.858063	-0.756273	-0.802319	-0.0534522	-0.194392	-0.462386	-0.00519264	-1.01463	-0.138113	1.92276	2.416	-0.294282	-0.147081	-0.579406	-0.220791	-0.441367	0.479844
TCGA-BR-8690	TCGA-STAD	10.83	0	TMEcluster-C	-0.917406	-0.381611	-0.442856	1.53641	-0.054965	-0.184042	1.92604	-0.0505652	-0.469906	-0.0534522	-1.42517	1.69119	0.673787	-0.453912	0.853151	-0.722243	-0.0106292	-0.726004	2.14777	-0.579406	2.59474	-0.441367	-0.0614036
TCGA-BR-A44T	TCGA-STAD	34.6	0	TMEcluster-A	4.10136	1.49801	-0.110334	-0.302913	-0.054965	-0.217958	-0.459667	-0.756273	-0.729075	-0.0534522	-0.531165	-0.462386	-0.287421	-0.660611	-0.908092	-1.23749	-0.319928	-0.481191	-0.697949	-0.579406	-0.220791	-0.441367	0.445307
TCGA-BR-A44U	TCGA-STAD	14.07	1	TMEcluster-A	-0.125305	-0.381611	-0.442856	-1.099	-0.054965	0.388132	-0.858063	-0.075578	0.474542	-0.0534522	-1.42517	2.69991	-0.545947	-0.495779	0.794035	0.584959	8.66607	-0.726004	0.878241	-0.579406	-0.220791	-0.441367	0.216521
TCGA-BR-A4CS	TCGA-STAD	1.5	1	TMEcluster-B	-1.10397	-0.381611	-0.426993	-1.13348	-0.054965	-0.305986	1.02608	-0.756273	-0.802319	-0.0534522	1.04291	-0.462386	-0.271734	0.281402	-1.13047	-0.470581	-0.319928	4.50824	-0.697949	2.22977	-0.220791	2.74642	0.0275527
TCGA-BR-A4IV	TCGA-STAD	28.97	1	TMEcluster-A	-0.425333	-0.198587	-0.442856	-0.693375	-0.054965	1.2921	-0.759535	-0.756273	-0.802319	-0.0534522	0.0514483	-0.462386	0.961073	-1.01463	-1.14023	2.56847	-0.319928	0.115129	-0.48745	0.845734	-0.220791	-0.441367	2.55616
TCGA-BR-A4J4	TCGA-STAD	0.53	0	TMEcluster-A	-0.417576	-0.381611	-0.442856	-0.0560453	-0.054965	-0.324213	-0.636354	1.00405	-0.18777	-0.0534522	-1.09556	0.362931	0.191779	-1.01463	0.941024	1.65924	8.3008	0.297893	-0.119272	-0.579406	-0.220791	-0.441367	0.0549627
TCGA-BR-A4J5	TCGA-STAD	28.73	0	TMEcluster-A	-0.0691497	-0.381611	-0.439684	-0.204338	-0.054965	0.480833	-0.660392	-0.756273	-0.802319	-0.0534522	0.457789	-0.462386	-0.748079	0.350602	-1.0177	0.794147	0.451174	-0.436246	1.67171	-0.269915	-0.220791	-0.441367	1.6791
TCGA-BR-A4J6	TCGA-STAD	0.67	0	TMEcluster-A	2.12786	-0.381611	8.6243	0.742549	-0.054965	-0.550793	-0.476172	-0.756273	-0.603146	-0.0534522	-0.972725	-0.462386	0.478657	-0.924989	-1.22606	-1.60368	-0.319928	-0.297711	-0.697949	-0.42308	-0.220791	-0.441367	0.316696
TCGA-BR-A4J7	TCGA-STAD	32.97	0	TMEcluster-C	-0.414323	-0.381611	-0.414303	4.2063	-0.054965	-1.35553	-0.692169	0.420161	0.598416	-0.0534522	-1.42517	2.22146	1.76759	-0.796145	0.573003	-0.424619	-0.319928	-0.726004	1.16885	-0.579406	-0.220791	-0.441367	1.21262
TCGA-BR-A4J8	TCGA-STAD	13.7	0	TMEcluster-A	0.177123	0.263292	-0.442856	-0.659694	-0.054965	-0.650041	-0.858063	-0.426525	0.00362702	-0.0534522	-1.42517	5.02418	-0.426233	-0.136112	-5.04188e-05	0.861816	-0.319928	-0.726004	2.68942	-0.579406	-0.220791	-0.441367	0.550129
TCGA-BR-A4J9	TCGA-STAD	0.47	0	TMEcluster-A	0.475103	2.41839	0.140954	-0.622134	-0.054965	1.53334	-0.661081	-0.756273	-0.802319	-0.0534522	-0.553493	-0.462386	0.137887	-1.01463	-0.258233	0.132951	-0.319928	-0.223256	-0.602672	-0.579406	-0.220791	-0.441367	1.42483
TCGA-BR-A4PF	TCGA-STAD	1.17	0	TMEcluster-C	-0.714741	-0.381611	-0.362579	-1.13363	-0.054965	0.312835	0.500125	0.0519797	-0.622048	-0.0534522	-0.819149	-0.181377	-0.829579	-0.355066	1.02591	2.03968	-0.319928	-0.726004	-0.0555093	-0.579406	-0.220791	2.31694	-0.926849
TCGA-BR-A4QL	TCGA-STAD	16.37	1	TMEcluster-C	-1.24077	0.206979	-0.442856	1.00998	-0.054965	-0.162891	0.692673	-0.756273	2.87812	-0.0534522	-1.42517	4.7592	-0.291787	-0.213245	-0.10822	-0.218119	0.854699	-0.726004	0.659094	-0.579406	-0.220791	-0.441367	-0.890821
TCGA-CD-5798	TCGA-STAD	13.6	0	TMEcluster-A	-1.06548	-0.381611	-0.442856	0.457968	-0.054965	-0.618751	-0.858063	-0.756273	2.66039	-0.0534522	-1.42517	1.97078	1.10408	-0.881528	-0.847402	2.89616	2.21291	0.0951283	-0.224436	0.258162	-0.220791	-0.318869	2.20098
TCGA-CD-5799	TCGA-STAD	13.2	0	TMEcluster-B	-0.317711	-0.381611	-0.392453	0.630114	-0.054965	-1.17508	-0.858063	0.112775	-0.299244	-0.0534522	-1.42517	1.20224	-0.829579	1.10354	-0.882648	1.37048	-0.319928	-0.726004	-0.697949	1.39498	-0.220791	0.528207	0.429459
TCGA-CD-5800	TCGA-STAD	13.33	0	TMEcluster-B	0.904812	-0.381611	-0.442856	-0.0848483	-0.054965	-1.19641	-0.744854	0.608572	1.38269	-0.0534522	-0.0639046	-0.462386	-0.829579	1.88754	-0.831032	-0.396973	-0.319928	-0.151968	-0.697949	-0.25551	-0.220791	-0.441367	-0.249697
TCGA-CD-5801	TCGA-STAD	13.37	1	TMEcluster-C	0.182164	-0.381611	-0.123768	2.99317	-0.054965	-0.755573	1.89249	-0.572254	0.644625	-0.0534522	0.66981	-0.462386	0.16326	-1.01463	0.233874	-0.501551	-0.277863	-0.389109	-0.569577	-0.579406	-0.220791	-0.441367	-0.607249
TCGA-CD-5803	TCGA-STAD	11.37	1	TMEcluster-C	0.281371	-0.381611	-0.442856	2.61189	-0.054965	-0.440641	0.420341	-0.30385	0.594804	-0.0534522	-0.485956	-0.462386	0.582902	-0.918961	0.804385	-0.14681	-0.26945	-0.0329448	-0.47248	-0.579406	-0.220791	-0.441367	1.75725
TCGA-CD-5804	TCGA-STAD	12.27	0	TMEcluster-A	0.879604	-0.381611	0.605561	-0.179309	-0.054965	-1.00257	-0.207064	-0.568892	0.164969	-0.0534522	-0.0164928	-0.462386	-0.344301	0.531849	0.00987362	0.687001	-0.319928	-0.726004	-0.372401	-0.579406	-0.220791	0.491836	1.03381
TCGA-CD-5813	TCGA-STAD	12.57	1	TMEcluster-A	0.896689	-0.381611	0.241331	0.905774	-0.054965	-1.26267	-0.647281	0.700229	1.35026	-0.0534522	-1.22821	-0.462386	1.12929	-0.795757	0.135653	1.37963	2.36842	-0.726004	-0.697949	-0.130131	-0.220791	-0.441367	1.28375
TCGA-CD-8524	TCGA-STAD	12.93	0	TMEcluster-A	1.66645	-0.381611	-0.442856	0.774249	-0.054965	-0.486263	-0.493993	-0.411198	1.722	-0.0534522	0.842317	-0.462386	-0.467937	-0.906341	0.472681	-0.0114497	0.098506	-0.623568	-0.697949	-0.0440574	-0.220791	-0.441367	0.317498
TCGA-CD-8525	TCGA-STAD	12.77	0	TMEcluster-C	-0.635989	0.651284	-0.442856	1.88439	-0.054965	-2.15934	1.04971	0.127176	2.03578	-0.0534522	-0.441334	0.0932123	-0.339984	0.633782	1.7587	-0.585821	-0.319928	-0.726004	-0.335028	-0.579406	-0.220791	-0.441367	-0.130383
TCGA-CD-8526	TCGA-STAD	12.7	0	TMEcluster-A	1.31714	-0.381611	-0.232733	0.0184931	-0.054965	0.282407	0.682687	0.727888	1.21994	-0.0534522	-1.39164	0.812557	0.430551	0.17515	-1.00141	-1.51676	-0.319928	0.898844	-0.202701	-0.579406	-0.220791	-0.441367	-0.507195
TCGA-CD-8527	TCGA-STAD	7.27	1	TMEcluster-C	0.257831	-0.381611	-0.442856	2.20146	-0.054965	-2.67552	1.16352	1.75225	1.80888	-0.0534522	-1.42517	2.14783	-0.164611	-0.553096	-0.644822	0.572339	-0.319928	1.84169	0.344838	-0.579406	-0.220791	-0.213565	-0.346678
TCGA-CD-8528	TCGA-STAD	12.5	0	TMEcluster-B	-0.852792	-0.381611	-0.442856	-1.15968	-0.054965	-0.290429	-0.858063	-0.756273	0.652262	-0.0534522	0.573034	-0.462386	-0.829579	1.15778	-0.111603	1.97338	-0.319928	-0.726004	-0.697949	-0.551044	-0.220791	1.71677	0.222405
TCGA-CD-8529	TCGA-STAD	12.47	0	TMEcluster-A	1.29415	-0.381611	2.93688	-0.70866	-0.054965	-0.583899	0.268204	-0.140801	0.0775544	-0.0534522	-0.283504	-0.462386	-0.303261	-0.0659621	-0.308045	0.186769	-0.319928	-0.619047	-0.129608	-0.579406	-0.220791	-0.441367	0.885626
TCGA-CD-8530	TCGA-STAD	12.57	0	TMEcluster-A	0.434467	-0.381611	-0.442856	-0.323401	-0.054965	-0.0532205	-0.858063	-0.756273	0.585425	-0.0534522	0.208743	-0.462386	-0.345008	-0.786922	-1.07571	0.670642	3.56391	0.367129	1.11832	1.79469	-0.220791	-0.441367	1.04243
TCGA-CD-8531	TCGA-STAD	12.77	0	TMEcluster-A	0.504609	5.70517	3.07691	-1.05292	-0.054965	-2.24438	-0.535582	3.07952	-0.300574	-0.0534522	-1.42517	-0.462386	-0.829579	-0.800355	-1.22606	-0.492564	-0.319928	3.93494	-0.653014	-0.579406	-0.220791	-0.441367	0.0153706
TCGA-CD-8532	TCGA-STAD	11.8	1	TMEcluster-A	-0.568018	-0.381611	0.263987	0.227133	-0.054965	1.26391	-0.431278	0.76955	1.26731	-0.0534522	-0.103086	-0.462386	-0.695375	-0.0684393	0.027562	-0.241093	-0.319928	-0.0642499	-0.697949	-0.226278	-0.220791	-0.441367	-0.106566
TCGA-CD-8533	TCGA-STAD	15.6	0	TMEcluster-A	1.33392	-0.381611	0.30314	-0.61206	-0.054965	0.184144	0.0178678	-0.756273	1.03413	-0.0534522	-0.70533	-0.462386	-0.237494	-0.554393	-0.506071	0.565087	1.93029	-0.726004	0.556219	-0.579406	-0.220791	-0.441367	-0.593979
TCGA-CD-8534	TCGA-STAD	12.23	0	TMEcluster-A	1.07981	-0.381611	-0.442856	-0.00446825	-0.054965	-0.187342	-0.804321	0.228798	-0.0571661	-0.0534522	-0.229358	-0.462386	-0.715611	-0.424179	0.58768	0.731131	-0.319928	-0.726004	1.20235	-0.579406	-0.220791	-0.441367	-0.627993
TCGA-CD-8535	TCGA-STAD	13	0	TMEcluster-C	-1.24077	-0.334413	-0.442856	-1.15968	-0.054965	-1.9787	-0.858063	-0.756273	1.32361	18.6548	-1.42517	0.367811	-0.829579	4.54414	0.0824014	-0.135683	-0.319928	-0.726004	0.600094	-0.579406	-0.220791	-0.441367	-0.579425
TCGA-CD-A486	TCGA-STAD	6.4	1	TMEcluster-B	-0.960662	-0.309975	-0.442856	-0.373555	-0.054965	-0.931018	-0.858063	0.624474	0.100972	-0.0534522	-0.695837	0.427109	-0.829579	2.79023	-1.22606	0.416186	-0.319928	-0.407828	-0.697949	1.03004	-0.220791	-0.441367	0.183625
TCGA-CD-A487	TCGA-STAD	12.47	0	TMEcluster-A	-1.13355	0.149125	-0.442856	-0.102929	-0.054965	-0.563225	-0.104823	-0.756273	0.165585	-0.0534522	-1.42517	3.35545	-0.829579	-0.919143	-1.13082	-0.257496	-0.319928	2.66563	3.77317	-0.579406	-0.220791	6.18415	0.930691
TCGA-CD-A489	TCGA-STAD	11.47	1	TMEcluster-A	1.48075	-0.381611	-0.442856	0.299597	-0.054965	0.532596	0.126264	-0.756273	-0.802319	-0.0534522	0.354613	-0.462386	0.156926	-0.964322	-0.748367	0.988276	-0.319928	-0.553195	-0.363247	-0.579406	-0.220791	-0.441367	0.877201
TCGA-CD-A48A	TCGA-STAD	12.6	0	TMEcluster-C	0.101844	-0.381611	-0.442856	-0.482257	-0.054965	-1.08392	-0.834937	0.784504	0.641854	-0.0534522	-0.802077	-0.462386	-0.829579	0.862677	0.153629	2.36632	-0.319928	-0.726004	-0.697949	-0.484623	-0.220791	-0.441367	-0.835554
TCGA-CD-A48C	TCGA-STAD	11.77	1	TMEcluster-C	-0.241431	-0.381611	-0.404142	-0.567779	-0.054965	0.0273836	0.0232838	0.714216	1.65319	-0.0534522	-0.966466	-0.325066	-0.227642	0.139262	0.960757	0.0181499	2.3651	-0.653804	-0.697949	0.927677	-0.220791	-0.441367	0.366287
TCGA-CD-A4MG	TCGA-STAD	6.67	1	TMEcluster-A	0.778377	-0.381611	-0.442856	-0.745203	-0.054965	0.645119	-0.858063	0.0274783	-0.802319	-0.0534522	-0.238115	-0.462386	-0.271195	0.147803	-0.323056	0.87431	-0.319928	-0.726004	-0.697949	0.643867	-0.220791	-0.355805	0.479494
TCGA-CD-A4MH	TCGA-STAD	12.37	0	TMEcluster-A	1.76174	-0.381611	6.48679	0.092315	-0.054965	-0.187843	-0.850354	0.250264	-0.802319	-0.0534522	-1.42517	1.4838	0.0457302	-1.01463	-0.319794	-0.781971	-0.319928	-0.726004	-0.320905	-0.579406	-0.220791	-0.441367	-0.518193
TCGA-CG-4301	TCGA-STAD	3.07	0	TMEcluster-A	0.160642	-0.381611	-0.175334	-1.15968	-0.054965	0.341879	-0.609598	-0.205475	-0.802319	-0.0534522	-0.103144	-0.462386	-0.796589	-0.0773061	-0.626791	2.11725	0.71788	0.494728	0.0724369	-0.341472	-0.0639652	-0.296982	0.262474
TCGA-CG-4305	TCGA-STAD	16.17	0	TMEcluster-C	-0.0809684	-0.381611	-0.442856	0.423442	-0.054965	0.103102	1.09846	-0.756273	-0.802319	-0.0534522	0.595415	-0.462386	-0.438801	-0.218225	0.287789	0.836753	-0.145701	-0.726004	-0.321606	-0.579406	-0.220791	0.0343564	0.278004
TCGA-CG-4306	TCGA-STAD	1.03	1	TMEcluster-B	-0.530384	-0.381611	0.570357	-1.15968	-0.054965	0.784228	-0.120081	-0.756273	-0.802319	-0.0534522	1.37256	-0.462386	-0.198838	-0.281274	-0.620032	0.132022	-0.319928	0.386218	-0.697949	2.21499	-0.220791	1.61514	0.298076
TCGA-CG-4436	TCGA-STAD	8.1	0	TMEcluster-B	-0.655909	-0.381611	-0.337809	-1.15968	-0.054965	0.347439	0.585963	-0.756273	-0.802319	-0.0534522	-0.987712	-0.369084	-0.801302	0.33649	0.20763	-0.176611	-0.319928	-0.726004	-0.697949	1.88728	8.09057	4.32346	-1.24815
TCGA-CG-4437	TCGA-STAD	8.17	0	TMEcluster-C	0.0372407	-0.381611	-0.442856	0.696729	-0.054965	-0.741994	0.65736	0.312993	0.515281	-0.0534522	0.730698	-0.38043	-0.620717	0.0223057	-0.0999997	0.650826	-0.319928	-0.645732	-0.449609	-0.579406	-0.220791	0.702868	0.658859
TCGA-CG-4438	TCGA-STAD	54.83	0	TMEcluster-C	-0.969491	-0.381611	-0.334188	-0.712726	-0.054965	0.25913	0.71416	1.3851	-0.692338	-0.0534522	-1.42517	0.886896	0.461619	-0.48323	1.54607	0.926995	-0.0952904	-0.726004	1.64361	-0.579406	4.44578	-0.441367	-0.676366
TCGA-CG-4440	TCGA-STAD	4.07	1	TMEcluster-B	-1.19683	0.0376742	-0.442856	-1.15968	-0.054965	0.215116	-0.104558	-0.756273	-0.802319	-0.0534522	0.647285	-0.462386	-0.829579	-0.52826	0.26174	2.18567	-0.319928	-0.0321533	0.334202	-0.579406	-0.220791	4.0727	-0.484357
TCGA-CG-4441	TCGA-STAD	14.2	1	TMEcluster-B	-0.169316	-0.381611	-0.0471938	-0.963842	-0.054965	-0.590501	-0.858063	-0.756273	0.384312	-0.0534522	-0.613386	0.287348	-0.829579	0.867613	0.62257	0.407863	-0.319928	-0.726004	-0.697949	1.534	-0.220791	2.3058	0.790297
TCGA-CG-4443	TCGA-STAD	30.4	0	TMEcluster-A	-1.24077	-0.381611	-0.442856	-0.571784	-0.054965	1.16897	-0.731626	0.056142	-0.802319	-0.0534522	0.504679	-0.462386	5.63089	-0.239088	-1.22606	1.71889	-0.319928	-0.726004	-0.156098	-0.579406	0.125802	-0.441367	-1.57651
TCGA-CG-4444	TCGA-STAD	47.7	0	TMEcluster-B	0.168567	-0.381611	-0.128894	-0.895867	-0.054965	0.22694	0.804804	-0.756273	-0.802319	-0.0534522	0.966014	-0.462386	0.233105	-0.3634	-0.270088	1.13947	-0.303102	-0.546191	-0.697949	0.295664	-0.220791	0.875656	-0.167899
TCGA-CG-4460	TCGA-STAD	22.3	1	TMEcluster-A	0.584511	-0.381611	0.353743	-0.966839	-0.054965	0.169472	-0.77207	-0.756273	-0.802319	-0.0534522	0.0447972	-0.462386	-0.585975	-0.386746	1.07551	1.29671	-0.319928	-0.726004	-0.697949	0.611267	4.33525	-0.186855	-0.539253
TCGA-CG-4465	TCGA-STAD	9.13	1	TMEcluster-A	-0.652966	-0.381611	-0.365307	-1.03096	-0.054965	-0.266668	-0.386891	-0.472445	-0.104926	-0.0534522	-0.84314	0.446193	-0.829579	-0.620544	0.626084	3.55917	0.026252	-0.726004	-0.208784	-0.579406	-0.220791	2.01794	0.194344
TCGA-CG-4466	TCGA-STAD	19.23	0	TMEcluster-B	-0.559441	-0.381611	-0.201656	-1.15968	-0.054965	1.2907	1.37343	-0.756273	-0.802319	-0.0534522	2.44043	-0.462386	-0.829579	-0.208934	0.513902	-0.453966	-0.319928	-0.563559	-0.697949	-0.218552	-0.220791	2.02433	-1.78959
TCGA-CG-4469	TCGA-STAD	7.17	1	TMEcluster-B	-1.24077	-0.369661	-0.442856	-1.02835	-0.054965	-0.726522	-0.268973	-0.756273	-0.802319	-0.0534522	0.867668	-0.462386	-0.0263275	-0.21685	-0.745268	2.16427	-0.319928	1.20005	-0.697949	3.07141	-0.220791	2.36765	-1.12906
TCGA-CG-4475	TCGA-STAD	23.3	0	TMEcluster-B	-0.735658	-0.381611	-0.20874	-1.15968	-0.054965	0.443939	-0.730043	-0.756273	-0.802319	-0.0534522	0.885712	-0.462386	0.192446	0.126685	-1.22606	0.540073	-0.319928	1.35818	-0.697949	2.35377	0.363838	2.33412	0.795894
TCGA-CG-4477	TCGA-STAD	31.4	0	TMEcluster-B	-0.710674	-0.381611	-0.420648	-0.811957	-0.054965	0.496652	1.01567	-0.756273	-0.802319	-0.0534522	1.08206	-0.462386	-0.815441	-0.608276	1.00571	0.215293	-0.319928	3.16654	-0.304405	-0.579406	-0.220791	1.36218	-0.424154
TCGA-CG-5717	TCGA-STAD	7.07	1	TMEcluster-A	0.130013	0.525876	-0.442856	-1.15968	-0.054965	0.656962	-0.365493	0.764604	-0.608211	-0.0534522	1.33313	-0.462386	2.81609	-0.88973	0.483781	-1.32043	0.149116	0.566328	2.63458	-0.579406	-0.220791	-0.00579002	-0.430289
TCGA-CG-5718	TCGA-STAD	36.5	1	TMEcluster-B	-0.719352	-0.381611	-0.442856	-0.400998	-0.054965	0.130043	-0.162748	-0.171116	1.1934	-0.0534522	0.200044	-0.462386	-0.764419	0.107054	0.23372	0.744646	-0.319928	-0.726004	0.0921338	-0.579406	-0.220791	2.73299	-0.15652
TCGA-CG-5719	TCGA-STAD	1.03	0	TMEcluster-B	-0.731162	-0.381611	1.94575	-0.975931	-0.054965	-0.424502	-0.858063	-0.756273	1.34759	-0.0534522	-0.0326709	-0.462386	0.180618	1.91532	-0.894469	0.196811	-0.319928	-0.140132	-0.204786	-0.579406	-0.220791	-0.127403	1.67889
TCGA-CG-5720	TCGA-STAD	1	1	TMEcluster-B	0.0130773	-0.381611	-0.439684	0.0289667	-0.054965	-0.458541	-0.277556	-0.756273	-0.261444	-0.0534522	0.47651	-0.462386	1.41901	0.454191	-0.55041	-0.529202	-0.319928	0.267406	-0.692265	1.49095	-0.220791	1.97794	0.453333
TCGA-CG-5721	TCGA-STAD	6.1	0	TMEcluster-C	-0.934556	-0.266225	-0.442856	2.07493	-0.054965	-1.99297	4.27827	-0.70588	-0.802319	-0.0534522	1.52436	-0.462386	0.0129232	-0.550862	1.96173	-0.0519509	-0.319928	-0.66793	0.397664	-0.579406	-0.220791	-0.441367	0.0712513
TCGA-CG-5722	TCGA-STAD	1	0	TMEcluster-C	0.242903	-0.381611	0.562075	1.81873	-0.054965	0.445582	0.586598	0.38245	-0.00877019	-0.0534522	0.300694	0.729594	0.755227	-0.70202	-0.406257	-1.53945	-0.319928	-0.191194	0.367808	-0.579406	-0.220791	-0.421748	-0.173011
TCGA-CG-5723	TCGA-STAD	106.53	0	TMEcluster-C	-0.903282	-0.381611	-0.442856	1.44009	-0.054965	-1.59041	3.60497	-0.756273	-0.802319	-0.0534522	-0.152692	-0.462386	0.309435	-0.523488	1.67895	0.673961	-0.319928	0.280537	-0.697949	0.154968	-0.220791	0.223394	-0.114026
TCGA-CG-5724	TCGA-STAD	12.2	1	TMEcluster-C	-1.11048	0.220843	-0.442856	0.126009	-0.054965	-1.22956	0.0769646	-0.733583	0.374632	-0.0534522	0.0832735	-0.462386	1.49931	0.475201	1.74476	1.19429	-0.319928	-0.368204	-0.697949	-0.579406	-0.220791	0.538152	0.446127
TCGA-CG-5725	TCGA-STAD	15.23	1	TMEcluster-C	0.046875	-0.381611	-0.313075	1.53444	-0.054965	-1.40136	-0.32727	-0.756273	0.653369	-0.0534522	-0.677646	-0.462386	-0.829579	1.27708	0.442405	0.381947	-0.319928	-0.585441	-0.697949	-0.404112	-0.220791	-0.441367	-0.82818
TCGA-CG-5726	TCGA-STAD	29.37	1	TMEcluster-B	-0.543051	-0.381611	-0.107342	-0.167832	-0.054965	1.2877	-0.599632	-0.756273	0.149965	-0.0534522	-0.502235	-0.462386	1.13408	0.31795	-0.180177	-0.482428	0.758808	-0.342805	-0.697949	1.26006	-0.220791	-0.441367	-1.06737
TCGA-CG-5732	TCGA-STAD	70	1	TMEcluster-B	-0.376188	1.09337	1.72339	1.00162	-0.054965	-0.0290881	-0.773531	-0.332316	1.28415	-0.0534522	0.176692	-0.462386	-0.660861	-0.447174	-0.75988	-0.370825	-0.319928	-0.267964	-0.697949	0.89734	-0.220791	-0.109922	-0.945282
TCGA-CG-5734	TCGA-STAD	8.1	1	TMEcluster-B	0.0957336	-0.381611	1.09891	-0.0091916	-0.054965	-0.351912	0.423554	-0.747197	0.596586	-0.0534522	1.21631	-0.462386	-0.829579	0.833745	-0.718155	-1.13356	-0.319928	-0.347341	-0.697949	1.65505	-0.220791	-0.441367	-0.23885
TCGA-D7-5577	TCGA-STAD	26.07	1	TMEcluster-C	0.0551785	-0.381611	-0.325822	0.389121	-0.054965	-0.248944	0.271882	-0.188678	0.900232	-0.0534522	-0.129675	-0.193703	0.114071	-0.782147	2.13017	0.358482	1.4774	-0.726004	-0.10266	-0.579406	-0.220791	-0.441367	-0.301598
TCGA-D7-5578	TCGA-STAD	12.83	0	TMEcluster-A	-0.22326	-0.381611	0.780212	0.884476	-0.054965	-0.406897	-0.444257	-0.312267	0.763551	-0.0534522	0.664689	-0.462386	1.50603	-0.124084	-0.334607	0.0744606	0.187973	0.0698134	-0.697949	0.244878	-0.220791	-0.441367	0.559003
TCGA-D7-6519	TCGA-STAD	20.83	0	TMEcluster-A	-1.20076	-0.203614	-0.442856	1.4149	-0.054965	-1.14563	-0.858063	0.632252	2.08568	-0.0534522	-0.325622	4.29169	0.845657	-0.793516	-0.482603	1.02972	-0.319928	-0.559381	2.70497	-0.579406	-0.220791	-0.441367	0.0501172
TCGA-D7-6520	TCGA-STAD	19.1	0	TMEcluster-A	0.115874	-0.381611	-0.400383	-0.5603	-0.054965	-0.139831	-0.521896	1.5077	1.09792	-0.0534522	-0.0796859	-0.462386	0.20787	-0.0963033	1.19796	0.504752	-0.319928	-0.582888	0.238102	-0.579406	-0.220791	-0.441367	0.949344
TCGA-D7-6521	TCGA-STAD	18.8	0	TMEcluster-A	1.14207	-0.381611	-0.442856	-0.204333	-0.054965	0.0527132	0.721315	0.0869845	-0.594312	-0.0534522	0.177699	-0.462386	1.47023	-0.37127	-0.484952	-0.200499	-0.319928	-0.726004	1.15075	-0.579406	0.183092	-0.441367	0.966227
TCGA-D7-6522	TCGA-STAD	18.87	0	TMEcluster-A	0.424816	0.935393	-0.375282	0.629312	-0.054965	-2.00901	-0.250443	0.677424	4.34762	-0.0534522	-1.42517	-0.136073	0.148645	-0.220545	-0.376853	0.913368	1.02572	-0.726004	0.334389	-0.579406	-0.220791	-0.441367	1.6999
TCGA-D7-6524	TCGA-STAD	18.1	0	TMEcluster-B	-0.740805	-0.381611	-0.442856	-1.15968	-0.054965	-0.0566057	-0.62005	-0.756273	-0.387677	-0.0534522	0.726727	-0.462386	0.202825	0.478149	-1.1111	-0.582413	1.31917	0.540786	-0.697949	3.65296	-0.220791	4.04709	1.72685
TCGA-D7-6525	TCGA-STAD	13.53	1	TMEcluster-A	0.823537	-0.381611	0.234059	-1.06869	-0.054965	-0.932111	-0.858063	-0.756273	1.74501	-0.0534522	-1.03455	1.05649	-0.708297	0.155478	-0.958212	2.16427	-0.319928	0.329336	0.160806	-0.579406	-0.220791	-0.0501453	0.954848
TCGA-D7-6526	TCGA-STAD	17.43	0	TMEcluster-B	0.431301	-0.381611	-0.192556	-1.15968	-0.054965	0.196289	-0.858063	-0.756273	1.84313	-0.0534522	1.24801	-0.462386	-0.829579	0.0420561	-1.20629	0.236809	-0.319928	0.135889	-0.697949	0.999153	-0.220791	2.14962	-0.419444
TCGA-D7-6527	TCGA-STAD	10.4	1	TMEcluster-B	1.22683	-0.381611	3.93379	-0.315082	-0.054965	-0.813167	0.478101	-0.756273	-0.104556	-0.0534522	-0.144802	-0.462386	-0.829579	0.187122	-0.630176	-1.11977	-0.319928	-0.125888	-0.278175	-0.0330168	-0.220791	1.3255	0.29009
TCGA-D7-6528	TCGA-STAD	15.43	0	TMEcluster-B	-0.55564	-0.381611	-0.442856	-1.15968	-0.054965	-0.219926	-0.211287	-0.390113	-0.47874	-0.0534522	2.74185	-0.462386	-0.829579	2.17466	-0.177319	-1.18658	-0.319928	-0.307199	-0.697949	1.48339	-0.220791	-0.441367	-0.61776
TCGA-D7-6815	TCGA-STAD	16.2	0	TMEcluster-B	-0.281335	-0.381611	0.869829	-0.777109	-0.054965	0.118004	-0.449409	-0.756273	-0.0626898	-0.0534522	0.414773	-0.462386	-0.829579	1.40643	0.235882	0.143083	-0.319928	-0.468599	-0.589746	-0.579406	-0.220791	-0.358966	0.000420545
TCGA-D7-6818	TCGA-STAD	12.53	1	TMEcluster-A	-0.813061	-0.381611	-0.442856	-0.765241	-0.054965	0.354206	-0.858063	-0.449471	-0.754983	-0.0534522	-1.42517	1.67813	3.81049	-0.0818104	-1.01788	1.11018	1.35905	-0.726004	2.35792	-0.579406	-0.220791	1.01405	1.44988
TCGA-D7-6822	TCGA-STAD	12.5	0	TMEcluster-B	-0.495811	-0.381611	-0.411131	0.885398	-0.054965	-0.556988	-0.300171	-0.756273	-0.802319	-0.0534522	0.799681	-0.462386	-0.439188	0.112952	0.307709	-0.552924	-0.319928	3.11128	-0.697949	-0.579406	-0.220791	3.335	-0.311838
TCGA-D7-8570	TCGA-STAD	25.07	0	TMEcluster-A	0.316382	-0.381611	2.00376	-0.935513	-0.054965	-0.700483	0.352735	0.51318	0.767644	-0.0534522	-0.810211	1.05668	-0.00205456	0.0655196	0.0770866	0.218865	2.54928	-0.726004	0.307431	-0.579406	-0.220791	-0.441367	0.453157
TCGA-D7-8572	TCGA-STAD	17.03	0	TMEcluster-B	-0.364969	-0.381611	-0.442856	-0.571828	-0.054965	-1.92873	-0.858063	-0.645768	0.336662	-0.0534522	-0.105235	-0.0922063	-0.829579	3.22269	-0.603674	0.130179	-0.319928	-0.70572	-0.697949	1.37785	-0.220791	0.0569225	0.856603
TCGA-D7-8573	TCGA-STAD	19.77	0	TMEcluster-B	0.462126	-0.381611	-0.381429	-0.427962	-0.054965	0.312912	0.242637	-0.263425	0.226229	-0.0534522	0.534443	-0.462386	-0.829579	-0.210299	1.06721	-0.196605	-0.319928	0.568574	-0.697949	-0.579406	-0.220791	0.64861	-1.17513
TCGA-D7-8574	TCGA-STAD	17.43	0	TMEcluster-A	-0.367633	7.87712	-0.442856	0.598359	-0.054965	-0.878396	-0.445844	0.0306648	-0.28779	-0.0534522	-1.14679	-0.462386	-0.393503	-0.902586	-0.776267	-0.450338	-0.319928	-0.320169	-0.510157	-0.579406	-0.220791	-0.441367	0.844748
TCGA-D7-8575	TCGA-STAD	18.47	1	TMEcluster-B	0.148491	-0.381611	0.946123	-1.15968	-0.054965	-1.67387	-0.598705	-0.756273	-0.0452083	-0.0534522	-0.199691	-0.462386	-0.829579	3.76222	-1.22606	-0.677593	-0.319928	-0.321868	-0.697949	0.715454	-0.220791	-0.441367	-1.20404
TCGA-D7-8576	TCGA-STAD	14.87	1	TMEcluster-A	-0.567016	-0.216011	0.246115	-1.15968	-0.054965	-0.74753	-0.858063	-0.756273	-0.802319	-0.0534522	-0.608648	-0.462386	-0.796589	0.228547	-0.0356988	2.47631	0.446396	1.29464	2.01886	-0.579406	-0.220791	-0.035468	-0.205423
TCGA-D7-8578	TCGA-STAD	21.43	0	TMEcluster-A	0.326877	-0.381611	-0.442856	-0.164937	-0.054965	0.763085	-0.858063	-0.333634	1.11433	-0.0534522	-0.272256	-0.462386	-0.217264	-0.690711	-0.775303	1.07702	-0.319928	0.780683	-0.697949	0.68291	-0.220791	-0.441367	1.68386
TCGA-D7-8579	TCGA-STAD	21.2	0	TMEcluster-A	-0.51368	0.912998	-0.442856	-0.765114	-0.054965	0.528324	-0.424901	-0.756273	-0.802319	-0.0534522	0.315527	-0.462386	2.54207	-1.01463	-0.987842	0.518977	-0.319928	-0.125019	2.40642	0.26932	3.49076	0.924751	0.996616
TCGA-D7-A4YU	TCGA-STAD	16.67	0	TMEcluster-C	0.432945	-0.381611	-0.350058	-0.186264	-0.054965	0.280861	0.203299	-0.214364	0.511804	-0.0534522	-0.106935	-0.462386	0.231194	-0.455786	2.10525	-0.471142	-0.319928	-0.415925	0.357421	-0.579406	-0.220791	-0.441367	-0.158955
TCGA-D7-A4YX	TCGA-STAD	36.93	0	TMEcluster-C	-0.458427	-0.381611	-0.328327	1.28094	-0.054965	-1.29748	0.813152	1.94002	0.63948	-0.0534522	0.281319	-0.462386	-0.829579	-0.76061	3.17604	0.06269	-0.319928	-0.311067	0.243856	-0.579406	-0.220791	-0.413901	-0.954496
TCGA-D7-A4Z0	TCGA-STAD	14.97	0	TMEcluster-B	1.41558	-0.287415	-0.442856	-1.12613	-0.054965	1.03934	-0.00297024	-0.756273	-0.802319	-0.0534522	1.39063	-0.462386	-0.000316405	-0.34768	-0.933783	-0.750991	-0.319928	0.713749	-0.264027	0.914319	-0.220791	-0.441367	0.490103
TCGA-D7-A6EV	TCGA-STAD	11.4	0	TMEcluster-B	0.0312208	-0.381611	-0.011236	0.246544	-0.054965	0.0697371	1.60942	0.617156	-0.802319	-0.0534522	-1.42517	-0.462386	0.684517	-1.01463	-1.22606	-1.11226	-0.319928	1.21799	-0.697949	5.34412	1.75641	0.425521	-0.694985
TCGA-D7-A6EX	TCGA-STAD	2.87	0	TMEcluster-A	1.07492	-0.381611	-0.442856	-0.290803	-0.054965	0.575447	-0.858063	1.04965	1.92632	-0.0534522	-0.373172	-0.173985	0.967196	-0.939218	-0.108442	-0.0599868	-0.319928	-0.726004	1.06669	-0.579406	-0.220791	-0.441367	-0.139751
TCGA-D7-A6EY	TCGA-STAD	11.6	1	TMEcluster-C	1.86119	-0.381611	-0.141181	0.171762	-0.054965	-0.415482	-0.045189	0.844047	0.246391	-0.0534522	0.509855	-0.462386	-0.566203	-0.452809	0.4183	-0.373996	-0.319928	-0.281374	-0.697949	-0.579406	-0.220791	-0.107412	0.122077
TCGA-D7-A6EZ	TCGA-STAD	20.6	1	TMEcluster-C	-0.855973	-0.381611	-0.404547	0.511006	-0.054965	-1.3625	1.45676	-0.277311	-0.514643	-0.0534522	1.21923	-0.462386	-0.688315	0.266038	2.26155	0.619506	-0.319928	-0.671549	-0.697949	0.541662	-0.220791	-0.441367	0.0744781
TCGA-D7-A6F0	TCGA-STAD	22.6	0	TMEcluster-C	-0.447805	-0.381611	0.0987797	-0.689229	-0.054965	-0.113642	0.211282	1.04419	1.06563	-0.0534522	-0.783658	0.553617	0.108576	0.205532	0.440902	0.978927	-0.319928	-0.726004	0.0443543	-0.579406	-0.220791	-0.441367	-0.842288
TCGA-D7-A6F2	TCGA-STAD	15.87	0	TMEcluster-B	-0.188094	-0.381611	-0.194501	-0.095741	-0.054965	1.1478	-0.726332	-0.756273	1.19037	-0.0534522	0.933784	-0.462386	-0.34565	0.168492	-0.496539	0.409649	-0.319928	-0.726004	-0.697949	-0.527965	-0.220791	-0.433519	-0.566605
TCGA-D7-A747	TCGA-STAD	8.5	1	TMEcluster-A	1.46312	0.594872	-0.442856	-0.0176795	-0.054965	0.820476	-0.464805	-0.733583	0.732828	-0.0534522	-0.731263	-0.462386	-0.216909	-1.01463	-0.481501	-0.227269	-0.319928	-0.00899106	0.869175	-0.579406	-0.220791	-0.441367	1.20727
TCGA-D7-A748	TCGA-STAD	4.4	1	TMEcluster-A	-0.548393	-0.381611	-0.442856	-0.812786	-0.054965	-1.43093	-0.766149	-0.513828	0.528664	-0.0534522	-1.25488	-0.462386	-0.829579	0.791774	-0.227261	3.0848	2.09957	-0.661515	0.344456	-0.579406	-0.220791	1.68308	1.21238
TCGA-D7-A74A	TCGA-STAD	20.23	0	TMEcluster-C	-0.950585	0.447593	-0.442856	2.00188	-0.054965	0.201221	2.16479	2.0761	-0.802319	-0.0534522	-1.42517	2.146	1.75045	-0.753303	-0.85738	-1.0854	-0.319928	1.59206	-0.675216	-0.579406	0.139294	-0.441367	-1.71253
TCGA-EQ-8122	TCGA-STAD	8.1	1	TMEcluster-B	-1.24077	0.208936	-0.442856	-1.15968	-0.054965	0.791187	-0.858063	0.654018	-0.802319	-0.0534522	-0.252134	1.67577	2.81671	2.62923	-1.07151	-1.57424	-0.319928	-0.726004	-0.697949	0.346696	-0.220791	-0.441367	0.388042
TCGA-F1-6874	TCGA-STAD	14.67	0	TMEcluster-B	-1.23712	-0.357616	-0.442856	-1.15968	-0.054965	-0.131509	0.0137621	-0.756273	-0.802319	-0.0534522	2.07096	-0.462386	-0.829579	2.61503	0.144581	-0.644401	-0.319928	-0.726004	-0.697949	0.0953222	-0.220791	1.00716	0.334383
TCGA-F1-6875	TCGA-STAD	73.23	1	TMEcluster-B	-1.10246	0.192917	-0.442856	0.0606643	0.480623	-1.64957	-0.550883	-0.756273	0.39999	-0.0534522	0.741248	-0.462386	-0.829579	4.02867	-1.22386	-1.68381	-0.319928	-0.726004	-0.697949	1.94899	-0.220791	-0.121802	-0.912098
TCGA-F1-A448	TCGA-STAD	21.57	0	TMEcluster-B	0.789254	-0.381611	1.87844	-1.15968	-0.054965	-0.551197	-0.68878	-0.756273	-0.802319	-0.0534522	-0.192791	-0.462386	-0.829579	0.860215	-1.22606	-0.356615	-0.319928	-0.0022193	-0.697949	2.64004	-0.220791	1.31074	0.44514
TCGA-F1-A72C	TCGA-STAD	11.53	0	TMEcluster-A	0.251419	-0.381611	-0.112779	0.459137	-0.054965	0.316576	-0.381442	0.955159	-0.437826	-0.0534522	-1.42517	3.31991	-0.0754517	-0.45093	0.291544	0.190323	-0.319928	-0.341604	0.0459705	-0.579406	-0.220791	-0.441367	0.474385
TCGA-FP-7735	TCGA-STAD	3.53	1	TMEcluster-A	-0.257011	0.91162	-0.442856	0.864886	-0.054965	-0.654906	-0.638548	-0.756273	1.66766	-0.0534522	-1.42517	1.11915	0.179628	0.218558	-0.24591	0.602588	-0.319928	-0.698959	0.328406	-0.579406	-0.220791	-0.441367	0.28916
TCGA-FP-7829	TCGA-STAD	19.8	0	TMEcluster-B	-1.05413	0.342426	-0.442856	-1.10356	-0.054965	0.711301	-0.858063	0.474856	-0.802319	-0.0534522	0.100863	-0.42562	3.31056	2.34888	-0.991809	-1.41711	0.285363	-0.726004	-0.697949	0.639282	-0.220791	-0.441367	0.666869
TCGA-FP-7916	TCGA-STAD	14.27	1	TMEcluster-C	0.324527	-0.381611	-0.112004	0.567568	-0.054965	0.0639032	0.0809769	-0.756273	-0.188107	-0.0534522	-0.0259052	-0.462386	-0.0017757	-0.717833	2.32165	-0.393232	-0.319928	-0.421802	1.00183	-0.579406	-0.220791	-0.441367	0.260934
TCGA-FP-7998	TCGA-STAD	22.6	0	TMEcluster-C	0.20873	-0.381611	0.0363131	0.128297	-0.054965	-0.325566	0.833762	-0.0911281	-0.394874	-0.0534522	-1.07838	-0.348279	-0.00369653	-0.238457	2.40419	-0.331346	-0.319928	-0.622412	1.15905	-0.579406	-0.220791	-0.441367	0.592034
TCGA-FP-8099	TCGA-STAD	17.3	0	TMEcluster-A	-0.318896	-0.381611	-0.207228	-0.72654	-0.054965	0.00824927	-0.858063	0.203964	2.6058	-0.0534522	-1.29099	4.27507	2.24898	0.737894	-1.09175	-0.697969	-0.319928	1.38971	-0.221273	-0.579406	-0.220791	-0.441367	0.0631111
TCGA-FP-8209	TCGA-STAD	60.37	1	TMEcluster-A	2.31916	0.349719	-0.442856	0.0290553	-0.054965	0.0831154	-0.227812	-0.756273	-0.802319	-0.0534522	-1.02012	-0.462386	-0.426459	-0.936913	-0.448967	0.257274	-0.319928	0.169171	0.767557	-0.579406	-0.220791	-0.441367	1.35365
TCGA-FP-8210	TCGA-STAD	5.1	1	TMEcluster-A	2.20718	1.13663	-0.442856	1.48586	-0.054965	-1.36372	-0.482458	0.515307	0.758752	-0.0534522	-1.18028	-0.462386	-0.354618	-0.954187	-1.22606	-0.348878	-0.319928	1.7379	0.420249	-0.579406	-0.220791	-0.336034	1.27825
TCGA-FP-8211	TCGA-STAD	13.77	0	TMEcluster-A	1.42311	-0.381611	-0.0454028	-0.049893	-0.054965	2.01702	-0.858063	-0.475775	1.31207	-0.0534522	-1.42517	1.12207	0.270846	-0.605423	-0.646944	-1.24352	-0.319928	-0.0554249	-0.692265	-0.342743	-0.220791	-0.441367	-1.02481
TCGA-FP-8631	TCGA-STAD	0.57	0	TMEcluster-A	0.0676431	-0.381611	0.0106007	-1.15968	-0.054965	0.505973	-0.858063	-0.756273	-0.802319	-0.0534522	-0.768521	-0.38951	-0.740853	-0.0720789	-1.01478	1.15971	-0.319928	4.05391	1.18066	-0.579406	-0.220791	-0.441367	0.082333
TCGA-FP-A4BF	TCGA-STAD	5.6	1	TMEcluster-C	-0.407893	-0.381611	-0.261084	1.36206	-0.054965	-1.02688	1.75401	-0.30133	-0.713934	-0.0534522	-1.10072	2.39985	-0.335166	-0.810205	0.596143	0.977234	1.5447	-0.726004	1.17609	-0.579406	-0.220791	-0.441367	0.843265
TCGA-FP-A8CX	TCGA-STAD	0.23	0	TMEcluster-B	-1.16237	0.433423	1.81118	-0.00675285	-0.054965	0.726677	-0.0938824	-0.756273	-0.571913	-0.0534522	0.0486776	-0.462386	-0.829579	0.488389	-0.758964	0.319797	-0.319928	-0.0788744	-0.697949	0.174617	-0.220791	-0.237089	-0.607584
TCGA-FP-A9TM	TCGA-STAD	6.3	0	TMEcluster-A	2.24376	6.32068	-0.317055	-0.897837	-0.054965	-0.794844	-0.730392	-0.454876	-0.802319	-0.0534522	0.109742	-0.462386	-0.787163	-0.746266	-0.762472	-1.26954	-0.319928	-0.340493	-0.697949	-0.481404	-0.220791	-0.441367	-1.65164
TCGA-HF-7132	TCGA-STAD	78.37	0	TMEcluster-A	-1.03617	2.75299	-0.442856	1.35868	-0.054965	0.483724	-0.167811	-0.756273	-0.590272	-0.0534522	-0.517583	-0.462386	-0.627425	-0.303261	-0.240921	0.147517	-0.319928	-0.438862	-0.237727	-0.579406	-0.220791	-0.441367	0.305232
TCGA-HF-7133	TCGA-STAD	63.93	0	TMEcluster-A	-0.598433	-0.381611	-0.442856	-0.398245	-0.054965	-0.209918	-0.259498	0.0425151	-0.620446	-0.0534522	-1.42517	2.72351	-0.829579	0.817497	-0.570789	1.15222	-0.319928	-0.457722	0.79426	-0.579406	-0.220791	0.902344	0.0417389
TCGA-HF-7134	TCGA-STAD	52.93	0	TMEcluster-B	-0.185555	-0.381611	2.63049	-1.1581	-0.054965	0.527568	-0.643481	-0.756273	-0.802319	-0.0534522	0.824774	-0.462386	-0.0269021	0.812769	-0.457121	-0.904808	-0.319928	-0.487529	-0.697949	1.5822	-0.220791	0.384322	-0.548563
TCGA-HF-A5NB	TCGA-STAD	30.93	0	TMEcluster-C	-1.04897	-0.381611	-0.442856	0.626241	-0.054965	0.673116	0.386129	1.10203	0.922953	-0.0534522	-0.300728	-0.462386	-0.529129	-0.619219	0.035931	0.113232	6.21929	-0.726004	-0.697949	0.69435	-0.220791	-0.441367	-1.12021
TCGA-HJ-7597	TCGA-STAD	26.83	1	TMEcluster-C	-0.954833	1.48577	-0.439684	2.0172	-0.054965	-2.59142	1.40893	-0.387647	2.04627	-0.0534522	-0.840649	3.39652	-0.771606	-0.511527	3.45453	-1.25955	-0.319928	-0.726004	1.46335	-0.579406	-0.220791	-0.218347	-1.0712
TCGA-HU-8238	TCGA-STAD	1.53	0	TMEcluster-A	-0.116093	0.161768	-0.442856	-0.29984	-0.054965	-0.40568	-0.858063	0.248653	-0.385779	-0.0534522	-0.869028	-0.409863	-0.621377	-0.111698	-0.337754	-0.0813077	-0.319928	1.21905	4.23186	0.289553	-0.220791	-0.0269673	-0.641593
TCGA-HU-8244	TCGA-STAD	24.73	0	TMEcluster-B	-0.784313	-0.381611	-0.442856	-1.15178	-0.054965	2.12034	-0.858063	-0.756273	-0.0723405	-0.0534522	1.6608	-0.462386	-0.829579	-0.101165	-0.967532	0.585969	-0.319928	-0.184143	-0.697949	1.62302	-0.220791	-0.441367	-2.88447
TCGA-HU-8249	TCGA-STAD	29.37	0	TMEcluster-C	-0.13248	-0.381611	-0.442856	-0.91163	-0.054965	-1.62053	6.99586	-0.756273	-0.802319	-0.0534522	2.51385	-0.462386	-0.210966	0.98063	-0.153901	-1.68381	-0.319928	-0.726004	-0.697949	1.05616	-0.220791	-0.441367	-1.08226
TCGA-HU-8602	TCGA-STAD	22.63	0	TMEcluster-B	-0.877626	-0.381611	-0.113055	-0.999861	-0.054965	-0.671997	0.44944	-0.756273	-0.802319	-0.0534522	1.25536	-0.462386	-0.829579	2.07362	0.373298	-0.252381	-0.319928	0.636572	-0.697949	0.0726382	-0.220791	0.473112	-0.113769
TCGA-HU-8604	TCGA-STAD	23.13	0	TMEcluster-C	-0.492467	-0.381611	0.155033	0.17664	-0.054965	-0.0428628	0.822974	1.44341	0.258572	-0.0534522	1.92394	-0.462386	-0.829579	0.430257	0.128269	-0.479266	-0.319928	-0.726004	-0.697949	-0.528337	-0.220791	-0.0361098	0.592113
TCGA-HU-8608	TCGA-STAD	21.37	0	TMEcluster-C	0.557369	-0.381611	3.99876	-0.7001	-0.054965	-1.19129	0.42744	2.09945	-0.802319	-0.0534522	-0.0258779	-0.462386	-0.829579	-0.725828	2.74416	-0.501391	-0.319928	-0.000704525	0.359319	-0.579406	-0.220791	-0.393563	-0.510093
TCGA-HU-8610	TCGA-STAD	0.77	0	TMEcluster-B	-0.761105	-0.381611	-0.439684	-1.15968	-0.054965	-0.635797	-0.498374	-0.756273	-0.118711	-0.0534522	1.32365	-0.462386	-0.829579	2.12823	-1.22606	-0.987219	-0.319928	3.00304	-0.697949	2.69551	-0.0901029	-0.400791	0.144078
TCGA-HU-A4G2	TCGA-STAD	24.63	0	TMEcluster-C	0.85312	-0.381611	0.0757131	1.26587	-0.054965	-0.663798	1.16694	-0.756273	-0.802319	-0.0534522	-0.821426	-0.149664	-0.565042	-0.764823	0.437641	0.858569	1.5165	-0.455277	-0.448747	-0.579406	-0.220791	-0.441367	-0.724258
TCGA-HU-A4G3	TCGA-STAD	5.67	0	TMEcluster-A	-0.440145	-0.381611	-0.442856	-0.833046	-0.054965	0.433342	-0.858063	-0.756273	-0.802319	-0.0534522	-1.42517	3.62778	-0.829579	0.00888605	-1.17134	0.776764	-0.319928	-0.125629	4.79673	-0.579406	-0.220791	0.0434906	-0.421415
TCGA-HU-A4G8	TCGA-STAD	23	0	TMEcluster-C	-0.0105496	1.58995	-0.442856	-0.788797	-0.054965	-0.369056	1.32665	3.24505	-0.802319	-0.0534522	-0.235638	-0.462386	-0.502224	-0.00704801	1.3616	-0.750742	-0.319928	-0.343208	-0.697949	-0.420481	1.40575	-0.441367	-0.846179
TCGA-HU-A4G9	TCGA-STAD	24.53	0	TMEcluster-B	-1.24077	2.02241	-0.442856	-0.860998	-0.054965	1.1209	-0.858063	-0.756273	-0.802319	-0.0534522	-1.42517	1.38494	-0.829579	0.450393	-0.327162	-0.740349	-0.319928	3.38203	-0.258681	-0.579406	-0.220791	1.36714	-2.47164
TCGA-HU-A4GC	TCGA-STAD	3.3	0	TMEcluster-A	-0.109686	-0.381611	0.679389	0.932359	-0.054965	1.26268	0.0750443	-0.756273	0.289069	-0.0534522	0.212165	-0.462386	-0.167784	-1.01463	-0.310486	-0.0886883	0.731259	-0.491763	0.186894	-0.301752	-0.220791	-0.441367	-0.485136
TCGA-HU-A4GD	TCGA-STAD	23.07	0	TMEcluster-B	1.65834	-0.381611	-0.442856	1.12703	-0.054965	-0.25696	0.484896	-0.756273	-0.802319	-0.0534522	-1.42517	-0.462386	-0.409632	0.0614888	-0.914836	-1.68381	-0.319928	-0.188503	-0.697949	3.30673	-0.220791	0.10801	-2.47607
TCGA-HU-A4GF	TCGA-STAD	26.17	0	TMEcluster-B	-0.402453	-0.381611	-0.334687	-1.15968	-0.054965	0.808885	-0.796472	0.240137	-0.418504	-0.0534522	0.0916653	-0.462386	-0.829579	1.1687	0.59128	-0.990953	-0.319928	0.333323	-0.697949	0.2076	-0.220791	2.32186	-1.28275
TCGA-HU-A4GH	TCGA-STAD	11.93	0	TMEcluster-B	0.520492	-0.381611	0.246153	-1.15968	-0.054965	1.41518	-0.672172	-0.756273	0.674416	-0.0534522	-0.219712	0.454375	-0.829579	0.319474	-0.58902	-0.442111	-0.319928	-0.126723	-0.333061	-0.579406	-0.220791	1.0065	-2.3094
TCGA-HU-A4GJ	TCGA-STAD	21.67	0	TMEcluster-A	1.61646	3.61778	-0.0409826	0.579621	-0.054965	-0.335481	-0.400624	1.65266	-0.802319	-0.0534522	-0.921259	-0.462386	-0.60545	-0.681446	-1.03452	-1.25464	-0.319928	0.288687	-0.697949	-0.51526	-0.220791	-0.441367	-0.642686
TCGA-HU-A4GP	TCGA-STAD	9.1	0	TMEcluster-B	-0.285915	0.728595	-0.442856	-0.64563	-0.054965	0.898226	-0.642691	-0.756273	-0.802319	-0.0534522	0.933952	-0.462386	-0.235599	0.127081	-0.677121	0.170227	-0.319928	0.69446	0.0391534	0.156704	-0.220791	-0.441367	-0.758805
TCGA-HU-A4GQ	TCGA-STAD	0.1	1	TMEcluster-C	-1.07286	-0.381611	-0.442856	-0.360233	-0.054965	0.0736735	0.377804	1.30317	-0.802319	-0.0534522	0.367747	-0.344995	-0.147523	-0.991143	2.98004	0.801369	-0.319928	0.641848	1.17124	-0.579406	-0.220791	-0.441367	0.513514
TCGA-HU-A4GT	TCGA-STAD	6.6	0	TMEcluster-C	-0.714192	-0.381611	-0.388251	-0.363553	-0.054965	0.592761	0.276981	-0.279402	1.73189	-0.0534522	-0.488678	-0.462386	-0.829579	0.512291	0.645239	0.522314	-0.319928	-0.726004	-0.697949	-0.579406	-0.220791	0.0287306	-0.832054
TCGA-HU-A4GU	TCGA-STAD	6.67	0	TMEcluster-B	-0.598114	-0.381611	-0.328112	-1.15968	-0.054965	1.28186	0.574746	-0.756273	0.814677	-0.0534522	1.45578	-0.462386	-0.728881	-0.0881059	-1.00342	0.107252	-0.319928	0.297791	-0.697949	1.772	-0.220791	-0.441367	-0.471088
TCGA-HU-A4GX	TCGA-STAD	20.53	0	TMEcluster-C	-1.24077	0.126553	1.51621	2.34039	-0.054965	-1.2346	1.31982	1.97713	1.23052	-0.0534522	-0.59005	-0.462386	-0.365454	-1.01463	2.07953	0.0121055	-0.319928	-0.683513	-0.246395	-0.579406	-0.220791	-0.441367	-1.0106
TCGA-HU-A4GY	TCGA-STAD	0.27	0	TMEcluster-A	1.32389	1.69416	-0.442856	-0.204769	-0.054965	0.2616	-0.272832	-0.756273	-0.802319	-0.0534522	-0.273055	-0.462386	-0.437319	-0.655544	-0.353664	0.508467	-0.319928	-0.288159	-0.622361	-0.579406	-0.220791	-0.441367	0.564536
TCGA-HU-A4H0	TCGA-STAD	2.13	0	TMEcluster-C	-0.160218	-0.381611	0.0246311	0.274681	-0.054965	-0.0246264	0.833137	2.29573	-0.250844	-0.0534522	0.620976	-0.462386	-0.528428	-1.01463	2.71039	-0.363584	0.579383	-0.650558	0.0387521	-0.579406	-0.220791	-0.441367	-1.30628
TCGA-HU-A4H2	TCGA-STAD	13.13	0	TMEcluster-B	-0.557965	0.823739	-0.442856	0.0452446	-0.054965	0.907083	0.0455141	1.33646	-0.752585	-0.0534522	1.24219	-0.462386	1.58387	-0.274266	-0.426237	-1.68381	0.159511	0.727467	-0.697949	1.09323	2.29295	-0.441367	-0.788035
TCGA-HU-A4H3	TCGA-STAD	29.4	0	TMEcluster-C	-0.502227	-0.381611	-0.442856	0.469717	-0.054965	0.314776	2.36169	1.23764	-0.802319	-0.0534522	1.31365	-0.36144	-0.829579	-0.523871	-0.103875	-0.398284	-0.319928	-0.112955	-0.697949	0.623994	-0.220791	0.0778025	-0.297851
TCGA-HU-A4H4	TCGA-STAD	24.17	0	TMEcluster-C	-0.829815	0.465104	-0.442856	-0.631484	-0.054965	-0.0240936	0.736003	0.0657502	-0.683543	-0.0534522	-0.5425	1.67955	-0.0630366	0.513016	1.72805	-1.02968	-0.319928	1.66912	0.272888	-0.579406	-0.220791	-0.441367	-0.567537
TCGA-HU-A4H5	TCGA-STAD	24.13	0	TMEcluster-B	-0.377245	-0.381611	1.51841	-0.873553	-0.054965	-0.706372	-0.364739	-0.60285	0.664962	-0.0534522	0.22039	-0.462386	-0.829579	2.13846	-0.267807	-0.359982	-0.319928	-0.726004	-0.697949	0.137393	-0.220791	0.240278	-1.39042
TCGA-HU-A4H6	TCGA-STAD	21.47	0	TMEcluster-A	1.6412	0.792167	0.791521	-0.371171	-0.054965	-0.366537	-0.668594	0.467981	-0.802319	-0.0534522	-0.703747	-0.462386	-0.829579	-0.630989	0.0885194	-0.589061	-0.319928	0.144205	0.865616	-0.579406	-0.220791	1.7016	-0.41629
TCGA-HU-A4H8	TCGA-STAD	14.27	0	TMEcluster-B	-1.24077	0.941149	-0.171211	0.633871	-0.054965	0.360461	1.51596	-0.756273	-0.730653	-0.0534522	1.24264	-0.462386	2.69474	-0.464285	-1.22606	-0.69334	-0.319928	1.69908	0.246664	-0.579406	3.88127	-0.441367	-1.58548
TCGA-HU-A4HB	TCGA-STAD	15.9	1	TMEcluster-A	2.61186	0.508968	-0.0345296	-0.243521	-0.054965	-0.134625	-0.57222	0.383946	0.336133	-0.0534522	0.174297	-0.462386	-0.829579	-0.133867	-0.0819487	-1.2374	-0.319928	-0.726004	-0.335334	-0.579406	-0.220791	-0.441367	-0.803974
TCGA-HU-A4HD	TCGA-STAD	33.87	0	TMEcluster-B	-0.314506	-0.381611	-0.229968	-0.662566	-0.054965	0.720483	-0.772757	-0.756273	0.734337	-0.0534522	0.11793	-0.462386	-0.54835	0.930002	-0.471134	0.534371	-0.319928	-0.722623	-0.697949	0.417731	-0.220791	-0.441367	-0.120334
TCGA-IN-7806	TCGA-STAD	36.87	0	TMEcluster-A	0.432241	1.78414	-0.442856	-1.15968	-0.054965	-0.175344	-0.858063	-0.756273	-0.169905	-0.0534522	-0.0213261	-0.462386	-0.829579	0.775614	-0.810098	1.25134	-0.319928	-0.726004	-0.697949	-0.579406	-0.220791	-0.441367	-0.813539
TCGA-IN-7808	TCGA-STAD	3.5	1	TMEcluster-A	3.3846	1.03189	1.11042	0.420212	-0.054965	-1.1961	-0.598375	-0.168347	1.32336	-0.0534522	-1.15205	-0.462386	-0.606503	-0.679177	-0.928444	-0.809217	-0.319928	-0.382261	-0.697949	-0.0899886	-0.220791	-0.441367	-1.41097
TCGA-IN-8462	TCGA-STAD	19.07	0	TMEcluster-A	1.25619	-0.381611	1.71097	-0.431388	-0.054965	-0.260389	-0.0869974	-0.438919	0.337284	-0.0534522	-0.918032	-0.462386	-0.17855	-0.98435	0.430393	-0.358086	1.60497	0.0757088	2.43953	-0.579406	-0.220791	-0.441367	0.0826604
TCGA-IN-8663	TCGA-STAD	3.43	1	TMEcluster-A	-1.24077	-0.110698	-0.290143	-0.568017	-0.054965	-0.539019	0.775965	0.400622	-0.802319	-0.0534522	-0.491825	1.45233	0.597313	0.786408	-0.562483	1.22447	-0.319928	-0.516976	1.21886	-0.579406	3.50042	-0.441367	-0.499169
TCGA-IN-A6RI	TCGA-STAD	18.63	0	TMEcluster-B	-0.33415	-0.381611	0.0905351	-1.15968	-0.054965	0.544655	-0.858063	-0.756273	1.27401	-0.0534522	-1.11588	-0.462386	-0.829579	1.46183	-1.20629	0.567827	-0.319928	0.588734	-0.697949	0.316171	-0.220791	0.0163843	-1.8592
TCGA-IN-A6RJ	TCGA-STAD	12.63	0	TMEcluster-A	0.349032	-0.381611	-0.442856	1.53909	-0.054965	0.303019	-0.507896	-0.756273	0.105964	-0.0534522	-1.42517	-0.462386	1.80935	-0.856532	-1.22606	-1.29577	-0.319928	3.3392	3.2768	-0.579406	-0.220791	-0.38685	-1.81479
TCGA-IN-A6RL	TCGA-STAD	13.53	1	TMEcluster-A	-0.0781416	0.0681722	0.210401	-0.873325	-0.054965	0.587674	-0.478256	-0.756273	-0.57622	-0.0534522	-0.601741	-0.462386	-0.468875	-0.829025	0.525566	2.36134	-0.319928	-0.582693	0.421095	-0.579406	-0.220791	-0.0628052	-0.676404
TCGA-IN-A6RN	TCGA-STAD	19.8	0	TMEcluster-A	0.232465	-0.381611	-0.442856	-1.15968	-0.054965	2.44639	-0.858063	-0.756273	-0.802319	-0.0534522	-0.249037	-0.462386	-0.829579	0.16621	-0.440341	0.264436	-0.319928	-0.471092	-0.218271	-0.205381	-0.220791	-0.441367	-0.690145
TCGA-IN-A6RR	TCGA-STAD	6.83	1	TMEcluster-C	0.89247	-0.381611	0.243617	1.30493	-0.054965	0.432261	0.760591	0.111354	-0.802319	-0.0534522	0.732466	-0.462386	0.189028	-1.01463	-0.484178	-0.692683	-0.319928	-0.642982	0.792289	-0.54064	-0.220791	-0.441367	-1.50443
TCGA-IN-A6RS	TCGA-STAD	12.77	0	TMEcluster-B	-0.376995	-0.381611	-0.30886	0.41562	-0.054965	0.00581147	2.21927	-0.407904	-0.699288	-0.0534522	1.73768	-0.462386	-0.415787	0.315848	-0.340647	-0.747904	-0.319928	-0.142194	-0.697949	0.33607	-0.220791	-0.123186	-0.708401
TCGA-IN-A7NR	TCGA-STAD	6.6	0	TMEcluster-A	2.38344	-0.381611	0.0437009	0.214302	-0.054965	0.564022	-0.858063	-0.291677	0.756753	-0.0534522	-0.668947	-0.462386	-0.0508727	-1.01463	-0.619901	-0.236091	-0.319928	0.521385	-0.697949	-0.261189	-0.220791	-0.441367	-0.600524
TCGA-IN-A7NT	TCGA-STAD	10.77	0	TMEcluster-B	-1.05004	-0.381611	-0.337258	-1.03132	-0.054965	-1.25499	-0.850354	-0.686909	-0.802319	-0.0534522	0.400489	-0.462386	-0.829579	1.12374	-0.907515	0.449532	-0.319928	4.89112	-0.697949	3.76041	-0.220791	0.0998416	0.0310499
TCGA-IN-A7NU	TCGA-STAD	11.87	0	TMEcluster-C	-0.427904	-0.381611	-0.442856	0.668646	-0.054965	-0.566008	0.858819	-0.756273	0.438611	-0.0534522	0.535054	-0.462386	0.16236	-0.50604	0.381975	1.2343	-0.319928	0.462078	-0.246466	-0.579406	-0.220791	0.0310506	0.2034
TCGA-IN-AB1V	TCGA-STAD	15.97	0	TMEcluster-A	0.741339	2.2451	-0.442856	0.895843	-0.054965	0.409644	-0.858063	0.162125	-0.802319	-0.0534522	-1.42517	1.3349	1.33939	-0.877261	-1.22606	-1.03996	-0.319928	0.886436	0.882952	-0.579406	-0.220791	-0.441367	-1.54619
TCGA-IN-AB1X	TCGA-STAD	13.7	0	TMEcluster-B	-0.543923	-0.381611	0.665044	1.17099	-0.054965	0.994849	-0.0221403	0.41447	-0.401386	-0.0534522	1.45279	-0.462386	0.0864973	-0.739401	-0.693493	-0.946236	-0.319928	1.60857	-0.697949	0.34722	-0.220791	-0.153728	-0.975343
TCGA-IP-7968	TCGA-STAD	2.57	0	TMEcluster-A	-0.999294	-0.381611	-0.426993	-0.457599	-0.054965	0.774669	-0.20637	3.55205	-0.714161	-0.0534522	0.822667	-0.0454645	1.85882	-0.183691	0.104963	-1.25501	-0.319928	0.105325	2.55228	-0.579406	3.87641	-0.441367	0.462016
TCGA-KB-A6F7	TCGA-STAD	64.5	0	TMEcluster-C	-0.276464	-0.381611	-0.210862	1.88023	-0.054965	-0.604792	0.661156	1.0941	0.483349	-0.0534522	-0.322838	-0.184899	0.160164	-0.394506	-0.45953	0.641218	-0.319928	-0.405032	-0.697949	-0.0506738	-0.220791	-0.441367	-2.02652
TCGA-KB-A93G	TCGA-STAD	20.43	0	TMEcluster-B	-0.804948	-0.381611	-0.417476	-1.15968	-0.054965	-1.02321	-0.858063	-0.756273	-0.802319	-0.0534522	0.276245	-0.462386	-0.697503	2.25445	-1.22606	-0.41661	-0.319928	0.17385	-0.697949	4.22809	-0.220791	2.21964	2.3208
TCGA-KB-A93H	TCGA-STAD	38.17	0	TMEcluster-B	-0.909181	-0.381611	-0.442856	-0.836854	-0.054965	0.621601	-0.858063	1.61708	-0.732137	-0.0534522	0.741148	-0.462386	0.651887	1.18115	1.29156	-1.68381	-0.319928	-0.726004	-0.697949	1.992	5.954	-0.441367	-2.09121
TCGA-KB-A93J	TCGA-STAD	37.47	0	TMEcluster-C	-0.601133	-0.381611	-0.420648	-1.07503	-0.054965	0.480724	-0.51011	-0.386646	1.5876	-0.0534522	-0.641285	0.0955336	-0.415132	0.0314009	2.06164	1.16531	-0.170689	-0.726004	-0.22607	-0.579406	-0.220791	-0.441367	-1.05783
TCGA-MX-A5UG	TCGA-STAD	3.77	1	TMEcluster-A	0.333294	3.43732	-0.442856	-0.571672	-0.054965	1.2089	-0.302482	-0.756273	-0.802319	-0.0534522	0.307134	-0.462386	0.112293	-0.481437	-0.662386	-1.12339	-0.319928	0.236811	-0.514858	-0.421583	-0.220791	-0.441367	1.70501
TCGA-MX-A5UJ	TCGA-STAD	20	0	TMEcluster-A	0.714503	-0.381611	-0.442856	-0.486091	-0.054965	0.382361	-0.452161	3.09377	-0.802319	-0.0534522	0.192433	-0.462386	0.145367	-0.853597	0.313415	-0.130353	-0.319928	1.51431	0.589196	-0.579406	-0.220791	-0.398362	0.840452
TCGA-MX-A663	TCGA-STAD	10	1	TMEcluster-B	0.0960364	-0.381611	-0.442856	-0.344692	-0.054965	0.112567	-0.858063	0.0426047	0.110161	-0.0534522	-0.904014	0.276369	0.604137	0.345724	-0.360471	-0.0476546	-0.319928	-0.726004	-0.697949	3.17895	-0.220791	-0.441367	1.28601
TCGA-MX-A666	TCGA-STAD	14.23	0	TMEcluster-A	4.41052	1.14664	-0.442856	-1.0307	-0.054965	-0.717074	0.230266	1.07381	-0.802319	-0.0534522	-0.466097	-0.462386	-0.160452	-0.396049	-1.22606	-1.49512	-0.319928	-0.157242	-0.133165	-0.579406	-0.220791	-0.441367	-0.993506
TCGA-R5-A7O7	TCGA-STAD	46.3	0	TMEcluster-B	0.31806	-0.381611	-0.100846	-0.491532	-0.054965	2.16297	0.0505029	-0.756273	-0.802319	-0.0534522	1.40036	-0.462386	-0.117799	-0.739787	-0.117148	-1.13849	-0.319928	-0.139555	-0.697949	1.15295	-0.220791	-0.0539919	-0.73575
TCGA-R5-A7ZE	TCGA-STAD	18.47	1	TMEcluster-B	-1.23834	-0.0826763	-0.442856	-0.456497	-0.054965	0.94955	-0.858063	-0.287329	-0.802319	-0.0534522	-1.42517	1.52722	2.98383	2.31315	-1.22606	-1.68381	0.462994	-0.0359016	-0.21509	-0.579406	-0.220791	1.55659	-1.35858
TCGA-R5-A7ZF	TCGA-STAD	8.63	1	TMEcluster-B	-1.20855	0.00520437	-0.146678	-0.527597	-0.054965	-0.326338	3.1785	0.895859	-0.802319	-0.0534522	0.406902	0.716072	-0.829579	0.359391	-0.81779	-1.44922	-0.319928	1.54645	-0.697949	3.2938	0.690452	-0.0173493	-1.43397
TCGA-R5-A7ZI	TCGA-STAD	75.57	0	TMEcluster-C	-0.688153	-0.381611	0.801737	1.83564	-0.054965	-1.56877	0.28296	2.4247	2.16269	-0.0534522	1.15465	-0.462386	-0.573316	-0.973224	-0.122616	0.516606	-0.319928	1.21013	-0.697949	0.395326	-0.220791	-0.441367	-1.59732
TCGA-R5-A7ZR	TCGA-STAD	6.17	1	TMEcluster-A	-1.24077	1.61403	2.15046	-1.10885	-0.054965	1.14171	-0.858063	0.602756	1.53332	-0.0534522	-0.954614	-0.168903	-0.702524	-0.0460821	0.408696	0.0221735	-0.319928	-0.333728	-0.489267	-0.579406	-0.220791	-0.441367	-1.94322
TCGA-R5-A805	TCGA-STAD	9.37	1	TMEcluster-B	-0.775961	-0.381611	-0.235113	-0.705762	-0.054965	-0.847876	-0.858063	-0.756273	-0.802319	-0.0534522	-0.269361	-0.462386	2.69656	0.463647	-1.22606	-0.68732	-0.319928	3.39954	-0.274059	0.567966	-0.220791	7.57525	0.485405
TCGA-RD-A7BS	TCGA-STAD	11.2	1	TMEcluster-A	0.779673	1.59395	-0.442856	-0.825293	-0.054965	0.224249	-0.858063	0.325525	-0.802319	-0.0534522	-0.623853	-0.160304	0.216055	0.00683218	0.772826	-1.54374	-0.319928	2.40688	0.495129	-0.574186	-0.220791	-0.441367	-0.481593
TCGA-RD-A7BT	TCGA-STAD	8.73	1	TMEcluster-A	-0.643982	-0.381611	-0.24908	0.158429	-0.054965	2.00827	-0.0463162	-0.557056	0.762962	-0.0534522	0.14202	-0.462386	-0.203924	-0.634392	0.18988	-0.0739787	1.29588	-0.726004	-0.692265	-0.52746	-0.220791	0.397751	-1.57793
TCGA-RD-A7BW	TCGA-STAD	5.2	1	TMEcluster-C	-0.572456	-0.381611	-0.442856	3.02509	-0.054965	-0.402084	-0.858063	-0.305155	0.507936	-0.0534522	-1.42517	0.871816	-0.120691	-1.01463	1.51292	1.18535	-0.319928	-0.726004	-0.262134	-0.579406	-0.220791	-0.441367	1.04215
TCGA-RD-A7C1	TCGA-STAD	16.9	1	TMEcluster-C	-0.39664	-0.381611	-0.326518	1.28542	-0.054965	-1.10186	0.00701933	0.852589	0.81978	-0.0534522	-0.68578	0.158322	-0.829579	-0.594548	0.716774	0.568302	-0.319928	-0.726004	-0.697949	1.77818	-0.220791	1.79192	-1.23784
TCGA-RD-A8MV	TCGA-STAD	124	0	TMEcluster-B	0.590713	-0.381611	-0.337838	0.797031	-0.054965	0.121139	-0.170144	-0.19522	-0.802319	-0.0534522	1.19389	-0.462386	0.273429	-0.205152	0.123453	-0.729858	-0.319928	-9.84192e-05	-0.45711	-0.407479	-0.220791	1.0397	-0.800333
TCGA-RD-A8MW	TCGA-STAD	38.43	1	TMEcluster-B	-1.15499	-0.235142	1.41979	-0.818086	-0.054965	-0.14762	0.656649	-0.756273	-0.802319	-0.0534522	0.760523	-0.462386	-0.326045	1.43148	1.23041	-0.0184591	-0.319928	-0.726004	-0.697949	-0.509594	-0.220791	-0.309193	0.903295
TCGA-RD-A8N0	TCGA-STAD	41.2	0	TMEcluster-A	-0.750902	5.2562	0.355037	0.830159	-0.054965	0.633835	-0.850354	0.110615	-0.606449	-0.0534522	-0.302811	-0.462386	0.28046	-1.01463	-0.793307	-0.910544	-0.319928	-0.512017	0.151201	-0.579406	-0.220791	-0.441367	0.0884104
TCGA-RD-A8N1	TCGA-STAD	117.3	0	TMEcluster-A	0.257594	0.998636	-0.442856	0.330734	-0.054965	1.24465	-0.00575666	-0.756273	-0.802319	-0.0534522	0.0609617	-0.462386	-0.150104	-0.416056	-5.50326e-05	-0.444541	-0.319928	-0.255341	-0.697949	-0.390128	-0.220791	-0.441367	-0.0553171
TCGA-RD-A8N2	TCGA-STAD	118	0	TMEcluster-A	0.126618	-0.381611	-0.442856	0.262741	-0.054965	1.01662	-0.719203	-0.756273	-0.802319	-0.0534522	-0.819439	-0.0199767	0.749677	-1.01463	-0.576217	0.953534	3.14724	0.193788	1.22846	-0.579406	-0.220791	-0.441367	1.47395
TCGA-RD-A8N4	TCGA-STAD	72.37	0	TMEcluster-A	0.482728	-0.381611	-0.442856	-0.0368979	-0.054965	2.00548	-0.629385	-0.756273	-0.802319	-0.0534522	-0.51708	-0.462386	0.379472	-1.01463	0.855897	0.199656	-0.319928	-0.418328	0.00335777	-0.579406	-0.220791	-0.441367	1.10565
TCGA-RD-A8N5	TCGA-STAD	58.23	1	TMEcluster-B	-0.951859	-0.381611	-0.442856	-1.15968	-0.054965	-0.824165	-0.858063	-0.756273	-0.802319	-0.0534522	0.996345	-0.462386	-0.829579	0.557101	-1.22606	1.63722	-0.319928	0.561387	-0.697949	2.08973	-0.220791	4.945	1.34082
TCGA-RD-A8N6	TCGA-STAD	9.07	1	TMEcluster-A	0.135278	-0.381611	-0.442856	-1.11181	-0.054965	0.345452	-0.858063	-0.756273	-0.733741	-0.0534522	-1.42517	2.09472	-0.14171	-0.36346	0.734778	2.25042	-0.319928	-0.692124	0.797415	-0.579406	-0.220791	-0.441367	0.0834012
TCGA-RD-A8N9	TCGA-STAD	36.1	0	TMEcluster-A	0.140227	-0.381611	0.643284	0.377902	-0.054965	0.187302	0.791755	1.10254	0.56212	-0.0534522	-1.11831	0.253153	0.843821	-0.443281	-0.275764	-1.24809	0.100347	-0.726004	2.88009	-0.579406	-0.220791	-0.441367	1.4161
TCGA-RD-A8NB	TCGA-STAD	17.1	1	TMEcluster-C	0.328208	-0.381611	-0.442856	0.185806	-0.054965	-0.109134	0.190829	0.849879	-0.157276	-0.0534522	-0.79548	0.996071	-0.0608457	-0.981254	1.4906	-0.0127371	-0.319928	0.759842	1.08796	-0.579406	-0.220791	-0.216406	0.487751
TCGA-SW-A7EA	TCGA-STAD	19.3	0	TMEcluster-C	-0.706952	-0.381611	-0.327537	2.4319	-0.054965	-1.80984	2.30278	2.84104	-0.128613	-0.0534522	-0.966178	2.9255	0.0330176	-0.821786	0.48322	-0.488239	0.822918	1.35541	0.0482896	-0.579406	-0.220791	-0.116828	0.338478
TCGA-SW-A7EB	TCGA-STAD	5.87	0	TMEcluster-A	2.3303	-0.381611	-0.442856	0.309983	-0.054965	0.753475	-0.858063	0.494611	1.18918	-0.0534522	-0.56005	-0.462386	0.518016	-0.685122	-0.635084	-1.19279	-0.319928	-0.143734	-0.697949	0.0469251	-0.220791	-0.441367	-1.00899
TCGA-VQ-A8DT	TCGA-STAD	49.47	0	TMEcluster-B	-1.24077	0.558615	0.104217	0.527104	-0.054965	1.73389	0.151453	-0.756273	-0.802319	-0.0534522	0.0545291	-0.462386	-0.829579	-0.400836	-0.945409	-0.42806	-0.319928	0.728477	0.00888596	0.688895	-0.220791	0.542294	-1.49226
TCGA-VQ-A8DU	TCGA-STAD	5.53	1	TMEcluster-A	0.326964	-0.381611	-0.442856	0.428229	-0.054965	1.34674	0.228307	-0.756273	-0.802319	-0.0534522	-0.530149	0.0971112	0.179948	-0.321843	0.225891	-0.629476	-0.319928	-0.288089	0.458042	-0.579406	-0.220791	-0.383144	-0.127848
TCGA-VQ-A8DV	TCGA-STAD	13.43	1	TMEcluster-B	-1.10528	0.419824	-0.442856	1.68972	-0.054965	-0.030238	-0.858063	-0.583823	-0.802319	-0.0534522	-0.841685	-0.462386	2.64326	0.405736	-0.81359	-1.02601	-0.319928	0.696835	-0.697949	2.28556	-0.220791	0.763006	-1.71186
TCGA-VQ-A8DZ	TCGA-STAD	13.2	1	TMEcluster-B	-0.30879	-0.381611	-0.299222	0.293697	-0.054965	-0.0389727	-0.128302	-0.756273	-0.67034	-0.0534522	0.6996	-0.462386	-0.829579	0.256848	0.150413	0.377628	-0.319928	-0.613033	0.266656	-0.328066	-0.220791	1.74512	-0.459051
TCGA-VQ-A8E0	TCGA-STAD	18.73	1	TMEcluster-B	-0.158311	-0.381611	-0.420648	-0.815023	-0.054965	-0.304608	-0.219285	1.65098	-0.767163	-0.0534522	1.27542	-0.462386	-0.289597	1.33413	-1.22606	-0.622621	-0.319928	-0.0324587	-0.697949	2.19226	-0.220791	-0.0911257	-1.14401
TCGA-VQ-A8E2	TCGA-STAD	43.97	0	TMEcluster-B	0.174002	-0.381611	0.113029	0.0481881	-0.054965	-0.238186	0.372843	-0.264211	-0.802319	-0.0534522	0.647907	-0.462386	-0.829579	1.81339	0.258515	-1.10166	-0.319928	-0.726004	-0.697949	-0.579406	-0.220791	-0.441367	0.46925
TCGA-VQ-A8E3	TCGA-STAD	22.03	1	TMEcluster-C	-0.219754	-0.381611	-0.0350518	1.54776	-0.054965	-2.0984	0.472008	2.81396	0.667863	-0.0534522	2.11989	0.747147	-0.286404	-1.01463	-1.17553	-0.216889	-0.319928	5.4263	0.34201	-0.579406	-0.220791	-0.369403	-1.1157
TCGA-VQ-A8E7	TCGA-STAD	37.93	0	TMEcluster-A	-0.681846	-0.381611	0.126829	0.504177	-0.054965	0.513695	-0.858063	1.0119	-0.802319	-0.0534522	-0.490139	-0.462386	0.403498	0.323356	0.0801892	-0.315472	-0.319928	-0.239977	0.158865	0.682198	-0.220791	0.260089	0.129573
TCGA-VQ-A8P2	TCGA-STAD	38.67	0	TMEcluster-B	0.112228	-0.381611	-0.00781473	-0.475436	-0.054965	1.42137	1.41551	-0.756273	-0.802319	-0.0534522	0.493714	-0.462386	-0.829579	-0.257354	-1.01614	-0.274097	-0.319928	-0.585437	-0.697949	1.54062	-0.220791	-0.441367	-1.20515
TCGA-VQ-A8P3	TCGA-STAD	37.73	0	TMEcluster-C	0.291963	-0.381611	-0.186129	1.7912	-0.054965	-0.586906	0.651684	0.811459	2.379	-0.0534522	0.471767	1.14133	0.153507	-0.778182	-0.614025	-1.05979	1.15276	-0.726004	0.924505	-0.579406	-0.220791	-0.441367	0.579068
TCGA-VQ-A8P5	TCGA-STAD	7.83	1	TMEcluster-C	0.106844	-0.381611	0.507771	-0.0866775	-0.054965	-0.285442	1.16814	-0.434315	-0.802319	-0.0534522	0.998591	-0.462386	-0.829579	0.044287	0.892545	0.0798617	-0.319928	-0.726004	-0.243032	-0.579406	-0.220791	0.417684	0.080429
TCGA-VQ-A8P8	TCGA-STAD	31.4	0	TMEcluster-A	1.27142	3.75232	-0.442856	-0.826236	-0.054965	0.930441	-0.858063	0.0693754	-0.802319	-0.0534522	-0.387014	-0.462386	-0.597544	-0.722564	-1.22606	-1.31207	-0.319928	1.67028	-0.157536	-0.429665	-0.220791	-0.441367	0.324354
TCGA-VQ-A8PB	TCGA-STAD	34.77	1	TMEcluster-B	-0.742368	-0.381611	-0.358884	0.644449	-0.054965	0.317982	-0.858063	1.47959	-0.802319	-0.0534522	1.29838	-0.462386	-0.829579	0.929704	-0.270012	-0.888168	-0.319928	-0.339323	-0.697949	0.979471	-0.220791	0.471693	0.125587
TCGA-VQ-A8PC	TCGA-STAD	46.9	1	TMEcluster-A	-0.375849	2.27835	-0.156469	-0.846736	-0.054965	0.74515	-0.858063	-0.756273	-0.802319	-0.0534522	-1.13319	0.143942	-0.120455	-0.868705	-0.73276	1.35521	0.164264	0.293162	1.37328	-0.579406	-0.220791	0.0148801	-0.235713
TCGA-VQ-A8PD	TCGA-STAD	16.53	1	TMEcluster-A	0.100799	3.2078	-0.442856	-0.208431	-0.054965	1.08508	-0.211358	-0.756273	-0.802319	-0.0534522	0.786971	-0.462386	-0.379389	-0.71086	-0.372169	-0.963584	-0.319928	0.676641	-0.587505	-0.579406	-0.220791	-0.233259	0.565673
TCGA-VQ-A8PE	TCGA-STAD	22.5	1	TMEcluster-B	-0.0701953	0.999081	-0.442856	-0.209002	-0.054965	0.0409562	1.14913	0.28267	-0.802319	-0.0534522	0.786781	-0.462386	0.121247	0.416188	-0.752452	-1.2536	-0.319928	0.727132	-0.697949	0.939374	-0.220791	-0.441367	-0.672918
TCGA-VQ-A8PF	TCGA-STAD	2.53	1	TMEcluster-A	1.36308	-0.381611	0.845224	0.0228281	-0.054965	0.246011	0.16599	-0.179119	-0.147662	-0.0534522	-0.672449	0.285444	0.0157937	-0.937341	0.735203	-0.182297	-0.0942241	-0.293068	-0.0153634	-0.579406	-0.220791	-0.441367	-0.12992
TCGA-VQ-A8PH	TCGA-STAD	12.97	1	TMEcluster-A	-0.635048	1.04848	-0.442856	1.64026	-0.054965	1.91176	-0.374594	1.37758	-0.7906	-0.0534522	-1.42517	-0.462386	1.43354	-0.505051	-0.938039	-1.68381	-0.319928	-0.501397	-0.697949	0.888468	3.65852	-0.441367	-1.24738
TCGA-VQ-A8PJ	TCGA-STAD	2.73	1	TMEcluster-B	-0.158792	-0.381611	0.736934	-1.15968	-0.054965	1.66862	-0.858063	-0.756273	-0.343726	-0.0534522	0.137873	-0.462386	-0.829579	0.725559	-0.484204	-0.49329	-0.319928	0.60121	-0.697949	0.442338	-0.220791	-0.375222	-0.969949
TCGA-VQ-A8PK	TCGA-STAD	18.1	1	TMEcluster-C	-0.380624	-0.381611	0.838158	-1.15968	-0.054965	-0.0625843	2.26749	-0.756273	-0.802319	-0.0534522	1.85785	-0.140803	-0.829579	-0.347649	1.22371	0.39653	-0.319928	-0.44149	0.466291	-0.579406	-0.220791	-0.441367	0.468046
TCGA-VQ-A8PM	TCGA-STAD	1.9	1	TMEcluster-A	-0.193235	0.518854	4.12962	-0.451134	-0.054965	1.47024	-0.657546	-0.756273	-0.802319	-0.0534522	0.675495	-0.462386	-0.179486	-0.716216	-1.05937	-0.68396	-0.319928	0.756892	-0.697949	0.190681	-0.220791	-0.441367	0.141992
TCGA-VQ-A8PO	TCGA-STAD	9.4	1	TMEcluster-C	-0.225451	0.108727	-0.442856	0.672802	-0.054965	0.297441	0.38519	3.10873	-0.163318	-0.0534522	1.04103	-0.462386	-0.762102	-0.139834	-0.106804	-0.758015	-0.319928	-0.00087964	-0.697949	-0.257651	-0.220791	-0.441367	0.154143
TCGA-VQ-A8PP	TCGA-STAD	23.73	1	TMEcluster-C	1.01687	-0.381611	-0.442856	-0.652345	-0.054965	0.216598	2.52288	0.351123	-0.778881	-0.0534522	1.18582	-0.462386	0.725349	-0.194447	-0.0356283	-0.977688	-0.319928	0.0672663	-0.697949	-0.579406	-0.0116898	-0.441367	0.642466
TCGA-VQ-A8PQ	TCGA-STAD	15.87	1	TMEcluster-A	1.98357	2.41725	-0.3081	-0.0346623	18.6472	-0.101566	-0.294083	-0.756273	-0.802319	-0.0534522	0.370968	-0.462386	-0.317955	-0.599488	-0.797329	-1.13927	-0.319928	-0.343054	-0.697949	-0.472631	-0.220791	-0.441367	-0.215437
TCGA-VQ-A8PU	TCGA-STAD	27.73	1	TMEcluster-B	-0.194891	-0.381611	-0.0241169	-1.15968	-0.054965	2.72507	-0.858063	-0.756273	-0.802319	-0.0534522	0.14527	-0.462386	-0.698127	-0.463634	-0.996137	0.626776	-0.319928	0.154563	-0.697949	0.198758	-0.220791	0.727452	-1.11087
TCGA-VQ-A8PX	TCGA-STAD	65.47	0	TMEcluster-A	0.356281	-0.381611	2.66525	1.02137	-0.054965	0.778454	-0.241936	-0.756273	0.414462	-0.0534522	0.105309	-0.462386	-0.0833052	-0.943119	-0.142743	-0.977437	-0.319928	0.284403	-0.697949	-0.177333	-0.220791	0.227479	-2.5743
TCGA-VQ-A91A	TCGA-STAD	40	0	TMEcluster-B	-0.544562	-0.381611	0.210185	-1.15968	-0.054965	-0.584861	-0.858063	-0.756273	-0.802319	-0.0534522	0.181276	-0.462386	0.238004	1.32584	-1.22606	0.604536	-0.319928	2.40604	-0.697949	1.77753	-0.220791	0.313765	1.38245
TCGA-VQ-A91D	TCGA-STAD	11.87	1	TMEcluster-C	-0.824676	-0.381611	-0.367776	-0.816359	-0.054965	-1.02375	-0.171874	2.4307	-0.802319	-0.0534522	2.00515	-0.462386	-0.829579	0.442778	2.49594	0.171781	-0.319928	-0.726004	-0.697949	1.49483	-0.220791	-0.0698607	0.316266
TCGA-VQ-A91E	TCGA-STAD	22.13	0	TMEcluster-A	0.136285	-0.194835	3.17399	0.600719	-0.054965	0.845035	-0.048201	0.490526	-0.802319	-0.0534522	0.942652	-0.462386	0.195277	-0.843045	-0.5005	-0.960293	-0.319928	-0.203781	-0.697949	0.0213533	-0.220791	-0.231338	-1.41095
TCGA-VQ-A91K	TCGA-STAD	62.07	0	TMEcluster-A	-1.00441	-0.159673	-0.442856	0.0631091	-0.054965	-0.179074	-0.660301	1.3971	1.45919	-0.0534522	-0.823424	0.357446	-0.406864	0.100312	-0.0566512	1.70171	-0.319928	-0.253238	0.100039	-0.579406	-0.220791	-0.288241	0.282059
TCGA-VQ-A91N	TCGA-STAD	19	1	TMEcluster-B	2.11907	-0.381611	2.61977	-1.02412	-0.054965	0.785897	0.271813	-0.194071	-0.802319	-0.0534522	0.836411	-0.462386	-0.109986	-0.568342	-1.02029	-1.68123	0.955642	0.328357	-0.697949	0.250576	-0.220791	-0.441367	-1.062
TCGA-VQ-A91Q	TCGA-STAD	21.1	1	TMEcluster-B	0.189679	-0.381611	-0.332184	-1.15968	-0.054965	1.52116	-0.69594	-0.756273	-0.7906	-0.0534522	1.41652	-0.462386	-0.482583	-0.247194	-0.641267	-0.230563	-0.319928	2.31407	-0.697949	0.926306	-0.220791	-0.441367	0.576126
TCGA-VQ-A91S	TCGA-STAD	33.33	0	TMEcluster-C	-1.22055	-0.255454	-0.442856	0.541856	-0.054965	0.934457	-0.858063	2.82325	-0.802319	-0.0534522	-1.42517	2.25787	1.4187	0.186519	2.23368	-1.65908	-0.319928	-0.726004	0.544088	-0.579406	4.97263	-0.441367	-0.869965
TCGA-VQ-A91U	TCGA-STAD	1.73	1	TMEcluster-C	0.0924195	-0.381611	-0.347759	-0.359686	-0.054965	-0.174786	0.540568	4.27868	0.442138	-0.0534522	-0.175909	-0.462386	1.10183	0.111137	1.35517	-1.68381	1.4132	-0.458307	-0.697949	-0.392506	7.83904	-0.441367	-0.781222
TCGA-VQ-A91V	TCGA-STAD	43.23	0	TMEcluster-B	1.51725	-0.381611	-0.31267	0.12962	-0.054965	1.0585	-0.401694	-0.756273	-0.802319	-0.0534522	0.0149099	-0.462386	2.04307	-0.93452	-1.22606	-1.53385	-0.319928	0.448333	-0.697949	2.73708	-0.220791	0.219771	-1.59029
TCGA-VQ-A91X	TCGA-STAD	9.63	1	TMEcluster-B	0.692589	-0.381611	0.963151	-0.363027	-0.054965	1.10592	-0.229211	0.586177	0.140637	-0.0534522	0.605763	-0.462386	-0.103295	-0.279191	-0.934885	-0.507708	-0.319928	-0.204967	-0.697949	-0.0328917	-0.220791	-0.441367	-2.39959
TCGA-VQ-A91Y	TCGA-STAD	9.87	1	TMEcluster-A	-0.854653	0.328895	-0.309143	0.148747	-0.054965	1.92754	-0.701148	-0.756273	-0.802319	-0.0534522	-0.631362	-0.163944	0.101309	-0.741679	0.868481	0.565919	-0.00605988	-0.206145	0.103916	-0.579406	-0.220791	-0.441367	1.16452
TCGA-VQ-A91Z	TCGA-STAD	56.33	0	TMEcluster-B	-0.383068	-0.381611	-0.291239	-0.656699	-0.054965	-0.927067	-0.858063	1.99916	-0.802319	-0.0534522	1.59387	-0.462386	-0.829579	2.78356	-1.1687	-1.0111	-0.319928	0.129476	-0.697949	1.02304	-0.220791	-0.441367	-1.73855
TCGA-VQ-A922	TCGA-STAD	9.17	1	TMEcluster-B	0.690109	-0.381611	-0.350233	-1.15968	-0.054965	0.174176	-0.858063	0.689717	-0.487486	-0.0534522	1.29106	-0.462386	-0.829579	0.661356	2.08936	-0.587319	-0.319928	-0.726004	-0.697949	-0.284414	-0.220791	-0.441367	0.752666
TCGA-VQ-A923	TCGA-STAD	2.03	1	TMEcluster-C	0.612283	-0.381611	-0.442856	0.75886	-0.054965	0.650493	-0.0845554	2.11716	-0.142974	-0.0534522	1.29445	-0.462386	-0.264967	-0.689747	0.564861	-1.06399	-0.319928	-0.383269	-0.697949	-0.167386	-0.220791	-0.441367	-0.696221
TCGA-VQ-A924	TCGA-STAD	56.2	1	TMEcluster-C	-1.11328	-0.1653	-0.442856	1.16199	-0.054965	-0.693513	1.52595	1.97806	-0.359726	-0.0534522	0.350983	-0.462386	-0.76942	0.0105199	0.611128	0.375348	-0.319928	0.514959	-0.38235	-0.579406	-0.220791	-0.39345	0.135795
TCGA-VQ-A925	TCGA-STAD	4.6	1	TMEcluster-B	0.322349	-0.381611	-0.197079	-0.513523	-0.054965	3.20102	-0.57355	-0.756273	-0.802319	-0.0534522	0.73455	-0.462386	0.782939	-0.765037	-0.919289	-1.06802	-0.319928	0.0683286	-0.697949	0.487713	-0.220791	-0.441367	-0.533246
TCGA-VQ-A927	TCGA-STAD	6.67	1	TMEcluster-B	-0.451606	-0.381611	3.34935	-0.858153	-0.054965	1.44693	-0.354106	-0.756273	-0.489507	-0.0534522	1.38255	-0.462386	0.657021	-1.01463	-1.22606	0.280848	-0.319928	0.676405	-0.697949	0.882387	-0.220791	-0.441367	0.101715
TCGA-VQ-A928	TCGA-STAD	5.8	1	TMEcluster-B	-0.687319	-0.381611	-0.314515	-1.13949	-0.054965	0.622211	-0.830217	-0.756273	-0.802319	-0.0534522	1.75403	-0.462386	-0.829579	2.42109	-1.22606	-1.26136	-0.319928	0.728356	-0.697949	1.31057	-0.220791	-0.270704	0.638512
TCGA-VQ-A92D	TCGA-STAD	67.73	0	TMEcluster-C	-0.807109	0.404959	-0.442856	-0.70747	-0.054965	-0.483146	-0.794554	0.117902	2.05259	-0.0534522	-0.64894	1.82972	-0.829579	0.374859	3.18446	-0.13884	-0.319928	-0.212288	-0.697949	-0.0158449	-0.220791	-0.441367	-0.0221852
TCGA-VQ-A94O	TCGA-STAD	21.33	1	TMEcluster-B	-0.0626321	-0.381611	-0.0636353	-0.797512	-0.054965	-0.234726	2.594	-0.756273	1.66075	-0.0534522	2.07673	-0.462386	-0.829579	0.100087	-1.16099	-1.39065	-0.319928	0.518141	-0.697949	2.8071	-0.220791	-0.441367	-0.84564
TCGA-VQ-A94P	TCGA-STAD	2.7	1	TMEcluster-A	0.6008	-0.381611	-0.442856	0.465406	-0.054965	0.957334	-0.702052	-0.756273	-0.654374	-0.0534522	-0.772283	-0.212042	3.24563	-1.01463	-0.0153973	0.872403	-0.319928	-0.726004	-0.265565	-0.579406	-0.220791	-0.441367	1.98296
TCGA-VQ-A94R	TCGA-STAD	43.13	1	TMEcluster-A	0.000560642	-0.381611	-0.387369	0.427253	-0.054965	0.95655	-0.488203	0.636902	-0.498919	-0.0534522	-0.447332	-0.462386	0.404429	-0.857232	0.713684	0.63026	-0.319928	-0.173643	0.139536	-0.579406	-0.220791	-0.441367	0.301648
TCGA-VQ-A94T	TCGA-STAD	11.4	1	TMEcluster-B	-0.112121	-0.381611	-0.186896	-1.15968	-0.054965	0.725626	-0.858063	-0.756273	1.43202	-0.0534522	4.76198	-0.462386	-0.829579	0.266971	-1.22606	0.147732	-0.319928	-0.359969	-0.697949	-0.396587	-0.220791	0.151196	-0.309477
TCGA-VQ-A94U	TCGA-STAD	27.3	0	TMEcluster-A	0.0629489	-0.381611	-0.420648	-0.796769	-0.054965	0.589828	-0.858063	-0.756273	0.806167	-0.0534522	-1.42517	0.854132	0.34367	-1.01463	-0.680898	2.82449	0.653193	-0.726004	1.2746	-0.579406	-0.220791	-0.441367	0.376769
TCGA-VQ-AA64	TCGA-STAD	18.67	1	TMEcluster-A	0.675883	-0.381611	-0.442856	-0.154346	-0.054965	1.25834	-0.858063	-0.756273	-0.802319	-0.0534522	-1.42517	2.29135	0.0774917	-0.371755	0.583719	-0.439028	-0.319928	0.605302	0.35195	-0.579406	-0.220791	-0.441367	1.27914
TCGA-VQ-AA68	TCGA-STAD	44.27	0	TMEcluster-A	1.13096	-0.381611	-0.442856	-0.22806	-0.054965	0.50747	0.00349691	-0.179702	0.838174	-0.0534522	-0.320127	-0.462386	-0.829579	-0.486765	-0.0838853	-0.480423	-0.319928	0.384555	1.37186	-0.579406	-0.220791	-0.441367	-0.769061
TCGA-VQ-AA69	TCGA-STAD	28.8	0	TMEcluster-C	-0.834214	-0.381611	-0.373988	1.5342	-0.054965	-0.823586	1.46678	0.341957	-0.802319	-0.0534522	2.50511	-0.462386	0.30412	-0.632044	0.928044	0.607516	-0.319928	-0.726004	-0.697949	-0.428041	3.23919	-0.441367	-1.91385
TCGA-VQ-AA6A	TCGA-STAD	39.47	0	TMEcluster-B	-1.07619	-0.381611	-0.442856	-0.818365	-0.054965	3.26098	-0.858063	-0.405936	-0.802319	-0.0534522	-0.855589	-0.462386	-0.829579	0.442614	-0.225499	-0.946271	-0.319928	0.259131	-0.697949	1.72239	-0.220791	-0.441367	-0.997191
TCGA-VQ-AA6D	TCGA-STAD	17.37	0	TMEcluster-B	-0.571023	-0.381611	-0.442856	-0.265214	-0.054965	0.452537	-0.858063	3.00391	-0.802319	-0.0534522	-0.240247	-0.462386	-0.829579	1.30682	-0.385917	-1.66688	-0.319928	1.65598	-0.697949	1.97234	-0.220791	-0.441367	-1.38236
TCGA-VQ-AA6F	TCGA-STAD	54.87	0	TMEcluster-A	1.08238	2.79992	-0.324379	0.132679	-0.054965	-0.805231	-0.858063	0.905345	1.50883	-0.0534522	-1.42517	1.33651	-0.630073	-0.592248	-0.240892	-1.12814	-0.319928	0.333734	1.20992	-0.579406	-0.220791	-0.441367	-0.787679
TCGA-VQ-AA6G	TCGA-STAD	26.4	1	TMEcluster-B	-0.464688	-0.381611	-0.124363	-1.03607	-0.054965	1.35775	-0.640161	0.0189253	-0.802319	-0.0534522	-0.152979	-0.462386	0.704581	0.243974	-1.22606	-1.35199	-0.319928	2.49669	-0.697949	3.43079	-0.220791	0.284945	-0.831921
TCGA-VQ-AA6J	TCGA-STAD	27.93	0	TMEcluster-B	0.866248	-0.381611	-0.442856	-1.11529	-0.054965	-0.56437	-0.0344395	1.2505	-0.326641	-0.0534522	-0.270782	-0.462386	-0.829579	1.79198	0.113801	-0.276357	-0.319928	-0.556609	-0.625969	-0.579406	-0.220791	-0.441367	-0.126068
TCGA-VQ-AA6K	TCGA-STAD	12.6	1	TMEcluster-A	2.07652	-0.381611	1.65748	1.54957	-0.054965	0.542345	-0.722749	-0.747197	-0.778881	-0.0534522	-1.42517	-0.462386	1.20027	-0.8609	-0.703144	-1.37544	-0.319928	0.00125527	0.327752	-0.579406	-0.220791	-0.441367	0.120187
TCGA-ZA-A8F6	TCGA-STAD	17.5	0	TMEcluster-B	-1.1744	0.0506078	-0.442856	-1.121	-0.054965	-1.38478	-0.858063	0.157166	0.621931	-0.0534522	-0.398576	-0.0427105	-0.829579	3.81272	-1.07528	-0.0929156	0.407362	-0.726004	0.866612	-0.218382	-0.220791	-0.441367	0.715847
TCGA-ZQ-A9CR	TCGA-STAD	0.8	1	TMEcluster-C	-0.43236	-0.381611	-0.381535	-0.0653239	-0.054965	-0.188545	3.19968	-0.756273	-0.802319	-0.0534522	1.15792	-0.462386	-0.758809	-0.212574	1.47322	-0.348927	-0.319928	-0.435961	0.346257	-0.579406	-0.220791	-0.0109617	1.4394

## Sheet: S3
Supplementary Table-S3: Kmeans cluster and Hazard ratios of tumor microenvironment cells in gastric cancer
Cell types	HR (95%CI)	Log_rank_p_value	Relative Fractions	Kmeans_cluster
Macrophages M1	0.861 (0.74-1.001)	0.0514	7.395	A
T cells CD4 memory activated	0.525 (0.418-0.659)	1.61e-08	2.992	A
T cells CD8	0.834 (0.699-0.996)	0.0451	2.033	A
T cells follicular helper	0.837 (0.716-0.979)	0.0255	6.755	A
T cells gamma delta	1.507 (1.297-1.752)	6.67e-08	3.689	A
Dendritic cells resting	1.283 (1.102-1.493)	0.00125	1.491	B
Eosinophils	0.66 (0.568-0.768)	5.17e-08	3.817	B
Fibroblasts	1.531 (1.318-1.778)	1.88e-08	14.84	B
Macrophages M2	1.398 (1.198-1.63)	1.82e-05	14.85	B
Mast cells resting	1.238 (1.063-1.443)	0.00606	2.706	B
Monocytes	1.191 (1.001-1.417)	0.0473	0.241	B
T cells CD4 memory resting	1.343 (1.133-1.592)	0.000661	14.871	B
Dendritic cells activated	0.714 (0.56-0.91)	0.00611	4.026	C
Macrophages M0	0.797 (0.654-0.972)	0.0245	5.197	C
Mast cells activated	0.722 (0.62-0.84)	2.17e-05	2.428	C
[truncated: 8 more rows]

## Sheet: S4
Supplementary Table-S4: Cellular interaction of tumor microenvironment cells
[truncated: 98 more rows]

[truncated: 10 more sheets: S5, S6, S7, S8, S9, S10, S11, S12, S13, S14]
